# Supplementary material for: Association of Cathepsins with Muscle &amp; Joint Diseases (BMJD) : a Mendelian randomisation study
Source: Research Square preprint supplement (doi:10.21203/rs.3.rs-4900506/v1), 2024-09-25
Supplement: Supplementary file 1 [file a15c9986c76fed920e7f2f63.xlsx]

## Sheet: Sheet1
The Mendelian Randomization Analysis Results of 9 Kinds of Cathepsins and 38 Types of BMJD
	Exposure	Outcome	method	nsnp	b	se	pval	lo_ci	up_ci	or	or_lci95	or_uci95	F	Q_pval	MR-egger pval	MR-PRESSO Pvalue	FDR-adjustP
1	Cathepsin B	Gout	Inverse variance weighted	17	0.0267972	0.0444554	0.546649	-0.0603353	0.11393	1.02716	0.941449	1.12067	35.5021	0.916668	0.80767	0.926	1
2	Cathepsin B	Gout	MR Egger	17	0.0499929	0.103636	0.636493	-0.153134	0.253119	1.05126	0.858015	1.28804		0.884789			1
3	Cathepsin B	Gout	Weighted median	17	0.023097	0.0620553	0.709743	-0.0985313	0.144725	1.02337	0.906167	1.15572					1
4	Cathepsin B	Gout	Simple mode	17	-0.0010123	0.0971517	0.991815	-0.19143	0.189405	0.998988	0.825778	1.20853					1
5	Cathepsin B	Gout	Weighted mode	17	0.0207642	0.0726577	0.778712	-0.121645	0.163173	1.02098	0.885463	1.17724					1
6	Cathepsin B	Gout	Maximum likelihood	17	0.0271733	0.0448297	0.544418	-0.0606929	0.11504	1.02755	0.941112	1.12192					1
7	Cathepsin F	Gout	Inverse variance weighted	12	0.0971261	0.0714557	0.174068	-0.0429272	0.237179	1.102	0.957981	1.26767	36.6058	0.00513644	0.193455	0.009	0.849241
8	Cathepsin F	Gout	MR Egger	12	-0.104957	0.160347	0.527519	-0.419237	0.209324	0.900364	0.657548	1.23284		0.0134761			1
9	Cathepsin F	Gout	Weighted median	12	0.0708257	0.0628281	0.259618	-0.0523174	0.193969	1.07339	0.949028	1.21406					0.989022
10	Cathepsin F	Gout	Simple mode	12	0.0515655	0.0888019	0.57316	-0.122486	0.225617	1.05292	0.884718	1.2531					1
11	Cathepsin F	Gout	Weighted mode	12	0.0700121	0.0767806	0.381398	-0.0804778	0.220502	1.07252	0.922675	1.2467					1
12	Cathepsin F	Gout	Maximum likelihood	12	0.103753	0.0480183	0.0307183	0.00963743	0.197869	1.10933	1.00968	1.2188					0.70652
13	Cathepsin G	Gout	Inverse variance weighted	13	0.103887	0.0699763	0.137648	-0.0332662	0.241041	1.10948	0.967281	1.27257	22.9823	0.0390094	0.810237	0.078	0.852357
14	Cathepsin G	Gout	MR Egger	13	0.133603	0.141095	0.364028	-0.142944	0.41015	1.14294	0.866803	1.50704		0.0263847			1
15	Cathepsin G	Gout	Weighted median	13	0.0503805	0.0757637	0.506071	-0.0981164	0.198877	1.05167	0.906543	1.22003					1
16	Cathepsin G	Gout	Simple mode	13	0.0486195	0.0972025	0.625989	-0.141897	0.239136	1.04982	0.86771	1.27015					1
17	Cathepsin G	Gout	Weighted mode	13	0.0447765	0.0759815	0.566584	-0.104147	0.1937	1.04579	0.901093	1.21373					1
18	Cathepsin G	Gout	Maximum likelihood	13	0.10931	0.0552167	0.0477431	0.00108491	0.217534	1.11551	1.00109	1.24301					0.591279
19	Cathepsin E	Gout	Inverse variance weighted	10	-0.00681662	0.0483189	0.88781	-0.101522	0.0878885	0.993207	0.903462	1.09187	21.973	0.888642	0.607306	0.899	0.979024
20	Cathepsin E	Gout	MR Egger	10	-0.0415136	0.0808914	0.621678	-0.200061	0.117034	0.959336	0.818681	1.12416		0.853458			1
21	Cathepsin E	Gout	Weighted median	10	-0.0183339	0.0638065	0.773856	-0.143395	0.106727	0.981833	0.866412	1.11263					1
22	Cathepsin E	Gout	Simple mode	10	-0.0276768	0.0909868	0.767903	-0.206011	0.150657	0.972703	0.813824	1.1626					1
23	Cathepsin E	Gout	Weighted mode	10	-0.0260484	0.0674626	0.70838	-0.158275	0.106178	0.974288	0.853615	1.11202					1
24	Cathepsin E	Gout	Maximum likelihood	10	-0.00691044	0.048651	0.887048	-0.102266	0.0884456	0.993113	0.902789	1.09247					0.971528
25	Cathepsin H	Gout	Inverse variance weighted	11	0.00250243	0.0289166	0.931037	-0.0541741	0.0591789	1.00251	0.947267	1.06097	126.485	0.513314	0.0966225	0.429	0.973357
26	Cathepsin H	Gout	MR Egger	11	-0.0480827	0.0397495	0.25723	-0.125992	0.0298264	0.953055	0.881622	1.03028		0.763759			1
27	Cathepsin H	Gout	Weighted median	11	-0.0257828	0.0308212	0.402858	-0.0861923	0.0346268	0.974547	0.917418	1.03523					1
28	Cathepsin H	Gout	Simple mode	11	-0.00712766	0.0932524	0.940581	-0.189902	0.175647	0.992898	0.82704	1.19202					1
29	Cathepsin H	Gout	Weighted mode	11	-0.0227246	0.0314283	0.486209	-0.084324	0.0388748	0.977532	0.919133	1.03964					1
30	Cathepsin H	Gout	Maximum likelihood	11	0.00247414	0.0290082	0.93203	-0.0543819	0.0593302	1.00248	0.94707	1.06113					0.955776
31	Cathepsin O	Gout	Inverse variance weighted	12	-0.0752162	0.0770614	0.329037	-0.226256	0.0758242	0.927543	0.797514	1.07877	23.2138	0.0660618	0.250469	0.057	1
32	Cathepsin O	Gout	MR Egger	12	-0.267991	0.175087	0.156863	-0.611162	0.0751798	0.764914	0.54272	1.07808		0.0912023			1
33	Cathepsin O	Gout	Weighted median	12	0.0619425	0.0893812	0.4883	-0.113245	0.23713	1.0639	0.892932	1.26761					1
34	Cathepsin O	Gout	Simple mode	12	0.157739	0.14311	0.293894	-0.122755	0.438234	1.17086	0.88448	1.54997					1
35	Cathepsin O	Gout	Weighted mode	12	0.139754	0.146752	0.361398	-0.147881	0.427388	1.14999	0.862534	1.53325					1
36	Cathepsin O	Gout	Maximum likelihood	12	-0.0803398	0.0614824	0.191311	-0.200845	0.0401658	0.922803	0.818039	1.04098					0.716303
37	Cathepsin S	Gout	Inverse variance weighted	24	-0.0633811	0.0365049	0.0825221	-0.134931	0.00816848	0.938586	0.873777	1.0082	39.7152	0.676038	0.0614067	0.656	0.738114
38	Cathepsin S	Gout	MR Egger	24	-0.164908	0.0631294	0.0159088	-0.288641	-0.041174	0.847972	0.749281	0.959662		0.837867			0.636352
39	Cathepsin S	Gout	Weighted median	24	-0.119881	0.0525721	0.0225892	-0.222922	-0.0168394	0.887026	0.800177	0.983302					0.722855
40	Cathepsin S	Gout	Simple mode	24	-0.124112	0.0810803	0.139476	-0.283029	0.0348054	0.883281	0.753498	1.03542					1
41	Cathepsin S	Gout	Weighted mode	24	-0.116344	0.0542629	0.0428262	-0.222699	-0.00998875	0.890169	0.800355	0.990061					1
42	Cathepsin S	Gout	Maximum likelihood	24	-0.0637759	0.0371176	0.0857579	-0.136526	0.00897458	0.938215	0.872383	1.00901					0.552281
43	Cathepsin L2	Gout	Inverse variance weighted	11	-0.0242792	0.0662607	0.714052	-0.15415	0.105592	0.976013	0.857143	1.11137	24.6843	0.823455	0.302908	0.821	1
44	Cathepsin L2	Gout	MR Egger	11	0.159509	0.180777	0.400539	-0.194814	0.513832	1.17293	0.822988	1.67168		0.85901			1
45	Cathepsin L2	Gout	Weighted median	11	0.0174171	0.085403	0.8384	-0.149973	0.184807	1.01757	0.860731	1.20299					1
46	Cathepsin L2	Gout	Simple mode	11	-0.0251922	0.132926	0.853477	-0.285727	0.235343	0.975123	0.751468	1.26534					1
47	Cathepsin L2	Gout	Weighted mode	11	0.0408809	0.10558	0.706718	-0.166055	0.247817	1.04173	0.846999	1.28123					1
48	Cathepsin L2	Gout	Maximum likelihood	11	-0.0246223	0.0670232	0.713343	-0.155988	0.106743	0.975678	0.85557	1.11265					0.949159
49	Cathepsin Z	Gout	Inverse variance weighted	13	0.0317299	0.0421767	0.451865	-0.0509364	0.114396	1.03224	0.950339	1.1212	53.4584	0.397833	0.51773	0.474	1
50	Cathepsin Z	Gout	MR Egger	13	0.0669533	0.0681391	0.346924	-0.0665993	0.200506	1.06925	0.93557	1.22202		0.35467			1
51	Cathepsin Z	Gout	Weighted median	13	0.0677995	0.0555054	0.221899	-0.0409911	0.17659	1.07015	0.959838	1.19314					0.986219
52	Cathepsin Z	Gout	Simple mode	13	0.0837164	0.094622	0.393676	-0.101743	0.269176	1.08732	0.903262	1.30888					1
53	Cathepsin Z	Gout	Weighted mode	13	0.04048	0.0574871	0.494773	-0.0721948	0.153155	1.04131	0.93035	1.16551					1
54	Cathepsin Z	Gout	Maximum likelihood	13	0.0312457	0.041556	0.452115	-0.0502041	0.112696	1.03174	0.951035	1.11929					0.945331
55	Cathepsin B	Purulent arthritis	Inverse variance weighted	17	-0.0410085	0.0765249	0.592038	-0.190997	0.10898	0.959821	0.826135	1.11514	35.5021	0.976164	0.931312	0.973	1
56	Cathepsin B	Purulent arthritis	MR Egger	17	-0.0551207	0.178262	0.761414	-0.404514	0.294273	0.946371	0.667301	1.34215		0.962051			1
57	Cathepsin B	Purulent arthritis	Weighted median	17	-0.0513778	0.107096	0.631415	-0.261285	0.15853	0.94992	0.770061	1.17179					1
58	Cathepsin B	Purulent arthritis	Simple mode	17	-0.00563112	0.170883	0.97412	-0.340563	0.3293	0.994385	0.71137	1.39					1
59	Cathepsin B	Purulent arthritis	Weighted mode	17	-0.0389857	0.128947	0.766288	-0.291721	0.21375	0.961764	0.746977	1.23831					1
60	Cathepsin B	Purulent arthritis	Maximum likelihood	17	-0.0414316	0.0771286	0.591146	-0.192604	0.10974	0.959415	0.824809	1.11599					0.951745
61	Cathepsin F	Purulent arthritis	Inverse variance weighted	12	0.00708486	0.0786906	0.92826	-0.147149	0.161318	1.00711	0.863166	1.17506	36.6058	0.797283	0.675982	0.823	0.983223
62	Cathepsin F	Purulent arthritis	MR Egger	12	0.0788179	0.184284	0.677934	-0.282378	0.440014	1.08201	0.753989	1.55273		0.740748			1
63	Cathepsin F	Purulent arthritis	Weighted median	12	-0.0601499	0.10086	0.550929	-0.257836	0.137536	0.941623	0.772722	1.14744					1
64	Cathepsin F	Purulent arthritis	Simple mode	12	-0.0496807	0.147417	0.742453	-0.338618	0.239256	0.951533	0.712755	1.2703					1
65	Cathepsin F	Purulent arthritis	Weighted mode	12	-0.0496807	0.123748	0.695767	-0.292228	0.192866	0.951533	0.746599	1.21272					1
66	Cathepsin F	Purulent arthritis	Maximum likelihood	12	0.00722392	0.0794327	0.927537	-0.148464	0.162912	1.00725	0.862031	1.17693					0.963442
67	Cathepsin G	Purulent arthritis	Inverse variance weighted	13	-0.0529099	0.114576	0.644232	-0.277478	0.171658	0.948465	0.757692	1.18727	22.9823	0.0684054	0.35757	0.082	0.978503
68	Cathepsin G	Purulent arthritis	MR Egger	13	-0.236166	0.22279	0.311849	-0.672835	0.200503	0.789649	0.51026	1.22202		0.0729738			1
69	Cathepsin G	Purulent arthritis	Weighted median	13	-0.0195971	0.142785	0.890834	-0.299456	0.260262	0.980594	0.741221	1.29727					0.996737
70	Cathepsin G	Purulent arthritis	Simple mode	13	0.397359	0.339239	0.264201	-0.267549	1.06227	1.48789	0.765253	2.89292					1
71	Cathepsin G	Purulent arthritis	Weighted mode	13	-0.298017	0.177564	0.119105	-0.646042	0.0500077	0.742289	0.524116	1.05128					1
72	Cathepsin G	Purulent arthritis	Maximum likelihood	13	-0.0533721	0.0918258	0.561084	-0.233351	0.126606	0.948027	0.791876	1.13497					0.950889
73	Cathepsin E	Purulent arthritis	Inverse variance weighted	10	-0.0300004	0.082888	0.717398	-0.192461	0.13246	0.970445	0.824927	1.14163	21.973	0.78121	0.902514	0.831	0.995699
74	Cathepsin E	Purulent arthritis	MR Egger	10	-0.0159224	0.138816	0.911508	-0.288001	0.256156	0.984204	0.749761	1.29195		0.696058			1
75	Cathepsin E	Purulent arthritis	Weighted median	10	-0.0867693	0.109146	0.426622	-0.300695	0.127156	0.916889	0.740304	1.13559					1
76	Cathepsin E	Purulent arthritis	Simple mode	10	-0.114678	0.162248	0.497577	-0.432685	0.203329	0.891653	0.648765	1.22548					1
77	Cathepsin E	Purulent arthritis	Weighted mode	10	-0.0868684	0.124652	0.503475	-0.331187	0.15745	0.916798	0.718071	1.17052					1
78	Cathepsin E	Purulent arthritis	Maximum likelihood	10	-0.0305229	0.0835508	0.714871	-0.194282	0.133237	0.969938	0.823425	1.14252					0.943396
79	Cathepsin H	Purulent arthritis	Inverse variance weighted	11	0.0480366	0.0621223	0.43937	-0.0737232	0.169796	1.04921	0.928929	1.18506	126.485	0.110967	0.246557	0.286	1
80	Cathepsin H	Purulent arthritis	MR Egger	11	-0.0227085	0.0831938	0.791044	-0.185768	0.140351	0.977547	0.830466	1.15068		0.147616			0.988806
81	Cathepsin H	Purulent arthritis	Weighted median	11	-0.0220989	0.0533495	0.678707	-0.126664	0.0824662	0.978143	0.88103	1.08596					1
82	Cathepsin H	Purulent arthritis	Simple mode	11	0.0647901	0.18702	0.736195	-0.301769	0.431349	1.06694	0.739509	1.53933					1
83	Cathepsin H	Purulent arthritis	Weighted mode	11	-0.0158398	0.0584747	0.79199	-0.13045	0.0987707	0.984285	0.8777	1.10381					1
84	Cathepsin H	Purulent arthritis	Maximum likelihood	11	0.0485246	0.0499708	0.331519	-0.0494182	0.146467	1.04972	0.951783	1.15774					0.920252
85	Cathepsin O	Purulent arthritis	Inverse variance weighted	12	0.0364066	0.100945	0.718356	-0.161446	0.234259	1.03708	0.850912	1.26397	23.2138	0.919633	0.449417	0.918	0.988506
86	Cathepsin O	Purulent arthritis	MR Egger	12	0.201467	0.232713	0.406928	-0.25465	0.657583	1.2232	0.775188	1.93012		0.915773			1
87	Cathepsin O	Purulent arthritis	Weighted median	12	-0.00713226	0.132354	0.957025	-0.266546	0.252282	0.992893	0.76602	1.28696					1
88	Cathepsin O	Purulent arthritis	Simple mode	12	-0.0482513	0.185119	0.799177	-0.411084	0.314581	0.952894	0.662931	1.36969					1
89	Cathepsin O	Purulent arthritis	Weighted mode	12	-0.0388268	0.191159	0.842755	-0.413498	0.335844	0.961917	0.661333	1.39912					0.963148
90	Cathepsin O	Purulent arthritis	Maximum likelihood	12	0.0377947	0.101888	0.710679	-0.161905	0.237495	1.03852	0.850522	1.26807					0.953494
91	Cathepsin S	Purulent arthritis	Inverse variance weighted	24	-0.0160085	0.0626338	0.798269	-0.138771	0.106754	0.984119	0.870428	1.11266	39.7152	0.612055	0.219702	0.589	0.981078
92	Cathepsin S	Purulent arthritis	MR Egger	24	0.0956463	0.108326	0.38681	-0.116672	0.307965	1.10037	0.889877	1.36065		0.651714			1
93	Cathepsin S	Purulent arthritis	Weighted median	24	0.0706552	0.0883983	0.424127	-0.102605	0.243916	1.07321	0.902483	1.27624					1
94	Cathepsin S	Purulent arthritis	Simple mode	24	-0.00930926	0.201863	0.963615	-0.404961	0.386343	0.990734	0.667003	1.47159					1
95	Cathepsin S	Purulent arthritis	Weighted mode	24	0.0775667	0.0920215	0.407954	-0.102795	0.257929	1.08065	0.902312	1.29425					1
96	Cathepsin S	Purulent arthritis	Maximum likelihood	24	-0.0161682	0.0634424	0.79884	-0.140515	0.108179	0.983962	0.86891	1.11425					0.9598
97	Cathepsin L2	Purulent arthritis	Inverse variance weighted	11	0.0686149	0.113619	0.545909	-0.154079	0.291309	1.07102	0.857204	1.33818	24.6843	0.48597	0.596875	0.52	1
98	Cathepsin L2	Purulent arthritis	MR Egger	11	0.228052	0.312662	0.484314	-0.384767	0.84087	1.25615	0.680609	2.31838		0.420197			1
99	Cathepsin L2	Purulent arthritis	Weighted median	11	0.0142415	0.150977	0.924848	-0.281673	0.310156	1.01434	0.75452	1.36364					1
100	Cathepsin L2	Purulent arthritis	Simple mode	11	0.224451	0.243369	0.378105	-0.252553	0.701455	1.25164	0.776815	2.01668					1
101	Cathepsin L2	Purulent arthritis	Weighted mode	11	-0.0396145	0.221193	0.86144	-0.473153	0.393924	0.96116	0.623035	1.48279					0.963849
102	Cathepsin L2	Purulent arthritis	Maximum likelihood	11	0.0706349	0.115314	0.540177	-0.15538	0.29665	1.07319	0.85609	1.34534					1
103	Cathepsin Z	Purulent arthritis	Inverse variance weighted	13	-0.0396283	0.0729221	0.586832	-0.182556	0.103299	0.961147	0.833138	1.10882	53.4584	0.389255	0.441846	0.457	1
104	Cathepsin Z	Purulent arthritis	MR Egger	13	-0.112505	0.117588	0.359241	-0.342978	0.117969	0.893593	0.709654	1.12521		0.361392			1
105	Cathepsin Z	Purulent arthritis	Weighted median	13	-0.0639346	0.0963177	0.506826	-0.252717	0.124848	0.938066	0.776687	1.13298					1
106	Cathepsin Z	Purulent arthritis	Simple mode	13	0.178774	0.173624	0.323475	-0.161529	0.519077	1.19575	0.850842	1.68048					1
107	Cathepsin Z	Purulent arthritis	Weighted mode	13	-0.0470816	0.096259	0.633578	-0.235749	0.141586	0.95401	0.789979	1.1521					1
108	Cathepsin Z	Purulent arthritis	Maximum likelihood	13	-0.0403828	0.0716317	0.572921	-0.180781	0.100015	0.960422	0.834618	1.10519					0.95093
109	Cathepsin B	Cervical spondylopathy	Inverse variance weighted	5	-0.000182171	0.000394395	0.644152	-0.000955186	0.000590843	0.999818	0.999045	1.00059	66.8531	0.706531	0.738506	0.758	0.9877
110	Cathepsin B	Cervical spondylopathy	MR Egger	5	8e-05	0.000817261	0.928226	-0.00152187	0.0016818	1.00008	0.998479	1.00168		0.567245			0.990107
111	Cathepsin B	Cervical spondylopathy	Weighted median	5	-7.6e-05	0.000444888	0.864376	-0.000947971	0.000795992	0.999924	0.999052	1.0008					0.994966
112	Cathepsin B	Cervical spondylopathy	Simple mode	5	0.000149138	0.000749849	0.852048	-0.00132057	0.00161884	1.00015	0.99868	1.00162					1
113	Cathepsin B	Cervical spondylopathy	Weighted mode	5	-5.07e-05	0.000468067	0.918984	-0.000968096	0.000866726	0.999949	0.999032	1.00087					0.980249
114	Cathepsin B	Cervical spondylopathy	Maximum likelihood	5	-0.000183424	0.000395817	0.643073	-0.000959225	0.000592377	0.999817	0.999041	1.00059					0.967615
115	Cathepsin F	Cervical spondylopathy	Inverse variance weighted	6	4.22e-05	0.000506791	0.933563	-0.000951062	0.00103556	1.00004	0.999049	1.00104	49.9597	0.181288	0.512974	0.298	0.969701
116	Cathepsin F	Cervical spondylopathy	MR Egger	6	-0.00109157	0.00166872	0.548724	-0.00436227	0.00217912	0.998909	0.995647	1.00218		0.151921			1
117	Cathepsin F	Cervical spondylopathy	Weighted median	6	-0.000146972	0.00051446	0.775121	-0.00115531	0.000861369	0.999853	0.998845	1.00086					1
118	Cathepsin F	Cervical spondylopathy	Simple mode	6	-8.88e-05	0.000648069	0.896406	-0.00135897	0.00118146	0.999911	0.998642	1.00118					1
119	Cathepsin F	Cervical spondylopathy	Weighted mode	6	-0.000172882	0.000555686	0.768267	-0.00126203	0.000916263	0.999827	0.998739	1.00092					1
120	Cathepsin F	Cervical spondylopathy	Maximum likelihood	6	4.34e-05	0.000417091	0.917147	-0.00077411	0.000860888	1.00004	0.999226	1.00086					0.971452
121	Cathepsin G	Cervical spondylopathy	Inverse variance weighted	2	-0.00149392	0.00105778	0.157858	-0.00356718	0.000579333	0.998507	0.996439	1.00058	21.8288	0.530362			0.847169
122	Cathepsin G	Cervical spondylopathy	Maximum likelihood	2	-0.00150562	0.00108504	0.165253	-0.00363229	0.000621054	0.998496	0.996374	1.00062					0.739048
123	Cathepsin E	Cervical spondylopathy	Inverse variance weighted	5	0.000192975	0.000757864	0.799009	-0.00129244	0.00167839	1.00019	0.998708	1.00168	21.7849	0.278906	0.764138	0.317	0.974549
124	Cathepsin E	Cervical spondylopathy	MR Egger	5	0.00254373	0.00720782	0.747495	-0.0115836	0.0166711	1.00255	0.988483	1.01681		0.178786			1
125	Cathepsin E	Cervical spondylopathy	Weighted median	5	-0.000913069	0.000948423	0.335686	-0.00277198	0.000945839	0.999087	0.997232	1.00095					1
126	Cathepsin E	Cervical spondylopathy	Simple mode	5	-0.00100945	0.00136432	0.50044	-0.00368351	0.00166462	0.998991	0.996323	1.00167					1
127	Cathepsin E	Cervical spondylopathy	Weighted mode	5	-0.00100945	0.00135734	0.498372	-0.00366983	0.00165094	0.998991	0.996337	1.00165					1
128	Cathepsin E	Cervical spondylopathy	Maximum likelihood	5	0.000202632	0.000688828	0.768629	-0.00114747	0.00155273	1.0002	0.998853	1.00155					0.959296
129	Cathepsin H	Cervical spondylopathy	Inverse variance weighted	4	-0.000299985	0.000735553	0.683394	-0.00174167	0.0011417	0.9997	0.99826	1.00114	22.7047	0.621336	0.59676	0.671	1
130	Cathepsin H	Cervical spondylopathy	MR Egger	4	0.00219674	0.00407339	0.643693	-0.00578711	0.0101806	1.0022	0.99423	1.01023		0.500992			1
131	Cathepsin H	Cervical spondylopathy	Weighted median	4	-0.00018853	0.000887385	0.831752	-0.0019278	0.00155074	0.999811	0.998074	1.00155					1
132	Cathepsin H	Cervical spondylopathy	Simple mode	4	-7.09e-05	0.00122838	0.957621	-0.0024785	0.00233676	0.999929	0.997525	1.00234					1
133	Cathepsin H	Cervical spondylopathy	Weighted mode	4	-7.09e-05	0.00118704	0.956147	-0.00239747	0.00225574	0.999929	0.997605	1.00226					0.96825
134	Cathepsin H	Cervical spondylopathy	Maximum likelihood	4	-0.00030612	0.000743697	0.680619	-0.00176377	0.00115153	0.999694	0.998238	1.00115					0.969731
135	Cathepsin O	Cervical spondylopathy	Inverse variance weighted	3	0.000808735	0.000840283	0.335821	-0.000838219	0.00245569	1.00081	0.999162	1.00246	23.1196	0.516505	0.728613		0.983039
136	Cathepsin O	Cervical spondylopathy	MR Egger	3	-0.00195767	0.00615466	0.803947	-0.0140208	0.0101055	0.998044	0.986077	1.01016		0.295274			0.98192
137	Cathepsin O	Cervical spondylopathy	Weighted median	3	0.000557523	0.00101764	0.583788	-0.00143705	0.00255209	1.00056	0.998564	1.00256					0.983222
138	Cathepsin O	Cervical spondylopathy	Simple mode	3	0.00040815	0.00121903	0.769619	-0.00198115	0.00279745	1.00041	0.998021	1.0028					1
139	Cathepsin O	Cervical spondylopathy	Weighted mode	3	0.000319926	0.00132217	0.831352	-0.00227153	0.00291139	1.00032	0.997731	1.00292					0.970922
140	Cathepsin O	Cervical spondylopathy	Maximum likelihood	3	0.000824424	0.000854506	0.334647	-0.000850407	0.00249926	1.00082	0.99915	1.0025					0.913189
141	Cathepsin S	Cervical spondylopathy	Inverse variance weighted	12	7.61e-05	0.000447993	0.865032	-0.00080192	0.000954213	1.00008	0.999198	1.00095	23.1248	0.336862	0.352843	0.358	0.987731
142	Cathepsin S	Cervical spondylopathy	MR Egger	12	-0.00291104	0.0030984	0.369598	-0.0089839	0.00316183	0.997093	0.991056	1.00317		0.335184			1
143	Cathepsin S	Cervical spondylopathy	Weighted median	12	-0.000504065	0.000582286	0.386674	-0.00164535	0.000637216	0.999496	0.998356	1.00064					1
144	Cathepsin S	Cervical spondylopathy	Simple mode	12	-0.000594001	0.000884793	0.515852	-0.0023282	0.00114019	0.999406	0.997675	1.00114					1
145	Cathepsin S	Cervical spondylopathy	Weighted mode	12	-0.00056358	0.000912069	0.549211	-0.00235124	0.00122408	0.999437	0.997652	1.00122					1
146	Cathepsin S	Cervical spondylopathy	Maximum likelihood	12	7.9e-05	0.000432259	0.855033	-0.000768254	0.000926202	1.00008	0.999232	1.00093					0.96266
147	Cathepsin L2	Cervical spondylopathy	Inverse variance weighted	5	-0.000504	0.00103612	0.626663	-0.0025348	0.0015268	0.999496	0.997468	1.00153	26.6363	0.0202297	0.863353	0.056	1
148	Cathepsin L2	Cervical spondylopathy	MR Egger	5	0.000565869	0.0058336	0.928842	-0.010868	0.0119997	1.00057	0.989191	1.01207		0.00927993			0.984204
149	Cathepsin L2	Cervical spondylopathy	Weighted median	5	-0.000283664	0.000852536	0.739338	-0.00195464	0.00138731	0.999716	0.998047	1.00139					1
150	Cathepsin L2	Cervical spondylopathy	Simple mode	5	-0.000248453	0.00112121	0.835484	-0.00244603	0.00194912	0.999752	0.997557	1.00195					1
151	Cathepsin L2	Cervical spondylopathy	Weighted mode	5	-0.000274997	0.000999666	0.796872	-0.00223434	0.00168435	0.999725	0.997768	1.00169					0.980766
152	Cathepsin L2	Cervical spondylopathy	Maximum likelihood	5	-0.000550626	0.000636843	0.387248	-0.00179884	0.000697585	0.99945	0.998203	1.0007					1
153	Cathepsin Z	Cervical spondylopathy	Inverse variance weighted	7	0.000133855	0.000394769	0.734556	-0.000639893	0.000907603	1.00013	0.99936	1.00091	46.7709	0.832449	0.520725	0.828	0.985529
154	Cathepsin Z	Cervical spondylopathy	MR Egger	7	-0.000418755	0.000892567	0.658702	-0.00216819	0.00133068	0.999581	0.997834	1.00133		0.801535			1
155	Cathepsin Z	Cervical spondylopathy	Weighted median	7	-6.87e-05	0.000466006	0.882808	-0.000982067	0.000844678	0.999931	0.999018	1.00085					1
156	Cathepsin Z	Cervical spondylopathy	Simple mode	7	-0.000176242	0.000748724	0.821735	-0.00164374	0.00129126	0.999824	0.998358	1.00129					1
157	Cathepsin Z	Cervical spondylopathy	Weighted mode	7	-0.000122364	0.000498499	0.814277	-0.00109942	0.000854694	0.999878	0.998901	1.00086					0.972271
158	Cathepsin Z	Cervical spondylopathy	Maximum likelihood	7	0.000134932	0.000396589	0.733683	-0.000642382	0.000912245	1.00013	0.999358	1.00091					0.944983
159	Cathepsin B	Meniscal disorders	Inverse variance weighted	17	0.0141054	0.0274595	0.607476	-0.0397153	0.0679261	1.01421	0.961063	1.07029	35.5021	0.183098	0.898915	0.166	1
160	Cathepsin B	Meniscal disorders	MR Egger	17	0.0218062	0.0659998	0.745669	-0.107553	0.151166	1.02205	0.898029	1.16319		0.141408			1
161	Cathepsin B	Meniscal disorders	Weighted median	17	0.0768775	0.0334243	0.0214455	0.0113659	0.142389	1.07991	1.01143	1.15303					0.85782
162	Cathepsin B	Meniscal disorders	Simple mode	17	0.0380359	0.0747389	0.617756	-0.108452	0.184524	1.03877	0.897222	1.20265					1
163	Cathepsin B	Meniscal disorders	Weighted mode	17	0.0626046	0.041586	0.1517	-0.0189039	0.144113	1.06461	0.981274	1.15501					1
164	Cathepsin B	Meniscal disorders	Maximum likelihood	17	0.0146223	0.0245859	0.552014	-0.033566	0.0628106	1.01473	0.966991	1.06483					0.998588
165	Cathepsin F	Meniscal disorders	Inverse variance weighted	12	0.0277701	0.0274622	0.311915	-0.0260558	0.081596	1.02816	0.974281	1.08502	36.6058	0.261844	0.715544	0.249	0.984674
166	Cathepsin F	Meniscal disorders	MR Egger	12	0.00506485	0.0669738	0.94121	-0.126204	0.136333	1.00508	0.881435	1.14606		0.20665			0.965343
167	Cathepsin F	Meniscal disorders	Weighted median	12	0.00536611	0.0361832	0.882103	-0.0655529	0.0762851	1.00538	0.936549	1.07927					1
168	Cathepsin F	Meniscal disorders	Simple mode	12	0.0230768	0.0662425	0.73414	-0.106759	0.152912	1.02335	0.898743	1.16522					1
169	Cathepsin F	Meniscal disorders	Weighted mode	12	0.00505414	0.0547894	0.928161	-0.102333	0.112441	1.00507	0.902729	1.11901					0.970626
170	Cathepsin F	Meniscal disorders	Maximum likelihood	12	0.0286537	0.0252474	0.25641	-0.0208312	0.0781385	1.02907	0.979384	1.08127					0.778905
171	Cathepsin G	Meniscal disorders	Inverse variance weighted	13	-0.00431299	0.0290354	0.881915	-0.0612224	0.0525964	0.995696	0.940614	1.054	22.9823	0.375525	0.58487	0.392	0.992925
172	Cathepsin G	Meniscal disorders	MR Egger	13	-0.0322854	0.0580036	0.588938	-0.145972	0.0814016	0.96823	0.864181	1.08481		0.323758			1
173	Cathepsin G	Meniscal disorders	Weighted median	13	-0.00134413	0.0421152	0.974539	-0.08389	0.0812017	0.998657	0.919532	1.08459					1
174	Cathepsin G	Meniscal disorders	Simple mode	13	0.0343394	0.0646043	0.604749	-0.092285	0.160964	1.03494	0.911845	1.17464					1
175	Cathepsin G	Meniscal disorders	Weighted mode	13	-0.00314904	0.0424226	0.94205	-0.0862973	0.0799992	0.996856	0.917322	1.08329					0.972439
176	Cathepsin G	Meniscal disorders	Maximum likelihood	13	-0.00445741	0.0285356	0.875871	-0.0603871	0.0514723	0.995553	0.9414	1.05282					0.979273
177	Cathepsin E	Meniscal disorders	Inverse variance weighted	10	-0.0469919	0.0261958	0.0728335	-0.0983357	0.00435184	0.954095	0.906345	1.00436	21.973	0.768145	0.38921	0.794	0.902015
178	Cathepsin E	Meniscal disorders	MR Egger	10	-0.0148991	0.0439185	0.74316	-0.100979	0.0711812	0.985211	0.903952	1.07378		0.769756			1
179	Cathepsin E	Meniscal disorders	Weighted median	10	-0.041901	0.0364267	0.250027	-0.113297	0.0294953	0.958965	0.892885	1.02993					1
180	Cathepsin E	Meniscal disorders	Simple mode	10	-0.0786531	0.0560694	0.194224	-0.188549	0.0312429	0.92436	0.82816	1.03174					1
181	Cathepsin E	Meniscal disorders	Weighted mode	10	-0.0364283	0.0442276	0.43142	-0.123114	0.0502578	0.964227	0.884163	1.05154					1
182	Cathepsin E	Meniscal disorders	Maximum likelihood	10	-0.0482044	0.027101	0.0752895	-0.101322	0.00491349	0.952939	0.903642	1.00493					0.637979
183	Cathepsin H	Meniscal disorders	Inverse variance weighted	11	-0.0309217	0.0247911	0.21229	-0.0795122	0.0176688	0.969551	0.923567	1.01783	126.485	0.00511877	0.959943	0.104	0.89944
184	Cathepsin H	Meniscal disorders	MR Egger	11	-0.0296501	0.0359034	0.430248	-0.100021	0.0407206	0.970785	0.904819	1.04156		0.00284691			1
185	Cathepsin H	Meniscal disorders	Weighted median	11	-0.0260494	0.0169909	0.125241	-0.0593515	0.00725269	0.974287	0.942375	1.00728					0.83494
186	Cathepsin H	Meniscal disorders	Simple mode	11	-0.0255924	0.0526924	0.637649	-0.12887	0.0776846	0.974732	0.879089	1.08078					1
187	Cathepsin H	Meniscal disorders	Weighted mode	11	-0.0255924	0.0165973	0.15411	-0.0581232	0.00693834	0.974732	0.943534	1.00696					1
188	Cathepsin H	Meniscal disorders	Maximum likelihood	11	-0.0313528	0.0158046	0.0472802	-0.0623297	-0.000375856	0.969134	0.939573	0.999624					0.634343
189	Cathepsin O	Meniscal disorders	Inverse variance weighted	12	-0.0123293	0.0318735	0.698889	-0.0748014	0.0501427	0.987746	0.927928	1.05142	23.2138	0.831405	0.574947	0.841	1
190	Cathepsin O	Meniscal disorders	MR Egger	12	-0.0508185	0.0736498	0.50589	-0.195172	0.093535	0.950451	0.822693	1.09805		0.793676			1
191	Cathepsin O	Meniscal disorders	Weighted median	12	-0.00798372	0.0420491	0.849414	-0.0904	0.0744326	0.992048	0.913566	1.07727					0.99931
192	Cathepsin O	Meniscal disorders	Simple mode	12	-0.0227652	0.0573141	0.698817	-0.135101	0.0895703	0.977492	0.873628	1.0937					1
193	Cathepsin O	Meniscal disorders	Weighted mode	12	-0.010504	0.0581871	0.860026	-0.124551	0.103543	0.989551	0.882893	1.10909					0.969043
194	Cathepsin O	Meniscal disorders	Maximum likelihood	12	-0.0123532	0.0322031	0.701273	-0.0754713	0.0507649	0.987723	0.927306	1.05208					0.973319
195	Cathepsin S	Meniscal disorders	Inverse variance weighted	24	-0.00928448	0.0197522	0.638321	-0.0479989	0.0294299	0.990758	0.953135	1.02987	39.7152	0.745862	0.873523	0.762	0.997764
196	Cathepsin S	Meniscal disorders	MR Egger	24	-0.00479737	0.0341527	0.889568	-0.0717367	0.0621419	0.995214	0.930776	1.06411		0.694871			1
197	Cathepsin S	Meniscal disorders	Weighted median	24	-0.0162899	0.028723	0.570622	-0.072587	0.0400073	0.983842	0.929985	1.04082					0.981715
198	Cathepsin S	Meniscal disorders	Simple mode	24	0.0421746	0.049783	0.40563	-0.0554001	0.139749	1.04308	0.946107	1.14999					1
199	Cathepsin S	Meniscal disorders	Weighted mode	24	-0.0105971	0.0295471	0.723127	-0.0685093	0.0473152	0.989459	0.933785	1.04845					1
200	Cathepsin S	Meniscal disorders	Maximum likelihood	24	-0.00931844	0.0199497	0.640431	-0.0484199	0.029783	0.990725	0.952734	1.03023					0.97273
201	Cathepsin L2	Meniscal disorders	Inverse variance weighted	11	-0.0209296	0.0405232	0.605517	-0.100355	0.0584959	0.979288	0.904516	1.06024	24.6843	0.238424	0.50029	0.256	1
202	Cathepsin L2	Meniscal disorders	MR Egger	11	0.0533271	0.113629	0.650009	-0.169385	0.27604	1.05477	0.844184	1.3179		0.208802			1
203	Cathepsin L2	Meniscal disorders	Weighted median	11	-0.0402588	0.0540065	0.456004	-0.146112	0.065594	0.960541	0.864061	1.06779					1
204	Cathepsin L2	Meniscal disorders	Simple mode	11	-0.049709	0.0877069	0.583372	-0.221615	0.122197	0.951506	0.801224	1.12998					1
205	Cathepsin L2	Meniscal disorders	Weighted mode	11	-0.0361889	0.0762362	0.645201	-0.185612	0.113234	0.964458	0.830596	1.11989					1
206	Cathepsin L2	Meniscal disorders	Maximum likelihood	11	-0.0215623	0.0370037	0.560091	-0.0940895	0.0509649	0.978669	0.910201	1.05229					0.959304
207	Cathepsin Z	Meniscal disorders	Inverse variance weighted	13	0.0050398	0.0241339	0.834583	-0.0422626	0.0523422	1.00505	0.958618	1.05374	53.4584	0.300255	0.983294	0.365	0.987999
208	Cathepsin Z	Meniscal disorders	MR Egger	13	0.00570702	0.0400704	0.88932	-0.072831	0.084245	1.00572	0.929758	1.0879		0.232633			1
209	Cathepsin Z	Meniscal disorders	Weighted median	13	-0.0105704	0.0295977	0.72099	-0.0685819	0.0474411	0.989485	0.933717	1.04858					1
210	Cathepsin Z	Meniscal disorders	Simple mode	13	-0.0533336	0.0502332	0.309264	-0.151791	0.0451235	0.948064	0.859168	1.04616					1
211	Cathepsin Z	Meniscal disorders	Weighted mode	13	-0.017721	0.0316406	0.585735	-0.0797367	0.0442946	0.982435	0.923359	1.04529					1
212	Cathepsin Z	Meniscal disorders	Maximum likelihood	13	0.00504855	0.022616	0.823357	-0.0392788	0.0493759	1.00506	0.961483	1.05062					0.981929
213	Cathepsin B	Carpal tunnel syndrome	Inverse variance weighted	19	0.015169	0.0204435	0.45809	-0.0249003	0.0552382	1.01528	0.975407	1.05679	34.3177	0.202152	0.680871	0.226	0.983366
214	Cathepsin B	Carpal tunnel syndrome	MR Egger	19	0.0339318	0.0494845	0.502144	-0.0630578	0.130921	1.03451	0.938889	1.13988		0.16716			1
215	Cathepsin B	Carpal tunnel syndrome	Weighted median	19	0.0381383	0.0272999	0.162409	-0.0153694	0.0916461	1.03887	0.984748	1.09598					0.86618
216	Cathepsin B	Carpal tunnel syndrome	Simple mode	19	0.0442334	0.0510692	0.397808	-0.0558622	0.144329	1.04523	0.945669	1.15526					1
217	Cathepsin B	Carpal tunnel syndrome	Weighted mode	19	0.0386777	0.0281191	0.185856	-0.0164358	0.0937911	1.03944	0.983699	1.09833					1
218	Cathepsin B	Carpal tunnel syndrome	Maximum likelihood	19	0.0156818	0.0185573	0.398083	-0.0206904	0.0520541	1.01581	0.979522	1.05343					1
219	Cathepsin F	Carpal tunnel syndrome	Inverse variance weighted	12	-0.00900098	0.0230883	0.696647	-0.054254	0.0362521	0.991039	0.947191	1.03692	36.6058	0.262525	0.364434	0.303	1
220	Cathepsin F	Carpal tunnel syndrome	MR Egger	12	-0.0589353	0.0574435	0.329083	-0.171525	0.053654	0.942768	0.84238	1.05512		0.260885			1
221	Cathepsin F	Carpal tunnel syndrome	Weighted median	12	-0.00969942	0.0288165	0.736424	-0.0661797	0.0467809	0.990347	0.935963	1.04789					1
222	Cathepsin F	Carpal tunnel syndrome	Simple mode	12	-0.00460644	0.0461293	0.922253	-0.0950199	0.085807	0.995404	0.909355	1.0896					1
223	Cathepsin F	Carpal tunnel syndrome	Weighted mode	12	-0.0128112	0.0345821	0.718077	-0.080592	0.0549697	0.987271	0.92257	1.05651					1
224	Cathepsin F	Carpal tunnel syndrome	Maximum likelihood	12	-0.00930312	0.0211749	0.660411	-0.050806	0.0321997	0.99074	0.950463	1.03272					0.966601
225	Cathepsin G	Carpal tunnel syndrome	Inverse variance weighted	15	0.0100197	0.0265766	0.706165	-0.0420705	0.0621099	1.01007	0.958802	1.06408	22.8206	0.231385	0.637239	0.263	1
226	Cathepsin G	Carpal tunnel syndrome	MR Egger	15	0.0335791	0.055929	0.558569	-0.0760418	0.1432	1.03415	0.926778	1.15396		0.191457			1
227	Cathepsin G	Carpal tunnel syndrome	Weighted median	15	0.0275881	0.0338746	0.415405	-0.0388062	0.0939824	1.02797	0.961937	1.09854					1
228	Cathepsin G	Carpal tunnel syndrome	Simple mode	15	0.0716527	0.0546449	0.210876	-0.0354514	0.178757	1.07428	0.96517	1.19573					1
229	Cathepsin G	Carpal tunnel syndrome	Weighted mode	15	0.0522391	0.0459452	0.274631	-0.0378135	0.142292	1.05363	0.962892	1.15291					0.998657
230	Cathepsin G	Carpal tunnel syndrome	Maximum likelihood	15	0.0106965	0.0243494	0.66045	-0.0370283	0.0584213	1.01075	0.963649	1.06016					0.95795
231	Cathepsin E	Carpal tunnel syndrome	Inverse variance weighted	11	-0.0391511	0.0300906	0.193222	-0.0981287	0.0198265	0.961605	0.906532	1.02002	21.9151	0.170373	0.175141	0.192	0.864134
232	Cathepsin E	Carpal tunnel syndrome	MR Egger	11	-0.105861	0.0535267	0.079349	-0.210774	-0.000949043	0.899549	0.809957	0.999051		0.253738			1
233	Cathepsin E	Carpal tunnel syndrome	Weighted median	11	-0.0421346	0.0381732	0.269691	-0.116954	0.0326849	0.958741	0.889626	1.03322					1
234	Cathepsin E	Carpal tunnel syndrome	Simple mode	11	-0.112316	0.0739514	0.15978	-0.257261	0.0326287	0.893762	0.773166	1.03317					1
235	Cathepsin E	Carpal tunnel syndrome	Weighted mode	11	-0.104006	0.0549427	0.0876286	-0.211694	0.00368145	0.90122	0.809212	1.00369					1
236	Cathepsin E	Carpal tunnel syndrome	Maximum likelihood	11	-0.0410159	0.0260424	0.115264	-0.0920591	0.0100272	0.959814	0.912051	1.01008					0.598629
237	Cathepsin H	Carpal tunnel syndrome	Inverse variance weighted	11	0.0105674	0.0130935	0.419627	-0.015096	0.0362307	1.01062	0.985017	1.0369	126.485	0.542929	0.675699	0.703	1
238	Cathepsin H	Carpal tunnel syndrome	MR Egger	11	0.0159453	0.0180611	0.400282	-0.0194544	0.051345	1.01607	0.980734	1.05269		0.465472			1
239	Cathepsin H	Carpal tunnel syndrome	Weighted median	11	0.00957874	0.0141117	0.497277	-0.0180802	0.0372377	1.00962	0.982082	1.03794					1
240	Cathepsin H	Carpal tunnel syndrome	Simple mode	11	-0.0142586	0.0358724	0.699365	-0.0845684	0.0560513	0.985843	0.918909	1.05765					1
241	Cathepsin H	Carpal tunnel syndrome	Weighted mode	11	0.0085449	0.0146462	0.572533	-0.0201617	0.0372515	1.00858	0.98004	1.03795					1
242	Cathepsin H	Carpal tunnel syndrome	Maximum likelihood	11	0.0105844	0.013141	0.42056	-0.0151719	0.0363407	1.01064	0.984943	1.03701					0.953664
243	Cathepsin O	Carpal tunnel syndrome	Inverse variance weighted	12	0.0474651	0.0268902	0.0775395	-0.00523971	0.10017	1.04861	0.994774	1.10536	23.2138	0.782545	0.634117	0.817	0.832257
244	Cathepsin O	Carpal tunnel syndrome	MR Egger	12	0.0195854	0.0628413	0.761696	-0.103584	0.142754	1.01978	0.901601	1.15345		0.729171			2
245	Cathepsin O	Carpal tunnel syndrome	Weighted median	12	0.066736	0.0364748	0.0673031	-0.00475468	0.138227	1.06901	0.995257	1.14824					0.673031
246	Cathepsin O	Carpal tunnel syndrome	Simple mode	12	0.0770695	0.0570635	0.203956	-0.034775	0.188914	1.08012	0.965823	1.20794					1
247	Cathepsin O	Carpal tunnel syndrome	Weighted mode	12	0.0673851	0.0519846	0.221425	-0.0345047	0.169275	1.06971	0.966084	1.18445					1
248	Cathepsin O	Carpal tunnel syndrome	Maximum likelihood	12	0.048486	0.0274137	0.0769481	-0.00524492	0.102217	1.04968	0.994769	1.10762					0.589935
249	Cathepsin S	Carpal tunnel syndrome	Inverse variance weighted	24	-0.0471691	0.0150397	0.00171087	-0.0766469	-0.0176913	0.953926	0.926217	0.982464	39.7152	0.570752	0.717354	0.637	0.137725
250	Cathepsin S	Carpal tunnel syndrome	MR Egger	24	-0.0547027	0.0254614	0.0429439	-0.104607	-0.00479834	0.946767	0.900678	0.995213		0.518588			0.981574
251	Cathepsin S	Carpal tunnel syndrome	Weighted median	24	-0.0537115	0.0226078	0.0175112	-0.0980229	-0.00940019	0.947705	0.906628	0.990644					1
252	Cathepsin S	Carpal tunnel syndrome	Simple mode	24	-0.0490891	0.0420053	0.254519	-0.131419	0.0332412	0.952096	0.87685	1.0338					1
253	Cathepsin S	Carpal tunnel syndrome	Weighted mode	24	-0.052456	0.0209652	0.0199036	-0.0935477	-0.0113643	0.948896	0.910695	0.9887					1
254	Cathepsin S	Carpal tunnel syndrome	Maximum likelihood	24	-0.0473476	0.01533	0.00201124	-0.0773943	-0.0173009	0.953756	0.925525	0.982848					0.161905
255	Cathepsin L2	Carpal tunnel syndrome	Inverse variance weighted	11	0.0114615	0.047716	0.810173	-0.0820619	0.104985	1.01153	0.921215	1.11069	24.6843	0.000799734	0.843315	0.64	0.973417
256	Cathepsin L2	Carpal tunnel syndrome	MR Egger	11	-0.0109885	0.121225	0.92976	-0.24859	0.226613	0.989072	0.7799	1.25434		0.000431191			0.978694
257	Cathepsin L2	Carpal tunnel syndrome	Weighted median	11	0.0451836	0.0462869	0.328983	-0.0455387	0.135906	1.04622	0.955483	1.14557					1
258	Cathepsin L2	Carpal tunnel syndrome	Simple mode	11	0.116645	0.107767	0.304491	-0.0945781	0.327868	1.12372	0.909757	1.38801					1
259	Cathepsin L2	Carpal tunnel syndrome	Weighted mode	11	0.125972	0.0810105	0.150996	-0.0328084	0.284753	1.13425	0.967724	1.32943					1
260	Cathepsin L2	Carpal tunnel syndrome	Maximum likelihood	11	0.0130363	0.0293504	0.656926	-0.0444905	0.0705632	1.01312	0.956485	1.07311					0.979307
261	Cathepsin Z	Carpal tunnel syndrome	Inverse variance weighted	13	0.0103806	0.0216667	0.631864	-0.032086	0.0528472	1.01043	0.968423	1.05427	53.4584	0.129342	0.968306	0.175	1
262	Cathepsin Z	Carpal tunnel syndrome	MR Egger	13	0.00926156	0.0356372	0.799753	-0.0605873	0.0791104	1.0093	0.941212	1.08232		0.0921446			0.984311
263	Cathepsin Z	Carpal tunnel syndrome	Weighted median	13	-0.00244098	0.0259107	0.924944	-0.0532259	0.0483439	0.997562	0.948166	1.04953					1
264	Cathepsin Z	Carpal tunnel syndrome	Simple mode	13	-0.0372946	0.0404827	0.375072	-0.116641	0.0420516	0.963392	0.889905	1.04295					1
265	Cathepsin Z	Carpal tunnel syndrome	Weighted mode	13	-0.0102169	0.0273775	0.715519	-0.0638769	0.043443	0.989835	0.938121	1.0444					1
266	Cathepsin Z	Carpal tunnel syndrome	Maximum likelihood	13	0.0108123	0.01813	0.550924	-0.0247225	0.0463471	1.01087	0.975581	1.04744					1
267	Cathepsin B	Benign tumors of bone and articular cartilage	Inverse variance weighted	17	-0.470262	0.254963	0.0651202	-0.96999	0.0294656	0.624838	0.379087	1.0299	35.5021	0.541142	0.0206626	0.56	1
268	Cathepsin B	Benign tumors of bone and articular cartilage	MR Egger	17	-1.85322	0.592438	0.00690845	-3.0144	-0.692046	0.156731	0.0490752	0.500551		0.920225			0.552676
269	Cathepsin B	Benign tumors of bone and articular cartilage	Weighted median	17	-0.744482	0.357801	0.0374599	-1.44577	-0.0431924	0.47498	0.235564	0.957727					0.599358
270	Cathepsin B	Benign tumors of bone and articular cartilage	Simple mode	17	-0.845991	0.56821	0.155967	-1.95968	0.267701	0.429132	0.140903	1.30696					1
271	Cathepsin B	Benign tumors of bone and articular cartilage	Weighted mode	17	-0.803158	0.404805	0.0646765	-1.59658	-0.00973964	0.447912	0.202589	0.990308					1
272	Cathepsin B	Benign tumors of bone and articular cartilage	Maximum likelihood	17	-0.461665	0.258825	0.074473	-0.968962	0.0456317	0.630233	0.379477	1.04669					0.666119
273	Cathepsin F	Benign tumors of bone and articular cartilage	Inverse variance weighted	12	0.157394	0.292642	0.590689	-0.416185	0.730972	1.17046	0.659559	2.0771	36.6058	0.290298	0.929106	0.245	1
274	Cathepsin F	Benign tumors of bone and articular cartilage	MR Egger	12	0.0980856	0.718807	0.894169	-1.31078	1.50695	1.10306	0.269611	4.51294		0.221687			1
275	Cathepsin F	Benign tumors of bone and articular cartilage	Weighted median	12	0.105492	0.406042	0.795014	-0.69035	0.901334	1.11126	0.5014	2.46289					1
276	Cathepsin F	Benign tumors of bone and articular cartilage	Simple mode	12	-0.50203	0.735047	0.508742	-1.94272	0.938663	0.605301	0.143313	2.55656					1
277	Cathepsin F	Benign tumors of bone and articular cartilage	Weighted mode	12	-0.568188	0.840156	0.512826	-2.21489	1.07852	0.566551	0.109165	2.94032					1
278	Cathepsin F	Benign tumors of bone and articular cartilage	Maximum likelihood	12	0.161827	0.2733	0.553768	-0.37384	0.697495	1.17566	0.688087	2.00871					0.979743
279	Cathepsin G	Benign tumors of bone and articular cartilage	Inverse variance weighted	13	0.0759868	0.304177	0.802733	-0.520199	0.672173	1.07895	0.594402	1.95849	22.9823	0.680766	0.943133	0.697	0.97173
280	Cathepsin G	Benign tumors of bone and articular cartilage	MR Egger	13	0.0392071	0.588658	0.948092	-1.11456	1.19298	1.03999	0.328059	3.29688		0.598598			0.960093
281	Cathepsin G	Benign tumors of bone and articular cartilage	Weighted median	13	0.494943	0.417324	0.235625	-0.323012	1.3129	1.6404	0.723965	3.71693					1
282	Cathepsin G	Benign tumors of bone and articular cartilage	Simple mode	13	0.47642	0.678163	0.49576	-0.852779	1.80562	1.6103	0.426229	6.08373					1
283	Cathepsin G	Benign tumors of bone and articular cartilage	Weighted mode	13	0.521635	0.442191	0.260994	-0.34506	1.38833	1.68478	0.708178	4.00815					1
284	Cathepsin G	Benign tumors of bone and articular cartilage	Maximum likelihood	13	0.0786589	0.308108	0.798494	-0.525232	0.68255	1.08184	0.591418	1.97892					0.966598
285	Cathepsin E	Benign tumors of bone and articular cartilage	Inverse variance weighted	10	-0.228501	0.288914	0.429004	-0.794773	0.33777	0.795725	0.451684	1.40182	21.973	0.388943	0.378195	0.407	1
286	Cathepsin E	Benign tumors of bone and articular cartilage	MR Egger	10	0.135734	0.48698	0.787524	-0.818746	1.09021	1.14538	0.440984	2.97491		0.376742			1
287	Cathepsin E	Benign tumors of bone and articular cartilage	Weighted median	10	-0.0878683	0.404008	0.827825	-0.879724	0.703988	0.915881	0.414897	2.0218					1
288	Cathepsin E	Benign tumors of bone and articular cartilage	Simple mode	10	0.399277	0.582269	0.510162	-0.74197	1.54052	1.49075	0.476175	4.66703					1
289	Cathepsin E	Benign tumors of bone and articular cartilage	Weighted mode	10	0.116158	0.454011	0.80382	-0.773704	1.00602	1.12317	0.461301	2.73469					0.974327
290	Cathepsin E	Benign tumors of bone and articular cartilage	Maximum likelihood	10	-0.238645	0.288683	0.408425	-0.804463	0.327173	0.787695	0.447328	1.38704					0.967006
291	Cathepsin H	Benign tumors of bone and articular cartilage	Inverse variance weighted	11	-0.0809943	0.170676	0.635108	-0.41552	0.253531	0.922199	0.659997	1.28857	126.485	0.571816	0.370222	0.737	1
292	Cathepsin H	Benign tumors of bone and articular cartilage	MR Egger	11	0.0707742	0.234571	0.769723	-0.388985	0.530533	1.07334	0.677745	1.69984		0.56503			1
293	Cathepsin H	Benign tumors of bone and articular cartilage	Weighted median	11	-0.0820051	0.190593	0.667004	-0.455568	0.291557	0.921267	0.634088	1.33851					1
294	Cathepsin H	Benign tumors of bone and articular cartilage	Simple mode	11	0.278285	0.495191	0.586507	-0.69229	1.24886	1.32086	0.500429	3.48637					1
295	Cathepsin H	Benign tumors of bone and articular cartilage	Weighted mode	11	-0.0684036	0.184073	0.717935	-0.429186	0.292379	0.933884	0.651039	1.33961					1
296	Cathepsin H	Benign tumors of bone and articular cartilage	Maximum likelihood	11	-0.0802424	0.17126	0.639397	-0.415912	0.255427	0.922893	0.659739	1.29101					0.980409
297	Cathepsin O	Benign tumors of bone and articular cartilage	Inverse variance weighted	12	0.184197	0.342909	0.591157	-0.487904	0.856298	1.20225	0.613912	2.35443	23.2138	0.675635	0.403879	0.673	1
298	Cathepsin O	Benign tumors of bone and articular cartilage	MR Egger	12	-0.434474	0.788318	0.593636	-1.97958	1.11063	0.647605	0.138128	3.03627		0.662373			1
299	Cathepsin O	Benign tumors of bone and articular cartilage	Weighted median	12	0.499729	0.467722	0.285326	-0.417006	1.41646	1.64827	0.659017	4.12252					0.992439
300	Cathepsin O	Benign tumors of bone and articular cartilage	Simple mode	12	0.982318	0.707357	0.192395	-0.404101	2.36874	2.67064	0.667576	10.6839					1
301	Cathepsin O	Benign tumors of bone and articular cartilage	Weighted mode	12	0.916507	0.676254	0.202507	-0.40895	2.24196	2.50054	0.664347	9.4118					1
302	Cathepsin O	Benign tumors of bone and articular cartilage	Maximum likelihood	12	0.190792	0.349861	0.585523	-0.494936	0.876519	1.21021	0.60961	2.40252					0.952214
303	Cathepsin S	Benign tumors of bone and articular cartilage	Inverse variance weighted	24	-0.0788573	0.215854	0.714868	-0.501932	0.344217	0.924172	0.60536	1.41089	39.7152	0.426139	0.110356	0.41	1
304	Cathepsin S	Benign tumors of bone and articular cartilage	MR Egger	24	-0.575898	0.366963	0.130836	-1.29515	0.14335	0.5622	0.273858	1.15413		0.531036			1
305	Cathepsin S	Benign tumors of bone and articular cartilage	Weighted median	24	-0.297931	0.30404	0.327132	-0.893851	0.297988	0.742352	0.409078	1.34715					1
306	Cathepsin S	Benign tumors of bone and articular cartilage	Simple mode	24	0.28402	0.600613	0.640753	-0.89318	1.46122	1.32846	0.409352	4.31122					1
307	Cathepsin S	Benign tumors of bone and articular cartilage	Weighted mode	24	-0.369571	0.328038	0.271525	-1.01253	0.273384	0.691031	0.3633	1.3144					1
308	Cathepsin S	Benign tumors of bone and articular cartilage	Maximum likelihood	24	-0.0806419	0.216265	0.709235	-0.504522	0.343238	0.922524	0.603794	1.4095					0.959553
309	Cathepsin L2	Benign tumors of bone and articular cartilage	Inverse variance weighted	11	0.297606	0.397987	0.454594	-0.482449	1.07766	1.34663	0.61727	2.9378	24.6843	0.392556	0.695856	0.431	1
310	Cathepsin L2	Benign tumors of bone and articular cartilage	MR Egger	11	-0.128449	1.13432	0.912326	-2.35171	2.09481	0.879458	0.095206	8.12393		0.320974			0.99981
311	Cathepsin L2	Benign tumors of bone and articular cartilage	Weighted median	11	0.133148	0.541541	0.805784	-0.928272	1.19457	1.14242	0.395236	3.30213					1
312	Cathepsin L2	Benign tumors of bone and articular cartilage	Simple mode	11	-0.441154	0.887468	0.62987	-2.18059	1.29828	0.643293	0.112975	3.663					1
313	Cathepsin L2	Benign tumors of bone and articular cartilage	Weighted mode	11	0.438165	0.688221	0.538644	-0.910748	1.78708	1.54986	0.402223	5.97198					1
314	Cathepsin L2	Benign tumors of bone and articular cartilage	Maximum likelihood	11	0.309785	0.395314	0.43325	-0.46503	1.0846	1.36313	0.628116	2.95826					0.955523
315	Cathepsin Z	Benign tumors of bone and articular cartilage	Inverse variance weighted	13	0.035499	0.24192	0.883339	-0.438665	0.509663	1.03614	0.644897	1.66473	53.4584	0.462046	0.65586	0.386	0.987622
316	Cathepsin Z	Benign tumors of bone and articular cartilage	MR Egger	13	0.176348	0.395179	0.664075	-0.598204	0.9509	1.19285	0.549798	2.58804		0.396255			1
317	Cathepsin Z	Benign tumors of bone and articular cartilage	Weighted median	13	-0.0055183	0.356944	0.987665	-0.705128	0.694091	0.994497	0.494046	2.00189					1
318	Cathepsin Z	Benign tumors of bone and articular cartilage	Simple mode	13	0.204184	0.628287	0.750788	-1.02726	1.43563	1.22652	0.357987	4.20228					1
319	Cathepsin Z	Benign tumors of bone and articular cartilage	Weighted mode	13	0.127679	0.420587	0.766653	-0.696672	0.952029	1.13619	0.498241	2.59096					1
320	Cathepsin Z	Benign tumors of bone and articular cartilage	Maximum likelihood	13	0.0364833	0.244481	0.881374	-0.442699	0.515665	1.03716	0.642301	1.67475					0.971926
321	Cathepsin B	Benign tumors: skull and facial bones	Inverse variance weighted	17	0.0313329	0.228088	0.890737	-0.41572	0.478385	1.03183	0.659865	1.61347	35.5021	0.677744	0.217624	0.667	0.968977
322	Cathepsin B	Benign tumors: skull and facial bones	MR Egger	17	-0.585232	0.53062	0.287443	-1.62525	0.454784	0.556977	0.196863	1.57583		0.73283			1
323	Cathepsin B	Benign tumors: skull and facial bones	Weighted median	17	-0.167477	0.318166	0.598623	-0.791083	0.456129	0.845796	0.453354	1.57795					0.997706
324	Cathepsin B	Benign tumors: skull and facial bones	Simple mode	17	0.223417	0.549698	0.689807	-0.853991	1.30083	1.25034	0.425712	3.67233					1
325	Cathepsin B	Benign tumors: skull and facial bones	Weighted mode	17	-0.252088	0.370796	0.506314	-0.978848	0.474672	0.777176	0.375744	1.60749					1
326	Cathepsin B	Benign tumors: skull and facial bones	Maximum likelihood	17	0.0321821	0.230665	0.88904	-0.419921	0.484285	1.03271	0.657099	1.62301					0.967131
327	Cathepsin F	Benign tumors: skull and facial bones	Inverse variance weighted	12	-0.370885	0.234596	0.113888	-0.830693	0.0889225	0.690123	0.435747	1.093	36.6058	0.840354	0.899009	0.835	0.733442
328	Cathepsin F	Benign tumors: skull and facial bones	MR Egger	12	-0.435755	0.550782	0.447211	-1.51529	0.643779	0.646776	0.219745	1.90366		0.776012			1
329	Cathepsin F	Benign tumors: skull and facial bones	Weighted median	12	-0.222237	0.309657	0.47295	-0.829165	0.384691	0.800726	0.436414	1.46916					1
330	Cathepsin F	Benign tumors: skull and facial bones	Simple mode	12	-0.113351	0.495554	0.823271	-1.08464	0.857934	0.892837	0.338025	2.35828					1
331	Cathepsin F	Benign tumors: skull and facial bones	Weighted mode	12	-0.0849824	0.435978	0.849006	-0.9395	0.769535	0.918528	0.390823	2.15876					0.963412
332	Cathepsin F	Benign tumors: skull and facial bones	Maximum likelihood	12	-0.367521	0.237	0.120969	-0.832042	0.0969995	0.692449	0.43516	1.10186					0.608624
333	Cathepsin G	Benign tumors: skull and facial bones	Inverse variance weighted	13	-0.0528013	0.26511	0.842132	-0.572417	0.466814	0.948568	0.56416	1.59491	22.9823	0.55722	0.380116	0.519	0.989658
334	Cathepsin G	Benign tumors: skull and facial bones	MR Egger	13	0.34755	0.511839	0.511159	-0.655655	1.35075	1.41559	0.519102	3.86034		0.54521			1
335	Cathepsin G	Benign tumors: skull and facial bones	Weighted median	13	0.327522	0.354802	0.355948	-0.367889	1.02293	1.38753	0.692194	2.78134					1
336	Cathepsin G	Benign tumors: skull and facial bones	Simple mode	13	-0.222989	0.535634	0.684533	-1.27283	0.826852	0.800123	0.280038	2.28611					1
337	Cathepsin G	Benign tumors: skull and facial bones	Weighted mode	13	0.241298	0.391504	0.549187	-0.52605	1.00865	1.2729	0.590935	2.74188					1
338	Cathepsin G	Benign tumors: skull and facial bones	Maximum likelihood	13	-0.055073	0.271309	0.839143	-0.586839	0.476693	0.946416	0.556082	1.61074					0.971957
339	Cathepsin E	Benign tumors: skull and facial bones	Inverse variance weighted	10	-0.45008	0.24498	0.0661783	-0.930241	0.0300801	0.637577	0.394459	1.03054	21.973	0.459223	0.746308	0.555	1
340	Cathepsin E	Benign tumors: skull and facial bones	MR Egger	10	-0.335546	0.426383	0.453986	-1.17126	0.500166	0.714948	0.309977	1.64899		0.37321			1
341	Cathepsin E	Benign tumors: skull and facial bones	Weighted median	10	-0.430714	0.339082	0.204001	-1.09531	0.233887	0.650045	0.334435	1.2635					0.932575
342	Cathepsin E	Benign tumors: skull and facial bones	Simple mode	10	-0.485336	0.44372	0.302457	-1.35503	0.384355	0.61549	0.25794	1.46867					1
343	Cathepsin E	Benign tumors: skull and facial bones	Weighted mode	10	-0.456815	0.37914	0.258978	-1.19993	0.2863	0.633297	0.301215	1.33149					1
344	Cathepsin E	Benign tumors: skull and facial bones	Maximum likelihood	10	-0.45637	0.251187	0.0692396	-0.948696	0.0359566	0.63358	0.387246	1.03661					0.696723
345	Cathepsin H	Benign tumors: skull and facial bones	Inverse variance weighted	11	-0.0881463	0.151717	0.561246	-0.385512	0.209219	0.915627	0.680102	1.23272	126.485	0.410258	0.771608	0.563	1
346	Cathepsin H	Benign tumors: skull and facial bones	MR Egger	11	-0.0432467	0.218744	0.847669	-0.471985	0.385492	0.957675	0.623763	1.47034		0.3307			0.997258
347	Cathepsin H	Benign tumors: skull and facial bones	Weighted median	11	-0.0500887	0.163452	0.759268	-0.370455	0.270278	0.951145	0.69042	1.31033					1
348	Cathepsin H	Benign tumors: skull and facial bones	Simple mode	11	-0.217193	0.45541	0.643671	-1.1098	0.67541	0.804774	0.329626	1.96484					1
349	Cathepsin H	Benign tumors: skull and facial bones	Weighted mode	11	-0.0422464	0.156985	0.793315	-0.349938	0.265445	0.958634	0.704732	1.30401					0.991644
350	Cathepsin H	Benign tumors: skull and facial bones	Maximum likelihood	11	-0.0888611	0.149707	0.552802	-0.382287	0.204564	0.914973	0.6823	1.22699					0.988901
351	Cathepsin O	Benign tumors: skull and facial bones	Inverse variance weighted	12	0.403334	0.298355	0.17642	-0.181441	0.98811	1.49681	0.834067	2.68615	23.2138	0.723915	0.697481	0.744	0.835401
352	Cathepsin O	Benign tumors: skull and facial bones	MR Egger	12	0.649425	0.683585	0.364494	-0.690403	1.98925	1.91444	0.501374	7.31007		0.656069			1
353	Cathepsin O	Benign tumors: skull and facial bones	Weighted median	12	0.562088	0.415826	0.176459	-0.252931	1.37711	1.75433	0.776521	3.96342					0.882296
354	Cathepsin O	Benign tumors: skull and facial bones	Simple mode	12	-0.516772	0.629668	0.429241	-1.75092	0.717378	0.596443	0.173614	2.04905					1
355	Cathepsin O	Benign tumors: skull and facial bones	Weighted mode	12	1.05625	0.629405	0.121465	-0.177385	2.28988	2.87556	0.837457	9.87377					1
356	Cathepsin O	Benign tumors: skull and facial bones	Maximum likelihood	12	0.416669	0.30351	0.169804	-0.17821	1.01155	1.5169	0.836766	2.74986					0.700984
357	Cathepsin S	Benign tumors: skull and facial bones	Inverse variance weighted	24	0.0503157	0.185321	0.786003	-0.312914	0.413546	1.0516	0.731313	1.51217	39.7152	0.53651	0.386836	0.474	0.996428
358	Cathepsin S	Benign tumors: skull and facial bones	MR Egger	24	0.278805	0.318305	0.390546	-0.345074	0.902684	1.32155	0.708168	2.46621		0.52371			1
359	Cathepsin S	Benign tumors: skull and facial bones	Weighted median	24	0.388862	0.2748	0.157047	-0.149746	0.927471	1.4753	0.860926	2.52811					0.897413
360	Cathepsin S	Benign tumors: skull and facial bones	Simple mode	24	0.644418	0.66746	0.344348	-0.663803	1.95264	1.90488	0.514889	7.04726					1
361	Cathepsin S	Benign tumors: skull and facial bones	Weighted mode	24	0.485754	0.281616	0.0979644	-0.0662143	1.03772	1.6254	0.93593	2.82278					1
362	Cathepsin S	Benign tumors: skull and facial bones	Maximum likelihood	24	0.051907	0.188449	0.782975	-0.317452	0.421266	1.05328	0.728001	1.52389					0.962283
363	Cathepsin L2	Benign tumors: skull and facial bones	Inverse variance weighted	11	0.589635	0.337042	0.0802153	-0.0709682	1.25024	1.80333	0.931492	3.49117	24.6843	0.88281	0.683752	0.882	0.759686
364	Cathepsin L2	Benign tumors: skull and facial bones	MR Egger	11	0.948957	0.91796	0.328223	-0.850245	2.74816	2.58301	0.42731	15.6139		0.838997			1
365	Cathepsin L2	Benign tumors: skull and facial bones	Weighted median	11	0.465309	0.433	0.282547	-0.383371	1.31399	1.59251	0.68156	3.72099					1
366	Cathepsin L2	Benign tumors: skull and facial bones	Simple mode	11	-0.00808301	0.672457	0.990646	-1.3261	1.30993	0.99195	0.265511	3.70593					1
367	Cathepsin L2	Benign tumors: skull and facial bones	Weighted mode	11	0.396994	0.562416	0.496382	-0.705341	1.49933	1.48735	0.49394	4.47868					1
368	Cathepsin L2	Benign tumors: skull and facial bones	Maximum likelihood	11	0.603411	0.343807	0.0792447	-0.0704511	1.27727	1.82835	0.931973	3.58685					0.579927
369	Cathepsin Z	Benign tumors: skull and facial bones	Inverse variance weighted	13	-0.476723	0.23066	0.0387551	-0.928817	-0.0246294	0.620814	0.395021	0.975671	53.4584	0.291571	0.304906	0.379	1
370	Cathepsin Z	Benign tumors: skull and facial bones	MR Egger	13	-0.166069	0.368575	0.66105	-0.888476	0.556337	0.846988	0.411282	1.74427		0.306779			1
371	Cathepsin Z	Benign tumors: skull and facial bones	Weighted median	13	-0.50944	0.274973	0.0639264	-1.04839	0.0295066	0.600832	0.350503	1.02995					0.681882
372	Cathepsin Z	Benign tumors: skull and facial bones	Simple mode	13	-0.470477	0.424326	0.289259	-1.30216	0.361202	0.624704	0.271945	1.43505					1
373	Cathepsin Z	Benign tumors: skull and facial bones	Weighted mode	13	-0.459032	0.291058	0.140753	-1.02951	0.111443	0.631895	0.357183	1.11789					1
374	Cathepsin Z	Benign tumors: skull and facial bones	Maximum likelihood	13	-0.486933	0.215592	0.0239089	-0.909492	-0.0643735	0.614508	0.402729	0.937655					0.769866
375	Cathepsin B	Benign tumor: Long bones of the lower limbs	Inverse variance weighted	17	-0.147154	0.119094	0.216602	-0.380577	0.0862696	0.863161	0.683467	1.0901	35.5021	0.797478	0.490799	0.829	0.871822
376	Cathepsin B	Benign tumor: Long bones of the lower limbs	MR Egger	17	-0.324001	0.27725	0.260794	-0.867411	0.21941	0.72325	0.420038	1.24534		0.774029			1
377	Cathepsin B	Benign tumor: Long bones of the lower limbs	Weighted median	17	-0.134416	0.173197	0.437695	-0.473882	0.205049	0.874226	0.622581	1.22759					1
378	Cathepsin B	Benign tumor: Long bones of the lower limbs	Simple mode	17	0.0289723	0.30483	0.92546	-0.568494	0.626439	1.0294	0.566378	1.87094					1
379	Cathepsin B	Benign tumor: Long bones of the lower limbs	Weighted mode	17	-0.108633	0.20142	0.597083	-0.503417	0.286151	0.89706	0.604462	1.33129					1
380	Cathepsin B	Benign tumor: Long bones of the lower limbs	Maximum likelihood	17	-0.147951	0.120738	0.220428	-0.384598	0.0886952	0.862473	0.680724	1.09275					0.771498
381	Cathepsin F	Benign tumor: Long bones of the lower limbs	Inverse variance weighted	12	0.1337	0.129963	0.303597	-0.121028	0.388427	1.14305	0.886009	1.47466	36.6058	0.345303	0.143039	0.352	0.997533
382	Cathepsin F	Benign tumor: Long bones of the lower limbs	MR Egger	12	0.547607	0.288064	0.086481	-0.0169984	1.11221	1.72911	0.983145	3.04108		0.465262			1
383	Cathepsin F	Benign tumor: Long bones of the lower limbs	Weighted median	12	0.336053	0.16206	0.0381133	0.0184156	0.65369	1.39941	1.01859	1.92262					0.554375
384	Cathepsin F	Benign tumor: Long bones of the lower limbs	Simple mode	12	0.198138	0.260778	0.463351	-0.312988	0.709264	1.21913	0.731259	2.03249					1
385	Cathepsin F	Benign tumor: Long bones of the lower limbs	Weighted mode	12	0.310365	0.20134	0.151456	-0.0842613	0.704992	1.36392	0.919191	2.02383					1
386	Cathepsin F	Benign tumor: Long bones of the lower limbs	Maximum likelihood	12	0.138149	0.125033	0.269204	-0.106916	0.383215	1.14815	0.898601	1.46699					0.802626
387	Cathepsin G	Benign tumor: Long bones of the lower limbs	Inverse variance weighted	13	-0.174261	0.141266	0.217364	-0.451141	0.10262	0.840078	0.636901	1.10807	22.9823	0.415105	0.586988	0.503	0.85355
388	Cathepsin G	Benign tumor: Long bones of the lower limbs	MR Egger	13	-0.309513	0.282118	0.296032	-0.862465	0.243439	0.733804	0.42212	1.27563		0.360318			1
389	Cathepsin G	Benign tumor: Long bones of the lower limbs	Weighted median	13	-0.156239	0.199981	0.434642	-0.548201	0.235723	0.855354	0.577988	1.26582					1
390	Cathepsin G	Benign tumor: Long bones of the lower limbs	Simple mode	13	-0.345135	0.283685	0.247139	-0.901157	0.210887	0.708125	0.406099	1.23477					1
391	Cathepsin G	Benign tumor: Long bones of the lower limbs	Weighted mode	13	-0.162244	0.213501	0.461969	-0.580705	0.256217	0.850234	0.559504	1.29203					1
392	Cathepsin G	Benign tumor: Long bones of the lower limbs	Maximum likelihood	13	-0.174495	0.14332	0.223404	-0.455402	0.106411	0.839881	0.634193	1.11228					0.765279
393	Cathepsin E	Benign tumor: Long bones of the lower limbs	Inverse variance weighted	10	-0.23025	0.129841	0.0761765	-0.484739	0.0242395	0.794335	0.615858	1.02454	21.973	0.817886	0.506634	0.846	0.87603
394	Cathepsin E	Benign tumor: Long bones of the lower limbs	MR Egger	10	-0.351855	0.21785	0.144947	-0.778841	0.0751311	0.703382	0.458938	1.07803		0.788919			1
395	Cathepsin E	Benign tumor: Long bones of the lower limbs	Weighted median	10	-0.269598	0.173758	0.120766	-0.610164	0.0709685	0.763687	0.543262	1.07355					0.840109
396	Cathepsin E	Benign tumor: Long bones of the lower limbs	Simple mode	10	-0.285282	0.247551	0.27884	-0.770481	0.199918	0.751803	0.462791	1.2213					1
397	Cathepsin E	Benign tumor: Long bones of the lower limbs	Weighted mode	10	-0.289921	0.20539	0.191702	-0.692486	0.112643	0.748322	0.500331	1.11923					1
398	Cathepsin E	Benign tumor: Long bones of the lower limbs	Maximum likelihood	10	-0.228915	0.13096	0.0804688	-0.485597	0.0277672	0.795396	0.61533	1.02816					0.563281
399	Cathepsin H	Benign tumor: Long bones of the lower limbs	Inverse variance weighted	11	-0.126881	0.0779047	0.103383	-0.279574	0.0258123	0.880839	0.756106	1.02615	126.485	0.990628	0.880217	0.995	0.723682
400	Cathepsin H	Benign tumor: Long bones of the lower limbs	MR Egger	11	-0.138277	0.10711	0.228882	-0.348212	0.0716582	0.870857	0.705949	1.07429		0.981076			1
401	Cathepsin H	Benign tumor: Long bones of the lower limbs	Weighted median	11	-0.130839	0.0855299	0.126079	-0.298478	0.0367993	0.877359	0.741947	1.03748					0.806904
402	Cathepsin H	Benign tumor: Long bones of the lower limbs	Simple mode	11	-0.123756	0.205447	0.560335	-0.526433	0.278921	0.883595	0.590708	1.3217					1
403	Cathepsin H	Benign tumor: Long bones of the lower limbs	Weighted mode	11	-0.127933	0.0898407	0.184895	-0.30402	0.0481552	0.879913	0.737846	1.04933					1
404	Cathepsin H	Benign tumor: Long bones of the lower limbs	Maximum likelihood	11	-0.127032	0.0780483	0.103608	-0.280007	0.0259428	0.880706	0.755779	1.02628					0.575205
405	Cathepsin O	Benign tumor: Long bones of the lower limbs	Inverse variance weighted	12	-0.0166953	0.177237	0.924953	-0.364081	0.33069	0.983443	0.694835	1.39193	23.2138	0.235396	0.405089	0.226	0.986208
406	Cathepsin O	Benign tumor: Long bones of the lower limbs	MR Egger	12	-0.338953	0.411785	0.429627	-1.14605	0.468147	0.712516	0.317889	1.59703		0.225003			1
407	Cathepsin O	Benign tumor: Long bones of the lower limbs	Weighted median	12	-0.00309972	0.238533	0.989632	-0.470624	0.464424	0.996905	0.624613	1.5911					0.995856
408	Cathepsin O	Benign tumor: Long bones of the lower limbs	Simple mode	12	0.0607377	0.416777	0.886769	-0.756146	0.877622	1.06262	0.469472	2.40517					1
409	Cathepsin O	Benign tumor: Long bones of the lower limbs	Weighted mode	12	-0.118706	0.445103	0.794639	-0.991107	0.753695	0.888069	0.371166	2.12484					0.985599
410	Cathepsin O	Benign tumor: Long bones of the lower limbs	Maximum likelihood	12	-0.0180426	0.162536	0.911611	-0.336613	0.300528	0.982119	0.714185	1.35057					0.971982
411	Cathepsin S	Benign tumor: Long bones of the lower limbs	Inverse variance weighted	24	-0.0604441	0.0977419	0.536308	-0.252018	0.13113	0.941346	0.777231	1.14012	39.7152	0.515572	0.177591	0.422	1
412	Cathepsin S	Benign tumor: Long bones of the lower limbs	MR Egger	24	-0.251897	0.168665	0.149517	-0.582479	0.0786863	0.777325	0.558512	1.08186		0.57443			1
413	Cathepsin S	Benign tumor: Long bones of the lower limbs	Weighted median	24	-0.215205	0.134897	0.110637	-0.479603	0.0491921	0.806376	0.619029	1.05042					0.842951
414	Cathepsin S	Benign tumor: Long bones of the lower limbs	Simple mode	24	0.195721	0.268463	0.473335	-0.330467	0.72191	1.21619	0.718588	2.05836					1
415	Cathepsin S	Benign tumor: Long bones of the lower limbs	Weighted mode	24	-0.278268	0.140842	0.0603009	-0.554318	-0.00221716	0.757094	0.574464	0.997785					1
416	Cathepsin S	Benign tumor: Long bones of the lower limbs	Maximum likelihood	24	-0.0614935	0.0988607	0.533928	-0.25526	0.132274	0.940359	0.774715	1.14142					1
417	Cathepsin L2	Benign tumor: Long bones of the lower limbs	Inverse variance weighted	11	0.0611866	0.188452	0.745423	-0.308179	0.430552	1.0631	0.734784	1.53811	24.6843	0.338491	0.532441	0.334	0.975716
418	Cathepsin L2	Benign tumor: Long bones of the lower limbs	MR Egger	11	0.380657	0.529034	0.490074	-0.656249	1.41756	1.46325	0.518794	4.12705		0.293571			1
419	Cathepsin L2	Benign tumor: Long bones of the lower limbs	Weighted median	11	0.0913576	0.252821	0.717836	-0.404172	0.586887	1.09566	0.667529	1.79838					1
420	Cathepsin L2	Benign tumor: Long bones of the lower limbs	Simple mode	11	0.163637	0.402705	0.693049	-0.625666	0.95294	1.17779	0.534905	2.59332					1
421	Cathepsin L2	Benign tumor: Long bones of the lower limbs	Weighted mode	11	0.202132	0.336997	0.561981	-0.458382	0.862646	1.22401	0.632306	2.36942					1
422	Cathepsin L2	Benign tumor: Long bones of the lower limbs	Maximum likelihood	11	0.0638088	0.181334	0.724924	-0.291606	0.419223	1.06589	0.747063	1.52078					0.941232
423	Cathepsin Z	Benign tumor: Long bones of the lower limbs	Inverse variance weighted	13	-0.073529	0.119084	0.536935	-0.306934	0.159876	0.929109	0.735699	1.17337	53.4584	0.312893	0.397004	0.294	1
424	Cathepsin Z	Benign tumor: Long bones of the lower limbs	MR Egger	13	0.0576249	0.191303	0.768863	-0.31733	0.43258	1.05932	0.72809	1.54123		0.299857			1
425	Cathepsin Z	Benign tumor: Long bones of the lower limbs	Weighted median	13	0.00451753	0.158005	0.977191	-0.305173	0.314208	1.00453	0.736996	1.36917					1
426	Cathepsin Z	Benign tumor: Long bones of the lower limbs	Simple mode	13	-0.411017	0.296478	0.190863	-0.992114	0.170079	0.662975	0.370792	1.1854					1
427	Cathepsin Z	Benign tumor: Long bones of the lower limbs	Weighted mode	13	0.0994373	0.165823	0.559885	-0.225575	0.42445	1.10455	0.798057	1.52875					1
428	Cathepsin Z	Benign tumor: Long bones of the lower limbs	Maximum likelihood	13	-0.0756018	0.11212	0.500127	-0.295358	0.144154	0.927185	0.744265	1.15506					0.994079
429	Cathepsin B	Benign tumors: scapula and upper limb long bones	Inverse variance weighted	17	-0.0739157	0.22282	0.740094	-0.510642	0.362811	0.92875	0.60011	1.43736	35.5021	0.605034	0.354672	0.644	0.976681
430	Cathepsin B	Benign tumors: scapula and upper limb long bones	MR Egger	17	0.374062	0.519277	0.482385	-0.643722	1.39185	1.45363	0.525333	4.02227		0.602069			1
431	Cathepsin B	Benign tumors: scapula and upper limb long bones	Weighted median	17	-0.00241367	0.331728	0.994195	-0.6526	0.647772	0.997589	0.52069	1.91128					0.994195
432	Cathepsin B	Benign tumors: scapula and upper limb long bones	Simple mode	17	-0.688086	0.551913	0.23044	-1.76984	0.393663	0.502537	0.170361	1.4824					1
433	Cathepsin B	Benign tumors: scapula and upper limb long bones	Weighted mode	17	0.0334009	0.380303	0.931104	-0.711992	0.778794	1.03396	0.490666	2.17884					0.967381
434	Cathepsin B	Benign tumors: scapula and upper limb long bones	Maximum likelihood	17	-0.075869	0.225641	0.736691	-0.518125	0.366387	0.926938	0.595637	1.44251					0.933916
435	Cathepsin F	Benign tumors: scapula and upper limb long bones	Inverse variance weighted	12	0.468047	0.275421	0.0892461	-0.071778	1.00787	1.59687	0.930737	2.73976	36.6058	0.148995	0.734144	0.172	0.718431
436	Cathepsin F	Benign tumors: scapula and upper limb long bones	MR Egger	12	0.256156	0.671211	0.710718	-1.05942	1.57173	1.29195	0.346658	4.81497		0.111588			1
437	Cathepsin F	Benign tumors: scapula and upper limb long bones	Weighted median	12	0.431852	0.329204	0.189586	-0.213389	1.07709	1.54011	0.807842	2.93613					0.892171
438	Cathepsin F	Benign tumors: scapula and upper limb long bones	Simple mode	12	0.422853	0.652395	0.530181	-0.85584	1.70155	1.52631	0.424926	5.48242					1
439	Cathepsin F	Benign tumors: scapula and upper limb long bones	Weighted mode	12	0.422853	0.471979	0.389483	-0.502226	1.34793	1.52631	0.605182	3.84946					1
440	Cathepsin F	Benign tumors: scapula and upper limb long bones	Maximum likelihood	12	0.481454	0.236159	0.0414814	0.0185825	0.944325	1.61843	1.01876	2.57108					0.66785
441	Cathepsin G	Benign tumors: scapula and upper limb long bones	Inverse variance weighted	13	0.280995	0.259585	0.279039	-0.227791	0.789781	1.32445	0.796291	2.20291	22.9823	0.901177	0.153928	0.916	0.955857
442	Cathepsin G	Benign tumors: scapula and upper limb long bones	MR Egger	13	-0.380576	0.504014	0.466056	-1.36844	0.607292	0.683468	0.254503	1.83545		0.971708			1
443	Cathepsin G	Benign tumors: scapula and upper limb long bones	Weighted median	13	0.222162	0.354664	0.531052	-0.472979	0.917303	1.24877	0.623143	2.50253					1
444	Cathepsin G	Benign tumors: scapula and upper limb long bones	Simple mode	13	0.420057	0.524804	0.439034	-0.608559	1.44867	1.52205	0.544134	4.25746					1
445	Cathepsin G	Benign tumors: scapula and upper limb long bones	Weighted mode	13	0.284594	0.37829	0.466362	-0.456855	1.02604	1.32922	0.633272	2.79001					1
446	Cathepsin G	Benign tumors: scapula and upper limb long bones	Maximum likelihood	13	0.28964	0.263391	0.271483	-0.226608	0.805887	1.33595	0.797234	2.23868					0.794703
447	Cathepsin E	Benign tumors: scapula and upper limb long bones	Inverse variance weighted	10	-0.32683	0.339285	0.335402	-0.991829	0.338169	0.721206	0.370898	1.40238	21.973	0.0415685	0.798461	0.073	0.999995
448	Cathepsin E	Benign tumors: scapula and upper limb long bones	MR Egger	10	-0.454322	0.601348	0.471601	-1.63296	0.72432	0.634878	0.19535	2.06333		0.0267636			1
449	Cathepsin E	Benign tumors: scapula and upper limb long bones	Weighted median	10	-0.448188	0.33828	0.185204	-1.11122	0.214841	0.638785	0.329158	1.23967					0.897958
450	Cathepsin E	Benign tumors: scapula and upper limb long bones	Simple mode	10	-0.113282	0.507891	0.828481	-1.10875	0.882184	0.892898	0.329972	2.41617					1
451	Cathepsin E	Benign tumors: scapula and upper limb long bones	Weighted mode	10	-0.409203	0.36048	0.285633	-1.11574	0.297337	0.664179	0.327671	1.34627					0.993507
452	Cathepsin E	Benign tumors: scapula and upper limb long bones	Maximum likelihood	10	-0.342447	0.248982	0.16901	-0.830451	0.145557	0.710031	0.435853	1.15668					0.716071
453	Cathepsin H	Benign tumors: scapula and upper limb long bones	Inverse variance weighted	11	-0.288353	0.144584	0.046112	-0.571738	-0.00496886	0.749497	0.564544	0.995043	126.485	0.470025	0.256146	0.64	1
454	Cathepsin H	Benign tumors: scapula and upper limb long bones	MR Egger	11	-0.123091	0.198692	0.550941	-0.512527	0.266345	0.884183	0.59898	1.30519		0.514297			1
455	Cathepsin H	Benign tumors: scapula and upper limb long bones	Weighted median	11	-0.249342	0.156245	0.110524	-0.555582	0.0568975	0.779313	0.573738	1.05855					0.884189
456	Cathepsin H	Benign tumors: scapula and upper limb long bones	Simple mode	11	-0.0153193	0.414666	0.971257	-0.828065	0.797426	0.984797	0.436894	2.21982					1
457	Cathepsin H	Benign tumors: scapula and upper limb long bones	Weighted mode	11	-0.240709	0.157617	0.157707	-0.549638	0.0682207	0.786071	0.577159	1.0706					1
458	Cathepsin H	Benign tumors: scapula and upper limb long bones	Maximum likelihood	11	-0.289602	0.145362	0.0463407	-0.574512	-0.00469186	0.748562	0.56298	0.995319					0.678259
459	Cathepsin O	Benign tumors: scapula and upper limb long bones	Inverse variance weighted	12	-0.517191	0.295533	0.0801139	-1.09644	0.0620545	0.596193	0.33406	1.06402	23.2138	0.49925	0.757939	0.522	0.806147
460	Cathepsin O	Benign tumors: scapula and upper limb long bones	MR Egger	12	-0.31996	0.690788	0.653151	-1.6739	1.03398	0.726178	0.187514	2.81225		0.419124			1
461	Cathepsin O	Benign tumors: scapula and upper limb long bones	Weighted median	12	-0.369666	0.423561	0.382795	-1.19985	0.460514	0.690965	0.301241	1.58489					1
462	Cathepsin O	Benign tumors: scapula and upper limb long bones	Simple mode	12	-1.40705	0.725245	0.0784272	-2.82853	0.0144273	0.244864	0.0590995	1.01453					1
463	Cathepsin O	Benign tumors: scapula and upper limb long bones	Weighted mode	12	0.236529	0.684663	0.736259	-1.10541	1.57847	1.26684	0.331075	4.84752					1
464	Cathepsin O	Benign tumors: scapula and upper limb long bones	Maximum likelihood	12	-0.528666	0.303907	0.0819357	-1.12432	0.0669923	0.589391	0.324872	1.06929					0.549652
465	Cathepsin S	Benign tumors: scapula and upper limb long bones	Inverse variance weighted	24	0.174653	0.207469	0.399887	-0.231987	0.581292	1.19083	0.792956	1.78835	39.7152	0.166455	0.0661065	0.184	1
466	Cathepsin S	Benign tumors: scapula and upper limb long bones	MR Egger	24	0.709964	0.339251	0.048123	0.0450321	1.3749	2.03392	1.04606	3.95467		0.289731			0.962459
467	Cathepsin S	Benign tumors: scapula and upper limb long bones	Weighted median	24	0.383566	0.270795	0.156646	-0.147192	0.914325	1.46751	0.863128	2.49509					0.92827
468	Cathepsin S	Benign tumors: scapula and upper limb long bones	Simple mode	24	-0.448354	0.586496	0.452364	-1.59789	0.701179	0.638678	0.202324	2.01613					1
469	Cathepsin S	Benign tumors: scapula and upper limb long bones	Weighted mode	24	0.476229	0.293885	0.118764	-0.0997848	1.05224	1.60999	0.905032	2.86407					1
470	Cathepsin S	Benign tumors: scapula and upper limb long bones	Maximum likelihood	24	0.184534	0.18678	0.323166	-0.181556	0.550623	1.20266	0.833972	1.73433					0.912803
471	Cathepsin L2	Benign tumors: scapula and upper limb long bones	Inverse variance weighted	11	-0.270948	0.333246	0.416184	-0.92411	0.382213	0.762656	0.396884	1.46552	24.6843	0.910109	0.621513	0.917	1
472	Cathepsin L2	Benign tumors: scapula and upper limb long bones	MR Egger	11	0.162281	0.910637	0.862508	-1.62257	1.94713	1.17619	0.197391	7.00854		0.880011			1
473	Cathepsin L2	Benign tumors: scapula and upper limb long bones	Weighted median	11	-0.394233	0.41579	0.343051	-1.20918	0.420715	0.674197	0.298442	1.52305					1
474	Cathepsin L2	Benign tumors: scapula and upper limb long bones	Simple mode	11	-0.544682	0.6114	0.393924	-1.74303	0.653661	0.580026	0.17499	1.92257					1
475	Cathepsin L2	Benign tumors: scapula and upper limb long bones	Weighted mode	11	-0.459148	0.493451	0.374038	-1.42631	0.508016	0.631822	0.240193	1.66199					1
476	Cathepsin L2	Benign tumors: scapula and upper limb long bones	Maximum likelihood	11	-0.274916	0.336198	0.413516	-0.933864	0.384032	0.759636	0.393032	1.46819					0.951087
477	Cathepsin Z	Benign tumors: scapula and upper limb long bones	Inverse variance weighted	13	-0.149688	0.271046	0.58077	-0.680938	0.381562	0.860977	0.506142	1.46457	53.4584	0.0566097	0.942039	0.098	1
478	Cathepsin Z	Benign tumors: scapula and upper limb long bones	MR Egger	13	-0.123807	0.448507	0.787633	-1.00288	0.755267	0.88355	0.366821	2.12818		0.0379205			0.992293
479	Cathepsin Z	Benign tumors: scapula and upper limb long bones	Weighted median	13	-0.085819	0.283565	0.762162	-0.641607	0.469969	0.91776	0.526446	1.59994					1
480	Cathepsin Z	Benign tumors: scapula and upper limb long bones	Simple mode	13	0.106739	0.539683	0.846527	-0.95104	1.16452	1.11264	0.386339	3.20438					1
481	Cathepsin Z	Benign tumors: scapula and upper limb long bones	Weighted mode	13	-0.163343	0.281509	0.572486	-0.7151	0.388414	0.8493	0.489143	1.47464					1
482	Cathepsin Z	Benign tumors: scapula and upper limb long bones	Maximum likelihood	13	-0.161519	0.210228	0.442307	-0.573565	0.250528	0.850851	0.563513	1.2847					0.949485
483	Cathepsin B	Benign tumor: short bones of the lower limbs	Inverse variance weighted	17	-0.193112	0.23019	0.401513	-0.644285	0.258061	0.82439	0.525038	1.29442	35.5021	0.382033	0.310147	0.425	1
484	Cathepsin B	Benign tumor: short bones of the lower limbs	MR Egger	17	0.314277	0.534754	0.565475	-0.733841	1.36239	1.36927	0.480061	3.90553		0.38963			1
485	Cathepsin B	Benign tumor: short bones of the lower limbs	Weighted median	17	-0.239208	0.337276	0.478179	-0.900269	0.421853	0.787251	0.40646	1.52478					1
486	Cathepsin B	Benign tumor: short bones of the lower limbs	Simple mode	17	-0.164864	0.598291	0.786414	-1.33751	1.00779	0.848009	0.262497	2.73953					1
487	Cathepsin B	Benign tumor: short bones of the lower limbs	Weighted mode	17	-0.190099	0.407874	0.647445	-0.989532	0.609334	0.826877	0.37175	1.83921					1
488	Cathepsin B	Benign tumor: short bones of the lower limbs	Maximum likelihood	17	-0.189255	0.227159	0.404768	-0.634487	0.255978	0.827576	0.530207	1.29172					0.98739
489	Cathepsin F	Benign tumor: short bones of the lower limbs	Inverse variance weighted	12	-0.366412	0.228722	0.109155	-0.814707	0.0818818	0.693217	0.442769	1.08533	36.6058	0.819004	0.121266	0.817	0.732249
490	Cathepsin F	Benign tumor: short bones of the lower limbs	MR Egger	12	-1.18686	0.535797	0.0511144	-2.23702	-0.136699	0.305178	0.106776	0.872233		0.95251			0.817831
491	Cathepsin F	Benign tumor: short bones of the lower limbs	Weighted median	12	-0.58901	0.292447	0.044002	-1.16221	-0.015813	0.554877	0.312795	0.984311					0.586694
492	Cathepsin F	Benign tumor: short bones of the lower limbs	Simple mode	12	-0.719961	0.449817	0.137778	-1.6016	0.16168	0.486771	0.201573	1.17548					1
493	Cathepsin F	Benign tumor: short bones of the lower limbs	Weighted mode	12	-0.649448	0.381716	0.116929	-1.39761	0.0987157	0.522334	0.247187	1.10375					1
494	Cathepsin F	Benign tumor: short bones of the lower limbs	Maximum likelihood	12	-0.364023	0.230536	0.11433	-0.815874	0.0878281	0.694875	0.442252	1.0918					0.61357
495	Cathepsin G	Benign tumor: short bones of the lower limbs	Inverse variance weighted	13	0.047573	0.25809	0.853757	-0.458284	0.55343	1.04872	0.632368	1.73921	22.9823	0.831806	0.802902	0.84	0.988884
496	Cathepsin G	Benign tumor: short bones of the lower limbs	MR Egger	13	-0.06202	0.50031	0.903581	-1.04263	0.918588	0.939864	0.352527	2.50575		0.773408			1
497	Cathepsin G	Benign tumor: short bones of the lower limbs	Weighted median	13	-0.00986124	0.374184	0.978975	-0.743262	0.723539	0.990187	0.47556	2.06172					1
498	Cathepsin G	Benign tumor: short bones of the lower limbs	Simple mode	13	0.109917	0.497776	0.828948	-0.865724	1.08556	1.11619	0.420747	2.96109					1
499	Cathepsin G	Benign tumor: short bones of the lower limbs	Weighted mode	13	0.059742	0.416134	0.888227	-0.75588	0.875364	1.06156	0.469597	2.39975					0.966778
500	Cathepsin G	Benign tumor: short bones of the lower limbs	Maximum likelihood	13	0.0484583	0.260568	0.852467	-0.462256	0.559172	1.04965	0.629861	1.74922					0.966529
501	Cathepsin E	Benign tumor: short bones of the lower limbs	Inverse variance weighted	10	-0.33757	0.237886	0.155886	-0.803826	0.128686	0.713502	0.447613	1.13733	21.973	0.484394	0.848399	0.522	0.896347
502	Cathepsin E	Benign tumor: short bones of the lower limbs	MR Egger	10	-0.402197	0.408634	0.353821	-1.20312	0.398726	0.668849	0.300256	1.48992		0.389747			1
503	Cathepsin E	Benign tumor: short bones of the lower limbs	Weighted median	10	-0.37162	0.327389	0.256333	-1.0133	0.270063	0.689616	0.363018	1.31005					1
504	Cathepsin E	Benign tumor: short bones of the lower limbs	Simple mode	10	0.119039	0.516852	0.822997	-0.893991	1.13207	1.12641	0.40902	3.10207					1
505	Cathepsin E	Benign tumor: short bones of the lower limbs	Weighted mode	10	-0.395126	0.395443	0.343804	-1.17019	0.379942	0.673595	0.310307	1.4622					1
506	Cathepsin E	Benign tumor: short bones of the lower limbs	Maximum likelihood	10	-0.338985	0.240484	0.158658	-0.810333	0.132363	0.712493	0.44471	1.14152					0.751294
507	Cathepsin H	Benign tumor: short bones of the lower limbs	Inverse variance weighted	11	-0.255942	0.180862	0.157031	-0.610431	0.0985464	0.774186	0.543117	1.10357	126.485	0.113456	0.231046	0.295	0.871792
508	Cathepsin H	Benign tumor: short bones of the lower limbs	MR Egger	11	-0.0436166	0.240912	0.860342	-0.515805	0.428572	0.957321	0.59702	1.53506		0.156559			1
509	Cathepsin H	Benign tumor: short bones of the lower limbs	Weighted median	11	-0.102772	0.162958	0.528257	-0.42217	0.216625	0.902332	0.655623	1.24188					1
510	Cathepsin H	Benign tumor: short bones of the lower limbs	Simple mode	11	-0.770875	0.532574	0.178383	-1.81472	0.27297	0.462608	0.162884	1.31386					1
511	Cathepsin H	Benign tumor: short bones of the lower limbs	Weighted mode	11	-0.132303	0.162285	0.433916	-0.450381	0.185775	0.876076	0.637385	1.20415					1
512	Cathepsin H	Benign tumor: short bones of the lower limbs	Maximum likelihood	11	-0.259363	0.146139	0.0759366	-0.545796	0.0270701	0.771543	0.57938	1.02744					0.61129
513	Cathepsin O	Benign tumor: short bones of the lower limbs	Inverse variance weighted	12	-0.026928	0.305619	0.929789	-0.625941	0.572085	0.973431	0.534758	1.77196	23.2138	0.358274	0.618811	0.35	0.978406
514	Cathepsin O	Benign tumor: short bones of the lower limbs	MR Egger	12	-0.363659	0.728188	0.6283	-1.79091	1.06359	0.695128	0.166809	2.89675		0.30132			1
515	Cathepsin O	Benign tumor: short bones of the lower limbs	Weighted median	12	-0.420525	0.403037	0.296767	-1.21048	0.369427	0.656702	0.298055	1.44691					1
516	Cathepsin O	Benign tumor: short bones of the lower limbs	Simple mode	12	-0.686692	0.724135	0.363349	-2.106	0.732613	0.503238	0.121724	2.08051					1
517	Cathepsin O	Benign tumor: short bones of the lower limbs	Weighted mode	12	-0.741999	0.618238	0.255278	-1.95375	0.469748	0.476161	0.141742	1.59959					1
518	Cathepsin O	Benign tumor: short bones of the lower limbs	Maximum likelihood	12	-0.0291315	0.299497	0.922514	-0.616146	0.557883	0.971289	0.540022	1.74697					0.97075
519	Cathepsin S	Benign tumor: short bones of the lower limbs	Inverse variance weighted	24	0.203419	0.180583	0.25997	-0.150523	0.557361	1.22559	0.860258	1.74606	39.7152	0.767048	0.918352	0.806	0.930116
520	Cathepsin S	Benign tumor: short bones of the lower limbs	MR Egger	24	0.177245	0.310364	0.573729	-0.431069	0.785558	1.19392	0.649814	2.19363		0.717093			1
521	Cathepsin S	Benign tumor: short bones of the lower limbs	Weighted median	24	0.271292	0.262868	0.302049	-0.243928	0.786513	1.31166	0.783544	2.19573					1
522	Cathepsin S	Benign tumor: short bones of the lower limbs	Simple mode	24	0.437287	0.420365	0.309034	-0.386628	1.2612	1.5485	0.679344	3.52966					1
523	Cathepsin S	Benign tumor: short bones of the lower limbs	Weighted mode	24	0.311879	0.260209	0.242899	-0.198131	0.821888	1.36599	0.820263	2.27479					1
524	Cathepsin S	Benign tumor: short bones of the lower limbs	Maximum likelihood	24	0.206757	0.181959	0.255838	-0.149882	0.563396	1.22968	0.860809	1.75663					0.807644
525	Cathepsin L2	Benign tumor: short bones of the lower limbs	Inverse variance weighted	11	-0.561598	0.329325	0.0881381	-1.20707	0.0838783	0.570297	0.299071	1.0875	24.6843	0.663142	0.44774	0.665	0.746854
526	Cathepsin L2	Benign tumor: short bones of the lower limbs	MR Egger	11	-1.22552	0.89889	0.205895	-2.98734	0.536307	0.293606	0.0504214	1.70968		0.635219			1
527	Cathepsin L2	Benign tumor: short bones of the lower limbs	Weighted median	11	-0.501202	0.462121	0.278113	-1.40696	0.404556	0.605802	0.244887	1.49864					1
528	Cathepsin L2	Benign tumor: short bones of the lower limbs	Simple mode	11	-1.14496	0.788744	0.177244	-2.6909	0.400974	0.318235	0.0678196	1.49328					1
529	Cathepsin L2	Benign tumor: short bones of the lower limbs	Weighted mode	11	-0.805711	0.697188	0.274687	-2.1722	0.560779	0.44677	0.113927	1.75204					0.976663
530	Cathepsin L2	Benign tumor: short bones of the lower limbs	Maximum likelihood	11	-0.562473	0.335971	0.0940967	-1.22098	0.0960298	0.569798	0.294942	1.10079					0.561095
531	Cathepsin Z	Benign tumor: short bones of the lower limbs	Inverse variance weighted	13	-0.379601	0.206636	0.0662029	-0.784608	0.0254065	0.684135	0.456299	1.02573	53.4584	0.7687	0.411823	0.802	1
532	Cathepsin Z	Benign tumor: short bones of the lower limbs	MR Egger	13	-0.598851	0.329785	0.096715	-1.24523	0.0475271	0.549443	0.287875	1.04867		0.758991			1
533	Cathepsin Z	Benign tumor: short bones of the lower limbs	Weighted median	13	-0.492629	0.265527	0.0635549	-1.01306	0.0278035	0.611018	0.363106	1.02819					0.726342
534	Cathepsin Z	Benign tumor: short bones of the lower limbs	Simple mode	13	-0.591087	0.414562	0.179414	-1.40363	0.221453	0.553725	0.245704	1.24789					1
535	Cathepsin Z	Benign tumor: short bones of the lower limbs	Weighted mode	13	-0.493939	0.274586	0.0972236	-1.03213	0.0442507	0.610218	0.356248	1.04524					1
536	Cathepsin Z	Benign tumor: short bones of the lower limbs	Maximum likelihood	13	-0.386828	0.209145	0.0643753	-0.796751	0.0230954	0.679208	0.450791	1.02336					0.690961
537	Cathepsin B	Benign tumor: short bones in the upper limb	Inverse variance weighted	17	-0.0801998	0.179838	0.655629	-0.432683	0.272283	0.922932	0.648766	1.31296	35.5021	0.8576	0.779055	0.868	0.986508
538	Cathepsin B	Benign tumor: short bones in the upper limb	MR Egger	17	0.0277219	0.418432	0.948052	-0.792405	0.847849	1.02811	0.452755	2.33462		0.814141			0.966168
539	Cathepsin B	Benign tumor: short bones in the upper limb	Weighted median	17	0.0509825	0.249829	0.838299	-0.438683	0.540648	1.0523	0.644885	1.71712					1
540	Cathepsin B	Benign tumor: short bones in the upper limb	Simple mode	17	-0.197999	0.401718	0.628793	-0.985367	0.589369	0.820371	0.373302	1.80285					1
541	Cathepsin B	Benign tumor: short bones in the upper limb	Weighted mode	17	-0.0386021	0.304487	0.900696	-0.635396	0.558192	0.962133	0.529726	1.74751					0.96719
542	Cathepsin B	Benign tumor: short bones in the upper limb	Maximum likelihood	17	-0.0807651	0.181904	0.657043	-0.437296	0.275766	0.92241	0.64578	1.31754					0.970495
543	Cathepsin F	Benign tumor: short bones in the upper limb	Inverse variance weighted	12	0.214861	0.221592	0.332234	-0.21946	0.649182	1.23969	0.802952	1.91397	36.6058	0.150909	0.539473	0.164	1
544	Cathepsin F	Benign tumor: short bones in the upper limb	MR Egger	12	0.521989	0.534416	0.351732	-0.525467	1.56944	1.68538	0.591279	4.80398		0.127287			1
545	Cathepsin F	Benign tumor: short bones in the upper limb	Weighted median	12	0.17784	0.259712	0.493497	-0.331196	0.686876	1.19463	0.718065	1.9875					1
546	Cathepsin F	Benign tumor: short bones in the upper limb	Simple mode	12	0.14001	0.390166	0.726501	-0.624716	0.904737	1.15029	0.535414	2.47128					1
547	Cathepsin F	Benign tumor: short bones in the upper limb	Weighted mode	12	0.230033	0.318794	0.485613	-0.394804	0.85487	1.25864	0.673812	2.35107					1
548	Cathepsin F	Benign tumor: short bones in the upper limb	Maximum likelihood	12	0.225286	0.188456	0.231917	-0.144087	0.594659	1.25268	0.865813	1.81241					0.77789
549	Cathepsin G	Benign tumor: short bones in the upper limb	Inverse variance weighted	13	-0.00354513	0.212829	0.98671	-0.42069	0.4136	0.996461	0.656593	1.51225	22.9823	0.411743	0.5787	0.385	0.98671
550	Cathepsin G	Benign tumor: short bones in the upper limb	MR Egger	13	0.204541	0.424546	0.6394	-0.627569	1.03665	1.22696	0.533888	2.81976		0.358304			1
551	Cathepsin G	Benign tumor: short bones in the upper limb	Weighted median	13	0.225305	0.29365	0.442927	-0.350248	0.800859	1.25271	0.704513	2.22745					1
552	Cathepsin G	Benign tumor: short bones in the upper limb	Simple mode	13	-0.214852	0.511652	0.681965	-1.21769	0.787986	0.80666	0.295913	2.19896					1
553	Cathepsin G	Benign tumor: short bones in the upper limb	Weighted mode	13	0.264339	0.329906	0.43856	-0.382276	0.910955	1.30257	0.682307	2.4867					1
554	Cathepsin G	Benign tumor: short bones in the upper limb	Maximum likelihood	13	-0.00353055	0.214008	0.986838	-0.422986	0.415925	0.996476	0.655088	1.51577					0.986838
555	Cathepsin E	Benign tumor: short bones in the upper limb	Inverse variance weighted	10	0.178341	0.194509	0.359208	-0.202897	0.559579	1.19523	0.816362	1.74994	21.973	0.534716	0.251213	0.519	1
556	Cathepsin E	Benign tumor: short bones in the upper limb	MR Egger	10	-0.145125	0.325925	0.667926	-0.783937	0.493687	0.864914	0.456605	1.63835		0.595347			0.998768
557	Cathepsin E	Benign tumor: short bones in the upper limb	Weighted median	10	0.134152	0.278037	0.629452	-0.4108	0.679104	1.14357	0.66312	1.97211					1
558	Cathepsin E	Benign tumor: short bones in the upper limb	Simple mode	10	0.399403	0.426487	0.373465	-0.43651	1.23532	1.49093	0.646288	3.43947					1
559	Cathepsin E	Benign tumor: short bones in the upper limb	Weighted mode	10	-0.113669	0.34909	0.752158	-0.797885	0.570547	0.892553	0.45028	1.76923					1
560	Cathepsin E	Benign tumor: short bones in the upper limb	Maximum likelihood	10	0.188952	0.201926	0.349404	-0.206824	0.584727	1.20798	0.813163	1.7945					0.937567
561	Cathepsin H	Benign tumor: short bones in the upper limb	Inverse variance weighted	11	-0.0300882	0.117068	0.797167	-0.259541	0.199365	0.97036	0.771406	1.22063	126.485	0.778529	0.986797	0.786	0.987261
562	Cathepsin H	Benign tumor: short bones in the upper limb	MR Egger	11	-0.0319657	0.160877	0.846917	-0.347286	0.283354	0.96854	0.706604	1.32758		0.696941			1
563	Cathepsin H	Benign tumor: short bones in the upper limb	Weighted median	11	-0.0362492	0.132957	0.785131	-0.296845	0.224347	0.9644	0.743159	1.2515					1
564	Cathepsin H	Benign tumor: short bones in the upper limb	Simple mode	11	0.480593	0.341633	0.18981	-0.189007	1.15019	1.61703	0.827781	3.1588					1
565	Cathepsin H	Benign tumor: short bones in the upper limb	Weighted mode	11	-0.0506103	0.129333	0.703772	-0.304104	0.202883	0.950649	0.737784	1.22493					1
566	Cathepsin H	Benign tumor: short bones in the upper limb	Maximum likelihood	11	-0.0302161	0.117367	0.796831	-0.260255	0.199822	0.970236	0.770855	1.22119					0.971892
567	Cathepsin O	Benign tumor: short bones in the upper limb	Inverse variance weighted	12	-0.280542	0.236574	0.235681	-0.744227	0.183143	0.755374	0.475101	1.20099	23.2138	0.51966	0.93571	0.599	0.882432
568	Cathepsin O	Benign tumor: short bones in the upper limb	MR Egger	12	-0.321281	0.546968	0.569969	-1.39334	0.750777	0.725219	0.248245	2.11865		0.430662			1
569	Cathepsin O	Benign tumor: short bones in the upper limb	Weighted median	12	-0.196038	0.325348	0.546808	-0.833719	0.441643	0.821981	0.43443	1.55526					1
570	Cathepsin O	Benign tumor: short bones in the upper limb	Simple mode	12	-0.0814894	0.502053	0.874003	-1.06551	0.902534	0.921742	0.344551	2.46584					1
571	Cathepsin O	Benign tumor: short bones in the upper limb	Weighted mode	12	-0.120595	0.463358	0.799468	-1.02878	0.787586	0.886393	0.357444	2.19808					0.976449
572	Cathepsin O	Benign tumor: short bones in the upper limb	Maximum likelihood	12	-0.276158	0.240318	0.2505	-0.747182	0.194866	0.758693	0.473699	1.21515					0.80661
573	Cathepsin S	Benign tumor: short bones in the upper limb	Inverse variance weighted	24	0.196236	0.146867	0.181501	-0.091623	0.484094	1.21681	0.912449	1.6227	39.7152	0.927291	0.93958	0.928	0.834904
574	Cathepsin S	Benign tumor: short bones in the upper limb	MR Egger	24	0.212043	0.253139	0.411232	-0.284109	0.708195	1.2362	0.752685	2.03032		0.902207			1
575	Cathepsin S	Benign tumor: short bones in the upper limb	Weighted median	24	0.10712	0.218464	0.623899	-0.321069	0.535309	1.11307	0.725373	1.70798					1
576	Cathepsin S	Benign tumor: short bones in the upper limb	Simple mode	24	0.111045	0.375977	0.770375	-0.625869	0.84796	1.11745	0.534796	2.33488					1
577	Cathepsin S	Benign tumor: short bones in the upper limb	Weighted mode	24	0.074657	0.19987	0.712177	-0.317089	0.466403	1.07751	0.728266	1.59425					1
578	Cathepsin S	Benign tumor: short bones in the upper limb	Maximum likelihood	24	0.197928	0.148368	0.182193	-0.0928736	0.488729	1.21887	0.911309	1.63024					0.715442
579	Cathepsin L2	Benign tumor: short bones in the upper limb	Inverse variance weighted	11	-0.0355655	0.266963	0.894017	-0.558812	0.487681	0.965059	0.571888	1.62854	24.6843	0.677528	0.423714	0.709	0.966018
580	Cathepsin L2	Benign tumor: short bones in the upper limb	MR Egger	11	0.529823	0.725568	0.483829	-0.89229	1.95194	1.69863	0.409717	7.04231		0.658149			1
581	Cathepsin L2	Benign tumor: short bones in the upper limb	Weighted median	11	-0.140611	0.352637	0.690083	-0.831779	0.550557	0.868827	0.435274	1.73422					1
582	Cathepsin L2	Benign tumor: short bones in the upper limb	Simple mode	11	-0.0734696	0.499458	0.885978	-1.05241	0.905468	0.929164	0.349096	2.47309					1
583	Cathepsin L2	Benign tumor: short bones in the upper limb	Weighted mode	11	-0.013395	0.436423	0.976119	-0.868784	0.841994	0.986694	0.419461	2.32099					0.976119
584	Cathepsin L2	Benign tumor: short bones in the upper limb	Maximum likelihood	11	-0.0364315	0.269745	0.892565	-0.565132	0.492269	0.964224	0.568285	1.63602					0.96445
585	Cathepsin Z	Benign tumor: short bones in the upper limb	Inverse variance weighted	13	-0.00911529	0.167006	0.956473	-0.336447	0.318216	0.990926	0.714304	1.37467	53.4584	0.762651	0.478537	0.698	0.974633
586	Cathepsin Z	Benign tumor: short bones in the upper limb	MR Egger	13	-0.161547	0.266581	0.556817	-0.684046	0.360953	0.850827	0.504571	1.4347		0.735972			1
587	Cathepsin Z	Benign tumor: short bones in the upper limb	Weighted median	13	-0.0322208	0.224384	0.885819	-0.472014	0.407573	0.968293	0.623745	1.50316					0.998106
588	Cathepsin Z	Benign tumor: short bones in the upper limb	Simple mode	13	0.126398	0.384963	0.748314	-0.628129	0.880925	1.13473	0.533589	2.41313					1
589	Cathepsin Z	Benign tumor: short bones in the upper limb	Weighted mode	13	-0.0890991	0.249148	0.726842	-0.577429	0.399231	0.914755	0.56134	1.49068					1
590	Cathepsin Z	Benign tumor: short bones in the upper limb	Maximum likelihood	13	-0.0092246	0.168245	0.956275	-0.338985	0.320536	0.990818	0.712493	1.37787					0.974432
591	Cathepsin B	Malignant tumors of bone and articular cartilage	Inverse variance weighted	17	0.0848365	0.253566	0.737947	-0.412154	0.581827	1.08854	0.662222	1.7893	35.5021	0.229838	0.154778	0.27	0.981897
592	Cathepsin B	Malignant tumors of bone and articular cartilage	MR Egger	17	0.854456	0.568742	0.153762	-0.260278	1.96919	2.3501	0.770837	7.16487		0.306274			1
593	Cathepsin B	Malignant tumors of bone and articular cartilage	Weighted median	17	0.209059	0.330995	0.527643	-0.439691	0.857809	1.23252	0.644236	2.35799					1
594	Cathepsin B	Malignant tumors of bone and articular cartilage	Simple mode	17	-0.280943	0.543443	0.612251	-1.34609	0.784205	0.755072	0.260256	2.19067					1
595	Cathepsin B	Malignant tumors of bone and articular cartilage	Weighted mode	17	0.222307	0.382187	0.568894	-0.52678	0.971394	1.24895	0.590503	2.64162					1
596	Cathepsin B	Malignant tumors of bone and articular cartilage	Maximum likelihood	17	0.0886491	0.232304	0.702752	-0.366667	0.543965	1.0927	0.69304	1.72282					0.95884
597	Cathepsin F	Malignant tumors of bone and articular cartilage	Inverse variance weighted	12	-0.300821	0.236126	0.202668	-0.763628	0.161985	0.74021	0.465973	1.17584	36.6058	0.568932	0.785651	0.641	0.88188
598	Cathepsin F	Malignant tumors of bone and articular cartilage	MR Egger	12	-0.16133	0.552319	0.776184	-1.24388	0.921216	0.851011	0.288265	2.51234		0.485637			1
599	Cathepsin F	Malignant tumors of bone and articular cartilage	Weighted median	12	-0.364962	0.308212	0.236364	-0.969058	0.239134	0.694223	0.37944	1.27015					0.995216
600	Cathepsin F	Malignant tumors of bone and articular cartilage	Simple mode	12	-0.298593	0.446052	0.517036	-1.17285	0.575668	0.741861	0.309482	1.77832					1
601	Cathepsin F	Malignant tumors of bone and articular cartilage	Weighted mode	12	-0.368536	0.364523	0.333735	-1.083	0.34593	0.691746	0.338578	1.4133					1
602	Cathepsin F	Malignant tumors of bone and articular cartilage	Maximum likelihood	12	-0.306075	0.239479	0.201218	-0.775453	0.163303	0.736331	0.460495	1.17739					0.736274
603	Cathepsin G	Malignant tumors of bone and articular cartilage	Inverse variance weighted	13	0.167758	0.266418	0.528903	-0.354421	0.689938	1.18265	0.701579	1.99359	22.9823	0.531048	0.667372	0.588	1
604	Cathepsin G	Malignant tumors of bone and articular cartilage	MR Egger	13	-0.0280555	0.517346	0.957725	-1.04205	0.985943	0.972334	0.352729	2.68034		0.461856			0.963748
605	Cathepsin G	Malignant tumors of bone and articular cartilage	Weighted median	13	-0.0837209	0.387393	0.828899	-0.84301	0.675569	0.919688	0.430413	1.96515					1
606	Cathepsin G	Malignant tumors of bone and articular cartilage	Simple mode	13	-0.275555	0.591004	0.649388	-1.43392	0.882814	0.759151	0.238372	2.41769					1
607	Cathepsin G	Malignant tumors of bone and articular cartilage	Weighted mode	13	-0.136391	0.38069	0.726363	-0.882542	0.609761	0.872502	0.41373	1.83999					1
608	Cathepsin G	Malignant tumors of bone and articular cartilage	Maximum likelihood	13	0.175258	0.272148	0.519587	-0.358152	0.708669	1.19155	0.698967	2.03128					1
609	Cathepsin E	Malignant tumors of bone and articular cartilage	Inverse variance weighted	10	-0.171169	0.249693	0.493018	-0.660568	0.31823	0.842679	0.516558	1.37469	21.973	0.841454	0.78177	0.869	1
610	Cathepsin E	Malignant tumors of bone and articular cartilage	MR Egger	10	-0.267473	0.418726	0.54082	-1.08818	0.55323	0.765311	0.33683	1.73886		0.775031			1
611	Cathepsin E	Malignant tumors of bone and articular cartilage	Weighted median	10	-0.182604	0.332785	0.583202	-0.834863	0.469655	0.833098	0.433934	1.59944					0.992684
612	Cathepsin E	Malignant tumors of bone and articular cartilage	Simple mode	10	-0.344698	0.475978	0.487347	-1.27761	0.588218	0.708434	0.278702	1.80078					1
613	Cathepsin E	Malignant tumors of bone and articular cartilage	Weighted mode	10	-0.215314	0.380311	0.585128	-0.960723	0.530095	0.806288	0.382616	1.69909					1
614	Cathepsin E	Malignant tumors of bone and articular cartilage	Maximum likelihood	10	-0.173317	0.252095	0.491763	-0.667422	0.320789	0.840871	0.513029	1.37821					0.989674
615	Cathepsin H	Malignant tumors of bone and articular cartilage	Inverse variance weighted	11	0.304256	0.181395	0.093481	-0.0512777	0.65979	1.35562	0.950015	1.93439	126.485	0.134259	0.477297	0.359	0.716688
616	Cathepsin H	Malignant tumors of bone and articular cartilage	MR Egger	11	0.174495	0.255109	0.5112	-0.325518	0.674508	1.19064	0.722153	1.96307		0.119507			1
617	Cathepsin H	Malignant tumors of bone and articular cartilage	Weighted median	11	0.24874	0.157994	0.115403	-0.0609281	0.558409	1.28241	0.940891	1.74789					0.839295
618	Cathepsin H	Malignant tumors of bone and articular cartilage	Simple mode	11	0.708205	0.464002	0.157922	-0.201239	1.61765	2.03034	0.817717	5.04122					1
619	Cathepsin H	Malignant tumors of bone and articular cartilage	Weighted mode	11	0.221755	0.159418	0.194389	-0.0907041	0.534214	1.24827	0.913288	1.70611					1
620	Cathepsin H	Malignant tumors of bone and articular cartilage	Maximum likelihood	11	0.30702	0.149312	0.0397606	0.014368	0.599672	1.35937	1.01447	1.82152					0.711273
621	Cathepsin O	Malignant tumors of bone and articular cartilage	Inverse variance weighted	12	-0.0368481	0.320226	0.90839	-0.664492	0.590795	0.963823	0.514535	1.80542	23.2138	0.344064	0.611901	0.389	0.975006
622	Cathepsin O	Malignant tumors of bone and articular cartilage	MR Egger	12	0.324519	0.765468	0.680578	-1.1758	1.82484	1.38337	0.308573	6.20178		0.28926			0.999013
623	Cathepsin O	Malignant tumors of bone and articular cartilage	Weighted median	12	-0.165639	0.412096	0.687726	-0.973347	0.642069	0.847352	0.377817	1.90041					1
624	Cathepsin O	Malignant tumors of bone and articular cartilage	Simple mode	12	-0.151058	0.599117	0.805587	-1.32533	1.02321	0.859798	0.265716	2.78212					1
625	Cathepsin O	Malignant tumors of bone and articular cartilage	Weighted mode	12	-0.180439	0.547718	0.748013	-1.25397	0.893089	0.834904	0.285371	2.44266					1
626	Cathepsin O	Malignant tumors of bone and articular cartilage	Maximum likelihood	12	-0.0384789	0.308156	0.900628	-0.642464	0.565506	0.962252	0.525995	1.76034					0.966674
627	Cathepsin S	Malignant tumors of bone and articular cartilage	Inverse variance weighted	24	0.415696	0.187953	0.0269871	0.0473086	0.784083	1.51542	1.04845	2.1904	39.7152	0.736127	0.288754	0.757	1
628	Cathepsin S	Malignant tumors of bone and articular cartilage	MR Egger	24	0.127277	0.325136	0.699224	-0.50999	0.764545	1.13573	0.600502	2.14802		0.751891			1
629	Cathepsin S	Malignant tumors of bone and articular cartilage	Weighted median	24	0.262668	0.273208	0.33634	-0.272819	0.798156	1.30039	0.76123	2.22144					1
630	Cathepsin S	Malignant tumors of bone and articular cartilage	Simple mode	24	0.159815	0.496921	0.750652	-0.81415	1.13378	1.17329	0.443016	3.10738					1
631	Cathepsin S	Malignant tumors of bone and articular cartilage	Weighted mode	24	0.246015	0.282929	0.393543	-0.308526	0.800556	1.27892	0.734529	2.22678					1
632	Cathepsin S	Malignant tumors of bone and articular cartilage	Maximum likelihood	24	0.428159	0.190388	0.0245205	0.0549984	0.80132	1.53443	1.05654	2.22848					0.657966
633	Cathepsin L2	Malignant tumors of bone and articular cartilage	Inverse variance weighted	11	0.253399	0.341455	0.458018	-0.415853	0.922652	1.2884	0.659777	2.51595	24.6843	0.590991	0.656516	0.595	0.996498
634	Cathepsin L2	Malignant tumors of bone and articular cartilage	MR Egger	11	-0.143838	0.92884	0.880351	-1.96436	1.67669	0.866028	0.140245	5.34781		0.516457			1
635	Cathepsin L2	Malignant tumors of bone and articular cartilage	Weighted median	11	0.375367	0.458369	0.412833	-0.523037	1.27377	1.45552	0.592718	3.5743					1
636	Cathepsin L2	Malignant tumors of bone and articular cartilage	Simple mode	11	0.364059	0.670309	0.598943	-0.949747	1.67786	1.43916	0.386839	5.35411					1
637	Cathepsin L2	Malignant tumors of bone and articular cartilage	Weighted mode	11	0.317564	0.65116	0.636284	-0.958708	1.59384	1.37378	0.383388	4.9226					1
638	Cathepsin L2	Malignant tumors of bone and articular cartilage	Maximum likelihood	11	0.26488	0.346315	0.44436	-0.413898	0.943657	1.30327	0.661069	2.56936					0.941341
639	Cathepsin Z	Malignant tumors of bone and articular cartilage	Inverse variance weighted	13	-0.0111603	0.243335	0.963419	-0.488097	0.465776	0.988902	0.613794	1.59325	53.4584	0.205675	0.557221	0.246	0.975537
640	Cathepsin Z	Malignant tumors of bone and articular cartilage	MR Egger	13	0.175619	0.397127	0.666896	-0.60275	0.953989	1.19198	0.547304	2.59605		0.174067			1
641	Cathepsin Z	Malignant tumors of bone and articular cartilage	Weighted median	13	-0.0546735	0.296167	0.85354	-0.63516	0.525813	0.946794	0.529851	1.69183					0.996835
642	Cathepsin Z	Malignant tumors of bone and articular cartilage	Simple mode	13	-0.72836	0.53717	0.200092	-1.78121	0.324493	0.4827	0.168434	1.38333					1
643	Cathepsin Z	Malignant tumors of bone and articular cartilage	Weighted mode	13	-0.0445151	0.319418	0.891475	-0.670575	0.581545	0.956461	0.511414	1.7888					0.963757
644	Cathepsin Z	Malignant tumors of bone and articular cartilage	Maximum likelihood	13	-0.011043	0.215461	0.959124	-0.433347	0.411261	0.989018	0.648335	1.50872					0.971188
645	Cathepsin B	Osteomyelitis	Inverse variance weighted	17	-0.120071	0.086405	0.164643	-0.289424	0.0492832	0.886858	0.748694	1.05052	35.5021	0.455918	0.0919725	0.518	0.828359
646	Cathepsin B	Osteomyelitis	MR Egger	17	-0.447239	0.201236	0.0420512	-0.841663	-0.0528162	0.639391	0.430993	0.948554		0.624144			1
647	Cathepsin B	Osteomyelitis	Weighted median	17	-0.201925	0.124338	0.104374	-0.445627	0.0417763	0.817156	0.640423	1.04266					0.927767
648	Cathepsin B	Osteomyelitis	Simple mode	17	-0.173817	0.210155	0.420352	-0.585721	0.238087	0.840451	0.556704	1.26882					1
649	Cathepsin B	Osteomyelitis	Weighted mode	17	-0.204794	0.146685	0.181741	-0.492297	0.0827088	0.814815	0.611221	1.08623					1
650	Cathepsin B	Osteomyelitis	Maximum likelihood	17	-0.119203	0.087786	0.1745	-0.291264	0.0528573	0.887627	0.747319	1.05428					0.702364
651	Cathepsin F	Osteomyelitis	Inverse variance weighted	12	-0.0173964	0.0945395	0.854004	-0.202694	0.167901	0.982754	0.816528	1.18282	36.6058	0.334821	0.484119	0.359	0.982105
652	Cathepsin F	Osteomyelitis	MR Egger	12	-0.165713	0.225837	0.479939	-0.608354	0.276928	0.84729	0.544246	1.31907		0.300625			1
653	Cathepsin F	Osteomyelitis	Weighted median	12	0.0904831	0.118593	0.445482	-0.14196	0.322926	1.0947	0.867656	1.38116					1
654	Cathepsin F	Osteomyelitis	Simple mode	12	0.108309	0.174697	0.547897	-0.234097	0.450716	1.11439	0.791285	1.56944					1
655	Cathepsin F	Osteomyelitis	Weighted mode	12	0.104706	0.148274	0.494767	-0.18591	0.395323	1.11038	0.830349	1.48486					1
656	Cathepsin F	Osteomyelitis	Maximum likelihood	12	-0.0179474	0.0908643	0.843422	-0.196041	0.160147	0.982213	0.821978	1.17368					0.969935
657	Cathepsin G	Osteomyelitis	Inverse variance weighted	13	0.0716263	0.100572	0.476349	-0.125496	0.268748	1.07425	0.88206	1.30833	22.9823	0.864721	0.801349	0.897	1
658	Cathepsin G	Osteomyelitis	MR Egger	13	0.0285525	0.195037	0.886258	-0.35372	0.410825	1.02896	0.702071	1.50806		0.813095			1
659	Cathepsin G	Osteomyelitis	Weighted median	13	0.0946772	0.13925	0.496563	-0.178253	0.367607	1.0993	0.836731	1.44427					1
660	Cathepsin G	Osteomyelitis	Simple mode	13	0.129468	0.183052	0.492906	-0.229315	0.48825	1.13822	0.795078	1.62946					1
661	Cathepsin G	Osteomyelitis	Weighted mode	13	0.083715	0.153034	0.594382	-0.216232	0.383662	1.08732	0.805549	1.46765					1
662	Cathepsin G	Osteomyelitis	Maximum likelihood	13	0.0731596	0.101451	0.470829	-0.125685	0.272004	1.0759	0.881893	1.31259					0.971839
663	Cathepsin E	Osteomyelitis	Inverse variance weighted	10	-0.0952429	0.0939088	0.310484	-0.279304	0.0888182	0.909152	0.75631	1.09288	21.973	0.851517	0.1609	0.874	0.999758
664	Cathepsin E	Osteomyelitis	MR Egger	10	0.0997543	0.157308	0.543697	-0.20857	0.408079	1.1049	0.811744	1.50393		0.965751			1
665	Cathepsin E	Osteomyelitis	Weighted median	10	-0.00719969	0.117781	0.951257	-0.23805	0.223651	0.992826	0.788163	1.25063					1
666	Cathepsin E	Osteomyelitis	Simple mode	10	-0.0456979	0.171124	0.795453	-0.381101	0.289706	0.955331	0.683109	1.33603					1
667	Cathepsin E	Osteomyelitis	Weighted mode	10	0.00573723	0.136904	0.967488	-0.262594	0.274068	1.00575	0.769054	1.3153					0.973573
668	Cathepsin E	Osteomyelitis	Maximum likelihood	10	-0.0981722	0.096512	0.309057	-0.287336	0.0909912	0.906493	0.75026	1.09526					0.888539
669	Cathepsin H	Osteomyelitis	Inverse variance weighted	11	-0.063418	0.056102	0.258305	-0.173378	0.0465419	0.938551	0.84082	1.04764	126.485	0.863417	0.21793	0.68	0.945163
670	Cathepsin H	Osteomyelitis	MR Egger	11	0.0066117	0.0770859	0.933527	-0.144477	0.1577	1.00663	0.865475	1.17082		0.933561			0.969898
671	Cathepsin H	Osteomyelitis	Weighted median	11	-0.0387476	0.0594548	0.514585	-0.155279	0.0777838	0.961994	0.856176	1.08089					1
672	Cathepsin H	Osteomyelitis	Simple mode	11	-0.264603	0.177299	0.166451	-0.612108	0.0829027	0.767511	0.542207	1.08644					1
673	Cathepsin H	Osteomyelitis	Weighted mode	11	-0.0355151	0.0619212	0.57894	-0.156881	0.0858504	0.965108	0.854806	1.08964					1
674	Cathepsin H	Osteomyelitis	Maximum likelihood	11	-0.0638134	0.0562251	0.256391	-0.174015	0.0463879	0.93818	0.840285	1.04748					0.793827
675	Cathepsin O	Osteomyelitis	Inverse variance weighted	12	-0.0907374	0.114419	0.427761	-0.314998	0.133523	0.913257	0.72979	1.14285	23.2138	0.870644	0.463007	0.861	1
676	Cathepsin O	Osteomyelitis	MR Egger	12	0.0911443	0.264378	0.737423	-0.427036	0.609324	1.09543	0.65244	1.83919		0.858547			1
677	Cathepsin O	Osteomyelitis	Weighted median	12	-0.0171879	0.162402	0.915713	-0.335495	0.301119	0.982959	0.714984	1.35137					1
678	Cathepsin O	Osteomyelitis	Simple mode	12	0.0210656	0.230085	0.928697	-0.4299	0.472031	1.02129	0.650574	1.60325					1
679	Cathepsin O	Osteomyelitis	Weighted mode	12	-0.0152734	0.220908	0.94612	-0.448254	0.417707	0.984843	0.638743	1.51848					0.964199
680	Cathepsin O	Osteomyelitis	Maximum likelihood	12	-0.0907943	0.115756	0.43283	-0.317676	0.136088	0.913206	0.727838	1.14578					0.967856
681	Cathepsin S	Osteomyelitis	Inverse variance weighted	24	0.0579932	0.0709122	0.413462	-0.0809947	0.196981	1.05971	0.922199	1.21772	39.7152	0.977232	0.275373	0.962	1
682	Cathepsin S	Osteomyelitis	MR Egger	24	-0.0540254	0.122706	0.664028	-0.294529	0.186478	0.947408	0.744882	1.205		0.983703			1
683	Cathepsin S	Osteomyelitis	Weighted median	24	-0.0383153	0.101471	0.705729	-0.237199	0.160568	0.962409	0.788835	1.17418					1
684	Cathepsin S	Osteomyelitis	Simple mode	24	0.0087447	0.179156	0.961492	-0.342402	0.359891	1.00878	0.710063	1.43317					1
685	Cathepsin S	Osteomyelitis	Weighted mode	24	-0.0291412	0.103372	0.780537	-0.231751	0.173469	0.971279	0.793143	1.18942					1
686	Cathepsin S	Osteomyelitis	Maximum likelihood	24	0.0586111	0.0714109	0.411784	-0.0813543	0.198577	1.06036	0.921867	1.21967					0.960829
687	Cathepsin L2	Osteomyelitis	Inverse variance weighted	11	-0.170676	0.196277	0.384538	-0.555378	0.214027	0.843095	0.573855	1.23866	24.6843	0.00978467	0.121946	0.015	1
688	Cathepsin L2	Osteomyelitis	MR Egger	11	-0.946874	0.488901	0.0847516	-1.90512	0.0113725	0.387952	0.148805	1.01144		0.040385			1
689	Cathepsin L2	Osteomyelitis	Weighted median	11	-0.125088	0.21972	0.569148	-0.55574	0.305564	0.882419	0.573648	1.35739					0.989823
690	Cathepsin L2	Osteomyelitis	Simple mode	11	-0.582526	0.485934	0.258251	-1.53496	0.369904	0.558486	0.215465	1.4476					1
691	Cathepsin L2	Osteomyelitis	Weighted mode	11	0.337545	0.418364	0.438537	-0.482448	1.15754	1.4015	0.61727	3.18209					1
692	Cathepsin L2	Osteomyelitis	Maximum likelihood	11	-0.188625	0.135853	0.165002	-0.454898	0.077648	0.828097	0.634513	1.08074					0.75901
693	Cathepsin Z	Osteomyelitis	Inverse variance weighted	13	0.0327685	0.121473	0.787345	-0.205319	0.270856	1.03331	0.814388	1.31109	53.4584	0.006225	0.00334763	0.538	0.990333
694	Cathepsin Z	Osteomyelitis	MR Egger	13	-0.353049	0.133564	0.0228585	-0.614835	-0.0912632	0.702543	0.54073	0.912777		0.347102			0.731473
695	Cathepsin Z	Osteomyelitis	Weighted median	13	0.0694401	0.121042	0.56618	-0.167802	0.306682	1.07191	0.845521	1.35891					1
696	Cathepsin Z	Osteomyelitis	Simple mode	13	0.0803806	0.202129	0.697857	-0.315793	0.476554	1.0837	0.729211	1.61051					1
697	Cathepsin Z	Osteomyelitis	Weighted mode	13	0.0803806	0.149267	0.600077	-0.212183	0.372944	1.0837	0.808817	1.452					1
698	Cathepsin Z	Osteomyelitis	Maximum likelihood	13	0.0338998	0.0815905	0.677785	-0.126018	0.193817	1.03448	0.881599	1.21387					0.974316
699	Cathepsin B	Palindromic rheumatism	Inverse variance weighted	17	-0.0723238	0.239991	0.76314	-0.542707	0.398059	0.93023	0.581173	1.48893	35.5021	0.246095	0.307071	0.258	0.982924
700	Cathepsin B	Palindromic rheumatism	MR Egger	17	0.460458	0.557726	0.421969	-0.632685	1.5536	1.5848	0.531163	4.72847		0.257477			1
701	Cathepsin B	Palindromic rheumatism	Weighted median	17	0.192185	0.32043	0.548657	-0.435857	0.820227	1.21189	0.64671	2.27102					1
702	Cathepsin B	Palindromic rheumatism	Simple mode	17	-0.517043	0.639122	0.430387	-1.76972	0.735635	0.596281	0.17038	2.08681					1
703	Cathepsin B	Palindromic rheumatism	Weighted mode	17	0.0861374	0.384463	0.825557	-0.667409	0.839684	1.08996	0.513036	2.31564					0.971244
704	Cathepsin B	Palindromic rheumatism	Maximum likelihood	17	-0.0753071	0.22218	0.73465	-0.510779	0.360165	0.927459	0.600028	1.43357					0.938719
705	Cathepsin F	Palindromic rheumatism	Inverse variance weighted	12	0.32928	0.223087	0.13994	-0.107971	0.766532	1.38997	0.897653	2.15229	36.6058	0.712361	0.575637	0.686	0.834459
706	Cathepsin F	Palindromic rheumatism	MR Egger	12	0.0566017	0.521384	0.915699	-0.965311	1.07851	1.05823	0.380865	2.94031		0.66048			0.996679
707	Cathepsin F	Palindromic rheumatism	Weighted median	12	0.467662	0.309817	0.131177	-0.13958	1.0749	1.59626	0.869724	2.92971					0.807243
708	Cathepsin F	Palindromic rheumatism	Simple mode	12	0.741201	0.526605	0.186902	-0.290945	1.77335	2.09845	0.747557	5.89053					1
709	Cathepsin F	Palindromic rheumatism	Weighted mode	12	0.750554	0.496661	0.15892	-0.222903	1.72401	2.11817	0.800193	5.60697					1
710	Cathepsin F	Palindromic rheumatism	Maximum likelihood	12	0.340307	0.226636	0.133212	-0.103901	0.784514	1.40538	0.901315	2.19134					0.649915
711	Cathepsin G	Palindromic rheumatism	Inverse variance weighted	13	0.0470015	0.253261	0.85277	-0.449389	0.543392	1.04812	0.638018	1.72184	22.9823	0.434152	0.997569	0.488	0.994898
712	Cathepsin G	Palindromic rheumatism	MR Egger	13	0.0483701	0.512645	0.926525	-0.956415	1.05315	1.04956	0.384268	2.86668		0.352887			0.994926
713	Cathepsin G	Palindromic rheumatism	Weighted median	13	0.0889366	0.371935	0.811014	-0.640056	0.817929	1.09301	0.527263	2.2658					1
714	Cathepsin G	Palindromic rheumatism	Simple mode	13	0.0394748	0.518375	0.940554	-0.976539	1.05549	1.04026	0.376612	2.87338					1
715	Cathepsin G	Palindromic rheumatism	Weighted mode	13	0.125567	0.343953	0.721412	-0.548581	0.799714	1.13379	0.577769	2.22491					1
716	Cathepsin G	Palindromic rheumatism	Maximum likelihood	13	0.0487314	0.254936	0.848407	-0.450943	0.548405	1.04994	0.637027	1.73049					0.968748
717	Cathepsin E	Palindromic rheumatism	Inverse variance weighted	10	0.0873896	0.243391	0.719558	-0.389657	0.564437	1.09132	0.677289	1.75846	21.973	0.379668	0.595598	0.456	0.981769
718	Cathepsin E	Palindromic rheumatism	MR Egger	10	-0.100598	0.424142	0.818478	-0.931917	0.730721	0.904297	0.393798	2.07658		0.318117			0.984636
719	Cathepsin E	Palindromic rheumatism	Weighted median	10	-0.0369964	0.31836	0.907487	-0.660983	0.58699	0.96368	0.516344	1.79857					1
720	Cathepsin E	Palindromic rheumatism	Simple mode	10	-0.134257	0.424431	0.758971	-0.966141	0.697627	0.874366	0.380549	2.00898					1
721	Cathepsin E	Palindromic rheumatism	Weighted mode	10	-0.0585347	0.339517	0.866933	-0.723988	0.606918	0.943146	0.484815	1.83477					0.963259
722	Cathepsin E	Palindromic rheumatism	Maximum likelihood	10	0.0911783	0.238227	0.701914	-0.375746	0.558103	1.09546	0.686777	1.74735					0.965882
723	Cathepsin H	Palindromic rheumatism	Inverse variance weighted	11	0.0397379	0.144667	0.783557	-0.243809	0.323285	1.04054	0.783637	1.38166	126.485	0.38453	0.481103	0.528	1
724	Cathepsin H	Palindromic rheumatism	MR Egger	11	0.142386	0.203583	0.501977	-0.256637	0.54141	1.15302	0.773649	1.71843		0.345853			1
725	Cathepsin H	Palindromic rheumatism	Weighted median	11	0.0120452	0.153243	0.937349	-0.28831	0.312401	1.01212	0.749529	1.3667					1
726	Cathepsin H	Palindromic rheumatism	Simple mode	11	0.00192274	0.485135	0.996916	-0.948941	0.952786	1.00192	0.387151	2.59292					1
727	Cathepsin H	Palindromic rheumatism	Weighted mode	11	0.0157837	0.155357	0.921085	-0.288715	0.320283	1.01591	0.749226	1.37752					0.975984
728	Cathepsin H	Palindromic rheumatism	Maximum likelihood	11	0.0400435	0.14068	0.775917	-0.235688	0.315775	1.04086	0.790027	1.37132					0.960944
729	Cathepsin O	Palindromic rheumatism	Inverse variance weighted	12	-0.543258	0.302325	0.0723459	-1.13581	0.0492984	0.580853	0.321161	1.05053	23.2138	0.347863	0.0511762	0.4	0.97064
730	Cathepsin O	Palindromic rheumatism	MR Egger	12	0.781593	0.663526	0.266093	-0.518918	2.0821	2.18495	0.595164	8.02133		0.695973			1
731	Cathepsin O	Palindromic rheumatism	Weighted median	12	-0.564458	0.402749	0.161061	-1.35385	0.22493	0.568668	0.258245	1.25224					0.888612
732	Cathepsin O	Palindromic rheumatism	Simple mode	12	-0.750788	0.621392	0.252291	-1.96872	0.467141	0.471995	0.139636	1.59543					1
733	Cathepsin O	Palindromic rheumatism	Weighted mode	12	-0.452285	0.553195	0.430946	-1.53655	0.631978	0.636173	0.215122	1.88133					1
734	Cathepsin O	Palindromic rheumatism	Maximum likelihood	12	-0.556562	0.295452	0.0595972	-1.13565	0.0225248	0.573177	0.321214	1.02278					0.685368
735	Cathepsin S	Palindromic rheumatism	Inverse variance weighted	24	0.0932089	0.190298	0.624272	-0.279776	0.466193	1.09769	0.755953	1.59392	39.7152	0.287401	0.257352	0.322	1
736	Cathepsin S	Palindromic rheumatism	MR Egger	24	-0.217047	0.326885	0.513599	-0.857742	0.423648	0.804892	0.424119	1.52752		0.308346			1
737	Cathepsin S	Palindromic rheumatism	Weighted median	24	-0.181897	0.267584	0.496646	-0.706362	0.342568	0.833687	0.493436	1.40856					1
738	Cathepsin S	Palindromic rheumatism	Simple mode	24	-0.264995	0.443827	0.556295	-1.13489	0.604906	0.76721	0.321456	1.83108					1
739	Cathepsin S	Palindromic rheumatism	Weighted mode	24	-0.232897	0.269592	0.39657	-0.761298	0.295503	0.792235	0.46706	1.3438					1
740	Cathepsin S	Palindromic rheumatism	Maximum likelihood	24	0.0941442	0.180639	0.602246	-0.259908	0.448197	1.09872	0.771122	1.56549					0.941375
741	Cathepsin L2	Palindromic rheumatism	Inverse variance weighted	11	0.0467992	0.323492	0.884972	-0.587245	0.680843	1.04791	0.555857	1.97554	24.6843	0.936064	0.713203	0.946	0.982624
742	Cathepsin L2	Palindromic rheumatism	MR Egger	11	-0.266795	0.887644	0.770574	-2.00658	1.47299	0.76583	0.134448	4.36225		0.905236			1
743	Cathepsin L2	Palindromic rheumatism	Weighted median	11	-0.0758425	0.419232	0.85644	-0.897537	0.745852	0.926962	0.407572	2.10824					0.992974
744	Cathepsin L2	Palindromic rheumatism	Simple mode	11	-0.273855	0.635561	0.675691	-1.51955	0.971844	0.760443	0.21881	2.64281					1
745	Cathepsin L2	Palindromic rheumatism	Weighted mode	11	-0.0970201	0.590621	0.872793	-1.25464	1.0606	0.907538	0.285179	2.88809					0.963082
746	Cathepsin L2	Palindromic rheumatism	Maximum likelihood	11	0.0488991	0.325954	0.88075	-0.58997	0.687768	1.05011	0.554344	1.98927					0.977936
747	Cathepsin Z	Palindromic rheumatism	Inverse variance weighted	13	0.416532	0.226912	0.0664093	-0.0282164	0.86128	1.51669	0.972178	2.36619	53.4584	0.234419	0.0680507	0.308	1
748	Cathepsin Z	Palindromic rheumatism	MR Egger	13	0.924826	0.322584	0.0153255	0.292561	1.55709	2.52143	1.33985	4.745		0.441025			0.817358
749	Cathepsin Z	Palindromic rheumatism	Weighted median	13	0.624128	0.266807	0.0193227	0.101186	1.14707	1.86662	1.10648	3.14895					1
750	Cathepsin Z	Palindromic rheumatism	Simple mode	13	0.654119	0.427438	0.151862	-0.18366	1.4919	1.92345	0.832219	4.44553					1
751	Cathepsin Z	Palindromic rheumatism	Weighted mode	13	0.631885	0.255274	0.0292074	0.131548	1.13222	1.88115	1.14059	3.10254					1
752	Cathepsin Z	Palindromic rheumatism	Maximum likelihood	13	0.436012	0.205411	0.0337843	0.0334073	0.838618	1.54653	1.03397	2.31317					0.67991
753	Cathepsin B	Paget's disease (bone)	Inverse variance weighted	4	-0.346668	0.150114	0.0209238	-0.640892	-0.0524435	0.70704	0.526822	0.948908	77.359	0.86178	0.959458	0.916	1
754	Cathepsin B	Paget's disease (bone)	MR Egger	4	-0.361781	0.303152	0.35508	-0.955958	0.232396	0.696435	0.384444	1.26162		0.688995			1
755	Cathepsin B	Paget's disease (bone)	Weighted median	4	-0.343116	0.155045	0.0268968	-0.647003	-0.0392281	0.709556	0.523612	0.961531					0.537937
756	Cathepsin B	Paget's disease (bone)	Simple mode	4	-0.197708	0.24631	0.480863	-0.680475	0.285059	0.82061	0.506377	1.32984					1
757	Cathepsin B	Paget's disease (bone)	Weighted mode	4	-0.349018	0.181394	0.150034	-0.70455	0.00651404	0.70538	0.494331	1.00654					1
758	Cathepsin B	Paget's disease (bone)	Maximum likelihood	4	-0.347786	0.151726	0.0218944	-0.64517	-0.0504028	0.70625	0.524573	0.950846					1
759	Cathepsin F	Paget's disease (bone)	Inverse variance weighted	5	0.242746	0.172937	0.160418	-0.0962103	0.581703	1.27474	0.908273	1.78908	55.5208	0.219966	0.806365	0.319	0.833137
760	Cathepsin F	Paget's disease (bone)	MR Egger	5	0.0635831	0.698047	0.933165	-1.30459	1.43175	1.06565	0.271284	4.18604		0.132795			0.975858
761	Cathepsin F	Paget's disease (bone)	Weighted median	5	0.386034	0.182465	0.0343738	0.0284024	0.743665	1.47113	1.02881	2.10363					0.611089
762	Cathepsin F	Paget's disease (bone)	Simple mode	5	0.545951	0.27611	0.11917	0.00477525	1.08713	1.72625	1.00479	2.96574					1
763	Cathepsin F	Paget's disease (bone)	Weighted mode	5	0.521052	0.238991	0.0947217	0.0526295	0.989475	1.6838	1.05404	2.68982					1
764	Cathepsin F	Paget's disease (bone)	Maximum likelihood	5	0.24769	0.146601	0.0911127	-0.039647	0.535027	1.28106	0.961129	1.70749					0.564198
765	Cathepsin E	Paget's disease (bone)	Inverse variance weighted	5	0.102594	0.291637	0.724998	-0.469015	0.674203	1.10804	0.625618	1.96247	21.6519	0.547029	0.682135	0.588	0.98088
766	Cathepsin E	Paget's disease (bone)	MR Egger	5	0.724534	1.4074	0.642218	-2.03396	3.48303	2.06377	0.130816	32.5582		0.413585			1
767	Cathepsin E	Paget's disease (bone)	Weighted median	5	-0.0221995	0.378283	0.953203	-0.763634	0.719235	0.978045	0.46597	2.05286					1
768	Cathepsin E	Paget's disease (bone)	Simple mode	5	-0.242465	0.53639	0.674675	-1.29379	0.80886	0.784691	0.274229	2.24535					1
769	Cathepsin E	Paget's disease (bone)	Weighted mode	5	-0.148545	0.503971	0.78285	-1.13633	0.839239	0.861961	0.320995	2.3146					1
770	Cathepsin E	Paget's disease (bone)	Maximum likelihood	5	0.105413	0.295708	0.721484	-0.474174	0.685	1.11117	0.622399	1.98377					0.944382
771	Cathepsin H	Paget's disease (bone)	Inverse variance weighted	5	0.179321	0.231891	0.439345	-0.275185	0.633828	1.1964	0.759431	1.88481	22.0297	0.823604	0.405578	0.837	1
772	Cathepsin H	Paget's disease (bone)	MR Egger	5	0.912058	0.793667	0.333796	-0.643528	2.46764	2.48944	0.525435	11.7946		0.899808			1
773	Cathepsin H	Paget's disease (bone)	Weighted median	5	0.169423	0.297369	0.568854	-0.41342	0.752266	1.18462	0.661384	2.1218					1
774	Cathepsin H	Paget's disease (bone)	Simple mode	5	0.184687	0.3713	0.645003	-0.543062	0.912436	1.20284	0.580967	2.49038					1
775	Cathepsin H	Paget's disease (bone)	Weighted mode	5	0.151336	0.378423	0.709657	-0.590373	0.893045	1.16339	0.554121	2.44256					1
776	Cathepsin H	Paget's disease (bone)	Maximum likelihood	5	0.181827	0.234156	0.437441	-0.277119	0.640773	1.19941	0.757965	1.89795					0.951729
777	Cathepsin O	Paget's disease (bone)	Inverse variance weighted	6	-0.190699	0.22421	0.395027	-0.630152	0.248753	0.826381	0.532511	1.28243	22.9916	0.506702	0.348135	0.545	1
778	Cathepsin O	Paget's disease (bone)	MR Egger	6	-1.23546	1.00907	0.287996	-3.21325	0.742319	0.2907	0.0402259	2.1008		0.528967			1
779	Cathepsin O	Paget's disease (bone)	Weighted median	6	-0.0831942	0.295684	0.778433	-0.662735	0.496347	0.920172	0.51544	1.64271					1
780	Cathepsin O	Paget's disease (bone)	Simple mode	6	0.00958708	0.402459	0.981917	-0.779232	0.798407	1.00963	0.458758	2.222					1
781	Cathepsin O	Paget's disease (bone)	Weighted mode	6	0.029122	0.398768	0.944614	-0.752463	0.810707	1.02955	0.471205	2.2495					0.968835
782	Cathepsin O	Paget's disease (bone)	Maximum likelihood	6	-0.196582	0.228856	0.390355	-0.64514	0.251977	0.821534	0.524589	1.28657					0.997574
783	Cathepsin S	Paget's disease (bone)	Inverse variance weighted	12	0.270151	0.223512	0.226793	-0.167933	0.708234	1.31016	0.84541	2.0304	23.4242	0.0157972	0.276584	0.015	0.869373
784	Cathepsin S	Paget's disease (bone)	MR Egger	12	-0.572824	0.764911	0.47118	-2.07205	0.926403	0.563931	0.125927	2.52541		0.0239472			1
785	Cathepsin S	Paget's disease (bone)	Weighted median	12	0.378487	0.235199	0.107568	-0.0825032	0.839478	1.46007	0.920808	2.31516					0.905838
786	Cathepsin S	Paget's disease (bone)	Simple mode	12	0.358187	0.347365	0.324609	-0.32265	1.03902	1.43073	0.724227	2.82645					1
787	Cathepsin S	Paget's disease (bone)	Weighted mode	12	0.392357	0.353195	0.290313	-0.299906	1.08462	1.48047	0.740888	2.95831					0.988299
788	Cathepsin S	Paget's disease (bone)	Maximum likelihood	12	0.292222	0.160906	0.0693544	-0.0231536	0.607597	1.3394	0.977112	1.83602					0.656827
789	Cathepsin L2	Paget's disease (bone)	Inverse variance weighted	5	-0.128259	0.221573	0.562686	-0.562543	0.306025	0.879626	0.569759	1.35802	23.3808	0.773287	0.868638	0.767	1
790	Cathepsin L2	Paget's disease (bone)	MR Egger	5	-0.257095	0.749338	0.754161	-1.7258	1.21161	0.773295	0.178031	3.35888		0.622974			1
791	Cathepsin L2	Paget's disease (bone)	Weighted median	5	-0.240573	0.28429	0.397429	-0.797782	0.316636	0.786177	0.450327	1.3725					1
792	Cathepsin L2	Paget's disease (bone)	Simple mode	5	-0.336864	0.369601	0.41363	-1.06128	0.387554	0.714006	0.346012	1.47337					1
793	Cathepsin L2	Paget's disease (bone)	Weighted mode	5	-0.351803	0.378879	0.405688	-1.09441	0.3908	0.703419	0.334739	1.47816					1
794	Cathepsin L2	Paget's disease (bone)	Maximum likelihood	5	-0.130288	0.223544	0.560008	-0.568436	0.307859	0.877842	0.566411	1.36051					0.969476
795	Cathepsin Z	Paget's disease (bone)	Inverse variance weighted	6	0.0742819	0.143232	0.604031	-0.206453	0.355017	1.07711	0.813465	1.4262	50.4702	0.773011	0.982471	0.815	1
796	Cathepsin Z	Paget's disease (bone)	MR Egger	6	0.081116	0.325573	0.815516	-0.557007	0.719239	1.0845	0.572921	2.05287		0.640601			0.988505
797	Cathepsin Z	Paget's disease (bone)	Weighted median	6	0.0310085	0.162426	0.848597	-0.287346	0.349363	1.03149	0.750252	1.41816					1
798	Cathepsin Z	Paget's disease (bone)	Simple mode	6	-0.0261454	0.234011	0.915386	-0.484806	0.432515	0.974193	0.615817	1.54113					1
799	Cathepsin Z	Paget's disease (bone)	Weighted mode	6	0.016785	0.17034	0.925333	-0.317081	0.350651	1.01693	0.728272	1.41999					0.974035
800	Cathepsin Z	Paget's disease (bone)	Maximum likelihood	6	0.0747526	0.143753	0.603058	-0.207002	0.356507	1.07762	0.813018	1.42833					0.933579
801	Cathepsin B	Rheumatism	Inverse variance weighted	17	-0.0288729	0.0533216	0.588173	-0.133383	0.0756375	0.97154	0.87513	1.07857	35.5021	0.375048	0.285859	0.394	1
802	Cathepsin B	Rheumatism	MR Egger	17	0.0944669	0.123388	0.455789	-0.147374	0.336308	1.09907	0.862971	1.39977		0.390842			1
803	Cathepsin B	Rheumatism	Weighted median	17	0.04243	0.0714127	0.55241	-0.0975389	0.182399	1.04334	0.907067	1.20009					1
804	Cathepsin B	Rheumatism	Simple mode	17	0.0101555	0.126968	0.937241	-0.238702	0.259013	1.01021	0.78765	1.29565					1
805	Cathepsin B	Rheumatism	Weighted mode	17	0.039914	0.0864465	0.650498	-0.129521	0.209349	1.04072	0.878516	1.23288					1
806	Cathepsin B	Rheumatism	Maximum likelihood	17	-0.0290205	0.0525844	0.581027	-0.132086	0.0740449	0.971397	0.876266	1.07686					0.954545
807	Cathepsin F	Rheumatism	Inverse variance weighted	12	0.0871439	0.0529388	0.0997381	-0.0166162	0.190904	1.09105	0.983521	1.21034	36.6058	0.824821	0.874875	0.788	0.729902
808	Cathepsin F	Rheumatism	MR Egger	12	0.0689986	0.124168	0.590639	-0.174371	0.312368	1.07143	0.839985	1.36666		0.758197			1
809	Cathepsin F	Rheumatism	Weighted median	12	0.161384	0.0708392	0.0227166	0.0225388	0.300228	1.17514	1.02279	1.35017					0.605775
810	Cathepsin F	Rheumatism	Simple mode	12	-0.0470231	0.120826	0.704571	-0.283842	0.189796	0.954065	0.752886	1.209					1
811	Cathepsin F	Rheumatism	Weighted mode	12	0.19978	0.0891174	0.0465571	0.0251101	0.37445	1.22113	1.02543	1.45419					1
812	Cathepsin F	Rheumatism	Maximum likelihood	12	0.0888972	0.0536956	0.0978073	-0.0163461	0.194141	1.09297	0.983787	1.21427					0.562392
813	Cathepsin G	Rheumatism	Inverse variance weighted	13	0.0358612	0.0595839	0.547267	-0.0809232	0.152646	1.03651	0.922265	1.16491	22.9823	0.952288	0.867556	0.893	1
814	Cathepsin G	Rheumatism	MR Egger	13	0.0527545	0.115515	0.656781	-0.173656	0.279165	1.05417	0.840586	1.32203		0.924477			1
815	Cathepsin G	Rheumatism	Weighted median	13	0.0394732	0.0837953	0.637593	-0.124766	0.203712	1.04026	0.882704	1.22594					1
816	Cathepsin G	Rheumatism	Simple mode	13	0.0357231	0.135031	0.795842	-0.228938	0.300385	1.03637	0.795378	1.35038					1
817	Cathepsin G	Rheumatism	Weighted mode	13	0.11961	0.0980008	0.245717	-0.0724717	0.311691	1.12706	0.930092	1.36573					1
818	Cathepsin G	Rheumatism	Maximum likelihood	13	0.0373038	0.0601529	0.535159	-0.0805958	0.155204	1.03801	0.922566	1.1679					1
819	Cathepsin E	Rheumatism	Inverse variance weighted	10	0.00245838	0.0668237	0.970653	-0.128516	0.133433	1.00246	0.879399	1.14274	21.973	0.158479	0.920914	0.187	0.97672
820	Cathepsin E	Rheumatism	MR Egger	10	0.0122073	0.118619	0.920565	-0.220285	0.2447	1.01228	0.80229	1.27724		0.109294			0.995206
821	Cathepsin E	Rheumatism	Weighted median	10	-0.0325413	0.0739739	0.660008	-0.17753	0.112448	0.967982	0.837336	1.11901					1
822	Cathepsin E	Rheumatism	Simple mode	10	-0.0736132	0.107521	0.510816	-0.284355	0.137128	0.929031	0.7525	1.14698					1
823	Cathepsin E	Rheumatism	Weighted mode	10	-0.0214187	0.0897065	0.816636	-0.197243	0.154406	0.978809	0.820991	1.16696					0.967865
824	Cathepsin E	Rheumatism	Maximum likelihood	10	0.0025602	0.0565923	0.963916	-0.108361	0.113481	1.00256	0.897304	1.12017					0.969941
825	Cathepsin H	Rheumatism	Inverse variance weighted	11	-0.00738376	0.0331387	0.823681	-0.0723357	0.0575682	0.992643	0.930219	1.05926	126.485	0.790745	0.363841	0.783	0.982315
826	Cathepsin H	Rheumatism	MR Egger	11	0.0225003	0.0455463	0.633131	-0.0667704	0.111771	1.02276	0.93541	1.11826		0.800878			1
827	Cathepsin H	Rheumatism	Weighted median	11	0.00313995	0.0358499	0.930206	-0.0671258	0.0734057	1.00314	0.935078	1.07617					1
828	Cathepsin H	Rheumatism	Simple mode	11	-0.165364	0.0961529	0.116209	-0.353824	0.0230957	0.847585	0.701999	1.02336					1
829	Cathepsin H	Rheumatism	Weighted mode	11	0.00760443	0.0361141	0.837454	-0.0631792	0.078388	1.00763	0.938775	1.08154					0.970961
830	Cathepsin H	Rheumatism	Maximum likelihood	11	-0.00734465	0.0332131	0.824986	-0.0724423	0.057753	0.992682	0.930119	1.05945					0.976637
831	Cathepsin O	Rheumatism	Inverse variance weighted	12	0.0838304	0.0677138	0.215712	-0.0488887	0.21655	1.08744	0.952287	1.24178	23.2138	0.775961	0.143953	0.761	0.890505
832	Cathepsin O	Rheumatism	MR Egger	12	-0.139653	0.156382	0.392827	-0.446161	0.166855	0.86966	0.640081	1.18158		0.906213			1
833	Cathepsin O	Rheumatism	Weighted median	12	0.0816165	0.0901547	0.36531	-0.0950867	0.25832	1.08504	0.909294	1.29475					1
834	Cathepsin O	Rheumatism	Simple mode	12	0.205916	0.14145	0.173401	-0.0713258	0.483157	1.22865	0.931158	1.62118					1
835	Cathepsin O	Rheumatism	Weighted mode	12	0.192933	0.140445	0.196872	-0.0823384	0.468205	1.2128	0.92096	1.59712					1
836	Cathepsin O	Rheumatism	Maximum likelihood	12	0.087531	0.0688906	0.203878	-0.0474946	0.222557	1.09148	0.953616	1.24927					0.729431
837	Cathepsin S	Rheumatism	Inverse variance weighted	24	-0.01381	0.0525808	0.792825	-0.116868	0.0892483	0.986285	0.889702	1.09335	39.7152	0.0382759	0.668782	0.053	0.989495
838	Cathepsin S	Rheumatism	MR Egger	24	-0.0464664	0.0923985	0.620038	-0.227567	0.134635	0.954597	0.796469	1.14412		0.0302938			1
839	Cathepsin S	Rheumatism	Weighted median	24	0.0279438	0.061665	0.650438	-0.0929197	0.148807	1.02834	0.911267	1.16045					1
840	Cathepsin S	Rheumatism	Simple mode	24	0.0120448	0.141798	0.933042	-0.265879	0.289968	1.01212	0.766532	1.33638					1
841	Cathepsin S	Rheumatism	Weighted mode	24	0.029559	0.066849	0.662492	-0.101465	0.160583	1.03	0.903513	1.1742					1
842	Cathepsin S	Rheumatism	Maximum likelihood	24	-0.0143722	0.0427752	0.736876	-0.0982115	0.0694671	0.985731	0.906457	1.07194					0.926852
843	Cathepsin L2	Rheumatism	Inverse variance weighted	11	0.039939	0.0762621	0.600482	-0.109535	0.189413	1.04075	0.896251	1.20854	24.6843	0.682506	0.478145	0.66	1
844	Cathepsin L2	Rheumatism	MR Egger	11	-0.103344	0.208097	0.631365	-0.511214	0.304526	0.901817	0.599767	1.35598		0.647411			1
845	Cathepsin L2	Rheumatism	Weighted median	11	0.00142234	0.10705	0.989399	-0.208395	0.21124	1.00142	0.811886	1.23521					1
846	Cathepsin L2	Rheumatism	Simple mode	11	-0.0760189	0.186306	0.691849	-0.441178	0.28914	0.926799	0.643278	1.33528					1
847	Cathepsin L2	Rheumatism	Weighted mode	11	-0.0760189	0.163003	0.650947	-0.395504	0.243467	0.926799	0.67334	1.27566					1
848	Cathepsin L2	Rheumatism	Maximum likelihood	11	0.0415154	0.0776667	0.592973	-0.110711	0.193742	1.04239	0.895197	1.21378					0.945234
849	Cathepsin Z	Rheumatism	Inverse variance weighted	13	0.033301	0.0570621	0.559495	-0.0785408	0.145143	1.03386	0.924464	1.1562	53.4584	0.141764	0.266859	0.18	1
850	Cathepsin Z	Rheumatism	MR Egger	13	0.115132	0.0897428	0.225896	-0.0607642	0.291028	1.12202	0.941045	1.3378		0.168789			1
851	Cathepsin Z	Rheumatism	Weighted median	13	0.0195653	0.066965	0.770155	-0.111686	0.150817	1.01976	0.894325	1.16278					1
852	Cathepsin Z	Rheumatism	Simple mode	13	-0.232542	0.138757	0.119597	-0.504505	0.039422	0.792517	0.603804	1.04021					1
853	Cathepsin Z	Rheumatism	Weighted mode	13	0.0839496	0.0659473	0.227134	-0.0453071	0.213206	1.08757	0.955704	1.23764					1
854	Cathepsin Z	Rheumatism	Maximum likelihood	13	0.0335021	0.0483865	0.488695	-0.0613355	0.12834	1.03407	0.940508	1.13694					0.995948
855	Cathepsin B	Knee arthritis	Inverse variance weighted	19	-0.00148008	0.0181223	0.934908	-0.0369997	0.0340396	0.998521	0.963676	1.03463	34.3177	0.105063	0.0028605	0.072	0.964873
856	Cathepsin B	Knee arthritis	MR Egger	19	-0.115156	0.0359984	0.00525994	-0.185713	-0.0445986	0.891227	0.830512	0.956381		0.691226			0.84159
857	Cathepsin B	Knee arthritis	Weighted median	19	-0.0365025	0.020174	0.0703911	-0.0760435	0.00303849	0.964156	0.926776	1.00304					0.662505
858	Cathepsin B	Knee arthritis	Simple mode	19	0.0277731	0.0549227	0.61922	-0.0798754	0.135422	1.02816	0.923231	1.14502					1
859	Cathepsin B	Knee arthritis	Weighted mode	19	-0.0589897	0.0246491	0.0278136	-0.107302	-0.0106774	0.942717	0.898254	0.989379					1
860	Cathepsin B	Knee arthritis	Maximum likelihood	19	-0.00147336	0.0154591	0.924071	-0.0317732	0.0288264	0.998528	0.968726	1.02925					0.966074
861	Cathepsin F	Knee arthritis	Inverse variance weighted	13	-0.0206997	0.0268679	0.441048	-0.0733607	0.0319614	0.979513	0.929266	1.03248	35.6997	0.00604307	0.0856546	0.008	1
862	Cathepsin F	Knee arthritis	MR Egger	13	0.0833068	0.0602419	0.194131	-0.0347673	0.201381	1.08688	0.96583	1.22309		0.0339127			1
863	Cathepsin F	Knee arthritis	Weighted median	13	-0.0108349	0.0265798	0.68354	-0.0629312	0.0412614	0.989224	0.939008	1.04212					1
864	Cathepsin F	Knee arthritis	Simple mode	13	0.00109859	0.0489165	0.982451	-0.0947778	0.096975	1.0011	0.909575	1.10183					1
865	Cathepsin F	Knee arthritis	Weighted mode	13	-0.0133996	0.032777	0.68988	-0.0776425	0.0508433	0.98669	0.925295	1.05216					1
866	Cathepsin F	Knee arthritis	Maximum likelihood	13	-0.0211964	0.0182602	0.245723	-0.0569863	0.0145935	0.979027	0.944607	1.0147					0.807376
867	Cathepsin G	Knee arthritis	Inverse variance weighted	15	0.00430573	0.0287599	0.880991	-0.0520637	0.0606752	1.00432	0.949268	1.06255	22.8206	0.0266634	0.553617	0.28	0.99887
868	Cathepsin G	Knee arthritis	MR Egger	15	-0.029412	0.0627764	0.647172	-0.152454	0.0936298	0.971016	0.858598	1.09815		0.0218403			1
869	Cathepsin G	Knee arthritis	Weighted median	15	0.0138573	0.0308636	0.653444	-0.0466355	0.07435	1.01395	0.954435	1.07718					1
870	Cathepsin G	Knee arthritis	Simple mode	15	0.007293	0.0498324	0.885731	-0.0903785	0.104965	1.00732	0.913585	1.11067					1
871	Cathepsin G	Knee arthritis	Weighted mode	15	0.007293	0.0474804	0.880117	-0.0857686	0.100355	1.00732	0.917807	1.10556					0.964512
872	Cathepsin G	Knee arthritis	Maximum likelihood	15	0.00475525	0.022043	0.829201	-0.0384491	0.0479596	1.00477	0.962281	1.04913					0.967402
873	Cathepsin E	Knee arthritis	Inverse variance weighted	11	0.00917931	0.0241798	0.704223	-0.0382132	0.0565718	1.00922	0.962508	1.0582	21.9151	0.854118	0.393555	0.843	1
874	Cathepsin E	Knee arthritis	MR Egger	11	-0.0340081	0.0539222	0.543925	-0.139696	0.0716794	0.966564	0.869623	1.07431		0.858527			1
875	Cathepsin E	Knee arthritis	Weighted median	11	0.0185041	0.0317386	0.559884	-0.0437037	0.0807118	1.01868	0.957238	1.08406					1
876	Cathepsin E	Knee arthritis	Simple mode	11	0.0248723	0.0505938	0.633608	-0.0742915	0.124036	1.02518	0.928401	1.13206					1
877	Cathepsin E	Knee arthritis	Weighted mode	11	0.0248723	0.0524353	0.645443	-0.0779009	0.127645	1.02518	0.925056	1.13615					1
878	Cathepsin E	Knee arthritis	Maximum likelihood	11	0.00945469	0.0244656	0.699164	-0.0384978	0.0574072	1.0095	0.962234	1.05909					0.97883
879	Cathepsin H	Knee arthritis	Inverse variance weighted	11	0.00247538	0.0177651	0.889182	-0.0323442	0.0372949	1.00248	0.968173	1.038	126.485	0.00622253	0.608654	0.074	0.973866
880	Cathepsin H	Knee arthritis	MR Egger	11	-0.00691424	0.0255616	0.792882	-0.057015	0.0431866	0.99311	0.94458	1.04413		0.00458607			0.98342
881	Cathepsin H	Knee arthritis	Weighted median	11	0.000631469	0.0125618	0.959908	-0.0239897	0.0252526	1.00063	0.976296	1.02557					1
882	Cathepsin H	Knee arthritis	Simple mode	11	-0.0615146	0.0477693	0.226837	-0.155143	0.0321132	0.940339	0.856293	1.03263					1
883	Cathepsin H	Knee arthritis	Weighted mode	11	-0.00257333	0.012371	0.839394	-0.0268205	0.0216739	0.99743	0.973536	1.02191					0.966209
884	Cathepsin H	Knee arthritis	Maximum likelihood	11	0.00252534	0.0114645	0.825658	-0.0199451	0.0249958	1.00253	0.980252	1.02531					0.970298
885	Cathepsin O	Knee arthritis	Inverse variance weighted	12	0.075331	0.0229927	0.00105177	0.0302653	0.120397	1.07824	1.03073	1.12794	23.2138	0.993849	0.564265	0.998	0.169336
886	Cathepsin O	Knee arthritis	MR Egger	12	0.0489649	0.0498409	0.349062	-0.0487232	0.146653	1.05018	0.952445	1.15795		0.9926			1
887	Cathepsin O	Knee arthritis	Weighted median	12	0.0664902	0.0293114	0.0233045	0.00903979	0.123941	1.06875	1.00908	1.13195					0.532675
888	Cathepsin O	Knee arthritis	Simple mode	12	0.0553502	0.0439621	0.234078	-0.0308156	0.141516	1.05691	0.969654	1.15202					1
889	Cathepsin O	Knee arthritis	Weighted mode	12	0.054857	0.044809	0.246435	-0.0329686	0.142683	1.05639	0.967569	1.15336					1
890	Cathepsin O	Knee arthritis	Maximum likelihood	12	0.0760089	0.0235365	0.00124047	0.0298774	0.12214	1.07897	1.03033	1.12991					0.199715
891	Cathepsin S	Knee arthritis	Inverse variance weighted	24	-0.00646782	0.0165301	0.695594	-0.0388669	0.0259312	0.993553	0.961879	1.02627	39.7152	0.0158408	0.137781	0.026	1
892	Cathepsin S	Knee arthritis	MR Egger	24	-0.0399069	0.0270045	0.153639	-0.0928358	0.0130219	0.960879	0.911343	1.01311		0.030359			1
893	Cathepsin S	Knee arthritis	Weighted median	24	-0.0203833	0.0177086	0.249717	-0.0550922	0.0143256	0.979823	0.946398	1.01443					1
894	Cathepsin S	Knee arthritis	Simple mode	24	-0.0375361	0.0409787	0.369177	-0.117854	0.0427822	0.96316	0.888825	1.04371					1
895	Cathepsin S	Knee arthritis	Weighted mode	24	-0.0230071	0.0191146	0.240971	-0.0604717	0.0144575	0.977256	0.94132	1.01456					1
896	Cathepsin S	Knee arthritis	Maximum likelihood	24	-0.0067933	0.0128426	0.596828	-0.0319647	0.0183781	0.99323	0.968541	1.01855					0.942052
897	Cathepsin L2	Knee arthritis	Inverse variance weighted	11	-0.0133322	0.0285072	0.640014	-0.0692064	0.0425419	0.986756	0.933134	1.04346	24.6843	0.115116	0.603995	0.115	0.990791
898	Cathepsin L2	Knee arthritis	MR Egger	11	0.0197788	0.0683411	0.778821	-0.11417	0.153727	1.01998	0.892107	1.16617		0.0906453			0.996891
899	Cathepsin L2	Knee arthritis	Weighted median	11	-0.011946	0.0314632	0.704183	-0.0736139	0.049722	0.988125	0.92903	1.05098					1
900	Cathepsin L2	Knee arthritis	Simple mode	11	-0.0169943	0.0514515	0.747991	-0.117839	0.0838506	0.983149	0.888839	1.08747					1
901	Cathepsin L2	Knee arthritis	Weighted mode	11	-0.0126905	0.046876	0.792108	-0.104568	0.0791864	0.98739	0.900714	1.08241					0.997931
902	Cathepsin L2	Knee arthritis	Maximum likelihood	11	-0.0138649	0.0236125	0.55708	-0.0601453	0.0324156	0.986231	0.941628	1.03295					0.97489
903	Cathepsin Z	Knee arthritis	Inverse variance weighted	13	0.0126939	0.0150696	0.399591	-0.0168425	0.0422302	1.01277	0.983299	1.04313	53.4584	0.959401	0.249982	0.953	1
904	Cathepsin Z	Knee arthritis	MR Egger	13	-0.00922924	0.0235145	0.702193	-0.0553176	0.0368591	0.990813	0.946185	1.03755		0.982705			1
905	Cathepsin Z	Knee arthritis	Weighted median	13	0.00627385	0.0188169	0.73882	-0.0306072	0.0431549	1.00629	0.969856	1.0441					1
906	Cathepsin Z	Knee arthritis	Simple mode	13	0.00430984	0.0309682	0.891624	-0.0563877	0.0650074	1.00432	0.945173	1.06717					1
907	Cathepsin Z	Knee arthritis	Weighted mode	13	0.00562835	0.0192578	0.775077	-0.032117	0.0433737	1.00564	0.968393	1.04433					1
908	Cathepsin Z	Knee arthritis	Maximum likelihood	13	0.012718	0.015133	0.400676	-0.0169427	0.0423786	1.0128	0.9832	1.04329					0.992443
909	Cathepsin B	Hip arthritis	Inverse variance weighted	19	-0.0441881	0.0241472	0.0672581	-0.0915167	0.00314046	0.956774	0.912546	1.00315	34.3177	0.0504976	0.164848	0.075	0.984414
910	Cathepsin B	Hip arthritis	MR Egger	19	-0.117442	0.0556448	0.0499272	-0.226506	-0.00837825	0.889192	0.797315	0.991657		0.0810582			0.887595
911	Cathepsin B	Hip arthritis	Weighted median	19	-0.068549	0.0285783	0.0164561	-0.124562	-0.0125356	0.933748	0.882883	0.987543					1
912	Cathepsin B	Hip arthritis	Simple mode	19	-0.0268777	0.0478302	0.581088	-0.120625	0.0668695	0.97348	0.886366	1.06916					1
913	Cathepsin B	Hip arthritis	Weighted mode	19	-0.0645991	0.0281672	0.0340789	-0.119807	-0.00939144	0.937443	0.887092	0.990653					1
914	Cathepsin B	Hip arthritis	Maximum likelihood	19	-0.0444664	0.019555	0.0229713	-0.0827942	-0.00613854	0.956508	0.920541	0.99388					0.924596
915	Cathepsin F	Hip arthritis	Inverse variance weighted	13	-0.0311727	0.0301373	0.300969	-0.0902418	0.0278963	0.969308	0.91371	1.02829	35.6997	0.0374026	0.64601	0.064	1
916	Cathepsin F	Hip arthritis	MR Egger	13	0.00216855	0.077179	0.978088	-0.149102	0.153439	1.00217	0.861481	1.16584		0.0278965			0.978088
917	Cathepsin F	Hip arthritis	Weighted median	13	-0.0658133	0.032715	0.0442502	-0.129935	-0.0016918	0.936306	0.878153	0.99831					0.544618
918	Cathepsin F	Hip arthritis	Simple mode	13	-0.0465105	0.056839	0.429145	-0.157915	0.0648939	0.954555	0.853923	1.06705					1
919	Cathepsin F	Hip arthritis	Weighted mode	13	-0.0611983	0.0379864	0.133141	-0.135652	0.0132551	0.940637	0.873147	1.01334					1
920	Cathepsin F	Hip arthritis	Maximum likelihood	13	-0.0314947	0.0228817	0.168694	-0.0763428	0.0133535	0.968996	0.926499	1.01344					0.734046
921	Cathepsin G	Hip arthritis	Inverse variance weighted	15	0.0146933	0.029739	0.621253	-0.0435951	0.0729817	1.0148	0.957342	1.07571	22.8206	0.243339	0.120979	0.245	1
922	Cathepsin G	Hip arthritis	MR Egger	15	-0.0733399	0.0600072	0.243336	-0.190954	0.0442743	0.929285	0.826171	1.04527		0.357753			1
923	Cathepsin G	Hip arthritis	Weighted median	15	-0.00768357	0.0391103	0.844251	-0.0843398	0.0689727	0.992346	0.919119	1.07141					1
924	Cathepsin G	Hip arthritis	Simple mode	15	-0.0320834	0.0673314	0.64107	-0.164053	0.0998862	0.968426	0.848697	1.10505					1
925	Cathepsin G	Hip arthritis	Weighted mode	15	-0.0256393	0.0650332	0.699337	-0.153104	0.101826	0.974687	0.85804	1.10719					1
926	Cathepsin G	Hip arthritis	Maximum likelihood	15	0.0156375	0.0275619	0.570471	-0.0383839	0.0696589	1.01576	0.962343	1.07214					0.956727
927	Cathepsin E	Hip arthritis	Inverse variance weighted	11	0.0193366	0.0303298	0.52377	-0.0401097	0.0787829	1.01952	0.960684	1.08197	21.9151	0.704885	0.230543	0.706	1
928	Cathepsin E	Hip arthritis	MR Egger	11	-0.0580197	0.0673667	0.411457	-0.190058	0.0740189	0.943631	0.826911	1.07683		0.782784			1
929	Cathepsin E	Hip arthritis	Weighted median	11	0.0323459	0.0410658	0.430895	-0.0481431	0.112835	1.03287	0.952997	1.11945					1
930	Cathepsin E	Hip arthritis	Simple mode	11	0.0198526	0.060278	0.748684	-0.0982922	0.137997	1.02005	0.906384	1.14797					1
931	Cathepsin E	Hip arthritis	Weighted mode	11	0.0220502	0.0640548	0.737795	-0.103497	0.147598	1.0223	0.901679	1.15905					1
932	Cathepsin E	Hip arthritis	Maximum likelihood	11	0.0194114	0.0307928	0.52844	-0.0409424	0.0797653	1.0196	0.959884	1.08303					1
933	Cathepsin H	Hip arthritis	Inverse variance weighted	11	-0.0188486	0.0170078	0.267761	-0.052184	0.0144867	0.981328	0.949154	1.01459	126.485	0.166232	0.42935	0.327	0.937162
934	Cathepsin H	Hip arthritis	MR Egger	11	-0.00511873	0.0239579	0.835577	-0.0520761	0.0418387	0.994894	0.949257	1.04273		0.155931			0.997704
935	Cathepsin H	Hip arthritis	Weighted median	11	-0.00959355	0.0161422	0.552302	-0.0412323	0.0220452	0.990452	0.959606	1.02229					1
936	Cathepsin H	Hip arthritis	Simple mode	11	-0.0319089	0.0472412	0.514706	-0.124502	0.0606838	0.968595	0.882937	1.06256					1
937	Cathepsin H	Hip arthritis	Weighted mode	11	-0.00899848	0.0164071	0.595414	-0.0411564	0.0231594	0.991042	0.959679	1.02343					1
938	Cathepsin H	Hip arthritis	Maximum likelihood	11	-0.0191088	0.0143965	0.184401	-0.0473258	0.00910828	0.981073	0.953777	1.00915					0.706872
939	Cathepsin O	Hip arthritis	Inverse variance weighted	12	-0.0267494	0.0289651	0.355745	-0.083521	0.0300222	0.973605	0.919872	1.03048	23.2138	0.512434	0.581332	0.496	1
940	Cathepsin O	Hip arthritis	MR Egger	12	0.00484783	0.0625549	0.939757	-0.11776	0.127455	1.00486	0.88891	1.13593		0.451449			0.970071
941	Cathepsin O	Hip arthritis	Weighted median	12	-0.050502	0.0371261	0.17374	-0.123269	0.0222651	0.950752	0.884026	1.02251					0.896722
942	Cathepsin O	Hip arthritis	Simple mode	12	-0.0671338	0.0672938	0.339902	-0.19903	0.0647621	0.93507	0.819526	1.06691					1
943	Cathepsin O	Hip arthritis	Weighted mode	12	-0.0695975	0.05948	0.266688	-0.186178	0.0469833	0.932769	0.830126	1.0481					1
944	Cathepsin O	Hip arthritis	Maximum likelihood	12	-0.0276798	0.0295891	0.349545	-0.0856743	0.0303148	0.9727	0.917893	1.03078					0.922569
945	Cathepsin S	Hip arthritis	Inverse variance weighted	24	0.00639718	0.0201283	0.750622	-0.0330544	0.0458487	1.00642	0.967486	1.04692	39.7152	0.0279693	0.474196	0.048	0.974598
946	Cathepsin S	Hip arthritis	MR Egger	24	-0.0135923	0.0341646	0.694576	-0.0805548	0.0533702	0.9865	0.922604	1.05482		0.0252932			1
947	Cathepsin S	Hip arthritis	Weighted median	24	-0.00690501	0.0224734	0.758651	-0.0509529	0.0371429	0.993119	0.950323	1.03784					1
948	Cathepsin S	Hip arthritis	Simple mode	24	0.0725806	0.0527561	0.182142	-0.0308215	0.175983	1.07528	0.969649	1.19242					1
949	Cathepsin S	Hip arthritis	Weighted mode	24	-0.00582924	0.0236594	0.807572	-0.0522016	0.0405431	0.994188	0.949138	1.04138					0.971516
950	Cathepsin S	Hip arthritis	Maximum likelihood	24	0.00658338	0.016082	0.682272	-0.0249373	0.038104	1.00661	0.975371	1.03884					0.96356
951	Cathepsin L2	Hip arthritis	Inverse variance weighted	11	-0.0239848	0.0287686	0.404441	-0.0803714	0.0324017	0.976301	0.922774	1.03293	24.6843	0.52132	0.855913	0.509	1
952	Cathepsin L2	Hip arthritis	MR Egger	11	-0.0352043	0.0666318	0.610042	-0.165803	0.095394	0.965408	0.847213	1.10009		0.430034			1
953	Cathepsin L2	Hip arthritis	Weighted median	11	-0.0199082	0.0399734	0.618459	-0.0982559	0.0584396	0.980289	0.906417	1.06018					1
954	Cathepsin L2	Hip arthritis	Simple mode	11	-0.0204748	0.0715497	0.780595	-0.160712	0.119763	0.979733	0.851537	1.12723					1
955	Cathepsin L2	Hip arthritis	Weighted mode	11	-0.0248637	0.0707508	0.73256	-0.163535	0.113808	0.975443	0.849137	1.12054					1
956	Cathepsin L2	Hip arthritis	Maximum likelihood	11	-0.0243054	0.0293001	0.406803	-0.0817337	0.0331229	0.975988	0.921517	1.03368					0.977542
957	Cathepsin Z	Hip arthritis	Inverse variance weighted	13	0.00162517	0.0220678	0.941293	-0.0416277	0.044878	1.00163	0.959227	1.0459	53.4584	0.177887	0.100161	0.198	0.965275
958	Cathepsin Z	Hip arthritis	MR Egger	13	-0.0419135	0.0316116	0.21175	-0.103872	0.0200452	0.958953	0.90134	1.02025		0.319764			1
959	Cathepsin Z	Hip arthritis	Weighted median	13	-0.0188805	0.0266073	0.477954	-0.0710309	0.0332699	0.981297	0.931433	1.03383					1
960	Cathepsin Z	Hip arthritis	Simple mode	13	-0.00014863	0.0491907	0.997639	-0.0965625	0.0962652	0.999851	0.907953	1.10105					0.997639
961	Cathepsin Z	Hip arthritis	Weighted mode	13	-0.0274654	0.0253286	0.299509	-0.0771095	0.0221786	0.972908	0.925789	1.02243					0.998364
962	Cathepsin Z	Hip arthritis	Maximum likelihood	13	0.00166439	0.0191709	0.930816	-0.0359106	0.0392394	1.00167	0.964727	1.04002					0.96065
963	Cathepsin S	Rheumatoid arthritis	Inverse variance weighted	24	0.000585504	0.000211172	0.00556041	0.000171606	0.000999402	1.00059	1.00017	1.001	39.7152	0.799906	0.88724	0.819	0.247438
964	Cathepsin S	Rheumatoid arthritis	MR Egger	24	0.000626337	0.000354425	0.0910669	-6.83e-05	0.00132101	1.00063	0.999932	1.00132		0.754033			1
965	Cathepsin S	Rheumatoid arthritis	Weighted median	24	0.000528014	0.000295955	0.0744073	-5.21e-05	0.00110809	1.00053	0.999948	1.00111					1
966	Cathepsin S	Rheumatoid arthritis	Simple mode	24	0.000686176	0.000554493	0.228393	-0.000400631	0.00177298	1.00069	0.999599	1.00177					1
967	Cathepsin S	Rheumatoid arthritis	Weighted mode	24	0.000536706	0.000313832	0.100693	-7.84e-05	0.00115182	1.00054	0.999922	1.00115					1
968	Cathepsin S	Rheumatoid arthritis	Maximum likelihood	24	0.000594039	0.000214084	0.00552374	0.000174434	0.00101365	1.00059	1.00017	1.00101					0.245806
969	Cathepsin F	Rheumatoid arthritis	Inverse variance weighted	12	-1.61e-05	0.000304413	0.957799	-0.000612757	0.000580541	0.999984	0.999387	1.00058	36.6058	0.865759	0.179251	0.884	0.979817
970	Cathepsin F	Rheumatoid arthritis	MR Egger	12	-0.00101372	0.000754836	0.208968	-0.0024932	0.000465758	0.998987	0.99751	1.00047		0.946145			0.999656
971	Cathepsin F	Rheumatoid arthritis	Weighted median	12	-3.72e-05	0.000404501	0.926658	-0.000830057	0.000755588	0.999963	0.99917	1.00076					0.970524
972	Cathepsin F	Rheumatoid arthritis	Simple mode	12	0.000146289	0.000619274	0.817597	-0.00106749	0.00136007	1.00015	0.998933	1.00136					1
973	Cathepsin F	Rheumatoid arthritis	Weighted mode	12	2.66e-05	0.000519352	0.960066	-0.000991327	0.00104453	1.00003	0.999009	1.00105					1
974	Cathepsin F	Rheumatoid arthritis	Maximum likelihood	12	-1.61e-05	0.000306616	0.958028	-0.000617105	0.000584831	0.999984	0.999383	1.00059					0.980051
975	Cathepsin G	Rheumatoid arthritis	Inverse variance weighted	15	8.9e-05	0.000442703	0.840689	-0.000778709	0.000956686	1.00009	0.999222	1.00096	22.8206	0.0749483	0.541548	0.078	0.971706
976	Cathepsin G	Rheumatoid arthritis	MR Egger	15	-0.000442561	0.00096109	0.652781	-0.0023263	0.00144118	0.999558	0.997676	1.00144		0.0630659			0.962852
977	Cathepsin G	Rheumatoid arthritis	Weighted median	15	-0.000197609	0.000504541	0.695309	-0.00118651	0.000791292	0.999802	0.998814	1.00079					1
978	Cathepsin G	Rheumatoid arthritis	Simple mode	15	-0.000411685	0.00085461	0.637447	-0.00208672	0.00126335	0.999588	0.997915	1.00126					1
979	Cathepsin G	Rheumatoid arthritis	Weighted mode	15	-0.000369065	0.000799779	0.651558	-0.00193663	0.0011985	0.999631	0.998065	1.0012					1
980	Cathepsin G	Rheumatoid arthritis	Maximum likelihood	15	9.01e-05	0.000362481	0.803713	-0.00062037	0.000800555	1.00009	0.99938	1.0008					0.96014
981	Cathepsin H	Rheumatoid arthritis	Inverse variance weighted	11	-0.000156579	0.000214701	0.465827	-0.000577393	0.000264236	0.999843	0.999423	1.00026	126.485	0.24731	0.819846	0.4	1
982	Cathepsin H	Rheumatoid arthritis	MR Egger	11	-0.000207397	0.000312845	0.523983	-0.000820573	0.000405778	0.999793	0.99918	1.00041		0.185718			0.918266
983	Cathepsin H	Rheumatoid arthritis	Weighted median	11	-0.000224683	0.000208932	0.282202	-0.000634191	0.000184825	0.999775	0.999366	1.00018					1
984	Cathepsin H	Rheumatoid arthritis	Simple mode	11	6.84e-05	0.000560591	0.905262	-0.00103033	0.00116719	1.00007	0.99897	1.00117					1
985	Cathepsin H	Rheumatoid arthritis	Weighted mode	11	-0.000249057	0.000238858	0.32164	-0.00071722	0.000219105	0.999751	0.999283	1.00022					1
986	Cathepsin H	Rheumatoid arthritis	Maximum likelihood	11	-0.000160358	0.000192615	0.405107	-0.000537883	0.000217166	0.99984	0.999462	1.00022					0.858442
987	Cathepsin B	Rheumatoid arthritis	Inverse variance weighted	18	-9.14e-05	0.000257378	0.722359	-0.00059591	0.000413013	0.999909	0.999404	1.00041	34.9465	0.964719	0.861878	0.951	0.981526
988	Cathepsin B	Rheumatoid arthritis	MR Egger	18	7.14e-06	0.000614128	0.99087	-0.00119655	0.00121083	1.00001	0.998804	1.00121		0.947283			1
989	Cathepsin B	Rheumatoid arthritis	Weighted median	18	0.000164558	0.000384474	0.668644	-0.00058901	0.000918126	1.00016	0.999411	1.00092					1
990	Cathepsin B	Rheumatoid arthritis	Simple mode	18	1.27e-05	0.000622385	0.983939	-0.00120716	0.00123259	1.00001	0.998794	1.00123					1
991	Cathepsin B	Rheumatoid arthritis	Weighted mode	18	0.00013252	0.000408663	0.749684	-0.000668459	0.000933499	1.00013	0.999332	1.00093					1
992	Cathepsin B	Rheumatoid arthritis	Maximum likelihood	18	-9.23e-05	0.000259112	0.72166	-0.000600165	0.000415553	0.999908	0.9994	1.00042					0.965831
993	Cathepsin E	Rheumatoid arthritis	Inverse variance weighted	9	7.41e-05	0.000549378	0.892706	-0.00100268	0.00115088	1.00007	0.998998	1.00115	22.0766	0.147712	0.280063	0.177	0.974857
994	Cathepsin E	Rheumatoid arthritis	MR Egger	9	-0.00163071	0.00155223	0.328372	-0.00467308	0.00141167	0.998371	0.995338	1.00141		0.18289			0.968698
995	Cathepsin E	Rheumatoid arthritis	Weighted median	9	-0.000470724	0.000697845	0.499969	-0.0018385	0.000897053	0.999529	0.998163	1.0009					0.99432
996	Cathepsin E	Rheumatoid arthritis	Simple mode	9	-0.000894646	0.00118168	0.470699	-0.00321074	0.00142144	0.999106	0.996794	1.00142					1
997	Cathepsin E	Rheumatoid arthritis	Weighted mode	9	-0.000894646	0.00113207	0.452155	-0.00311351	0.00132421	0.999106	0.996891	1.00133					1
998	Cathepsin E	Rheumatoid arthritis	Maximum likelihood	9	7.78e-05	0.000461374	0.866099	-0.000826498	0.000982087	1.00008	0.999174	1.00098					0.945802
999	Cathepsin O	Rheumatoid arthritis	Inverse variance weighted	11	0.000425736	0.000459241	0.353904	-0.000474377	0.00132585	1.00043	0.999526	1.00133	22.8192	0.212081	0.0615963	0.25	0.984297
1000	Cathepsin O	Rheumatoid arthritis	MR Egger	11	-0.00138556	0.000938035	0.173766	-0.00322411	0.000452984	0.998615	0.996781	1.00045		0.469554			1
1001	Cathepsin O	Rheumatoid arthritis	Weighted median	11	0.000781656	0.000549742	0.155067	-0.000295838	0.00185915	1.00078	0.999704	1.00186					1
1002	Cathepsin O	Rheumatoid arthritis	Simple mode	11	0.000715626	0.000956098	0.471404	-0.00115832	0.00258958	1.00072	0.998842	1.00259					1
1003	Cathepsin O	Rheumatoid arthritis	Weighted mode	11	0.000733169	0.000899008	0.433763	-0.00102889	0.00249522	1.00073	0.998972	1.0025					1
1004	Cathepsin O	Rheumatoid arthritis	Maximum likelihood	11	0.000447939	0.000411519	0.276374	-0.000358638	0.00125452	1.00045	0.999641	1.00126					0.863062
1005	Cathepsin Z	Rheumatoid arthritis	Inverse variance weighted	12	-0.000141084	0.000256209	0.581868	-0.000643254	0.000361086	0.999859	0.999357	1.00036	55.9291	0.852911	0.189668	0.858	0.977098
1006	Cathepsin Z	Rheumatoid arthritis	MR Egger	12	0.000288124	0.00039833	0.486053	-0.000492604	0.00106885	1.00029	0.999508	1.00107		0.931992			0.935124
1007	Cathepsin Z	Rheumatoid arthritis	Weighted median	12	-1.38e-05	0.000320154	0.965595	-0.000641311	0.000613692	0.999986	0.999359	1.00061					0.976631
1008	Cathepsin Z	Rheumatoid arthritis	Simple mode	12	-7.88e-06	0.000516164	0.98809	-0.00101956	0.0010038	0.999992	0.998981	1.001					0.999383
1009	Cathepsin Z	Rheumatoid arthritis	Weighted mode	12	4.59e-05	0.000317454	0.887549	-0.000576267	0.000668151	1.00005	0.999424	1.00067					1
1010	Cathepsin Z	Rheumatoid arthritis	Maximum likelihood	12	-0.000140689	0.000257646	0.58503	-0.000645675	0.000364298	0.999859	0.999355	1.00036					0.905524
1011	Cathepsin L2	Rheumatoid arthritis	Inverse variance weighted	11	-0.000463707	0.000387289	0.231184	-0.00122279	0.000295379	0.999536	0.998778	1.0003	24.6843	0.546563	0.220934	0.576	1
1012	Cathepsin L2	Rheumatoid arthritis	MR Egger	11	0.00059635	0.000894174	0.521547	-0.00115623	0.00234893	1.0006	0.998844	1.00235		0.624807			0.923139
1013	Cathepsin L2	Rheumatoid arthritis	Weighted median	11	-0.000382389	0.000522921	0.464623	-0.00140731	0.000642536	0.999618	0.998594	1.00064					0.945267
1014	Cathepsin L2	Rheumatoid arthritis	Simple mode	11	0.000239671	0.00095749	0.807414	-0.00163701	0.00211635	1.00024	0.998364	1.00212					1
1015	Cathepsin L2	Rheumatoid arthritis	Weighted mode	11	0.000193366	0.000981462	0.84776	-0.0017303	0.00211703	1.00019	0.998271	1.00212					1
1016	Cathepsin L2	Rheumatoid arthritis	Maximum likelihood	11	-0.000478752	0.000394817	0.225285	-0.00125259	0.000295088	0.999521	0.998748	1.0003					0.891128
1017	Cathepsin S	Ankylosing spondylitis	Inverse variance weighted	24	-0.000221808	0.000176015	0.20761	-0.000566798	0.000123182	0.999778	0.999433	1.00012	39.7152	0.942922	0.367552	0.951	1
1018	Cathepsin S	Ankylosing spondylitis	MR Egger	24	-3.3e-06	0.000295618	0.991184	-0.000582715	0.000576108	0.999997	0.999417	1.00058		0.945016			1
1019	Cathepsin S	Ankylosing spondylitis	Weighted median	24	-0.000123019	0.00025648	0.631481	-0.000625721	0.000379682	0.999877	0.999374	1.00038					1
1020	Cathepsin S	Ankylosing spondylitis	Simple mode	24	0.00021207	0.000469676	0.655841	-0.000708495	0.00113263	1.00021	0.999292	1.00113					1
1021	Cathepsin S	Ankylosing spondylitis	Weighted mode	24	-6.95e-05	0.000267042	0.797053	-0.000592878	0.000453928	0.999931	0.999407	1.00045					1
1022	Cathepsin S	Ankylosing spondylitis	Maximum likelihood	24	-0.000222307	0.000177517	0.210455	-0.000570239	0.000125626	0.999778	0.99943	1.00013					0.913682
1023	Cathepsin F	Ankylosing spondylitis	Inverse variance weighted	11	4.45e-05	0.000334628	0.89411	-0.000611329	0.000700411	1.00004	0.999389	1.0007	37.9289	0.0856753	0.871443	0.1	0.970436
1024	Cathepsin F	Ankylosing spondylitis	MR Egger	11	0.000182668	0.000901249	0.84389	-0.00158378	0.00194912	1.00018	0.998417	1.00195		0.0576998			0.957491
1025	Cathepsin F	Ankylosing spondylitis	Weighted median	11	-0.00020317	0.000358493	0.570896	-0.000905817	0.000499477	0.999797	0.999095	1.0005					0.990673
1026	Cathepsin F	Ankylosing spondylitis	Simple mode	11	-0.000658367	0.000576868	0.280347	-0.00178903	0.000472295	0.999342	0.998213	1.00047					1
1027	Cathepsin F	Ankylosing spondylitis	Weighted mode	11	-0.000224245	0.000432294	0.615231	-0.00107154	0.000623051	0.999776	0.998929	1.00062					1
1028	Cathepsin F	Ankylosing spondylitis	Maximum likelihood	11	4.66e-05	0.000265607	0.860628	-0.000473955	0.000567223	1.00005	0.999526	1.00057					0.951502
1029	Cathepsin G	Ankylosing spondylitis	Inverse variance weighted	12	0.000662472	0.000325692	0.0419474	2.41e-05	0.00130083	1.00066	1.00002	1.0013	22.9685	0.889372	0.46129	0.88	0.678785
1030	Cathepsin G	Ankylosing spondylitis	MR Egger	12	0.00114757	0.000712018	0.138101	-0.000247988	0.00254312	1.00115	0.999752	1.00255		0.879867			1
1031	Cathepsin G	Ankylosing spondylitis	Weighted median	12	0.000730849	0.000416614	0.0793859	-8.57e-05	0.00154741	1.00073	0.999914	1.00155					1
1032	Cathepsin G	Ankylosing spondylitis	Simple mode	12	0.000925348	0.000742675	0.238661	-0.000530295	0.00238099	1.00093	0.99947	1.00238					1
1033	Cathepsin G	Ankylosing spondylitis	Weighted mode	12	0.000854813	0.000771923	0.291757	-0.000658157	0.00236778	1.00086	0.999342	1.00237					1
1034	Cathepsin G	Ankylosing spondylitis	Maximum likelihood	12	0.000676641	0.000332287	0.0417184	2.54e-05	0.00132792	1.00068	1.00003	1.00133					0.618823
1035	Cathepsin H	Ankylosing spondylitis	Inverse variance weighted	11	3.52e-05	0.000159596	0.825303	-0.000277581	0.000348037	1.00004	0.999722	1.00035	126.485	0.439517	0.323623	0.45	0.966473
1036	Cathepsin H	Ankylosing spondylitis	MR Egger	11	0.000195302	0.00022123	0.400309	-0.000238309	0.000628912	1.0002	0.999762	1.00063		0.444621			0.970612
1037	Cathepsin H	Ankylosing spondylitis	Weighted median	11	0.000150365	0.000181202	0.406638	-0.00020479	0.00050552	1.00015	0.999795	1.00051					0.922756
1038	Cathepsin H	Ankylosing spondylitis	Simple mode	11	-1.26e-05	0.000484493	0.979822	-0.000962171	0.000937043	0.999987	0.999038	1.00094					1
1039	Cathepsin H	Ankylosing spondylitis	Weighted mode	11	0.000149534	0.000184492	0.436508	-0.000212071	0.000511139	1.00015	0.999788	1.00051					1
1040	Cathepsin H	Ankylosing spondylitis	Maximum likelihood	11	3.55e-05	0.00016026	0.824479	-0.000278566	0.000349653	1.00004	0.999721	1.00035					0.952969
1041	Cathepsin O	Ankylosing spondylitis	Inverse variance weighted	9	-0.000229127	0.000366254	0.531579	-0.000946984	0.00048873	0.999771	0.999053	1.00049	22.6286	0.873588	0.304093	0.869	0.946211
1042	Cathepsin O	Ankylosing spondylitis	MR Egger	9	0.000689805	0.000905985	0.471293	-0.00108592	0.00246553	1.00069	0.998915	1.00247		0.920699			0.947942
1043	Cathepsin O	Ankylosing spondylitis	Weighted median	9	-0.000471364	0.000471065	0.317003	-0.00139465	0.000451923	0.999529	0.998606	1.00045					0.967406
1044	Cathepsin O	Ankylosing spondylitis	Simple mode	9	-0.0005803	0.000675184	0.415092	-0.00190366	0.000743061	0.99942	0.998098	1.00074					1
1045	Cathepsin O	Ankylosing spondylitis	Weighted mode	9	-0.000586832	0.000636823	0.383737	-0.00183501	0.000661341	0.999413	0.998167	1.00066					1
1046	Cathepsin O	Ankylosing spondylitis	Maximum likelihood	9	-0.000235043	0.000370684	0.526029	-0.000961584	0.000491498	0.999765	0.999039	1.00049					0.883332
1047	Cathepsin E	Ankylosing spondylitis	Inverse variance weighted	11	0.000244343	0.000460811	0.595943	-0.000658848	0.00114753	1.00024	0.999341	1.00115	21.9151	0.0520836	0.616312	0.065	0.964344
1048	Cathepsin E	Ankylosing spondylitis	MR Egger	11	-0.000255169	0.00107497	0.817683	-0.00236211	0.00185178	0.999745	0.997641	1.00185		0.0394987			0.998137
1049	Cathepsin E	Ankylosing spondylitis	Weighted median	11	6.39e-05	0.000503788	0.899078	-0.00092353	0.00105132	1.00006	0.999077	1.00105					0.970346
1050	Cathepsin E	Ankylosing spondylitis	Simple mode	11	-3.01e-05	0.000802744	0.970815	-0.00160349	0.00154327	0.99997	0.998398	1.00154					1
1051	Cathepsin E	Ankylosing spondylitis	Weighted mode	11	-3.01e-05	0.000785917	0.97019	-0.00157051	0.00151029	0.99997	0.998431	1.00151					1
1052	Cathepsin E	Ankylosing spondylitis	Maximum likelihood	11	0.000263067	0.000355446	0.459236	-0.000433606	0.00095974	1.00026	0.999566	1.00096					0.898287
1053	Cathepsin B	Ankylosing spondylitis	Inverse variance weighted	16	7.86e-05	0.000223956	0.725631	-0.000360358	0.000517549	1.00008	0.99964	1.00052	36.2834	0.948117	0.172381	0.95	0.978503
1054	Cathepsin B	Ankylosing spondylitis	MR Egger	16	-0.000592949	0.000517892	0.271436	-0.00160802	0.000422119	0.999407	0.998393	1.00042		0.98197			1
1055	Cathepsin B	Ankylosing spondylitis	Weighted median	16	-7.06e-05	0.00031745	0.823938	-0.00069283	0.000551576	0.999929	0.999307	1.00055					0.998884
1056	Cathepsin B	Ankylosing spondylitis	Simple mode	16	-3.74e-05	0.00049269	0.940555	-0.00100303	0.00092831	0.999963	0.998997	1.00093					1
1057	Cathepsin B	Ankylosing spondylitis	Weighted mode	16	-0.000107985	0.000328911	0.747215	-0.000752652	0.000536681	0.999892	0.999248	1.00054					1
1058	Cathepsin B	Ankylosing spondylitis	Maximum likelihood	16	7.96e-05	0.000225378	0.723824	-0.000362104	0.00052138	1.00008	0.999638	1.00052					0.961498
1059	Cathepsin Z	Ankylosing spondylitis	Inverse variance weighted	12	-0.000178641	0.000213781	0.403365	-0.000597651	0.000240369	0.999821	0.999403	1.00024	55.9291	0.650292	0.0868925	0.577	0.997208
1060	Cathepsin Z	Ankylosing spondylitis	MR Egger	12	-0.000664848	0.000333641	0.0742855	-0.00131879	-1.09e-05	0.999335	0.998682	0.999989		0.885138			1
1061	Cathepsin Z	Ankylosing spondylitis	Weighted median	12	-9.99e-05	0.000311835	0.748703	-0.000711094	0.000511301	0.9999	0.999289	1.00051					1
1062	Cathepsin Z	Ankylosing spondylitis	Simple mode	12	-6.72e-05	0.000537191	0.902664	-0.00112012	0.000985666	0.999933	0.998881	1.00099					1
1063	Cathepsin Z	Ankylosing spondylitis	Weighted mode	12	-0.000257336	0.000349447	0.476894	-0.000942252	0.00042758	0.999743	0.999058	1.00043					1
1064	Cathepsin Z	Ankylosing spondylitis	Maximum likelihood	12	-0.000180413	0.000215431	0.402339	-0.000602658	0.000241832	0.99982	0.999398	1.00024					0.87337
1065	Cathepsin L2	Ankylosing spondylitis	Inverse variance weighted	11	-0.000377468	0.000322574	0.241931	-0.00100971	0.000254778	0.999623	0.998991	1.00025	24.6843	0.669371	0.538554	0.716	0.978722
1066	Cathepsin L2	Ankylosing spondylitis	MR Egger	11	-0.000806733	0.000744922	0.306978	-0.00226678	0.000653313	0.999194	0.997736	1.00065		0.618846			0.987912
1067	Cathepsin L2	Ankylosing spondylitis	Weighted median	11	-0.000402677	0.000437688	0.357568	-0.00126055	0.000455192	0.999597	0.99874	1.00046					0.958933
1068	Cathepsin L2	Ankylosing spondylitis	Simple mode	11	-0.000681528	0.00064848	0.31801	-0.00195255	0.000589493	0.999319	0.998049	1.00059					1
1069	Cathepsin L2	Ankylosing spondylitis	Weighted mode	11	-0.000601015	0.000629143	0.361953	-0.00183414	0.000632106	0.999399	0.998168	1.00063					1
1070	Cathepsin L2	Ankylosing spondylitis	Maximum likelihood	11	-0.000382638	0.0003281	0.243524	-0.00102571	0.000260437	0.999617	0.998975	1.00026					0.922281
1071	Cathepsin S	Musculoskeletal system and connective tissue diseases	Inverse variance weighted	24	0.00644475	0.0101672	0.526161	-0.0134829	0.0263724	1.00647	0.986608	1.02672	39.7152	0.60134	0.543658	0.566	0.955681
1072	Cathepsin S	Musculoskeletal system and connective tissue diseases	MR Egger	24	0.015257	0.0175343	0.393628	-0.0191102	0.0496242	1.01537	0.981071	1.05088		0.565048			0.995316
1073	Cathepsin S	Musculoskeletal system and connective tissue diseases	Weighted median	24	0.0168298	0.0146559	0.250831	-0.0118957	0.0455553	1.01697	0.988175	1.04661					1
1074	Cathepsin S	Musculoskeletal system and connective tissue diseases	Simple mode	24	-0.0141018	0.024883	0.57639	-0.0628726	0.0346689	0.985997	0.939063	1.03528					1
1075	Cathepsin S	Musculoskeletal system and connective tissue diseases	Weighted mode	24	0.0196884	0.0162314	0.237449	-0.0121252	0.051502	1.01988	0.987948	1.05285					1
1076	Cathepsin S	Musculoskeletal system and connective tissue diseases	Maximum likelihood	24	0.0065791	0.0102761	0.522021	-0.0135621	0.0267203	1.0066	0.986529	1.02708					0.88495
1077	Cathepsin F	Musculoskeletal system and connective tissue diseases	Inverse variance weighted	12	0.00115651	0.0128181	0.928109	-0.023967	0.02628	1.00116	0.976318	1.02663	36.6058	0.664692	0.402509	0.704	0.971784
1078	Cathepsin F	Musculoskeletal system and connective tissue diseases	MR Egger	12	-0.0225554	0.03	0.469469	-0.0813553	0.0362445	0.977697	0.921866	1.03691		0.65118			0.955126
1079	Cathepsin F	Musculoskeletal system and connective tissue diseases	Weighted median	12	-0.000333117	0.0169372	0.984308	-0.03353	0.0328638	0.999667	0.967026	1.03341					0.984308
1080	Cathepsin F	Musculoskeletal system and connective tissue diseases	Simple mode	12	0.00443366	0.0256673	0.865996	-0.0458742	0.0547416	1.00444	0.955162	1.05627					1
1081	Cathepsin F	Musculoskeletal system and connective tissue diseases	Weighted mode	12	-0.000123154	0.0228078	0.995788	-0.0448263	0.04458	0.999877	0.956164	1.04559					0.995788
1082	Cathepsin F	Musculoskeletal system and connective tissue diseases	Maximum likelihood	12	0.0011808	0.0129418	0.927303	-0.0241851	0.0265467	1.00118	0.976105	1.0269					0.970941
1083	Cathepsin G	Musculoskeletal system and connective tissue diseases	Inverse variance weighted	13	-0.0128141	0.0200959	0.523702	-0.0522021	0.0265739	0.987268	0.949137	1.02693	22.9823	0.0263691	0.0262792	0.042	0.961021
1084	Cathepsin G	Musculoskeletal system and connective tissue diseases	MR Egger	13	-0.0835318	0.0321828	0.024891	-0.14661	-0.0204535	0.919862	0.863631	0.979754		0.206856			1
1085	Cathepsin G	Musculoskeletal system and connective tissue diseases	Weighted median	13	-0.0289177	0.020874	0.165946	-0.0698308	0.0119953	0.971496	0.932552	1.01207					1
1086	Cathepsin G	Musculoskeletal system and connective tissue diseases	Simple mode	13	0.00382714	0.0386653	0.922787	-0.0719569	0.0796112	1.00383	0.930571	1.08287					1
1087	Cathepsin G	Musculoskeletal system and connective tissue diseases	Weighted mode	13	-0.0369089	0.0235426	0.142919	-0.0830523	0.00923461	0.963764	0.920303	1.00928					1
1088	Cathepsin G	Musculoskeletal system and connective tissue diseases	Maximum likelihood	13	-0.0131792	0.0148886	0.376058	-0.0423608	0.0160025	0.986907	0.958524	1.01613					0.84732
1089	Cathepsin H	Musculoskeletal system and connective tissue diseases	Inverse variance weighted	11	-0.0084659	0.0107461	0.430809	-0.0295283	0.0125965	0.99157	0.970903	1.01268	126.485	0.060859	0.869108	0.27	1
1090	Cathepsin H	Musculoskeletal system and connective tissue diseases	MR Egger	11	-0.0066568	0.015548	0.678609	-0.0371309	0.0238173	0.993365	0.96355	1.0241		0.0399759			0.953285
1091	Cathepsin H	Musculoskeletal system and connective tissue diseases	Weighted median	11	-0.00926975	0.00880518	0.29245	-0.0265279	0.00798839	0.990773	0.973821	1.00802					1
1092	Cathepsin H	Musculoskeletal system and connective tissue diseases	Simple mode	11	-0.00157471	0.0242552	0.949515	-0.049115	0.0459656	0.998427	0.952072	1.04704					1
1093	Cathepsin H	Musculoskeletal system and connective tissue diseases	Weighted mode	11	-0.010077	0.0087873	0.278174	-0.0273001	0.00714608	0.989974	0.973069	1.00717					1
1094	Cathepsin H	Musculoskeletal system and connective tissue diseases	Maximum likelihood	11	-0.00854388	0.00814479	0.294178	-0.0245077	0.00741991	0.991493	0.97579	1.00745					0.872729
1095	Cathepsin B	Musculoskeletal system and connective tissue diseases	Inverse variance weighted	17	0.0140186	0.0133498	0.293676	-0.0121471	0.0401842	1.01412	0.987926	1.041	35.5021	0.295347	0.237665	0.268	0.968044
1096	Cathepsin B	Musculoskeletal system and connective tissue diseases	MR Egger	17	0.0479903	0.0305875	0.13751	-0.0119612	0.107942	1.04916	0.98811	1.11398		0.330547			1
1097	Cathepsin B	Musculoskeletal system and connective tissue diseases	Weighted median	17	0.0344802	0.0174971	0.048767	0.000185866	0.0687745	1.03508	1.00019	1.07119					0.863177
1098	Cathepsin B	Musculoskeletal system and connective tissue diseases	Simple mode	17	0.0349139	0.0323967	0.297148	-0.0285836	0.0984114	1.03553	0.971821	1.10342					1
1099	Cathepsin B	Musculoskeletal system and connective tissue diseases	Weighted mode	17	0.0389996	0.0228526	0.107231	-0.00579136	0.0837907	1.03977	0.994225	1.0874					1
1100	Cathepsin B	Musculoskeletal system and connective tissue diseases	Maximum likelihood	17	0.014277	0.0126444	0.25885	-0.010506	0.0390599	1.01438	0.989549	1.03983					0.903436
1101	Cathepsin O	Musculoskeletal system and connective tissue diseases	Inverse variance weighted	12	-0.0285887	0.0217348	0.188394	-0.0711889	0.0140115	0.971816	0.931286	1.01411	23.2138	0.0553324	0.0667359	0.056	1
1102	Cathepsin O	Musculoskeletal system and connective tissue diseases	MR Egger	12	-0.11018	0.0440305	0.0313199	-0.19648	-0.0238804	0.895673	0.821618	0.976402		0.192673			1
1103	Cathepsin O	Musculoskeletal system and connective tissue diseases	Weighted median	12	-0.0227695	0.0249649	0.361736	-0.0717007	0.0261617	0.977488	0.930809	1.02651					0.955632
1104	Cathepsin O	Musculoskeletal system and connective tissue diseases	Simple mode	12	-0.0272389	0.0411125	0.521262	-0.107819	0.0533417	0.973129	0.89779	1.05479					1
1105	Cathepsin O	Musculoskeletal system and connective tissue diseases	Weighted mode	12	-0.0225501	0.0390452	0.575206	-0.0990788	0.0539785	0.977702	0.905671	1.05546					1
1106	Cathepsin O	Musculoskeletal system and connective tissue diseases	Maximum likelihood	12	-0.0298411	0.0171528	0.0819077	-0.0634607	0.00377837	0.9706	0.938511	1.00379					0.809976
1107	Cathepsin E	Musculoskeletal system and connective tissue diseases	Inverse variance weighted	10	-0.0165094	0.0162958	0.311008	-0.0484493	0.0154304	0.983626	0.952706	1.01555	21.973	0.154667	0.271679	0.183	0.988561
1108	Cathepsin E	Musculoskeletal system and connective tissue diseases	MR Egger	10	-0.0418208	0.0267224	0.156212	-0.0941966	0.0105551	0.959042	0.910104	1.01061		0.189342			1
1109	Cathepsin E	Musculoskeletal system and connective tissue diseases	Weighted median	10	-0.0250951	0.0188047	0.182036	-0.0619524	0.0117621	0.975217	0.939928	1.01183					1
1110	Cathepsin E	Musculoskeletal system and connective tissue diseases	Simple mode	10	-0.00965875	0.0338358	0.781753	-0.0759769	0.0566594	0.990388	0.926838	1.0583					1
1111	Cathepsin E	Musculoskeletal system and connective tissue diseases	Weighted mode	10	-0.0305321	0.0239572	0.234427	-0.0774883	0.016424	0.969929	0.925438	1.01656					1
1112	Cathepsin E	Musculoskeletal system and connective tissue diseases	Maximum likelihood	10	-0.0172481	0.0136752	0.20721	-0.0440514	0.0095552	0.9829	0.956905	1.0096					0.922085
1113	Cathepsin Z	Musculoskeletal system and connective tissue diseases	Inverse variance weighted	13	0.0105222	0.0153065	0.491812	-0.0194786	0.040523	1.01058	0.98071	1.04136	53.4584	0.0502124	0.034897	0.067	0.972694
1114	Cathepsin Z	Musculoskeletal system and connective tissue diseases	MR Egger	13	-0.0282282	0.0206643	0.199204	-0.0687303	0.0122738	0.972166	0.933578	1.01235		0.24604			1
1115	Cathepsin Z	Musculoskeletal system and connective tissue diseases	Weighted median	13	-0.010421	0.0159419	0.513314	-0.0416671	0.0208251	0.989633	0.959189	1.02104					0.976952
1116	Cathepsin Z	Musculoskeletal system and connective tissue diseases	Simple mode	13	0.00147348	0.0298327	0.96142	-0.0569987	0.0599456	1.00147	0.944595	1.06178					1
1117	Cathepsin Z	Musculoskeletal system and connective tissue diseases	Weighted mode	13	-0.00901749	0.0151414	0.562538	-0.0386946	0.0206596	0.991023	0.962044	1.02087					1
1118	Cathepsin Z	Musculoskeletal system and connective tissue diseases	Maximum likelihood	13	0.0110727	0.0117559	0.34625	-0.0119689	0.0341144	1.01113	0.988102	1.0347					0.893226
1119	Cathepsin L2	Musculoskeletal system and connective tissue diseases	Inverse variance weighted	11	0.00518176	0.0228289	0.820438	-0.039563	0.0499265	1.0052	0.961209	1.05119	24.6843	0.124787	0.600694	0.125	0.973586
1120	Cathepsin L2	Musculoskeletal system and connective tissue diseases	MR Egger	11	0.0376987	0.0644543	0.572991	-0.0886317	0.164029	1.03842	0.915183	1.17825		0.0988301			0.90553
1121	Cathepsin L2	Musculoskeletal system and connective tissue diseases	Weighted median	11	0.0188516	0.0281819	0.503541	-0.0363848	0.0740881	1.01903	0.964269	1.0769					0.979416
1122	Cathepsin L2	Musculoskeletal system and connective tissue diseases	Simple mode	11	0.0318104	0.049576	0.53553	-0.0653584	0.128979	1.03232	0.936732	1.13767					1
1123	Cathepsin L2	Musculoskeletal system and connective tissue diseases	Weighted mode	11	0.0290673	0.0429921	0.514304	-0.0551973	0.113332	1.02949	0.946298	1.12					1
1124	Cathepsin L2	Musculoskeletal system and connective tissue diseases	Maximum likelihood	11	0.00552211	0.0191929	0.773564	-0.032096	0.0431402	1.00554	0.968414	1.04408					0.969679
1125	Cathepsin S	Skeletal/Cartilage Diseases	Inverse variance weighted	24	0.0206057	0.117676	0.860997	-0.210039	0.251251	1.02082	0.810552	1.28563	39.7152	0.105392	0.644175	0.113	0.982419
1126	Cathepsin S	Skeletal/Cartilage Diseases	MR Egger	24	-0.0581978	0.20652	0.780729	-0.462977	0.346582	0.943463	0.629407	1.41423		0.0874668			0.973162
1127	Cathepsin S	Skeletal/Cartilage Diseases	Weighted median	24	-0.0712443	0.145902	0.625335	-0.357211	0.214723	0.931234	0.699625	1.23952					1
1128	Cathepsin S	Skeletal/Cartilage Diseases	Simple mode	24	0.0167106	0.287999	0.954231	-0.547767	0.581188	1.01685	0.57824	1.78816					1
1129	Cathepsin S	Skeletal/Cartilage Diseases	Weighted mode	24	-0.0792004	0.148028	0.597761	-0.369336	0.210935	0.923855	0.691193	1.23483					1
1130	Cathepsin S	Skeletal/Cartilage Diseases	Maximum likelihood	24	0.0212858	0.102038	0.834756	-0.17871	0.221281	1.02151	0.836349	1.24767					0.952478
1131	Cathepsin F	Skeletal/Cartilage Diseases	Inverse variance weighted	12	0.232634	0.151522	0.124705	-0.0643483	0.529617	1.26192	0.937678	1.69828	36.6058	0.144506	0.757173	0.152	0.965111
1132	Cathepsin F	Skeletal/Cartilage Diseases	MR Egger	12	0.338887	0.369844	0.381076	-0.386006	1.06378	1.40339	0.679766	2.89731		0.106989			0.99192
1133	Cathepsin F	Skeletal/Cartilage Diseases	Weighted median	12	0.182586	0.181526	0.314493	-0.173205	0.538377	1.20032	0.840965	1.71322					1
1134	Cathepsin F	Skeletal/Cartilage Diseases	Simple mode	12	0.162553	0.34368	0.645475	-0.511059	0.836166	1.17651	0.59986	2.3075					1
1135	Cathepsin F	Skeletal/Cartilage Diseases	Weighted mode	12	0.251964	0.266071	0.363987	-0.269534	0.773463	1.28655	0.763735	2.16726					1
1136	Cathepsin F	Skeletal/Cartilage Diseases	Maximum likelihood	12	0.240899	0.129896	0.0636599	-0.0136969	0.495496	1.27239	0.986396	1.64131					0.708216
1137	Cathepsin G	Skeletal/Cartilage Diseases	Inverse variance weighted	13	-0.0827077	0.14501	0.568435	-0.366928	0.201512	0.92062	0.69286	1.22325	22.9823	0.412554	0.622218	0.405	0.982344
1138	Cathepsin G	Skeletal/Cartilage Diseases	MR Egger	13	0.0433159	0.290208	0.884051	-0.525492	0.612124	1.04427	0.591264	1.84434		0.353462			0.984133
1139	Cathepsin G	Skeletal/Cartilage Diseases	Weighted median	13	-0.314724	0.21578	0.14469	-0.737652	0.108204	0.72999	0.478235	1.11427					1
1140	Cathepsin G	Skeletal/Cartilage Diseases	Simple mode	13	-0.204906	0.33368	0.550628	-0.85892	0.449107	0.814724	0.423619	1.56691					1
1141	Cathepsin G	Skeletal/Cartilage Diseases	Weighted mode	13	-0.273453	0.214604	0.22671	-0.694077	0.147172	0.760748	0.499535	1.15855					1
1142	Cathepsin G	Skeletal/Cartilage Diseases	Maximum likelihood	13	-0.0844545	0.14466	0.559345	-0.367988	0.199079	0.919014	0.692126	1.22028					0.896968
1143	Cathepsin H	Skeletal/Cartilage Diseases	Inverse variance weighted	11	0.00287256	0.0990448	0.976862	-0.191255	0.197	1.00288	0.825922	1.21774	126.485	0.117003	0.832107	0.335	0.993609
1144	Cathepsin H	Skeletal/Cartilage Diseases	MR Egger	11	-0.0185606	0.143133	0.899677	-0.299101	0.26198	0.981611	0.741484	1.2995		0.081677			0.989085
1145	Cathepsin H	Skeletal/Cartilage Diseases	Weighted median	11	-0.00813833	0.0862993	0.924868	-0.177285	0.161008	0.991895	0.837541	1.17469					0.974415
1146	Cathepsin H	Skeletal/Cartilage Diseases	Simple mode	11	-0.0207029	0.284637	0.943452	-0.578592	0.537186	0.97951	0.560687	1.71118					1
1147	Cathepsin H	Skeletal/Cartilage Diseases	Weighted mode	11	-0.00125514	0.0952412	0.989745	-0.187928	0.185418	0.998746	0.828674	1.20372					1
1148	Cathepsin H	Skeletal/Cartilage Diseases	Maximum likelihood	11	0.0029079	0.0802006	0.971077	-0.154285	0.160101	1.00291	0.857027	1.17363					0.987724
1149	Cathepsin B	Skeletal/Cartilage Diseases	Inverse variance weighted	17	0.133001	0.142481	0.350581	-0.146262	0.412263	1.14225	0.863932	1.51023	35.5021	0.152939	0.961747	0.18	1
1150	Cathepsin B	Skeletal/Cartilage Diseases	MR Egger	17	0.148095	0.342713	0.671797	-0.523622	0.819813	1.15962	0.592371	2.27007		0.115842			0.958936
1151	Cathepsin B	Skeletal/Cartilage Diseases	Weighted median	17	0.143396	0.183696	0.435026	-0.216647	0.50344	1.15419	0.805214	1.6544					0.939019
1152	Cathepsin B	Skeletal/Cartilage Diseases	Simple mode	17	0.0196451	0.305433	0.949513	-0.579003	0.618293	1.01984	0.560457	1.85576					1
1153	Cathepsin B	Skeletal/Cartilage Diseases	Weighted mode	17	0.0949492	0.205547	0.650347	-0.307923	0.497821	1.0996	0.734972	1.64513					1
1154	Cathepsin B	Skeletal/Cartilage Diseases	Maximum likelihood	17	0.140028	0.125142	0.263161	-0.10525	0.385307	1.15031	0.900099	1.47006					0.883822
1155	Cathepsin O	Skeletal/Cartilage Diseases	Inverse variance weighted	12	-0.110846	0.161469	0.492408	-0.427324	0.205633	0.895077	0.652252	1.2283	23.2138	0.963288	0.551204	0.961	0.963172
1156	Cathepsin O	Skeletal/Cartilage Diseases	MR Egger	12	-0.317345	0.371736	0.413263	-1.04595	0.411259	0.72808	0.351358	1.50872		0.954607			0.937789
1157	Cathepsin O	Skeletal/Cartilage Diseases	Weighted median	12	-0.153623	0.211588	0.467808	-0.568336	0.261089	0.857595	0.566467	1.29834					0.940932
1158	Cathepsin O	Skeletal/Cartilage Diseases	Simple mode	12	-0.0510681	0.284232	0.860678	-0.608163	0.506027	0.950214	0.54435	1.65869					1
1159	Cathepsin O	Skeletal/Cartilage Diseases	Weighted mode	12	-0.0438822	0.294095	0.884088	-0.620309	0.532544	0.957067	0.537778	1.70326					1
1160	Cathepsin O	Skeletal/Cartilage Diseases	Maximum likelihood	12	-0.111786	0.163028	0.492913	-0.43132	0.207749	0.894236	0.649651	1.2309					0.868697
1161	Cathepsin E	Skeletal/Cartilage Diseases	Inverse variance weighted	10	0.12749	0.132708	0.336713	-0.132618	0.387597	1.13597	0.8758	1.47344	21.973	0.936977	0.964822	0.928	0.998916
1162	Cathepsin E	Skeletal/Cartilage Diseases	MR Egger	10	0.119377	0.222256	0.605799	-0.316244	0.554999	1.12679	0.728881	1.74194		0.893281			0.940583
1163	Cathepsin E	Skeletal/Cartilage Diseases	Weighted median	10	0.150586	0.174858	0.389134	-0.192136	0.493307	1.16251	0.825195	1.63772					0.970095
1164	Cathepsin E	Skeletal/Cartilage Diseases	Simple mode	10	0.179108	0.246843	0.486525	-0.304703	0.662919	1.19615	0.737342	1.94045					1
1165	Cathepsin E	Skeletal/Cartilage Diseases	Weighted mode	10	0.179108	0.203984	0.402748	-0.2207	0.578916	1.19615	0.801957	1.7841					1
1166	Cathepsin E	Skeletal/Cartilage Diseases	Maximum likelihood	10	0.129998	0.133148	0.328894	-0.130971	0.390967	1.13883	0.877243	1.47841					0.914737
1167	Cathepsin Z	Skeletal/Cartilage Diseases	Inverse variance weighted	13	0.182795	0.113733	0.108006	-0.040123	0.405712	1.20057	0.960671	1.50037	53.4584	0.692068	0.498548	0.642	1
1168	Cathepsin Z	Skeletal/Cartilage Diseases	MR Egger	13	0.0842804	0.180968	0.650501	-0.270417	0.438978	1.08793	0.763061	1.55112		0.655364			0.967552
1169	Cathepsin Z	Skeletal/Cartilage Diseases	Weighted median	13	0.17231	0.16376	0.292703	-0.14866	0.493281	1.18805	0.861862	1.63768					1
1170	Cathepsin Z	Skeletal/Cartilage Diseases	Simple mode	13	0.319403	0.285441	0.285048	-0.240062	0.878867	1.37631	0.786579	2.40817					1
1171	Cathepsin Z	Skeletal/Cartilage Diseases	Weighted mode	13	0.104934	0.213268	0.631576	-0.31307	0.522939	1.11064	0.731198	1.68698					1
1172	Cathepsin Z	Skeletal/Cartilage Diseases	Maximum likelihood	13	0.186067	0.11469	0.10473	-0.0387259	0.410859	1.2045	0.962014	1.50811					0.776747
1173	Cathepsin L2	Skeletal/Cartilage Diseases	Inverse variance weighted	11	0.315084	0.182065	0.0835209	-0.0417634	0.671931	1.37037	0.959097	1.95801	24.6843	0.883166	0.408272	0.876	0.991115
1174	Cathepsin L2	Skeletal/Cartilage Diseases	MR Egger	11	0.71485	0.495554	0.183036	-0.256436	1.68614	2.04388	0.773804	5.39858		0.885749			0.98174
1175	Cathepsin L2	Skeletal/Cartilage Diseases	Weighted median	11	0.252702	0.242225	0.29683	-0.222058	0.727463	1.2875	0.800869	2.06982					1
1176	Cathepsin L2	Skeletal/Cartilage Diseases	Simple mode	11	0.467313	0.401188	0.271125	-0.319015	1.25364	1.5957	0.726864	3.50307					1
1177	Cathepsin L2	Skeletal/Cartilage Diseases	Weighted mode	11	0.14828	0.347044	0.67824	-0.531927	0.828487	1.15984	0.587472	2.28985					1
1178	Cathepsin L2	Skeletal/Cartilage Diseases	Maximum likelihood	11	0.324718	0.184971	0.0791733	-0.0378262	0.687262	1.38364	0.96288	1.98826					0.828991
1179	Cathepsin S	Osteoarthritis	Inverse variance weighted	21	-0.0380179	0.0126987	0.00275482	-0.0629073	-0.0131285	0.962696	0.939031	0.986957	42.288	0.187903	0.028351	0.201	0.245179
1180	Cathepsin S	Osteoarthritis	MR Egger	21	-0.0735796	0.0188552	0.000957654	-0.110536	-0.0366234	0.929062	0.895354	0.964039		0.421203			0.169505
1181	Cathepsin S	Osteoarthritis	Weighted median	21	-0.0584363	0.0152352	0.000125252	-0.0882973	-0.0285753	0.943238	0.915489	0.971829					0.0221696
1182	Cathepsin S	Osteoarthritis	Simple mode	21	-0.049641	0.0298576	0.111988	-0.108162	0.00887996	0.951571	0.897482	1.00892					1
1183	Cathepsin S	Osteoarthritis	Weighted mode	21	-0.0578269	0.0150025	0.000988452	-0.0872318	-0.0284221	0.943813	0.916465	0.971978					0.174956
1184	Cathepsin S	Osteoarthritis	Maximum likelihood	21	-0.0390739	0.0115311	0.00070257	-0.0616747	-0.016473	0.96168	0.940189	0.983662					0.125057
1185	Cathepsin F	Osteoarthritis	Inverse variance weighted	13	0.0149552	0.0158	0.343879	-0.0160129	0.0459232	1.01507	0.984115	1.04699	35.6997	0.391393	0.622205	0.38	1
1186	Cathepsin F	Osteoarthritis	MR Egger	13	-0.00362955	0.0401263	0.929553	-0.082277	0.0750179	0.996377	0.921017	1.0779		0.333784			0.997157
1187	Cathepsin F	Osteoarthritis	Weighted median	13	0.0192549	0.0224757	0.391613	-0.0247976	0.0633074	1.01944	0.975507	1.06535					0.962715
1188	Cathepsin F	Osteoarthritis	Simple mode	13	0.0634187	0.0380558	0.121487	-0.0111706	0.138008	1.06547	0.988892	1.14798					1
1189	Cathepsin F	Osteoarthritis	Weighted mode	13	0.0613863	0.0355625	0.10995	-0.00831626	0.131089	1.06331	0.991718	1.14007					1
1190	Cathepsin F	Osteoarthritis	Maximum likelihood	13	0.0151083	0.0155953	0.332659	-0.0154585	0.0456751	1.01522	0.98466	1.04673					0.910973
1191	Cathepsin G	Osteoarthritis	Inverse variance weighted	12	-0.035389	0.0256152	0.167106	-0.0855948	0.0148168	0.96523	0.917966	1.01493	22.5173	0.0938895	0.647153	0.113	1
1192	Cathepsin G	Osteoarthritis	MR Egger	12	-0.0115534	0.0570763	0.843647	-0.123423	0.100316	0.988513	0.88389	1.10552		0.0717419			0.96339
1193	Cathepsin G	Osteoarthritis	Weighted median	12	-0.056242	0.0284446	0.0480142	-0.111993	-0.000490474	0.94531	0.89405	0.99951					0.944278
1194	Cathepsin G	Osteoarthritis	Simple mode	12	-0.0736792	0.0504463	0.172106	-0.172554	0.0251956	0.92897	0.841513	1.02552					1
1195	Cathepsin G	Osteoarthritis	Weighted mode	12	-0.070788	0.048162	0.169633	-0.165186	0.0236096	0.931659	0.847736	1.02389					1
1196	Cathepsin G	Osteoarthritis	Maximum likelihood	12	-0.0366709	0.0211234	0.0825581	-0.0780728	0.00473096	0.963993	0.924897	1.00474					0.773439
1197	Cathepsin H	Osteoarthritis	Inverse variance weighted	8	0.00470108	0.0127521	0.712387	-0.020293	0.0296951	1.00471	0.979912	1.03014	165.683	0.141741	0.722994	0.378	0.982983
1198	Cathepsin H	Osteoarthritis	MR Egger	8	-3.42e-05	0.0186515	0.998596	-0.0365911	0.0365226	0.999966	0.96407	1.0372		0.0986711			0.998596
1199	Cathepsin H	Osteoarthritis	Weighted median	8	0.00487701	0.0108616	0.653421	-0.0164117	0.0261657	1.00489	0.983722	1.02651					1
1200	Cathepsin H	Osteoarthritis	Simple mode	8	-0.00768856	0.0302989	0.806976	-0.0670745	0.0516974	0.992341	0.935126	1.05306					1
1201	Cathepsin H	Osteoarthritis	Weighted mode	8	0.00387452	0.0108134	0.730675	-0.0173197	0.0250688	1.00388	0.982829	1.02539					1
1202	Cathepsin H	Osteoarthritis	Maximum likelihood	8	0.00475788	0.010263	0.642938	-0.0153576	0.0248734	1.00477	0.98476	1.02519					0.938057
1203	Cathepsin B	Osteoarthritis	Inverse variance weighted	19	0.00452194	0.0136274	0.74002	-0.0221878	0.0312317	1.00453	0.978057	1.03172	34.3177	0.373635	0.285098	0.417	0.983011
1204	Cathepsin B	Osteoarthritis	MR Egger	19	-0.0278752	0.0323277	0.400539	-0.0912375	0.035487	0.97251	0.912801	1.03612		0.388304			0.958046
1205	Cathepsin B	Osteoarthritis	Weighted median	19	0.00728694	0.0194012	0.70722	-0.0307394	0.0453133	1.00731	0.969728	1.04636					1
1206	Cathepsin B	Osteoarthritis	Simple mode	19	0.000646657	0.037222	0.98633	-0.0723085	0.0736018	1.00065	0.930244	1.07638					1
1207	Cathepsin B	Osteoarthritis	Weighted mode	19	0.00504054	0.0200888	0.804723	-0.0343334	0.0444145	1.00505	0.966249	1.04542					1
1208	Cathepsin B	Osteoarthritis	Maximum likelihood	19	0.00462333	0.0133746	0.729584	-0.021591	0.0308376	1.00463	0.97864	1.03132					0.954897
1209	Cathepsin O	Osteoarthritis	Inverse variance weighted	12	-0.0226808	0.0198592	0.25342	-0.0616048	0.0162432	0.977574	0.940254	1.01638	23.2138	0.698625	0.714782	0.708	1
1210	Cathepsin O	Osteoarthritis	MR Egger	12	-0.0371265	0.04325	0.410765	-0.121896	0.0476434	0.963554	0.88524	1.0488		0.626715			0.956651
1211	Cathepsin O	Osteoarthritis	Weighted median	12	-0.0217982	0.026005	0.401901	-0.072768	0.0291716	0.978438	0.929817	1.0296					0.936005
1212	Cathepsin O	Osteoarthritis	Simple mode	12	-0.0162911	0.0405028	0.695226	-0.0956767	0.0630944	0.983841	0.908758	1.06513					1
1213	Cathepsin O	Osteoarthritis	Weighted mode	12	-0.0156176	0.0400933	0.70432	-0.0942005	0.0629654	0.984504	0.9101	1.06499					1
1214	Cathepsin O	Osteoarthritis	Maximum likelihood	12	-0.0230264	0.0201969	0.254246	-0.0626123	0.0165595	0.977237	0.939308	1.0167					0.905117
1215	Cathepsin E	Osteoarthritis	Inverse variance weighted	10	0.0609676	0.0225306	0.00681015	0.0168076	0.105128	1.06286	1.01695	1.11085	21.8525	0.414111	0.915436	0.446	0.242441
1216	Cathepsin E	Osteoarthritis	MR Egger	10	0.0659508	0.0513614	0.23506	-0.0347176	0.166619	1.06817	0.965878	1.1813		0.322396			0.990611
1217	Cathepsin E	Osteoarthritis	Weighted median	10	0.043526	0.0303843	0.151996	-0.0160272	0.103079	1.04449	0.984101	1.10858					1
1218	Cathepsin E	Osteoarthritis	Simple mode	10	0.0394383	0.049356	0.444832	-0.0572995	0.136176	1.04023	0.944311	1.14588					1
1219	Cathepsin E	Osteoarthritis	Weighted mode	10	0.037654	0.0482177	0.454901	-0.0568527	0.132161	1.03837	0.944733	1.14129					1
1220	Cathepsin E	Osteoarthritis	Maximum likelihood	10	0.0635832	0.0231306	0.00598006	0.0182471	0.108919	1.06565	1.01841	1.11507					0.21289
1221	Cathepsin Z	Osteoarthritis	Inverse variance weighted	12	-0.00647716	0.0146864	0.659191	-0.0352626	0.0223082	0.993544	0.965352	1.02256	55.9291	0.265309	0.079116	0.265	0.96177
1222	Cathepsin Z	Osteoarthritis	MR Egger	12	-0.0375836	0.0207292	0.0999005	-0.0782129	0.00304572	0.963114	0.924768	1.00305		0.474206			1
1223	Cathepsin Z	Osteoarthritis	Weighted median	12	-0.0285429	0.0181166	0.115139	-0.0640515	0.00696566	0.971861	0.937957	1.00699					1
1224	Cathepsin Z	Osteoarthritis	Simple mode	12	0.0326764	0.0365594	0.39057	-0.0389799	0.104333	1.03322	0.96177	1.10997					1
1225	Cathepsin Z	Osteoarthritis	Weighted mode	12	-0.029809	0.0176978	0.120244	-0.0644966	0.00487855	0.970631	0.937539	1.00489					1
1226	Cathepsin Z	Osteoarthritis	Maximum likelihood	12	-0.00664634	0.0134387	0.620905	-0.0329862	0.0196935	0.993376	0.967552	1.01989					0.913398
1227	Cathepsin L2	Osteoarthritis	Inverse variance weighted	8	-0.0306944	0.0247496	0.214902	-0.0792035	0.0178148	0.969772	0.923852	1.01797	22.7502	0.689415	0.73619	0.697	1
1228	Cathepsin L2	Osteoarthritis	MR Egger	8	-0.0126663	0.0567577	0.830811	-0.123911	0.0985788	0.987414	0.883458	1.1036		0.591555			0.986937
1229	Cathepsin L2	Osteoarthritis	Weighted median	8	-0.0200977	0.031717	0.526306	-0.0822631	0.0420677	0.980103	0.92103	1.04297					0.980591
1230	Cathepsin L2	Osteoarthritis	Simple mode	8	-0.00324121	0.0471044	0.947066	-0.0955659	0.0890835	0.996764	0.908858	1.09317					1
1231	Cathepsin L2	Osteoarthritis	Weighted mode	8	0.00122941	0.0509334	0.981417	-0.0986001	0.101059	1.00123	0.906105	1.10634					1
1232	Cathepsin L2	Osteoarthritis	Maximum likelihood	8	-0.03147	0.0251963	0.211667	-0.0808547	0.0179147	0.96902	0.922328	1.01808					0.897066
1233	Cathepsin S	Benign tumors of bone and articular cartilage	Inverse variance weighted	24	0.0431323	0.0598854	0.471373	-0.0742431	0.160508	1.04408	0.928446	1.17411	39.7152	0.824356	0.750058	0.838	1
1234	Cathepsin S	Benign tumors of bone and articular cartilage	MR Egger	24	0.0702794	0.103289	0.503338	-0.132166	0.272725	1.07281	0.876195	1.31354		0.785977			0.928029
1235	Cathepsin S	Benign tumors of bone and articular cartilage	Weighted median	24	0.0186137	0.0852989	0.82726	-0.148572	0.185799	1.01879	0.861938	1.20418					0.989358
1236	Cathepsin S	Benign tumors of bone and articular cartilage	Simple mode	24	-0.0215973	0.13859	0.877522	-0.293234	0.250039	0.978634	0.745848	1.28408					1
1237	Cathepsin S	Benign tumors of bone and articular cartilage	Weighted mode	24	0.00629406	0.0901284	0.944929	-0.170358	0.182946	1.00631	0.843363	1.20075					1
1238	Cathepsin S	Benign tumors of bone and articular cartilage	Maximum likelihood	24	0.0439345	0.0604955	0.467689	-0.0746367	0.162506	1.04491	0.928081	1.17646					0.904876
1239	Cathepsin F	Benign tumors of bone and articular cartilage	Inverse variance weighted	12	0.0572483	0.075503	0.448316	-0.0907376	0.205234	1.05892	0.913257	1.22781	36.6058	0.954921	0.757912	0.949	0.997503
1240	Cathepsin F	Benign tumors of bone and articular cartilage	MR Egger	12	0.107877	0.176752	0.55526	-0.238558	0.454312	1.11391	0.787763	1.57509		0.930283			0.927179
1241	Cathepsin F	Benign tumors of bone and articular cartilage	Weighted median	12	0.133666	0.10372	0.197498	-0.0696261	0.336958	1.14301	0.932742	1.40068					1
1242	Cathepsin F	Benign tumors of bone and articular cartilage	Simple mode	12	0.135096	0.149333	0.385028	-0.157596	0.427789	1.14465	0.854195	1.53386					1
1243	Cathepsin F	Benign tumors of bone and articular cartilage	Weighted mode	12	0.145449	0.127628	0.278648	-0.104702	0.395599	1.15656	0.900593	1.48527					1
1244	Cathepsin F	Benign tumors of bone and articular cartilage	Maximum likelihood	12	0.0580364	0.0760945	0.44565	-0.0911089	0.207182	1.05975	0.912918	1.23021					0.891299
1245	Cathepsin G	Benign tumors of bone and articular cartilage	Inverse variance weighted	13	-0.071078	0.09031	0.431256	-0.248085	0.10593	0.931389	0.780293	1.11174	22.9823	0.335336	0.747918	0.325	1
1246	Cathepsin G	Benign tumors of bone and articular cartilage	MR Egger	13	-0.122445	0.181945	0.514849	-0.479057	0.234166	0.884754	0.619367	1.26385		0.271354			0.92988
1247	Cathepsin G	Benign tumors of bone and articular cartilage	Weighted median	13	0.0189509	0.1198	0.874309	-0.215856	0.253758	1.01913	0.805851	1.28886					0.998404
1248	Cathepsin G	Benign tumors of bone and articular cartilage	Simple mode	13	-0.124504	0.206594	0.557959	-0.529427	0.28042	0.882935	0.588942	1.32369					1
1249	Cathepsin G	Benign tumors of bone and articular cartilage	Weighted mode	13	0.0231456	0.128009	0.859532	-0.227752	0.274043	1.02342	0.796322	1.31527					1
1250	Cathepsin G	Benign tumors of bone and articular cartilage	Maximum likelihood	13	-0.0755359	0.0890285	0.396189	-0.250032	0.0989598	0.927246	0.778776	1.10402					0.870638
1251	Cathepsin H	Benign tumors of bone and articular cartilage	Inverse variance weighted	11	-0.144584	0.0477004	0.00243679	-0.238077	-0.051091	0.865382	0.788142	0.950192	126.485	0.879584	0.519536	0.933	0.433748
1252	Cathepsin H	Benign tumors of bone and articular cartilage	MR Egger	11	-0.11443	0.0655704	0.114918	-0.242948	0.0140883	0.891875	0.784313	1.01419		0.857993			1
1253	Cathepsin H	Benign tumors of bone and articular cartilage	Weighted median	11	-0.1401	0.051677	0.00670665	-0.241387	-0.038813	0.869271	0.785538	0.961931					0.395692
1254	Cathepsin H	Benign tumors of bone and articular cartilage	Simple mode	11	-0.152166	0.124191	0.248556	-0.395581	0.0912497	0.858846	0.673289	1.09554					1
1255	Cathepsin H	Benign tumors of bone and articular cartilage	Weighted mode	11	-0.13967	0.0512692	0.0214034	-0.240158	-0.0391828	0.869645	0.786503	0.961575					1
1256	Cathepsin H	Benign tumors of bone and articular cartilage	Maximum likelihood	11	-0.144746	0.047966	0.00254716	-0.238759	-0.0507328	0.865242	0.787604	0.950533					0.226697
1257	Cathepsin B	Benign tumors of bone and articular cartilage	Inverse variance weighted	17	-0.0587122	0.0766185	0.443502	-0.208884	0.09146	0.942978	0.811489	1.09577	35.5021	0.350003	0.447802	0.347	1
1258	Cathepsin B	Benign tumors of bone and articular cartilage	MR Egger	17	-0.185847	0.180605	0.319775	-0.539833	0.168138	0.8304	0.582846	1.1831		0.326043			0.959325
1259	Cathepsin B	Benign tumors of bone and articular cartilage	Weighted median	17	-0.0251623	0.112267	0.822657	-0.245206	0.194881	0.975152	0.782543	1.21517					1
1260	Cathepsin B	Benign tumors of bone and articular cartilage	Simple mode	17	0.204832	0.202943	0.327849	-0.192937	0.602601	1.22732	0.824534	1.82686					1
1261	Cathepsin B	Benign tumors of bone and articular cartilage	Weighted mode	17	0.0320353	0.12837	0.806108	-0.219571	0.283641	1.03255	0.802863	1.32796					1
1262	Cathepsin B	Benign tumors of bone and articular cartilage	Maximum likelihood	17	-0.0590117	0.0744989	0.428294	-0.20503	0.0870061	0.942696	0.814623	1.0909					0.876279
1263	Cathepsin O	Benign tumors of bone and articular cartilage	Inverse variance weighted	12	0.0134201	0.140539	0.923925	-0.262037	0.288877	1.01351	0.769483	1.33493	23.2138	0.0160595	0.593951	0.039	0.978921
1264	Cathepsin O	Benign tumors of bone and articular cartilage	MR Egger	12	-0.152532	0.334528	0.658159	-0.808205	0.503142	0.858532	0.445657	1.65391		0.0122866			0.954871
1265	Cathepsin O	Benign tumors of bone and articular cartilage	Weighted median	12	0.158778	0.143415	0.268242	-0.122316	0.439871	1.17208	0.884869	1.55251					1
1266	Cathepsin O	Benign tumors of bone and articular cartilage	Simple mode	12	0.218592	0.247033	0.395158	-0.265592	0.702775	1.24432	0.766752	2.01935					1
1267	Cathepsin O	Benign tumors of bone and articular cartilage	Weighted mode	12	0.218592	0.274349	0.442445	-0.319132	0.756315	1.24432	0.72678	2.13041					1
1268	Cathepsin O	Benign tumors of bone and articular cartilage	Maximum likelihood	12	0.0151214	0.10238	0.882581	-0.185543	0.215786	1.01524	0.830653	1.24084					0.940715
1269	Cathepsin E	Benign tumors of bone and articular cartilage	Inverse variance weighted	10	-0.129643	0.0793709	0.102389	-0.28521	0.025924	0.878409	0.751856	1.02626	21.973	0.726303	0.850763	0.691	1
1270	Cathepsin E	Benign tumors of bone and articular cartilage	MR Egger	10	-0.150396	0.133058	0.291096	-0.41119	0.110398	0.860367	0.662861	1.11672		0.636306			0.972151
1271	Cathepsin E	Benign tumors of bone and articular cartilage	Weighted median	10	-0.246469	0.110822	0.0261485	-0.463681	-0.0292571	0.781556	0.628964	0.971167					0.771379
1272	Cathepsin E	Benign tumors of bone and articular cartilage	Simple mode	10	-0.277671	0.184501	0.166588	-0.639293	0.0839511	0.757546	0.527665	1.08758					1
1273	Cathepsin E	Benign tumors of bone and articular cartilage	Weighted mode	10	-0.266411	0.147547	0.104461	-0.555603	0.0227817	0.766124	0.573726	1.02304					1
1274	Cathepsin E	Benign tumors of bone and articular cartilage	Maximum likelihood	10	-0.1326	0.0801577	0.0980787	-0.289709	0.024509	0.875815	0.748481	1.02481					0.759044
1275	Cathepsin Z	Benign tumors of bone and articular cartilage	Inverse variance weighted	13	-0.102558	0.06809	0.132013	-0.236014	0.0308985	0.902526	0.789769	1.03138	53.4584	0.626416	0.582856	0.543	0.979096
1276	Cathepsin Z	Benign tumors of bone and articular cartilage	MR Egger	13	-0.0547398	0.108525	0.623933	-0.267449	0.15797	0.946731	0.765329	1.17113		0.570286			0.952036
1277	Cathepsin Z	Benign tumors of bone and articular cartilage	Weighted median	13	-0.199453	0.0967155	0.0391824	-0.389015	-0.0098907	0.819179	0.677724	0.990158					0.990756
1278	Cathepsin Z	Benign tumors of bone and articular cartilage	Simple mode	13	-0.308258	0.172359	0.0989557	-0.646082	0.0295654	0.734726	0.524095	1.03001					1
1279	Cathepsin Z	Benign tumors of bone and articular cartilage	Weighted mode	13	-0.183628	0.126334	0.171731	-0.431243	0.0639876	0.832246	0.649701	1.06608					1
1280	Cathepsin Z	Benign tumors of bone and articular cartilage	Maximum likelihood	13	-0.105215	0.0687044	0.125666	-0.239876	0.0294454	0.900131	0.786725	1.02988					0.721565
1281	Cathepsin L2	Benign tumors of bone and articular cartilage	Inverse variance weighted	11	-0.0168968	0.114218	0.882394	-0.240763	0.20697	0.983245	0.786028	1.22995	24.6843	0.357254	0.514473	0.386	0.981664
1282	Cathepsin L2	Benign tumors of bone and articular cartilage	MR Egger	11	0.185217	0.320162	0.577107	-0.4423	0.812734	1.20348	0.642557	2.25406		0.313956			0.903965
1283	Cathepsin L2	Benign tumors of bone and articular cartilage	Weighted median	11	-0.0177019	0.143696	0.901957	-0.299346	0.263942	0.982454	0.741303	1.30205					0.961725
1284	Cathepsin L2	Benign tumors of bone and articular cartilage	Simple mode	11	0.0286512	0.241168	0.907785	-0.444037	0.50134	1.02907	0.641441	1.65093					1
1285	Cathepsin L2	Benign tumors of bone and articular cartilage	Weighted mode	11	0.0739506	0.19266	0.709131	-0.303662	0.451563	1.07675	0.73811	1.57077					1
1286	Cathepsin L2	Benign tumors of bone and articular cartilage	Maximum likelihood	11	-0.0174833	0.11102	0.874868	-0.235083	0.200117	0.982669	0.790505	1.22155					0.943797
1287	Cathepsin S	Myositis	Inverse variance weighted	24	-0.0826056	0.116573	0.478563	-0.311089	0.145878	0.920714	0.732649	1.15706	39.7152	0.378402	0.41871	0.434	1
1288	Cathepsin S	Myositis	MR Egger	24	-0.218927	0.202837	0.292134	-0.616488	0.178633	0.80338	0.539837	1.19558		0.361373			0.95755
1289	Cathepsin S	Myositis	Weighted median	24	-0.033163	0.165163	0.840863	-0.356882	0.290556	0.967381	0.699855	1.33717					0.979163
1290	Cathepsin S	Myositis	Simple mode	24	-0.40937	0.343117	0.244996	-1.08188	0.263139	0.664068	0.338958	1.30101					1
1291	Cathepsin S	Myositis	Weighted mode	24	-0.0313453	0.161868	0.848153	-0.348607	0.285917	0.969141	0.70567	1.33098					1
1292	Cathepsin S	Myositis	Maximum likelihood	24	-0.082911	0.114918	0.470614	-0.30815	0.142328	0.920433	0.734805	1.15295					0.891162
1293	Cathepsin F	Myositis	Inverse variance weighted	12	-0.106024	0.168969	0.530348	-0.437204	0.225156	0.899403	0.64584	1.25252	36.6058	0.160082	0.211536	0.148	0.953556
1294	Cathepsin F	Myositis	MR Egger	12	0.355051	0.382069	0.374629	-0.393804	1.10391	1.42625	0.674486	3.01592		0.214355			1
1295	Cathepsin F	Myositis	Weighted median	12	-0.0694674	0.213443	0.744832	-0.487816	0.348881	0.932891	0.613966	1.41748					1
1296	Cathepsin F	Myositis	Simple mode	12	-0.013796	0.368407	0.970799	-0.735874	0.708282	0.986299	0.479086	2.0305					1
1297	Cathepsin F	Myositis	Weighted mode	12	-0.195422	0.294105	0.520079	-0.771867	0.381023	0.822487	0.462149	1.46378					1
1298	Cathepsin F	Myositis	Maximum likelihood	12	-0.105201	0.145817	0.470629	-0.391003	0.180601	0.900144	0.676378	1.19794					0.881811
1299	Cathepsin G	Myositis	Inverse variance weighted	13	0.144919	0.16934	0.392116	-0.186988	0.476826	1.15595	0.829454	1.61095	22.9823	0.347069	0.388593	0.439	1
1300	Cathepsin G	Myositis	MR Egger	13	0.399703	0.331223	0.252839	-0.249494	1.0489	1.49138	0.779195	2.85451		0.334373			1
1301	Cathepsin G	Myositis	Weighted median	13	0.184678	0.22489	0.411537	-0.256107	0.625463	1.20283	0.774059	1.86911					0.922051
1302	Cathepsin G	Myositis	Simple mode	13	0.0979382	0.330723	0.77219	-0.550278	0.746154	1.10289	0.576789	2.10887					1
1303	Cathepsin G	Myositis	Weighted mode	13	0.190666	0.24059	0.443458	-0.28089	0.662222	1.21006	0.755111	1.9391					1
1304	Cathepsin G	Myositis	Maximum likelihood	13	0.152222	0.163089	0.350629	-0.167432	0.471875	1.16442	0.845834	1.603					0.879042
1305	Cathepsin H	Myositis	Inverse variance weighted	11	-0.0215733	0.10085	0.830614	-0.21924	0.176093	0.978658	0.803129	1.19255	126.485	0.242412	0.233076	0.455	0.966335
1306	Cathepsin H	Myositis	MR Egger	11	0.0962933	0.134402	0.491882	-0.167135	0.359722	1.10108	0.846085	1.43293		0.294887			0.926203
1307	Cathepsin H	Myositis	Weighted median	11	0.00252398	0.0988277	0.979625	-0.191178	0.196226	1.00253	0.825985	1.2168					0.985191
1308	Cathepsin H	Myositis	Simple mode	11	-0.204695	0.255174	0.441096	-0.704837	0.295446	0.814895	0.494189	1.34373					1
1309	Cathepsin H	Myositis	Weighted mode	11	-0.0122702	0.100079	0.904849	-0.208425	0.183884	0.987805	0.811862	1.20188					1
1310	Cathepsin H	Myositis	Maximum likelihood	11	-0.0217123	0.089943	0.809245	-0.198001	0.154576	0.978522	0.820369	1.16716					0.953944
1311	Cathepsin B	Myositis	Inverse variance weighted	17	-0.0686195	0.153657	0.655181	-0.369787	0.232548	0.933682	0.690882	1.26181	35.5021	0.221552	0.464703	0.252	0.971852
1312	Cathepsin B	Myositis	MR Egger	17	-0.314343	0.362686	0.399753	-1.02521	0.396521	0.730268	0.358722	1.48664		0.202706			0.982727
1313	Cathepsin B	Myositis	Weighted median	17	-0.0304605	0.199814	0.878837	-0.422096	0.361175	0.969999	0.655671	1.43501					0.98452
1314	Cathepsin B	Myositis	Simple mode	17	-0.216824	0.311976	0.497024	-0.828298	0.39465	0.805072	0.436792	1.48386					1
1315	Cathepsin B	Myositis	Weighted mode	17	-0.0616583	0.218143	0.781068	-0.489218	0.365901	0.940204	0.613106	1.44181					1
1316	Cathepsin B	Myositis	Maximum likelihood	17	-0.0703079	0.139971	0.615455	-0.344652	0.204036	0.932107	0.708467	1.22634					0.912925
1317	Cathepsin O	Myositis	Inverse variance weighted	12	-0.105344	0.202604	0.603099	-0.502447	0.29176	0.900015	0.605048	1.33878	23.2138	0.258316	0.488069	0.276	0.958497
1318	Cathepsin O	Myositis	MR Egger	12	-0.415187	0.477671	0.405121	-1.35142	0.521047	0.660217	0.258872	1.68379		0.229793			0.956086
1319	Cathepsin O	Myositis	Weighted median	12	-0.268895	0.250995	0.284027	-0.760845	0.223055	0.764223	0.467271	1.24989					1
1320	Cathepsin O	Myositis	Simple mode	12	-0.203208	0.35667	0.580306	-0.902282	0.495866	0.816109	0.405643	1.64192					1
1321	Cathepsin O	Myositis	Weighted mode	12	-0.214198	0.345848	0.548304	-0.892061	0.463664	0.807188	0.40981	1.58989					1
1322	Cathepsin O	Myositis	Maximum likelihood	12	-0.109323	0.186876	0.558544	-0.4756	0.256953	0.896441	0.621512	1.29298					0.903826
1323	Cathepsin E	Myositis	Inverse variance weighted	10	0.0752442	0.150149	0.616279	-0.219048	0.369536	1.07815	0.803283	1.44706	21.973	0.913839	0.71817	0.901	0.937588
1324	Cathepsin E	Myositis	MR Egger	10	0.150842	0.251827	0.565752	-0.34274	0.644424	1.16281	0.709823	1.90489		0.872726			0.927204
1325	Cathepsin E	Myositis	Weighted median	10	0.0805245	0.195139	0.679861	-0.301947	0.462996	1.08386	0.739377	1.58883					1
1326	Cathepsin E	Myositis	Simple mode	10	0.242116	0.322331	0.47175	-0.389652	0.873884	1.27394	0.677292	2.3962					1
1327	Cathepsin E	Myositis	Weighted mode	10	0.242116	0.268922	0.391404	-0.284971	0.769203	1.27394	0.752036	2.15805					1
1328	Cathepsin E	Myositis	Maximum likelihood	10	0.0766691	0.151955	0.613873	-0.221162	0.3745	1.07968	0.801587	1.45426					0.91823
1329	Cathepsin Z	Myositis	Inverse variance weighted	13	-0.140271	0.129388	0.278313	-0.393871	0.113328	0.869122	0.674441	1.12	53.4584	0.418647	0.0791019	0.362	0.971366
1330	Cathepsin Z	Myositis	MR Egger	13	0.162825	0.202019	0.437326	-0.233132	0.558783	1.17683	0.792049	1.74854		0.659022			0.921509
1331	Cathepsin Z	Myositis	Weighted median	13	0.0576243	0.188353	0.759652	-0.311547	0.426796	1.05932	0.732313	1.53234					0.988664
1332	Cathepsin Z	Myositis	Simple mode	13	0.174063	0.330398	0.607913	-0.473516	0.821642	1.19013	0.622809	2.27423					1
1333	Cathepsin Z	Myositis	Weighted mode	13	0.174063	0.231184	0.466013	-0.279058	0.627185	1.19013	0.756496	1.87233					1
1334	Cathepsin Z	Myositis	Maximum likelihood	13	-0.141152	0.129013	0.273915	-0.394018	0.111714	0.868357	0.674342	1.11819					0.870659
1335	Cathepsin L2	Myositis	Inverse variance weighted	11	-0.602363	0.205521	0.00337978	-1.00518	-0.199541	0.547516	0.365977	0.819106	24.6843	0.597379	0.17051	0.667	0.200533
1336	Cathepsin L2	Myositis	MR Egger	11	0.172799	0.559492	0.764465	-0.923806	1.2694	1.18863	0.397005	3.55873		0.729523			0.959648
1337	Cathepsin L2	Myositis	Weighted median	11	-0.648357	0.272687	0.017423	-1.18282	-0.11389	0.522904	0.306412	0.892356					0.616775
1338	Cathepsin L2	Myositis	Simple mode	11	-0.79607	0.420075	0.0873298	-1.61942	0.0272767	0.451098	0.198014	1.02765					1
1339	Cathepsin L2	Myositis	Weighted mode	11	-0.574445	0.325559	0.108114	-1.21254	0.0636505	0.563017	0.29744	1.06572					1
1340	Cathepsin L2	Myositis	Maximum likelihood	11	-0.605591	0.210651	0.00404205	-1.01847	-0.192716	0.545752	0.361148	0.824716					0.239829
1341	Cathepsin S	Synovitis and tenosynovitis	Inverse variance weighted	24	7.11e-05	0.000283424	0.80184	-0.000484381	0.00062664	1.00007	0.999516	1.00063	39.7152	0.898385	0.479157	0.921	0.991164
1342	Cathepsin S	Synovitis and tenosynovitis	MR Egger	24	-0.000203904	0.00047569	0.672347	-0.00113626	0.000728449	0.999796	0.998864	1.00073		0.887601			0.952043
1343	Cathepsin S	Synovitis and tenosynovitis	Weighted median	24	3.33e-05	0.00040315	0.934168	-0.000756874	0.000823476	1.00003	0.999243	1.00082					0.966946
1344	Cathepsin S	Synovitis and tenosynovitis	Simple mode	24	-8.51e-05	0.000716549	0.906448	-0.00148958	0.00131929	0.999915	0.998512	1.00132					1
1345	Cathepsin S	Synovitis and tenosynovitis	Weighted mode	24	1.76e-05	0.000418646	0.966815	-0.000802939	0.000838155	1.00002	0.999197	1.00084					1
1346	Cathepsin S	Synovitis and tenosynovitis	Maximum likelihood	24	7.22e-05	0.000285832	0.800611	-0.000488043	0.00063242	1.00007	0.999512	1.00063					0.976088
1347	Cathepsin F	Synovitis and tenosynovitis	Inverse variance weighted	12	-9.86e-05	0.000408565	0.809296	-0.000899389	0.000702187	0.999901	0.999101	1.0007	36.6058	0.685133	0.95013	0.723	0.979964
1348	Cathepsin F	Synovitis and tenosynovitis	MR Egger	12	-0.000158053	0.0010131	0.87913	-0.00214372	0.00182762	0.999842	0.997859	1.00183		0.598813			0.984848
1349	Cathepsin F	Synovitis and tenosynovitis	Weighted median	12	0.00017937	0.000556555	0.747236	-0.000911477	0.00127022	1.00018	0.999089	1.00127					1
1350	Cathepsin F	Synovitis and tenosynovitis	Simple mode	12	0.000243559	0.000832406	0.775276	-0.00138796	0.00187507	1.00024	0.998613	1.00188					1
1351	Cathepsin F	Synovitis and tenosynovitis	Weighted mode	12	0.000299944	0.000626042	0.641242	-0.000927098	0.00152699	1.0003	0.999073	1.00153					1
1352	Cathepsin F	Synovitis and tenosynovitis	Maximum likelihood	12	-0.000100295	0.000412606	0.807946	-0.000909003	0.000708414	0.9999	0.999091	1.00071					0.958763
1353	Cathepsin G	Synovitis and tenosynovitis	Inverse variance weighted	15	-0.000414123	0.000486417	0.394561	-0.0013675	0.000539254	0.999586	0.998633	1.00054	22.8206	0.387364	0.174486	0.382	1
1354	Cathepsin G	Synovitis and tenosynovitis	MR Egger	15	-0.00168428	0.00100231	0.116735	-0.0036488	0.000280246	0.998317	0.996358	1.00028		0.463171			1
1355	Cathepsin G	Synovitis and tenosynovitis	Weighted median	15	-0.000138196	0.000643347	0.829917	-0.00139916	0.00112276	0.999862	0.998602	1.00112					0.985875
1356	Cathepsin G	Synovitis and tenosynovitis	Simple mode	15	-0.000367574	0.00135454	0.790071	-0.00302247	0.00228732	0.999632	0.996982	1.00229					1
1357	Cathepsin G	Synovitis and tenosynovitis	Weighted mode	15	-0.00021849	0.00121906	0.860327	-0.00260784	0.00217086	0.999782	0.997396	1.00217					1
1358	Cathepsin G	Synovitis and tenosynovitis	Maximum likelihood	15	-0.000429488	0.000484121	0.374998	-0.00137837	0.000519389	0.999571	0.998623	1.00052					0.866878
1359	Cathepsin H	Synovitis and tenosynovitis	Inverse variance weighted	11	0.000658011	0.000284984	0.0209467	9.94e-05	0.00121658	1.00066	1.0001	1.00122	126.485	0.264374	0.0233818	0.301	0.532644
1360	Cathepsin H	Synovitis and tenosynovitis	MR Egger	11	0.0013303	0.000356039	0.00465126	0.000632468	0.00202814	1.00133	1.00063	1.00203		0.844045			0.411637
1361	Cathepsin H	Synovitis and tenosynovitis	Weighted median	11	0.000840389	0.000278263	0.00252668	0.000294994	0.00138578	1.00084	1.0003	1.00139					0.223611
1362	Cathepsin H	Synovitis and tenosynovitis	Simple mode	11	-0.00166576	0.00110545	0.162767	-0.00383244	0.000500927	0.998336	0.996175	1.0005					1
1363	Cathepsin H	Synovitis and tenosynovitis	Weighted mode	11	0.000907036	0.000282114	0.00925106	0.000354093	0.00145998	1.00091	1.00035	1.00146					0.818719
1364	Cathepsin H	Synovitis and tenosynovitis	Maximum likelihood	11	0.000669645	0.000259112	0.0097553	0.000161785	0.0011775	1.00067	1.00016	1.00118					0.248063
1365	Cathepsin B	Synovitis and tenosynovitis	Inverse variance weighted	18	-0.000155464	0.000345437	0.652674	-0.000832522	0.000521593	0.999845	0.999168	1.00052	34.9465	0.650058	0.149216	0.49	0.976269
1366	Cathepsin B	Synovitis and tenosynovitis	MR Egger	18	-0.00128942	0.000824245	0.137293	-0.00290494	0.000326099	0.998711	0.997099	1.00033		0.747834			1
1367	Cathepsin B	Synovitis and tenosynovitis	Weighted median	18	-0.000261373	0.000477517	0.584132	-0.00119731	0.00067456	0.999739	0.998803	1.00067					1
1368	Cathepsin B	Synovitis and tenosynovitis	Simple mode	18	0.000452692	0.00105205	0.672386	-0.00160932	0.00251471	1.00045	0.998392	1.00252					1
1369	Cathepsin B	Synovitis and tenosynovitis	Weighted mode	18	-0.00115477	0.000576174	0.0612463	-0.00228408	-2.55e-05	0.998846	0.997719	0.999975					1
1370	Cathepsin B	Synovitis and tenosynovitis	Maximum likelihood	18	-0.000159099	0.000349459	0.648913	-0.000844039	0.00052584	0.999841	0.999156	1.00053					0.931503
1371	Cathepsin O	Synovitis and tenosynovitis	Inverse variance weighted	11	-0.000103802	0.000621362	0.867326	-0.00132167	0.00111407	0.999896	0.998679	1.00111	22.8192	0.20079	0.467345	0.219	0.970969
1372	Cathepsin O	Synovitis and tenosynovitis	MR Egger	11	-0.00112734	0.00149077	0.468854	-0.00404925	0.00179458	0.998873	0.995959	1.0018		0.180611			0.976319
1373	Cathepsin O	Synovitis and tenosynovitis	Weighted median	11	-0.00024096	0.000742653	0.745592	-0.00169656	0.00121464	0.999759	0.998305	1.00122					1
1374	Cathepsin O	Synovitis and tenosynovitis	Simple mode	11	-0.000968156	0.00143389	0.514859	-0.00377857	0.00184226	0.999032	0.996229	1.00184					1
1375	Cathepsin O	Synovitis and tenosynovitis	Weighted mode	11	-0.000861902	0.00134186	0.535112	-0.00349194	0.00176813	0.999138	0.996514	1.00177					1
1376	Cathepsin O	Synovitis and tenosynovitis	Maximum likelihood	11	-0.00011201	0.000551111	0.838945	-0.00119219	0.000968168	0.999888	0.998809	1.00097					0.945141
1377	Cathepsin E	Synovitis and tenosynovitis	Inverse variance weighted	11	-0.00119316	0.000550464	0.0301926	-0.00227207	-0.000114251	0.998808	0.997731	0.999886	21.9151	0.746618	0.234869	0.731	0.597142
1378	Cathepsin E	Synovitis and tenosynovitis	MR Egger	11	-0.00260148	0.00123558	0.0645416	-0.00502322	-0.000179752	0.997402	0.994989	0.99982		0.820784			1
1379	Cathepsin E	Synovitis and tenosynovitis	Weighted median	11	-0.000904265	0.000722918	0.210988	-0.00232118	0.000512654	0.999096	0.997682	1.00051					1
1380	Cathepsin E	Synovitis and tenosynovitis	Simple mode	11	-2.74e-05	0.00134143	0.984077	-0.00265665	0.00260176	0.999973	0.997347	1.00261					1
1381	Cathepsin E	Synovitis and tenosynovitis	Weighted mode	11	-2.74e-05	0.001213	0.982391	-0.00240492	0.00235002	0.999973	0.997598	1.00235					0.999329
1382	Cathepsin E	Synovitis and tenosynovitis	Maximum likelihood	11	-0.0012219	0.000563294	0.0300664	-0.00232596	-0.000117849	0.998779	0.997677	0.999882					0.535182
1383	Cathepsin Z	Synovitis and tenosynovitis	Inverse variance weighted	12	0.000571284	0.00038891	0.14185	-0.00019098	0.00133355	1.00057	0.999809	1.00133	55.9291	0.229126	0.134632	0.305	0.971129
1384	Cathepsin Z	Synovitis and tenosynovitis	MR Egger	12	-0.000131468	0.000563839	0.820336	-0.00123659	0.000973657	0.999869	0.998764	1.00097		0.348006			0.987751
1385	Cathepsin Z	Synovitis and tenosynovitis	Weighted median	12	0.000452417	0.00045489	0.319948	-0.000439167	0.001344	1.00045	0.999561	1.00134					0.943847
1386	Cathepsin Z	Synovitis and tenosynovitis	Simple mode	12	0.00163989	0.000812678	0.0686652	4.7e-05	0.00323274	1.00164	1.00005	1.00324					1
1387	Cathepsin Z	Synovitis and tenosynovitis	Weighted mode	12	0.000428956	0.000437605	0.348037	-0.00042875	0.00128666	1.00043	0.999571	1.00129					1
1388	Cathepsin Z	Synovitis and tenosynovitis	Maximum likelihood	12	0.000589911	0.000348586	0.0905897	-9.33e-05	0.00127314	1.00059	0.999907	1.00127					0.767856
1389	Cathepsin L2	Synovitis and tenosynovitis	Inverse variance weighted	11	0.000403133	0.000519797	0.438009	-0.000615668	0.00142194	1.0004	0.999385	1.00142	24.6843	0.662385	0.778896	0.655	1
1390	Cathepsin L2	Synovitis and tenosynovitis	MR Egger	11	0.000716083	0.00120011	0.565425	-0.00163613	0.00306829	1.00072	0.998365	1.00307		0.57774			0.935328
1391	Cathepsin L2	Synovitis and tenosynovitis	Weighted median	11	-0.000158912	0.000704575	0.821557	-0.00153988	0.00122206	0.999841	0.998461	1.00122					1
1392	Cathepsin L2	Synovitis and tenosynovitis	Simple mode	11	-0.000268127	0.00112692	0.81674	-0.00247689	0.00194063	0.999732	0.997526	1.00194					1
1393	Cathepsin L2	Synovitis and tenosynovitis	Weighted mode	11	-0.000302117	0.0010439	0.778178	-0.00234817	0.00174393	0.999698	0.997655	1.00175					1
1394	Cathepsin L2	Synovitis and tenosynovitis	Maximum likelihood	11	0.000413197	0.000527923	0.433812	-0.000621532	0.00144793	1.00041	0.999379	1.00145					0.877484
1395	Cathepsin B	Radial styloid process tenosynovitis	Inverse variance weighted	17	-0.122729	0.0920011	0.182205	-0.303052	0.0575929	0.884503	0.738561	1.05928	35.5021	0.786302	0.405454	0.8	1
1396	Cathepsin B	Radial styloid process tenosynovitis	MR Egger	17	0.0431338	0.214493	0.843325	-0.377273	0.463541	1.04408	0.685729	1.58969		0.778083			0.969276
1397	Cathepsin B	Radial styloid process tenosynovitis	Weighted median	17	-0.124052	0.126399	0.32638	-0.371795	0.123691	0.883334	0.689496	1.13167					0.931764
1398	Cathepsin B	Radial styloid process tenosynovitis	Simple mode	17	-0.235941	0.205751	0.268354	-0.639213	0.167332	0.789827	0.527707	1.18215					1
1399	Cathepsin B	Radial styloid process tenosynovitis	Weighted mode	17	-0.100224	0.1568	0.53175	-0.407553	0.207105	0.904635	0.665276	1.23011					1
1400	Cathepsin B	Radial styloid process tenosynovitis	Maximum likelihood	17	-0.124065	0.092832	0.181402	-0.306016	0.0578852	0.883322	0.736375	1.05959					0.89693
1401	Cathepsin F	Radial styloid process tenosynovitis	Inverse variance weighted	12	0.183816	0.0943271	0.0513302	-0.00106504	0.368697	1.20179	0.998936	1.44585	36.6058	0.510895	0.308907	0.477	0.702829
1402	Cathepsin F	Radial styloid process tenosynovitis	MR Egger	12	0.398098	0.221027	0.101865	-0.0351156	0.831311	1.48899	0.965494	2.29633		0.525591			1
1403	Cathepsin F	Radial styloid process tenosynovitis	Weighted median	12	0.0862147	0.133478	0.518337	-0.175401	0.347831	1.09004	0.83912	1.41599					0.976017
1404	Cathepsin F	Radial styloid process tenosynovitis	Simple mode	12	-0.0293026	0.226372	0.899343	-0.472992	0.414387	0.971123	0.623135	1.51344					1
1405	Cathepsin F	Radial styloid process tenosynovitis	Weighted mode	12	0.0578474	0.194554	0.771752	-0.323479	0.439174	1.05955	0.723627	1.55142					1
1406	Cathepsin F	Radial styloid process tenosynovitis	Maximum likelihood	12	0.188388	0.0961851	0.0501599	-0.000134848	0.376911	1.2073	0.999865	1.45777					0.686805
1407	Cathepsin G	Radial styloid process tenosynovitis	Inverse variance weighted	13	0.142383	0.106249	0.180217	-0.0658653	0.350632	1.15302	0.936257	1.41996	22.9823	0.717361	0.315056	0.731	1
1408	Cathepsin G	Radial styloid process tenosynovitis	MR Egger	13	-0.0432669	0.20589	0.837396	-0.446811	0.360277	0.957656	0.639665	1.43373		0.737966			0.975125
1409	Cathepsin G	Radial styloid process tenosynovitis	Weighted median	13	0.173914	0.148076	0.240198	-0.116315	0.464144	1.18995	0.890195	1.59065					1
1410	Cathepsin G	Radial styloid process tenosynovitis	Simple mode	13	0.233288	0.24717	0.36387	-0.251166	0.717741	1.26274	0.777894	2.0498					1
1411	Cathepsin G	Radial styloid process tenosynovitis	Weighted mode	13	0.179557	0.158594	0.279675	-0.131287	0.490401	1.19669	0.876966	1.63297					1
1412	Cathepsin G	Radial styloid process tenosynovitis	Maximum likelihood	13	0.148158	0.108304	0.171319	-0.0641185	0.360434	1.1597	0.937894	1.43395					0.871281
1413	Cathepsin E	Radial styloid process tenosynovitis	Inverse variance weighted	10	-0.0630382	0.0986265	0.522718	-0.256346	0.13027	0.938908	0.773874	1.13914	21.973	0.708541	0.0689687	0.701	0.969206
1414	Cathepsin E	Radial styloid process tenosynovitis	MR Egger	10	0.21473	0.165008	0.229368	-0.108685	0.538145	1.23953	0.897013	1.71283		0.983893			1
1415	Cathepsin E	Radial styloid process tenosynovitis	Weighted median	10	0.0359338	0.137269	0.793494	-0.233113	0.304981	1.03659	0.792064	1.3566					0.996088
1416	Cathepsin E	Radial styloid process tenosynovitis	Simple mode	10	0.0509591	0.211331	0.814855	-0.36325	0.465168	1.05228	0.695413	1.59228					1
1417	Cathepsin E	Radial styloid process tenosynovitis	Weighted mode	10	0.0686025	0.146901	0.651601	-0.219324	0.356529	1.07101	0.803061	1.42836					1
1418	Cathepsin E	Radial styloid process tenosynovitis	Maximum likelihood	10	-0.0638602	0.10079	0.526343	-0.261408	0.133688	0.938136	0.769967	1.14304					0.875599
1419	Cathepsin H	Radial styloid process tenosynovitis	Inverse variance weighted	11	0.0237495	0.0594079	0.689325	-0.09269	0.140189	1.02403	0.911476	1.15049	126.485	0.970609	0.400628	0.828	0.99756
1420	Cathepsin H	Radial styloid process tenosynovitis	MR Egger	11	-0.0257305	0.081702	0.759993	-0.185866	0.134405	0.974598	0.830385	1.14386		0.977638			0.967761
1421	Cathepsin H	Radial styloid process tenosynovitis	Weighted median	11	0.00304274	0.0651939	0.962775	-0.124737	0.130823	1.00305	0.882729	1.13977					0.979374
1422	Cathepsin H	Radial styloid process tenosynovitis	Simple mode	11	0.185489	0.165938	0.289778	-0.13975	0.510728	1.20381	0.869576	1.6665					1
1423	Cathepsin H	Radial styloid process tenosynovitis	Weighted mode	11	-0.00677551	0.0687871	0.923482	-0.141598	0.128047	0.993247	0.86797	1.13661					1
1424	Cathepsin H	Radial styloid process tenosynovitis	Maximum likelihood	11	0.023712	0.0594891	0.690193	-0.0928866	0.140311	1.024	0.911297	1.15063					0.967356
1425	Cathepsin O	Radial styloid process tenosynovitis	Inverse variance weighted	12	-0.202089	0.172589	0.241628	-0.540363	0.136185	0.817022	0.582537	1.14589	23.2138	0.0202069	0.751906	0.017	1
1426	Cathepsin O	Radial styloid process tenosynovitis	MR Egger	12	-0.0807214	0.414622	0.849537	-0.893381	0.731938	0.922451	0.40927	2.07911		0.0134177			0.957758
1427	Cathepsin O	Radial styloid process tenosynovitis	Weighted median	12	-0.0276695	0.193432	0.886255	-0.406796	0.351457	0.97271	0.66578	1.42114					0.980419
1428	Cathepsin O	Radial styloid process tenosynovitis	Simple mode	12	-0.41316	0.328106	0.234014	-1.05625	0.229928	0.661556	0.347758	1.25851					1
1429	Cathepsin O	Radial styloid process tenosynovitis	Weighted mode	12	0.0172676	0.276573	0.951337	-0.524815	0.55935	1.01742	0.591665	1.74953					1
1430	Cathepsin O	Radial styloid process tenosynovitis	Maximum likelihood	12	-0.19622	0.126219	0.120041	-0.44361	0.0511689	0.821831	0.641716	1.0525					0.79138
1431	Cathepsin S	Radial styloid process tenosynovitis	Inverse variance weighted	24	0.0949429	0.0844587	0.260956	-0.0705961	0.260482	1.0996	0.931838	1.29756	24.6843	0.161645	0.67208	0.199	0.988302
1432	Cathepsin S	Radial styloid process tenosynovitis	MR Egger	24	0.146659	0.148076	0.332733	-0.14357	0.436887	1.15796	0.86626	1.54788		0.135381			0.96547
1433	Cathepsin S	Radial styloid process tenosynovitis	Weighted median	24	0.141768	0.115192	0.218431	-0.0840083	0.367545	1.15231	0.919424	1.44418					1
1434	Cathepsin S	Radial styloid process tenosynovitis	Simple mode	24	0.0364211	0.200783	0.857646	-0.357114	0.429956	1.03709	0.699693	1.53719					1
1435	Cathepsin S	Radial styloid process tenosynovitis	Weighted mode	24	0.138791	0.105513	0.20134	-0.0680138	0.345596	1.14888	0.934248	1.41283					1
1436	Cathepsin S	Radial styloid process tenosynovitis	Maximum likelihood	24	0.0989899	0.0758905	0.192105	-0.0497555	0.247735	1.10406	0.951462	1.28112					0.92418
1437	Cathepsin L2	Radial styloid process tenosynovitis	Inverse variance weighted	11	-0.0310194	0.135779	0.819293	-0.297147	0.235108	0.969457	0.742935	1.26505	24.6843	0.81613	0.998648	0.844	0.978753
1438	Cathepsin L2	Radial styloid process tenosynovitis	MR Egger	11	-0.0304201	0.369846	0.936248	-0.755319	0.694478	0.970038	0.469861	2.00266		0.740951			0.99231
1439	Cathepsin L2	Radial styloid process tenosynovitis	Weighted median	11	0.0273678	0.177984	0.877795	-0.321482	0.376217	1.02775	0.725074	1.45676					0.989616
1440	Cathepsin L2	Radial styloid process tenosynovitis	Simple mode	11	0.015585	0.257308	0.952896	-0.488739	0.519909	1.01571	0.613399	1.68187					1
1441	Cathepsin L2	Radial styloid process tenosynovitis	Weighted mode	11	0.0392096	0.198719	0.847536	-0.350279	0.428699	1.03999	0.704491	1.53526					1
1442	Cathepsin L2	Radial styloid process tenosynovitis	Maximum likelihood	11	-0.031659	0.137119	0.817403	-0.300413	0.237095	0.968837	0.740513	1.26756					0.957222
1443	Cathepsin Z	Radial styloid process tenosynovitis	Inverse variance weighted	13	0.143135	0.0873503	0.101289	-0.0280712	0.314342	1.15389	0.972319	1.36936	53.4584	0.392909	0.68402	0.476	1
1444	Cathepsin Z	Radial styloid process tenosynovitis	MR Egger	13	0.0960541	0.144508	0.519937	-0.187182	0.37929	1.10082	0.829293	1.46125		0.328711			0.929584
1445	Cathepsin Z	Radial styloid process tenosynovitis	Weighted median	13	0.0867219	0.10968	0.429128	-0.12825	0.301694	1.09059	0.879633	1.35215					0.937725
1446	Cathepsin Z	Radial styloid process tenosynovitis	Simple mode	13	-0.0135319	0.170978	0.938222	-0.348649	0.321585	0.986559	0.705641	1.37931					1
1447	Cathepsin Z	Radial styloid process tenosynovitis	Weighted mode	13	0.086615	0.111935	0.454025	-0.132777	0.306007	1.09048	0.87566	1.35799					1
1448	Cathepsin Z	Radial styloid process tenosynovitis	Maximum likelihood	13	0.144813	0.0859035	0.0918412	-0.0235578	0.313184	1.15582	0.976718	1.36777					0.743079
1449	Cathepsin B	Spinal canal stenosis	Inverse variance weighted	17	0.0356763	0.0294845	0.226279	-0.0221134	0.0934659	1.03632	0.978129	1.09797	35.5021	0.602208	0.863531	0.653	1
1450	Cathepsin B	Spinal canal stenosis	MR Egger	17	0.0465198	0.0686664	0.50842	-0.0880664	0.181106	1.04762	0.9157	1.19854		0.531413			0.927735
1451	Cathepsin B	Spinal canal stenosis	Weighted median	17	0.050727	0.0435048	0.243611	-0.0345424	0.135996	1.05204	0.966047	1.14568					1
1452	Cathepsin B	Spinal canal stenosis	Simple mode	17	0.046334	0.0623691	0.46831	-0.0759094	0.168577	1.04742	0.9269	1.18362					1
1453	Cathepsin B	Spinal canal stenosis	Weighted mode	17	0.0425679	0.0487451	0.39543	-0.0529725	0.138108	1.04349	0.948406	1.1481					1
1454	Cathepsin B	Spinal canal stenosis	Maximum likelihood	17	0.0362596	0.0298459	0.224406	-0.0222384	0.0947576	1.03693	0.978007	1.09939					0.907826
1455	Cathepsin F	Spinal canal stenosis	Inverse variance weighted	12	0.0459483	0.03226	0.154356	-0.0172813	0.109178	1.04702	0.982867	1.11536	36.6058	0.33347	0.655864	0.275	1
1456	Cathepsin F	Spinal canal stenosis	MR Egger	12	0.0784786	0.0783465	0.340117	-0.0750805	0.232038	1.08164	0.927669	1.26117		0.274765			0.970978
1457	Cathepsin F	Spinal canal stenosis	Weighted median	12	0.0584946	0.04455	0.18918	-0.0288235	0.145813	1.06024	0.971588	1.15698					1
1458	Cathepsin F	Spinal canal stenosis	Simple mode	12	0.099901	0.077406	0.223306	-0.0518147	0.251617	1.10506	0.949505	1.2861					1
1459	Cathepsin F	Spinal canal stenosis	Weighted mode	12	0.065562	0.058071	0.282919	-0.0482572	0.179381	1.06776	0.952889	1.19648					1
1460	Cathepsin F	Spinal canal stenosis	Maximum likelihood	12	0.0473132	0.0307738	0.124183	-0.0130034	0.10763	1.04845	0.987081	1.11364					0.762224
1461	Cathepsin G	Spinal canal stenosis	Inverse variance weighted	13	0.00293387	0.0342887	0.931813	-0.064272	0.0701397	1.00294	0.93775	1.07266	22.9823	0.588835	0.938601	0.56	0.964318
1462	Cathepsin G	Spinal canal stenosis	MR Egger	13	0.00741411	0.0663905	0.913093	-0.122711	0.137539	1.00744	0.884519	1.14745		0.503337			0.991519
1463	Cathepsin G	Spinal canal stenosis	Weighted median	13	0.0409215	0.0461492	0.375228	-0.0495309	0.131374	1.04177	0.951676	1.14039					0.962542
1464	Cathepsin G	Spinal canal stenosis	Simple mode	13	0.0215872	0.0905011	0.815495	-0.155795	0.198969	1.02182	0.855735	1.22014					1
1465	Cathepsin G	Spinal canal stenosis	Weighted mode	13	0.0460951	0.0595055	0.453549	-0.0705358	0.162726	1.04717	0.931894	1.17671					1
1466	Cathepsin G	Spinal canal stenosis	Maximum likelihood	13	0.00296212	0.0349733	0.932502	-0.0655855	0.0715097	1.00297	0.936519	1.07413					0.965032
1467	Cathepsin E	Spinal canal stenosis	Inverse variance weighted	10	-0.0365391	0.0434183	0.400033	-0.121639	0.0485606	0.96412	0.885468	1.04976	21.973	0.0517624	0.0915425	0.082	1
1468	Cathepsin E	Spinal canal stenosis	MR Egger	10	-0.134525	0.0637649	0.0679055	-0.259504	-0.0095453	0.874131	0.771434	0.9905		0.173969			1
1469	Cathepsin E	Spinal canal stenosis	Weighted median	10	-0.0768805	0.0445368	0.0843067	-0.164173	0.0104115	0.926	0.848596	1.01047					1
1470	Cathepsin E	Spinal canal stenosis	Simple mode	10	-0.0259286	0.0697143	0.718553	-0.162569	0.110711	0.974405	0.849958	1.11707					1
1471	Cathepsin E	Spinal canal stenosis	Weighted mode	10	-0.0722621	0.0445109	0.138937	-0.159504	0.0149793	0.930287	0.852567	1.01509					1
1472	Cathepsin E	Spinal canal stenosis	Maximum likelihood	10	-0.0382631	0.032203	0.23476	-0.101381	0.0248547	0.96246	0.903589	1.02517					0.908418
1473	Cathepsin H	Spinal canal stenosis	Inverse variance weighted	11	0.00508927	0.0219122	0.816338	-0.0378586	0.0480371	1.0051	0.962849	1.04921	126.485	0.222241	0.948515	0.365	0.981812
1474	Cathepsin H	Spinal canal stenosis	MR Egger	11	0.00653564	0.0317458	0.841471	-0.0556861	0.0687574	1.00656	0.945836	1.07118		0.161736			0.973466
1475	Cathepsin H	Spinal canal stenosis	Weighted median	11	-0.00440599	0.0211672	0.835111	-0.0458937	0.0370818	0.995604	0.955143	1.03778					0.978904
1476	Cathepsin H	Spinal canal stenosis	Simple mode	11	0.0634377	0.0691944	0.380824	-0.0721834	0.199059	1.06549	0.93036	1.22025					1
1477	Cathepsin H	Spinal canal stenosis	Weighted mode	11	-0.00503749	0.0227802	0.829438	-0.0496868	0.0396118	0.994975	0.951527	1.04041					1
1478	Cathepsin H	Spinal canal stenosis	Maximum likelihood	11	0.00518213	0.0192851	0.788152	-0.0326168	0.042981	1.0052	0.967909	1.04392					0.981056
1479	Cathepsin O	Spinal canal stenosis	Inverse variance weighted	12	-0.00317002	0.0388989	0.935049	-0.0794119	0.0730718	0.996835	0.923659	1.07581	23.2138	0.691671	0.895961	0.693	0.962074
1480	Cathepsin O	Spinal canal stenosis	MR Egger	12	0.0076857	0.0897973	0.933482	-0.168317	0.183688	1.00772	0.845086	1.20164		0.607176			0.995339
1481	Cathepsin O	Spinal canal stenosis	Weighted median	12	-0.023191	0.0517708	0.654186	-0.124662	0.0782798	0.977076	0.882795	1.08143					1
1482	Cathepsin O	Spinal canal stenosis	Simple mode	12	-0.0415645	0.0791594	0.609952	-0.196717	0.113588	0.959287	0.821423	1.12029					1
1483	Cathepsin O	Spinal canal stenosis	Weighted mode	12	-0.0557042	0.0729246	0.461021	-0.198637	0.0872281	0.945819	0.819848	1.09115					1
1484	Cathepsin O	Spinal canal stenosis	Maximum likelihood	12	-0.00323481	0.0394391	0.93463	-0.0805354	0.0740657	0.99677	0.922622	1.07688					0.961643
1485	Cathepsin S	Spinal canal stenosis	Inverse variance weighted	24	-0.0386137	0.0240313	0.108097	-0.085715	0.00848773	0.962122	0.917856	1.00852	39.7152	0.478136	0.983876	0.531	0.962064
1486	Cathepsin S	Spinal canal stenosis	MR Egger	24	-0.0379133	0.042072	0.377267	-0.120374	0.0445478	0.962796	0.886589	1.04555		0.418601			0.99666
1487	Cathepsin S	Spinal canal stenosis	Weighted median	24	-0.0285324	0.0359298	0.427127	-0.0989547	0.0418899	0.971871	0.905784	1.04278					0.945019
1488	Cathepsin S	Spinal canal stenosis	Simple mode	24	-0.0335151	0.0611496	0.588915	-0.153368	0.0863381	0.96704	0.857814	1.09017					1
1489	Cathepsin S	Spinal canal stenosis	Weighted mode	24	-0.0269569	0.0343996	0.441248	-0.0943802	0.0404664	0.973403	0.909937	1.0413					1
1490	Cathepsin S	Spinal canal stenosis	Maximum likelihood	24	-0.0394396	0.0244166	0.10625	-0.087296	0.00841687	0.961328	0.916406	1.00845					0.7565
1491	Cathepsin L2	Spinal canal stenosis	Inverse variance weighted	11	-0.0109482	0.0436555	0.80198	-0.0965129	0.0746166	0.989112	0.907998	1.07747	24.6843	0.876563	0.335965	0.874	0.984499
1492	Cathepsin L2	Spinal canal stenosis	MR Egger	11	0.101523	0.118953	0.415533	-0.131624	0.33467	1.10686	0.876671	1.39748		0.899241			0.919366
1493	Cathepsin L2	Spinal canal stenosis	Weighted median	11	-0.0374721	0.0569679	0.510682	-0.149129	0.074185	0.963221	0.861458	1.07701					0.982508
1494	Cathepsin L2	Spinal canal stenosis	Simple mode	11	-0.0657154	0.0889103	0.476825	-0.23998	0.108549	0.936397	0.786644	1.11466					1
1495	Cathepsin L2	Spinal canal stenosis	Weighted mode	11	-0.049134	0.0745183	0.524561	-0.19519	0.0969219	0.952054	0.822678	1.10177					1
1496	Cathepsin L2	Spinal canal stenosis	Maximum likelihood	11	-0.0109674	0.0439929	0.803129	-0.0971936	0.0752587	0.989092	0.90738	1.07816					0.965925
1497	Cathepsin Z	Spinal canal stenosis	Inverse variance weighted	13	0.0248818	0.0353332	0.481306	-0.0443713	0.0941349	1.02519	0.956599	1.09871	53.4584	0.0687119	0.11654	0.118	0.996191
1498	Cathepsin Z	Spinal canal stenosis	MR Egger	13	-0.0446068	0.052362	0.412436	-0.147236	0.0580226	0.956373	0.86309	1.05974		0.150349			0.948067
1499	Cathepsin Z	Spinal canal stenosis	Weighted median	13	0.0220141	0.0348256	0.527306	-0.0462441	0.0902723	1.02226	0.954809	1.09447					0.972221
1500	Cathepsin Z	Spinal canal stenosis	Simple mode	13	0.019359	0.059348	0.749896	-0.0969631	0.135681	1.01955	0.907589	1.14532					1
1501	Cathepsin Z	Spinal canal stenosis	Weighted mode	13	0.019359	0.0350237	0.59059	-0.0492875	0.0880055	1.01955	0.951907	1.09199					1
1502	Cathepsin Z	Spinal canal stenosis	Maximum likelihood	13	0.0258786	0.0278817	0.353324	-0.0287694	0.0805267	1.02622	0.971641	1.08386					0.873497
1503	Cathepsin B	Scapulohumeral periarthritis	Inverse variance weighted	17	-0.00830277	0.0214688	0.698951	-0.0503816	0.0337761	0.991732	0.950866	1.03435	35.5021	0.524458	0.113949	0.486	0.987407
1504	Cathepsin B	Scapulohumeral periarthritis	MR Egger	17	-0.0834793	0.0496669	0.113503	-0.180826	0.0138678	0.91991	0.83458	1.01396		0.664975			1
1505	Cathepsin B	Scapulohumeral periarthritis	Weighted median	17	-0.0250397	0.0294825	0.39571	-0.0828254	0.032746	0.975271	0.920512	1.03329					0.959462
1506	Cathepsin B	Scapulohumeral periarthritis	Simple mode	17	0.0120229	0.0560376	0.832828	-0.0978107	0.121857	1.0121	0.906821	1.12959					1
1507	Cathepsin B	Scapulohumeral periarthritis	Weighted mode	17	-0.0401353	0.0322464	0.231186	-0.103338	0.0230677	0.960659	0.901822	1.02334					1
1508	Cathepsin B	Scapulohumeral periarthritis	Maximum likelihood	17	-0.00830471	0.0217637	0.702769	-0.0509616	0.0343522	0.99173	0.950315	1.03495					0.962253
1509	Cathepsin F	Scapulohumeral periarthritis	Inverse variance weighted	12	-0.0076439	0.0242091	0.752196	-0.0550937	0.0398059	0.992385	0.946396	1.04061	36.6058	0.657732	0.60393	0.651	0.991784
1510	Cathepsin F	Scapulohumeral periarthritis	MR Egger	12	0.0213512	0.0593006	0.726297	-0.094878	0.13758	1.02158	0.909484	1.14749		0.597192			0.966576
1511	Cathepsin F	Scapulohumeral periarthritis	Weighted median	12	-0.00736202	0.0333681	0.82538	-0.0727636	0.0580395	0.992665	0.929821	1.05976					0.993825
1512	Cathepsin F	Scapulohumeral periarthritis	Simple mode	12	-0.0125066	0.0547255	0.823425	-0.119769	0.0947554	0.987571	0.887126	1.09939					1
1513	Cathepsin F	Scapulohumeral periarthritis	Weighted mode	12	0.0127156	0.0423118	0.769383	-0.0702155	0.0956467	1.0128	0.932193	1.10037					1
1514	Cathepsin F	Scapulohumeral periarthritis	Maximum likelihood	12	-0.00791186	0.0244419	0.746165	-0.055818	0.0399943	0.992119	0.945711	1.0408					0.962444
1515	Cathepsin G	Scapulohumeral periarthritis	Inverse variance weighted	9	0.0621701	0.0457735	0.174396	-0.0275459	0.151886	1.06414	0.97283	1.16403	22.5977	0.132913	0.432152	0.157	1
1516	Cathepsin G	Scapulohumeral periarthritis	MR Egger	9	0.13939	0.103752	0.221029	-0.063963	0.342743	1.14957	0.93804	1.40881		0.125632			1
1517	Cathepsin G	Scapulohumeral periarthritis	Weighted median	9	0.0602658	0.0498402	0.226594	-0.037421	0.157953	1.06212	0.96327	1.17111					1
1518	Cathepsin G	Scapulohumeral periarthritis	Simple mode	9	0.0656937	0.0806491	0.438896	-0.0923785	0.223766	1.0679	0.91176	1.25078					1
1519	Cathepsin G	Scapulohumeral periarthritis	Weighted mode	9	0.0643115	0.0721983	0.399053	-0.0771971	0.20582	1.06642	0.925707	1.22853					1
1520	Cathepsin G	Scapulohumeral periarthritis	Maximum likelihood	9	0.0649637	0.0382705	0.0896047	-0.0100465	0.139974	1.06712	0.990004	1.15024					0.797482
1521	Cathepsin E	Scapulohumeral periarthritis	Inverse variance weighted	9	-0.0309655	0.0462102	0.502793	-0.121537	0.0596064	0.969509	0.885558	1.06142	21.9099	0.0511382	0.391937	0.07	0.962335
1522	Cathepsin E	Scapulohumeral periarthritis	MR Egger	9	0.0374048	0.0883022	0.684569	-0.135668	0.210477	1.03811	0.873133	1.23427		0.0548742			0.954085
1523	Cathepsin E	Scapulohumeral periarthritis	Weighted median	9	0.011649	0.0487167	0.811014	-0.0838357	0.107134	1.01172	0.919582	1.11308					1
1524	Cathepsin E	Scapulohumeral periarthritis	Simple mode	9	0.0261481	0.0783182	0.747061	-0.127355	0.179652	1.02649	0.880421	1.1968					1
1525	Cathepsin E	Scapulohumeral periarthritis	Weighted mode	9	0.0291241	0.0681633	0.680451	-0.104476	0.162724	1.02955	0.900796	1.17671					1
1526	Cathepsin E	Scapulohumeral periarthritis	Maximum likelihood	9	-0.0336426	0.0351119	0.337985	-0.102462	0.0351767	0.966917	0.902612	1.0358					0.89793
1527	Cathepsin H	Scapulohumeral periarthritis	Inverse variance weighted	8	-0.0190924	0.0160239	0.233461	-0.0504992	0.0123145	0.981089	0.950755	1.01239	165.683	0.403362	0.309371	0.574	0.989428
1528	Cathepsin H	Scapulohumeral periarthritis	MR Egger	8	-0.0354305	0.0215646	0.15149	-0.0776972	0.00683614	0.96519	0.925245	1.00686		0.421629			1
1529	Cathepsin H	Scapulohumeral periarthritis	Weighted median	8	-0.01721	0.0174882	0.325072	-0.0514869	0.0170669	0.982937	0.949816	1.01721					0.94324
1530	Cathepsin H	Scapulohumeral periarthritis	Simple mode	8	0.0324028	0.0553386	0.576568	-0.0760608	0.140866	1.03293	0.92676	1.15127					1
1531	Cathepsin H	Scapulohumeral periarthritis	Weighted mode	8	-0.0161502	0.0177303	0.392644	-0.0509015	0.0186012	0.98398	0.950372	1.01878					1
1532	Cathepsin H	Scapulohumeral periarthritis	Maximum likelihood	8	-0.0192125	0.0158092	0.224262	-0.0501986	0.0117735	0.980971	0.951041	1.01184					0.92834
1533	Cathepsin O	Scapulohumeral periarthritis	Inverse variance weighted	11	-0.0119626	0.0406997	0.768816	-0.0917339	0.0678087	0.988109	0.912348	1.07016	22.8192	0.085596	0.579644	0.097	0.991662
1534	Cathepsin O	Scapulohumeral periarthritis	MR Egger	11	0.0392998	0.0986647	0.699681	-0.154083	0.232683	1.04008	0.857201	1.26198		0.0681712			0.967528
1535	Cathepsin O	Scapulohumeral periarthritis	Weighted median	11	0.0218634	0.0442661	0.62137	-0.0648981	0.108625	1.0221	0.937163	1.11474					1
1536	Cathepsin O	Scapulohumeral periarthritis	Simple mode	11	0.0611493	0.0744218	0.430425	-0.0847173	0.207016	1.06306	0.918772	1.23					1
1537	Cathepsin O	Scapulohumeral periarthritis	Weighted mode	11	0.059448	0.0697165	0.413777	-0.0771964	0.196092	1.06125	0.925708	1.21664					1
1538	Cathepsin O	Scapulohumeral periarthritis	Maximum likelihood	11	-0.0127329	0.0328012	0.69788	-0.0770232	0.0515574	0.987348	0.925868	1.05291					0.962966
1539	Cathepsin S	Scapulohumeral periarthritis	Inverse variance weighted	18	0.00163141	0.0186043	0.930123	-0.0348331	0.0380959	1.00163	0.965767	1.03883	45.5307	0.847932	0.14172	0.778	0.968198
1540	Cathepsin S	Scapulohumeral periarthritis	MR Egger	18	-0.0365029	0.0308994	0.254727	-0.0970658	0.0240599	0.964155	0.907496	1.02435		0.922413			1
1541	Cathepsin S	Scapulohumeral periarthritis	Weighted median	18	-0.0261823	0.0251129	0.297142	-0.0754035	0.023039	0.974158	0.927369	1.02331					0.992341
1542	Cathepsin S	Scapulohumeral periarthritis	Simple mode	18	0.0733952	0.0575798	0.219574	-0.0394612	0.186252	1.07616	0.961307	1.20473					1
1543	Cathepsin S	Scapulohumeral periarthritis	Weighted mode	18	-0.0268283	0.0267882	0.330629	-0.0793331	0.0256765	0.973528	0.923732	1.02601					1
1544	Cathepsin S	Scapulohumeral periarthritis	Maximum likelihood	18	0.00164857	0.0187444	0.929917	-0.0350905	0.0383877	1.00165	0.965518	1.03913					0.967983
1545	Cathepsin L2	Scapulohumeral periarthritis	Inverse variance weighted	8	0.00703222	0.0512099	0.890777	-0.0933392	0.107404	1.00706	0.910884	1.11338	22.7502	0.0965062	0.772908	0.125	0.978755
1546	Cathepsin L2	Scapulohumeral periarthritis	MR Egger	8	-0.0278626	0.127953	0.834836	-0.278651	0.222926	0.972522	0.756804	1.24973		0.0632286			0.978582
1547	Cathepsin L2	Scapulohumeral periarthritis	Weighted median	8	-0.0195423	0.0574298	0.733645	-0.132105	0.0930201	0.980647	0.876249	1.09748					1
1548	Cathepsin L2	Scapulohumeral periarthritis	Simple mode	8	-0.0647291	0.0918543	0.503766	-0.244764	0.115305	0.937321	0.78289	1.12222					1
1549	Cathepsin L2	Scapulohumeral periarthritis	Weighted mode	8	-0.0595697	0.0891178	0.525275	-0.234241	0.115101	0.94217	0.791171	1.12199					1
1550	Cathepsin L2	Scapulohumeral periarthritis	Maximum likelihood	8	0.00753716	0.0403058	0.851661	-0.0714623	0.0865366	1.00757	0.931031	1.09039					0.947473
1551	Cathepsin Z	Scapulohumeral periarthritis	Inverse variance weighted	12	0.00416775	0.0248808	0.86697	-0.0445986	0.0529341	1.00418	0.956381	1.05436	55.9291	0.146286	0.428787	0.196	0.976713
1552	Cathepsin Z	Scapulohumeral periarthritis	MR Egger	12	0.0292369	0.0395181	0.476409	-0.0482185	0.106692	1.02967	0.952926	1.11259		0.137512			0.936938
1553	Cathepsin Z	Scapulohumeral periarthritis	Weighted median	12	0.0268388	0.0283028	0.34299	-0.0286347	0.0823123	1.0272	0.971771	1.08579					0.948583
1554	Cathepsin Z	Scapulohumeral periarthritis	Simple mode	12	0.0245885	0.0472478	0.613087	-0.0680171	0.117194	1.02489	0.934244	1.12434					1
1555	Cathepsin Z	Scapulohumeral periarthritis	Weighted mode	12	0.0174281	0.0269626	0.531288	-0.0354186	0.0702747	1.01758	0.965201	1.0728					1
1556	Cathepsin Z	Scapulohumeral periarthritis	Maximum likelihood	12	0.00430831	0.0209985	0.837438	-0.0368488	0.0454654	1.00432	0.963822	1.04651					0.949451
1557	Cathepsin B	Muscle nerve junction and muscle diseases	Inverse variance weighted	17	-0.229681	0.132385	0.0827492	-0.489156	0.0297929	0.794787	0.613144	1.03024	35.5021	0.0424092	0.790947	0.058	1
1558	Cathepsin B	Muscle nerve junction and muscle diseases	MR Egger	17	-0.307133	0.317769	0.349106	-0.92996	0.315694	0.735553	0.39457	1.37121		0.0305166			0.965496
1559	Cathepsin B	Muscle nerve junction and muscle diseases	Weighted median	17	-0.175542	0.152966	0.251137	-0.475355	0.124271	0.839002	0.621664	1.13232					1
1560	Cathepsin B	Muscle nerve junction and muscle diseases	Simple mode	17	-0.568816	0.300105	0.0762539	-1.15702	0.0193896	0.566195	0.314421	1.01958					1
1561	Cathepsin B	Muscle nerve junction and muscle diseases	Weighted mode	17	-0.169842	0.175523	0.347625	-0.513867	0.174182	0.843798	0.598178	1.19027					1
1562	Cathepsin B	Muscle nerve junction and muscle diseases	Maximum likelihood	17	-0.22896	0.104833	0.0289585	-0.434431	-0.0234878	0.795361	0.647633	0.976786					0.572735
1563	Cathepsin F	Muscle nerve junction and muscle diseases	Inverse variance weighted	12	-0.0275276	0.105894	0.794898	-0.235079	0.180024	0.972848	0.790508	1.19725	36.6058	0.512685	0.69768	0.533	0.996422
1564	Cathepsin F	Muscle nerve junction and muscle diseases	MR Egger	12	-0.11724	0.248188	0.646792	-0.603689	0.369209	0.889371	0.546791	1.44659		0.437222			0.970188
1565	Cathepsin F	Muscle nerve junction and muscle diseases	Weighted median	12	0.0190822	0.144011	0.894584	-0.263179	0.301344	1.01927	0.768604	1.35167					0.977416
1566	Cathepsin F	Muscle nerve junction and muscle diseases	Simple mode	12	0.135291	0.222343	0.555227	-0.300501	0.571083	1.14487	0.740447	1.77018					1
1567	Cathepsin F	Muscle nerve junction and muscle diseases	Weighted mode	12	0.0936993	0.183613	0.61992	-0.266183	0.453582	1.09823	0.766299	1.57394					1
1568	Cathepsin F	Muscle nerve junction and muscle diseases	Maximum likelihood	12	-0.0281199	0.107206	0.793091	-0.238243	0.182003	0.972272	0.788011	1.19962					0.980349
1569	Cathepsin G	Muscle nerve junction and muscle diseases	Inverse variance weighted	13	-0.114232	0.174541	0.512807	-0.456332	0.227868	0.892051	0.633604	1.25592	22.9823	0.0121363	0.0783573	0.023	0.971061
1570	Cathepsin G	Muscle nerve junction and muscle diseases	MR Egger	13	-0.621953	0.305297	0.0664225	-1.22033	-0.0235711	0.536895	0.295132	0.976705		0.0595497			1
1571	Cathepsin G	Muscle nerve junction and muscle diseases	Weighted median	13	-0.29747	0.189437	0.116349	-0.668766	0.0738269	0.742695	0.51234	1.07662					1
1572	Cathepsin G	Muscle nerve junction and muscle diseases	Simple mode	13	-0.210078	0.308932	0.509404	-0.815585	0.39543	0.810521	0.44238	1.48502					1
1573	Cathepsin G	Muscle nerve junction and muscle diseases	Weighted mode	13	-0.332913	0.190614	0.106241	-0.706518	0.0406912	0.716832	0.493359	1.04153					1
1574	Cathepsin G	Muscle nerve junction and muscle diseases	Maximum likelihood	13	-0.110746	0.123315	0.369149	-0.352444	0.130953	0.895167	0.702968	1.13991					0.876115
1575	Cathepsin E	Muscle nerve junction and muscle diseases	Inverse variance weighted	10	-0.114175	0.11383	0.315846	-0.337281	0.108932	0.892102	0.713708	1.11509	21.973	0.404932	0.164871	0.455	0.986326
1576	Cathepsin E	Muscle nerve junction and muscle diseases	MR Egger	10	-0.343742	0.187121	0.10352	-0.710499	0.0230159	0.709112	0.491399	1.02328		0.534382			1
1577	Cathepsin E	Muscle nerve junction and muscle diseases	Weighted median	10	-0.234221	0.15413	0.128603	-0.536316	0.0678733	0.791187	0.584899	1.07023					1
1578	Cathepsin E	Muscle nerve junction and muscle diseases	Simple mode	10	-0.320086	0.231132	0.199458	-0.773105	0.132933	0.726087	0.461578	1.14217					1
1579	Cathepsin E	Muscle nerve junction and muscle diseases	Weighted mode	10	-0.283799	0.171696	0.132738	-0.620323	0.0527248	0.752918	0.537771	1.05414					1
1580	Cathepsin E	Muscle nerve junction and muscle diseases	Maximum likelihood	10	-0.117843	0.112669	0.295597	-0.338673	0.102988	0.888836	0.712715	1.10848					0.862562
1581	Cathepsin H	Muscle nerve junction and muscle diseases	Inverse variance weighted	11	-0.037753	0.0665408	0.570466	-0.168173	0.092667	0.962951	0.845208	1.0971	126.485	0.83705	0.521659	0.88	0.976374
1582	Cathepsin H	Muscle nerve junction and muscle diseases	MR Egger	11	0.00408942	0.091466	0.965315	-0.175184	0.183363	1.0041	0.839303	1.20125		0.808331			1
1583	Cathepsin H	Muscle nerve junction and muscle diseases	Weighted median	11	-0.0190401	0.070374	0.786733	-0.156973	0.118893	0.98114	0.854727	1.12625					1
1584	Cathepsin H	Muscle nerve junction and muscle diseases	Simple mode	11	-0.162929	0.172663	0.367601	-0.501348	0.17549	0.849652	0.605714	1.19183					1
1585	Cathepsin H	Muscle nerve junction and muscle diseases	Weighted mode	11	-0.0199875	0.070892	0.783736	-0.158936	0.118961	0.980211	0.853051	1.12633					1
1586	Cathepsin H	Muscle nerve junction and muscle diseases	Maximum likelihood	11	-0.0379087	0.0666782	0.569673	-0.168598	0.0927805	0.962801	0.844849	1.09722					0.905374
1587	Cathepsin O	Muscle nerve junction and muscle diseases	Inverse variance weighted	12	0.0412759	0.146145	0.777613	-0.245168	0.32772	1.04214	0.782573	1.3878	23.2138	0.3142	0.0671267	0.33	0.981667
1588	Cathepsin O	Muscle nerve junction and muscle diseases	MR Egger	12	-0.54232	0.315108	0.115974	-1.15993	0.0752912	0.581398	0.313508	1.0782		0.582864			1
1589	Cathepsin O	Muscle nerve junction and muscle diseases	Weighted median	12	0.0320938	0.196657	0.870363	-0.353354	0.417542	1.03261	0.702328	1.51822					1
1590	Cathepsin O	Muscle nerve junction and muscle diseases	Simple mode	12	-0.017484	0.341253	0.960057	-0.68634	0.651372	0.982668	0.503415	1.91817					1
1591	Cathepsin O	Muscle nerve junction and muscle diseases	Weighted mode	12	-0.017484	0.304299	0.955212	-0.61391	0.578942	0.982668	0.54123	1.78415					1
1592	Cathepsin O	Muscle nerve junction and muscle diseases	Maximum likelihood	12	0.043886	0.139459	0.752998	-0.229453	0.317225	1.04486	0.794969	1.37331					0.964271
1593	Cathepsin S	Muscle nerve junction and muscle diseases	Inverse variance weighted	24	0.074964	0.0841488	0.373009	-0.0899676	0.239896	1.07785	0.913961	1.27112	39.7152	0.467926	0.810569	0.48	1
1594	Cathepsin S	Muscle nerve junction and muscle diseases	MR Egger	24	0.104304	0.148228	0.489017	-0.186223	0.394832	1.10994	0.830088	1.48413		0.412137			0.93071
1595	Cathepsin S	Muscle nerve junction and muscle diseases	Weighted median	24	0.0517608	0.127005	0.683604	-0.197169	0.30069	1.05312	0.821052	1.35079					1
1596	Cathepsin S	Muscle nerve junction and muscle diseases	Simple mode	24	0.148171	0.248364	0.556611	-0.338624	0.634965	1.15971	0.712751	1.88696					1
1597	Cathepsin S	Muscle nerve junction and muscle diseases	Weighted mode	24	0.0691738	0.130794	0.601958	-0.187182	0.32553	1.07162	0.829293	1.38476					1
1598	Cathepsin S	Muscle nerve junction and muscle diseases	Maximum likelihood	24	0.0769531	0.085448	0.36781	-0.090525	0.244431	1.07999	0.913451	1.27689					0.884731
1599	Cathepsin L2	Muscle nerve junction and muscle diseases	Inverse variance weighted	11	-0.137656	0.152904	0.36797	-0.437348	0.162035	0.871398	0.645747	1.1759	24.6843	0.857598	0.608578	0.859	1
1600	Cathepsin L2	Muscle nerve junction and muscle diseases	MR Egger	11	-0.343064	0.416266	0.431156	-1.15895	0.472818	0.709593	0.313817	1.60451		0.817505			0.919452
1601	Cathepsin L2	Muscle nerve junction and muscle diseases	Weighted median	11	-0.126066	0.203353	0.535298	-0.524638	0.272505	0.881556	0.59177	1.31325					0.97678
1602	Cathepsin L2	Muscle nerve junction and muscle diseases	Simple mode	11	-0.363473	0.296855	0.248857	-0.945308	0.218362	0.695257	0.38856	1.24404					1
1603	Cathepsin L2	Muscle nerve junction and muscle diseases	Weighted mode	11	-0.206851	0.259103	0.443222	-0.714693	0.30099	0.813141	0.489342	1.3512					1
1604	Cathepsin L2	Muscle nerve junction and muscle diseases	Maximum likelihood	11	-0.137878	0.154115	0.370976	-0.439944	0.164187	0.871205	0.644073	1.17843					0.868865
1605	Cathepsin Z	Muscle nerve junction and muscle diseases	Inverse variance weighted	13	-0.0564397	0.0951555	0.553094	-0.242945	0.130065	0.945124	0.784315	1.1389	53.4584	0.443163	0.0269535	0.301	0.974759
1606	Cathepsin Z	Muscle nerve junction and muscle diseases	MR Egger	13	0.241021	0.15043	0.137413	-0.0538223	0.535864	1.27255	0.9476	1.70892		0.903138			1
1607	Cathepsin Z	Muscle nerve junction and muscle diseases	Weighted median	13	-0.0532087	0.140488	0.704879	-0.328565	0.222147	0.948182	0.719956	1.24876					1
1608	Cathepsin Z	Muscle nerve junction and muscle diseases	Simple mode	13	-0.350785	0.267657	0.214531	-0.875393	0.173823	0.704135	0.416698	1.18985					1
1609	Cathepsin Z	Muscle nerve junction and muscle diseases	Weighted mode	13	-0.0228213	0.182907	0.902771	-0.381319	0.335676	0.977437	0.68296	1.39889					1
1610	Cathepsin Z	Muscle nerve junction and muscle diseases	Maximum likelihood	13	-0.0570238	0.0958424	0.55186	-0.244875	0.130827	0.944572	0.782802	1.13977					0.909547
1611	Cathepsin B	Muscle nerve junction and muscle diseases	Inverse variance weighted	17	0.0579733	0.0757644	0.444165	-0.0905249	0.206471	1.05969	0.913452	1.22933	35.5021	0.0824929	0.144084	0.101	1
1612	Cathepsin B	Muscle nerve junction and muscle diseases	MR Egger	17	0.293761	0.169381	0.103358	-0.0382261	0.625747	1.34146	0.962495	1.86964		0.136645			1
1613	Cathepsin B	Muscle nerve junction and muscle diseases	Weighted median	17	0.0657366	0.0873629	0.451778	-0.105495	0.236968	1.06795	0.899879	1.2674					0.940761
1614	Cathepsin B	Muscle nerve junction and muscle diseases	Simple mode	17	0.0246492	0.121329	0.841571	-0.213156	0.262455	1.02496	0.80803	1.30012					1
1615	Cathepsin B	Muscle nerve junction and muscle diseases	Weighted mode	17	0.0500566	0.0928432	0.597205	-0.131916	0.232029	1.05133	0.876415	1.26116					1
1616	Cathepsin B	Muscle nerve junction and muscle diseases	Maximum likelihood	17	0.0609661	0.0631684	0.334477	-0.062844	0.184776	1.06286	0.93909	1.20295					0.902073
1617	Cathepsin F	Muscle nerve junction and muscle diseases	Inverse variance weighted	12	-0.0162988	0.0632894	0.796771	-0.140346	0.107748	0.983833	0.869057	1.11377	36.6058	0.442355	0.632726	0.483	0.991785
1618	Cathepsin F	Muscle nerve junction and muscle diseases	MR Egger	12	0.0520941	0.153476	0.741307	-0.248718	0.352906	1.05347	0.7798	1.4232		0.37735			0.971936
1619	Cathepsin F	Muscle nerve junction and muscle diseases	Weighted median	12	0.0324881	0.0900233	0.718185	-0.143958	0.208934	1.03302	0.865924	1.23236					1
1620	Cathepsin F	Muscle nerve junction and muscle diseases	Simple mode	12	0.021752	0.14233	0.881302	-0.257215	0.300719	1.02199	0.773202	1.35083					1
1621	Cathepsin F	Muscle nerve junction and muscle diseases	Weighted mode	12	0.0297635	0.119602	0.808058	-0.204656	0.264183	1.03021	0.814928	1.30237					1
1622	Cathepsin F	Muscle nerve junction and muscle diseases	Maximum likelihood	12	-0.0162495	0.06401	0.799605	-0.141709	0.10921	0.983882	0.867874	1.1154					0.981584
1623	Cathepsin G	Muscle nerve junction and muscle diseases	Inverse variance weighted	13	0.0750915	0.0713949	0.292902	-0.0648425	0.215026	1.07798	0.937215	1.23989	22.9823	0.937615	0.827471	0.921	0.983709
1624	Cathepsin G	Muscle nerve junction and muscle diseases	MR Egger	13	0.101562	0.138429	0.47849	-0.169758	0.372883	1.1069	0.843869	1.45191		0.905317			0.93069
1625	Cathepsin G	Muscle nerve junction and muscle diseases	Weighted median	13	-0.0261853	0.0991954	0.791797	-0.220608	0.168238	0.974155	0.802031	1.18322					1
1626	Cathepsin G	Muscle nerve junction and muscle diseases	Simple mode	13	0.00894372	0.154392	0.954759	-0.293665	0.311553	1.00898	0.745526	1.36554					1
1627	Cathepsin G	Muscle nerve junction and muscle diseases	Weighted mode	13	-0.0215437	0.106715	0.843392	-0.230705	0.187617	0.978687	0.793974	1.20637					1
1628	Cathepsin G	Muscle nerve junction and muscle diseases	Maximum likelihood	13	0.0773799	0.0734145	0.291877	-0.0665126	0.221272	1.08045	0.935651	1.24766					0.880577
1629	Cathepsin E	Muscle nerve junction and muscle diseases	Inverse variance weighted	10	-0.0425559	0.0822607	0.604926	-0.203787	0.118675	0.958337	0.815636	1.126	21.973	0.132021	0.62257	0.138	0.952893
1630	Cathepsin E	Muscle nerve junction and muscle diseases	MR Egger	10	-0.101661	0.14389	0.499923	-0.383686	0.180364	0.903336	0.681345	1.19765		0.101915			0.931436
1631	Cathepsin E	Muscle nerve junction and muscle diseases	Weighted median	10	-0.108579	0.0983224	0.269458	-0.30129	0.0841334	0.897108	0.739863	1.08777					1
1632	Cathepsin E	Muscle nerve junction and muscle diseases	Simple mode	10	-0.109288	0.165977	0.526728	-0.434603	0.216026	0.896472	0.647522	1.24113					1
1633	Cathepsin E	Muscle nerve junction and muscle diseases	Weighted mode	10	-0.180354	0.138141	0.224082	-0.451111	0.090403	0.834975	0.63692	1.09462					1
1634	Cathepsin E	Muscle nerve junction and muscle diseases	Maximum likelihood	10	-0.043903	0.0683046	0.520384	-0.17778	0.0899739	0.957047	0.837127	1.09415					0.890657
1635	Cathepsin H	Muscle nerve junction and muscle diseases	Inverse variance weighted	11	0.0205301	0.0398342	0.606281	-0.057545	0.0986052	1.02074	0.944079	1.10363	126.485	0.954908	0.579441	0.966	0.94665
1636	Cathepsin H	Muscle nerve junction and muscle diseases	MR Egger	11	-0.0010561	0.054741	0.985029	-0.108348	0.106236	0.998944	0.897315	1.11208		0.941452			1
1637	Cathepsin H	Muscle nerve junction and muscle diseases	Weighted median	11	0.0125561	0.0436222	0.773472	-0.0729435	0.0980557	1.01264	0.929653	1.10302					0.999303
1638	Cathepsin H	Muscle nerve junction and muscle diseases	Simple mode	11	-0.00122383	0.100377	0.990512	-0.197963	0.195516	0.998777	0.8204	1.21594					0.99614
1639	Cathepsin H	Muscle nerve junction and muscle diseases	Weighted mode	11	0.0117685	0.0450431	0.799185	-0.076516	0.100053	1.01184	0.926338	1.10523					1
1640	Cathepsin H	Muscle nerve junction and muscle diseases	Maximum likelihood	11	0.0206266	0.0398964	0.605153	-0.0575703	0.0988235	1.02084	0.944056	1.10387					0.92066
1641	Cathepsin O	Muscle nerve junction and muscle diseases	Inverse variance weighted	12	-0.0284814	0.0856761	0.739564	-0.196407	0.139444	0.97192	0.821678	1.14963	23.2138	0.340855	0.623501	0.4	0.989792
1642	Cathepsin O	Muscle nerve junction and muscle diseases	MR Egger	12	0.0648823	0.204582	0.757655	-0.336097	0.465862	1.06703	0.714553	1.59339		0.284966			0.971774
1643	Cathepsin O	Muscle nerve junction and muscle diseases	Weighted median	12	-0.0591938	0.113024	0.600467	-0.28072	0.162333	0.942524	0.75524	1.17625					1
1644	Cathepsin O	Muscle nerve junction and muscle diseases	Simple mode	12	0.0526259	0.167209	0.758856	-0.275104	0.380356	1.05404	0.759493	1.46281					1
1645	Cathepsin O	Muscle nerve junction and muscle diseases	Weighted mode	12	0.0228674	0.152593	0.883588	-0.276214	0.321949	1.02313	0.75865	1.37981					1
1646	Cathepsin O	Muscle nerve junction and muscle diseases	Maximum likelihood	12	-0.0284793	0.0822222	0.729065	-0.189635	0.132676	0.971922	0.827261	1.14188					0.961286
1647	Cathepsin S	Muscle nerve junction and muscle diseases	Inverse variance weighted	24	0.0424815	0.0502261	0.397661	-0.0559617	0.140925	1.0434	0.945575	1.15134	39.7152	0.8742	0.892651	0.889	1
1648	Cathepsin S	Muscle nerve junction and muscle diseases	MR Egger	24	0.0328201	0.0867805	0.708909	-0.13727	0.20291	1.03336	0.871735	1.22496		0.83886			0.965207
1649	Cathepsin S	Muscle nerve junction and muscle diseases	Weighted median	24	0.0629581	0.0753405	0.403353	-0.0847093	0.210625	1.06498	0.918779	1.23445					0.927189
1650	Cathepsin S	Muscle nerve junction and muscle diseases	Simple mode	24	0.140691	0.125231	0.272838	-0.104762	0.386144	1.15107	0.900538	1.4713					1
1651	Cathepsin S	Muscle nerve junction and muscle diseases	Weighted mode	24	0.0633766	0.0783189	0.426686	-0.0901285	0.216882	1.06543	0.913814	1.2422					1
1652	Cathepsin S	Muscle nerve junction and muscle diseases	Maximum likelihood	24	0.0433917	0.0506673	0.391774	-0.0559161	0.1427	1.04435	0.945618	1.15338					0.871696
1653	Cathepsin L2	Muscle nerve junction and muscle diseases	Inverse variance weighted	11	0.0991876	0.0913122	0.27737	-0.0797843	0.278159	1.10427	0.923315	1.3207	24.6843	0.810539	0.732667	0.802	0.987437
1654	Cathepsin L2	Muscle nerve junction and muscle diseases	MR Egger	11	0.0177723	0.248435	0.944535	-0.469161	0.504706	1.01793	0.625527	1.6565		0.746724			0.995135
1655	Cathepsin L2	Muscle nerve junction and muscle diseases	Weighted median	11	0.13163	0.122045	0.280792	-0.107577	0.370838	1.14069	0.898007	1.44895					1
1656	Cathepsin L2	Muscle nerve junction and muscle diseases	Simple mode	11	0.163383	0.189229	0.40814	-0.207505	0.534272	1.17749	0.812609	1.70621					1
1657	Cathepsin L2	Muscle nerve junction and muscle diseases	Weighted mode	11	0.139803	0.148103	0.36744	-0.150479	0.430084	1.15005	0.860296	1.53739					1
1658	Cathepsin L2	Muscle nerve junction and muscle diseases	Maximum likelihood	11	0.101249	0.0925195	0.273803	-0.0800898	0.282587	1.10655	0.923033	1.32656					0.886125
1659	Cathepsin Z	Muscle nerve junction and muscle diseases	Inverse variance weighted	13	-0.0476413	0.0645769	0.46067	-0.174212	0.0789295	0.953476	0.840119	1.08213	53.4584	0.2147	0.449318	0.246	1
1660	Cathepsin Z	Muscle nerve junction and muscle diseases	MR Egger	13	-0.110891	0.103965	0.308995	-0.314662	0.0928801	0.895036	0.730036	1.09733		0.197198			0.976643
1661	Cathepsin Z	Muscle nerve junction and muscle diseases	Weighted median	13	-0.0447035	0.0774277	0.563698	-0.196462	0.107055	0.956281	0.821633	1.113					1
1662	Cathepsin Z	Muscle nerve junction and muscle diseases	Simple mode	13	-0.0223121	0.12556	0.861922	-0.268409	0.223785	0.977935	0.764595	1.2508					1
1663	Cathepsin Z	Muscle nerve junction and muscle diseases	Weighted mode	13	-0.0150056	0.0803889	0.855044	-0.172568	0.142557	0.985106	0.841501	1.15322					1
1664	Cathepsin Z	Muscle nerve junction and muscle diseases	Maximum likelihood	13	-0.0481987	0.0576224	0.402898	-0.161139	0.0647412	0.952944	0.851174	1.06688					0.864046
1665	Cathepsin B	Muscle atrophy and atrophy	Inverse variance weighted	17	0.259772	0.278909	0.351655	-0.286891	0.806434	1.29663	0.750594	2.23991	35.5021	0.823125	0.717538	0.838	0.993564
1666	Cathepsin B	Muscle atrophy and atrophy	MR Egger	17	0.476299	0.650207	0.475134	-0.798107	1.75071	1.61011	0.45018	5.75867		0.777698			0.94493
1667	Cathepsin B	Muscle atrophy and atrophy	Weighted median	17	0.49275	0.389952	0.206368	-0.271556	1.25706	1.63681	0.762192	3.51506					1
1668	Cathepsin B	Muscle atrophy and atrophy	Simple mode	17	0.462063	0.645435	0.484374	-0.802989	1.72712	1.58735	0.447988	5.6244					1
1669	Cathepsin B	Muscle atrophy and atrophy	Weighted mode	17	0.539274	0.48404	0.281688	-0.409443	1.48799	1.71476	0.66402	4.42819					1
1670	Cathepsin B	Muscle atrophy and atrophy	Maximum likelihood	17	0.268172	0.282289	0.342117	-0.285114	0.821458	1.30757	0.751928	2.27381					0.895541
1671	Cathepsin F	Muscle atrophy and atrophy	Inverse variance weighted	12	-0.635073	0.285231	0.0259794	-1.19413	-0.0760197	0.529897	0.302969	0.926798	36.6058	0.876886	0.829134	0.861	0.578042
1672	Cathepsin F	Muscle atrophy and atrophy	MR Egger	12	-0.501542	0.666833	0.469309	-1.80853	0.805451	0.605596	0.163894	2.2377		0.823777			0.965904
1673	Cathepsin F	Muscle atrophy and atrophy	Weighted median	12	-0.473518	0.384158	0.21772	-1.22647	0.279431	0.622808	0.293327	1.32238					1
1674	Cathepsin F	Muscle atrophy and atrophy	Simple mode	12	-0.384515	0.6277	0.552609	-1.61481	0.845777	0.680781	0.198929	2.32979					1
1675	Cathepsin F	Muscle atrophy and atrophy	Weighted mode	12	-0.0995117	0.588617	0.868818	-1.2532	1.05418	0.905279	0.285589	2.86961					1
1676	Cathepsin F	Muscle atrophy and atrophy	Maximum likelihood	12	-0.617634	0.289088	0.0326398	-1.18425	-0.0510203	0.539219	0.305977	0.950259					0.528171
1677	Cathepsin G	Muscle atrophy and atrophy	Inverse variance weighted	13	-0.246982	0.322627	0.443953	-0.879331	0.385367	0.781155	0.41506	1.47015	22.9823	0.885544	0.733055	0.921	1
1678	Cathepsin G	Muscle atrophy and atrophy	MR Egger	13	-0.0595821	0.625309	0.925803	-1.28519	1.16602	0.942158	0.276599	3.20921		0.842969			0.99919
1679	Cathepsin G	Muscle atrophy and atrophy	Weighted median	13	-0.148106	0.462125	0.748598	-1.05387	0.757659	0.86234	0.348586	2.13328					1
1680	Cathepsin G	Muscle atrophy and atrophy	Simple mode	13	-0.475859	0.608734	0.449529	-1.66898	0.71726	0.621351	0.188439	2.04881					1
1681	Cathepsin G	Muscle atrophy and atrophy	Weighted mode	13	-0.234258	0.464217	0.622957	-1.14412	0.675608	0.791157	0.318503	1.96523					1
1682	Cathepsin G	Muscle atrophy and atrophy	Maximum likelihood	13	-0.247312	0.326124	0.448248	-0.886515	0.39189	0.780897	0.41209	1.47978					0.886535
1683	Cathepsin E	Muscle atrophy and atrophy	Inverse variance weighted	10	-0.160087	0.296554	0.589318	-0.741333	0.421158	0.85207	0.476478	1.52373	21.973	0.484241	0.933734	0.52	0.98036
1684	Cathepsin E	Muscle atrophy and atrophy	MR Egger	10	-0.195128	0.510093	0.712028	-1.19491	0.804654	0.822729	0.302731	2.23592		0.386544			0.954765
1685	Cathepsin E	Muscle atrophy and atrophy	Weighted median	10	-0.156242	0.406113	0.70044	-0.952224	0.63974	0.855352	0.385882	1.89599					1
1686	Cathepsin E	Muscle atrophy and atrophy	Simple mode	10	0.146525	0.604699	0.813971	-1.03868	1.33173	1.1578	0.35392	3.78761					1
1687	Cathepsin E	Muscle atrophy and atrophy	Weighted mode	10	0.146525	0.496387	0.77455	-0.826394	1.11944	1.1578	0.437625	3.06315					1
1688	Cathepsin E	Muscle atrophy and atrophy	Maximum likelihood	10	-0.164083	0.300457	0.58499	-0.752979	0.424813	0.848672	0.470962	1.5293					0.913405
1689	Cathepsin H	Muscle atrophy and atrophy	Inverse variance weighted	11	0.027176	0.236059	0.908347	-0.4355	0.489852	1.02755	0.646941	1.63207	126.485	0.0751875	0.9276	0.257	0.974011
1690	Cathepsin H	Muscle atrophy and atrophy	MR Egger	11	0.00525814	0.34187	0.988064	-0.664806	0.675322	1.00527	0.514373	1.96467		0.04956			1
1691	Cathepsin H	Muscle atrophy and atrophy	Weighted median	11	-0.0872311	0.19591	0.656131	-0.471215	0.296753	0.916465	0.624243	1.34548					1
1692	Cathepsin H	Muscle atrophy and atrophy	Simple mode	11	-0.106969	0.539638	0.846842	-1.16466	0.950721	0.898554	0.312029	2.58757					1
1693	Cathepsin H	Muscle atrophy and atrophy	Weighted mode	11	-0.106969	0.177767	0.560744	-0.455393	0.241455	0.898554	0.634199	1.2731					1
1694	Cathepsin H	Muscle atrophy and atrophy	Maximum likelihood	11	0.0272836	0.182514	0.881169	-0.330444	0.385011	1.02766	0.718605	1.46963					0.944868
1695	Cathepsin O	Muscle atrophy and atrophy	Inverse variance weighted	12	-0.0669516	0.364182	0.854138	-0.780748	0.646845	0.93524	0.458063	1.90951	23.2138	0.49222	0.270273	0.48	0.980881
1696	Cathepsin O	Muscle atrophy and atrophy	MR Egger	12	-0.948062	0.838247	0.284447	-2.59103	0.694901	0.387491	0.0749432	2.00351		0.52571			0.9872
1697	Cathepsin O	Muscle atrophy and atrophy	Weighted median	12	-0.545313	0.472961	0.24892	-1.47232	0.38169	0.57966	0.229393	1.46476					1
1698	Cathepsin O	Muscle atrophy and atrophy	Simple mode	12	-0.976469	0.77978	0.236454	-2.50484	0.551901	0.376639	0.0816888	1.73655					1
1699	Cathepsin O	Muscle atrophy and atrophy	Weighted mode	12	-0.81071	0.694675	0.267873	-2.17227	0.550854	0.444542	0.113918	1.73473					1
1700	Cathepsin O	Muscle atrophy and atrophy	Maximum likelihood	12	-0.0703476	0.372145	0.850067	-0.799752	0.659057	0.93207	0.44944	1.93297					0.951647
1701	Cathepsin S	Muscle atrophy and atrophy	Inverse variance weighted	24	0.118418	0.230537	0.607489	-0.333434	0.57027	1.12571	0.716459	1.76874	39.7152	0.399411	0.0855697	0.364	0.940287
1702	Cathepsin S	Muscle atrophy and atrophy	MR Egger	24	-0.44929	0.387587	0.258803	-1.20896	0.31038	0.638081	0.298508	1.36394		0.530697			0.995827
1703	Cathepsin S	Muscle atrophy and atrophy	Weighted median	24	-0.269852	0.318859	0.397383	-0.894815	0.355111	0.763493	0.408683	1.42634					0.950496
1704	Cathepsin S	Muscle atrophy and atrophy	Simple mode	24	0.15421	0.717903	0.831812	-1.25288	1.5613	1.16674	0.285681	4.76501					1
1705	Cathepsin S	Muscle atrophy and atrophy	Weighted mode	24	-0.284896	0.340954	0.411986	-0.953167	0.383375	0.752092	0.385518	1.46723					1
1706	Cathepsin S	Muscle atrophy and atrophy	Maximum likelihood	24	0.122534	0.228619	0.591977	-0.32556	0.570628	1.13036	0.722123	1.76938					0.908378
1707	Cathepsin L2	Muscle atrophy and atrophy	Inverse variance weighted	11	-0.448482	0.418039	0.28335	-1.26784	0.370874	0.638597	0.281439	1.449	24.6843	0.407481	0.929358	0.452	0.969929
1708	Cathepsin L2	Muscle atrophy and atrophy	MR Egger	11	-0.550113	1.19865	0.657158	-2.89947	1.79925	0.576885	0.0550522	6.0451		0.321039			0.961297
1709	Cathepsin L2	Muscle atrophy and atrophy	Weighted median	11	0.0481931	0.574652	0.933164	-1.07812	1.17451	1.04937	0.340233	3.23656					0.971588
1710	Cathepsin L2	Muscle atrophy and atrophy	Simple mode	11	-0.0278806	0.824683	0.973696	-1.64426	1.5885	0.972504	0.193155	4.89639					1
1711	Cathepsin L2	Muscle atrophy and atrophy	Weighted mode	11	-0.0278806	0.697093	0.968884	-1.39418	1.33842	0.972504	0.248036	3.81302					1
1712	Cathepsin L2	Muscle atrophy and atrophy	Maximum likelihood	11	-0.443962	0.417846	0.288008	-1.26294	0.375016	0.64149	0.282821	1.45502					0.883887
1713	Cathepsin Z	Muscle atrophy and atrophy	Inverse variance weighted	13	0.180713	0.25715	0.482208	-0.3233	0.684727	1.19807	0.723757	1.98323	53.4584	0.643721	0.0703079	0.705	0.986587
1714	Cathepsin Z	Muscle atrophy and atrophy	MR Egger	13	-0.456299	0.408849	0.288184	-1.25764	0.345044	0.633624	0.284324	1.41205		0.894641			0.980933
1715	Cathepsin Z	Muscle atrophy and atrophy	Weighted median	13	0.042562	0.340298	0.900466	-0.624423	0.709547	1.04348	0.53557	2.03307					0.965955
1716	Cathepsin Z	Muscle atrophy and atrophy	Simple mode	13	0.0248116	0.543211	0.96432	-1.03988	1.0895	1.02512	0.353496	2.9728					1
1717	Cathepsin Z	Muscle atrophy and atrophy	Weighted mode	13	-0.036115	0.338897	0.916894	-0.700352	0.628122	0.964529	0.49641	1.87409					1
1718	Cathepsin Z	Muscle atrophy and atrophy	Maximum likelihood	13	0.183928	0.25896	0.477546	-0.323634	0.69149	1.20193	0.723515	1.99669					0.88545
1719	Cathepsin B	Osteoporosis	Inverse variance weighted	17	-0.0715079	0.0458327	0.118715	-0.16134	0.0183243	0.930989	0.851003	1.01849	35.5021	0.533349	0.172134	0.515	1
1720	Cathepsin B	Osteoporosis	MR Egger	17	0.0666368	0.106692	0.541636	-0.142479	0.275753	1.06891	0.867206	1.31752		0.615782			0.921823
1721	Cathepsin B	Osteoporosis	Weighted median	17	-0.00470428	0.063324	0.94078	-0.128819	0.119411	0.995307	0.879133	1.12683					0.968129
1722	Cathepsin B	Osteoporosis	Simple mode	17	-0.00801454	0.122499	0.948646	-0.248113	0.232083	0.992017	0.780272	1.26122					1
1723	Cathepsin B	Osteoporosis	Weighted mode	17	0.00926649	0.0765056	0.905103	-0.140684	0.159217	1.00931	0.868763	1.17259					1
1724	Cathepsin B	Osteoporosis	Maximum likelihood	17	-0.0724718	0.0463812	0.118164	-0.163379	0.0184353	0.930092	0.849269	1.01861					0.808968
1725	Cathepsin F	Osteoporosis	Inverse variance weighted	12	-0.0309996	0.0628531	0.621866	-0.154192	0.0921924	0.969476	0.857108	1.09658	36.6058	0.0541855	0.9394	0.05	0.938069
1726	Cathepsin F	Osteoporosis	MR Egger	12	-0.0418762	0.154302	0.791611	-0.344309	0.260557	0.958988	0.70871	1.29765		0.0355332			0.979826
1727	Cathepsin F	Osteoporosis	Weighted median	12	-0.0443834	0.0771983	0.565341	-0.195692	0.106925	0.956587	0.822265	1.11285					1
1728	Cathepsin F	Osteoporosis	Simple mode	12	-0.180085	0.165229	0.299052	-0.503934	0.143763	0.835199	0.604149	1.15461					1
1729	Cathepsin F	Osteoporosis	Weighted mode	12	-0.149679	0.115134	0.220167	-0.375341	0.0759833	0.860984	0.687055	1.07894					1
1730	Cathepsin F	Osteoporosis	Maximum likelihood	12	-0.0327698	0.0486048	0.500178	-0.128035	0.0624956	0.967761	0.879822	1.06449					0.87286
1731	Cathepsin G	Osteoporosis	Inverse variance weighted	13	0.0236485	0.0534415	0.65812	-0.081097	0.128394	1.02393	0.922104	1.137	22.9823	0.87651	0.398532	0.828	0.968143
1732	Cathepsin G	Osteoporosis	MR Egger	13	0.101558	0.103555	0.34781	-0.10141	0.304526	1.10689	0.903563	1.35598		0.8778			0.977181
1733	Cathepsin G	Osteoporosis	Weighted median	13	0.0821308	0.07408	0.267569	-0.063066	0.227328	1.0856	0.938882	1.25524					1
1734	Cathepsin G	Osteoporosis	Simple mode	13	0.071166	0.116468	0.552574	-0.15711	0.299442	1.07376	0.85461	1.34911					1
1735	Cathepsin G	Osteoporosis	Weighted mode	13	0.0883178	0.0806888	0.295198	-0.0698323	0.246468	1.09234	0.93255	1.2795					1
1736	Cathepsin G	Osteoporosis	Maximum likelihood	13	0.0245855	0.0539115	0.648366	-0.0810811	0.130252	1.02489	0.922119	1.13912					0.938285
1737	Cathepsin E	Osteoporosis	Inverse variance weighted	10	0.0456027	0.0698646	0.513931	-0.091332	0.182537	1.04666	0.912715	1.20026	21.973	0.0360834	0.225876	0.052	0.962945
1738	Cathepsin E	Osteoporosis	MR Egger	10	-0.0727609	0.1125	0.535895	-0.29326	0.147739	0.929823	0.745828	1.15921		0.0642238			0.920908
1739	Cathepsin E	Osteoporosis	Weighted median	10	-0.0113272	0.0732951	0.877182	-0.154986	0.132331	0.988737	0.856427	1.14149					0.995264
1740	Cathepsin E	Osteoporosis	Simple mode	10	-0.0719166	0.127816	0.587408	-0.322436	0.178603	0.930609	0.724382	1.19555					1
1741	Cathepsin E	Osteoporosis	Weighted mode	10	-0.0316492	0.0826043	0.710507	-0.193554	0.130255	0.968846	0.824026	1.13912					1
1742	Cathepsin E	Osteoporosis	Maximum likelihood	10	0.0484866	0.0518396	0.349624	-0.053119	0.150092	1.04968	0.948267	1.16194					0.889043
1743	Cathepsin H	Osteoporosis	Inverse variance weighted	11	-0.011351	0.0299475	0.704665	-0.0700482	0.0473461	0.988713	0.932349	1.04848	126.485	0.830851	0.777781	0.89	0.987641
1744	Cathepsin H	Osteoporosis	MR Egger	11	-0.0195609	0.0411559	0.645905	-0.100227	0.0611047	0.980629	0.904632	1.06301		0.766915			0.977138
1745	Cathepsin H	Osteoporosis	Weighted median	11	-0.00994426	0.0316758	0.753568	-0.0720289	0.0521404	0.990105	0.930504	1.05352					1
1746	Cathepsin H	Osteoporosis	Simple mode	11	-0.0421409	0.0843095	0.628005	-0.207388	0.123106	0.958735	0.812705	1.131					1
1747	Cathepsin H	Osteoporosis	Weighted mode	11	-0.0108758	0.0313717	0.736019	-0.0723644	0.0506127	0.989183	0.930192	1.05192					1
1748	Cathepsin H	Osteoporosis	Maximum likelihood	11	-0.0112906	0.0300133	0.706777	-0.0701166	0.0475354	0.988773	0.932285	1.04868					0.953078
1749	Cathepsin O	Osteoporosis	Inverse variance weighted	12	-0.0422814	0.0605235	0.484806	-0.160908	0.0763448	0.9586	0.851371	1.07933	23.2138	0.639625	0.0687623	0.665	0.98063
1750	Cathepsin O	Osteoporosis	MR Egger	12	-0.298661	0.139546	0.0580123	-0.572172	-0.0251506	0.741811	0.564299	0.975163		0.913281			1
1751	Cathepsin O	Osteoporosis	Weighted median	12	-0.0434833	0.0753111	0.563681	-0.191093	0.104126	0.957449	0.826056	1.10974					1
1752	Cathepsin O	Osteoporosis	Simple mode	12	-0.0255003	0.114472	0.827801	-0.249865	0.198865	0.974822	0.778906	1.22002					1
1753	Cathepsin O	Osteoporosis	Weighted mode	12	-0.0433379	0.102867	0.681649	-0.244957	0.158281	0.957588	0.782738	1.1715					1
1754	Cathepsin O	Osteoporosis	Maximum likelihood	12	-0.0424697	0.0613968	0.48911	-0.162807	0.077868	0.958419	0.849755	1.08098					0.888383
1755	Cathepsin S	Osteoporosis	Inverse variance weighted	24	0.0536006	0.0380904	0.15937	-0.0210567	0.128258	1.05506	0.979163	1.13685	39.7152	0.4181	0.0118334	0.334	1
1756	Cathepsin S	Osteoporosis	MR Egger	24	-0.0910263	0.064672	0.17325	-0.217783	0.0357308	0.912994	0.8043	1.03638		0.805235			1
1757	Cathepsin S	Osteoporosis	Weighted median	24	-0.0150817	0.0537631	0.779078	-0.120457	0.090294	0.985031	0.886515	1.0945					0.999252
1758	Cathepsin S	Osteoporosis	Simple mode	24	0.127938	0.116618	0.283963	-0.100633	0.35651	1.13648	0.904265	1.42834					1
1759	Cathepsin S	Osteoporosis	Weighted mode	24	-0.0459173	0.0569246	0.42814	-0.15749	0.0656549	0.955121	0.854286	1.06786					1
1760	Cathepsin S	Osteoporosis	Maximum likelihood	24	0.0555214	0.0380553	0.144575	-0.019067	0.13011	1.05709	0.981114	1.13895					0.779827
1761	Cathepsin L2	Osteoporosis	Inverse variance weighted	11	-0.0767547	0.0784685	0.327996	-0.230553	0.0770436	0.926117	0.794094	1.08009	24.6843	0.20878	0.119322	0.21	0.989546
1762	Cathepsin L2	Osteoporosis	MR Egger	11	0.235739	0.195218	0.257988	-0.146887	0.618366	1.26584	0.863391	1.85589		0.351593			1
1763	Cathepsin L2	Osteoporosis	Weighted median	11	-0.0755352	0.0988204	0.444648	-0.269223	0.118153	0.927247	0.763973	1.12542					0.948226
1764	Cathepsin L2	Osteoporosis	Simple mode	11	-0.119572	0.170334	0.498701	-0.453425	0.214282	0.887301	0.635448	1.23897					1
1765	Cathepsin L2	Osteoporosis	Weighted mode	11	-0.104955	0.148639	0.496243	-0.396288	0.186377	0.900365	0.672813	1.20488					1
1766	Cathepsin L2	Osteoporosis	Maximum likelihood	11	-0.0778504	0.0702615	0.267858	-0.215563	0.0598621	0.925103	0.806088	1.06169					0.882938
1767	Cathepsin Z	Osteoporosis	Inverse variance weighted	13	0.0327909	0.0591143	0.579098	-0.0830732	0.148655	1.03333	0.920284	1.16027	53.4584	0.0254353	0.0267449	0.044	0.981708
1768	Cathepsin Z	Osteoporosis	MR Egger	13	-0.12111	0.0775879	0.146828	-0.273183	0.030962	0.885936	0.760954	1.03145		0.201096			1
1769	Cathepsin Z	Osteoporosis	Weighted median	13	-0.00425659	0.0696379	0.95126	-0.140747	0.132234	0.995752	0.868709	1.14137					0.973254
1770	Cathepsin Z	Osteoporosis	Simple mode	13	0.230909	0.139668	0.124179	-0.0428403	0.504658	1.25974	0.958064	1.65642					1
1771	Cathepsin Z	Osteoporosis	Weighted mode	13	0.00588525	0.0830028	0.944642	-0.1568	0.168571	1.0059	0.854875	1.18361					1
1772	Cathepsin Z	Osteoporosis	Maximum likelihood	13	0.0343945	0.0431592	0.425497	-0.0501975	0.118986	1.03499	0.951042	1.12635					0.880679
1773	Cathepsin B	Arthropathy of Crohn's disease	Inverse variance weighted	17	-0.0516372	0.232593	0.824309	-0.507519	0.404245	0.949673	0.601987	1.49817	35.5021	0.768428	0.898729	0.756	0.971702
1774	Cathepsin B	Arthropathy of Crohn's disease	MR Egger	17	-0.114993	0.541917	0.83481	-1.17715	0.947164	0.891372	0.308156	2.57839		0.70736			0.985075
1775	Cathepsin B	Arthropathy of Crohn's disease	Weighted median	17	0.0480875	0.327289	0.88319	-0.5934	0.689575	1.04926	0.552446	1.99287					0.983174
1776	Cathepsin B	Arthropathy of Crohn's disease	Simple mode	17	0.489875	0.550672	0.386863	-0.589441	1.56919	1.63211	0.554637	4.80276					1
1777	Cathepsin B	Arthropathy of Crohn's disease	Weighted mode	17	0.0728003	0.38777	0.85344	-0.687228	0.832829	1.07552	0.502968	2.29982					1
1778	Cathepsin B	Arthropathy of Crohn's disease	Maximum likelihood	17	-0.0526925	0.235186	0.822721	-0.513656	0.408271	0.948672	0.598304	1.50422					0.957153
1779	Cathepsin F	Arthropathy of Crohn's disease	Inverse variance weighted	12	0.210393	0.239652	0.379992	-0.259325	0.68011	1.23416	0.771573	1.9741	36.6058	0.9544	0.661732	0.958	1
1780	Cathepsin F	Arthropathy of Crohn's disease	MR Egger	12	-0.0185564	0.56155	0.974289	-1.11919	1.08208	0.981615	0.326543	2.95081		0.934911			1
1781	Cathepsin F	Arthropathy of Crohn's disease	Weighted median	12	0.168922	0.319437	0.596937	-0.457174	0.795017	1.18403	0.63307	2.21448					1
1782	Cathepsin F	Arthropathy of Crohn's disease	Simple mode	12	0.586516	0.525157	0.287864	-0.442791	1.61582	1.79771	0.642241	5.03203					1
1783	Cathepsin F	Arthropathy of Crohn's disease	Weighted mode	12	0.146568	0.385742	0.711206	-0.609486	0.902622	1.15785	0.54363	2.46606					1
1784	Cathepsin F	Arthropathy of Crohn's disease	Maximum likelihood	12	0.214308	0.24161	0.37508	-0.259248	0.687864	1.239	0.771632	1.98946					0.855951
1785	Cathepsin G	Arthropathy of Crohn's disease	Inverse variance weighted	13	0.135894	0.269973	0.61471	-0.393253	0.665041	1.14556	0.674858	1.94457	22.9823	0.866104	0.476575	0.863	0.943262
1786	Cathepsin G	Arthropathy of Crohn's disease	MR Egger	13	0.465978	0.522974	0.391994	-0.559052	1.49101	1.59357	0.571751	4.44157		0.85071			1
1787	Cathepsin G	Arthropathy of Crohn's disease	Weighted median	13	0.408888	0.373069	0.273074	-0.322328	1.1401	1.50514	0.72446	3.12709					1
1788	Cathepsin G	Arthropathy of Crohn's disease	Simple mode	13	0.345484	0.564006	0.551603	-0.759968	1.45094	1.41267	0.467682	4.2671					1
1789	Cathepsin G	Arthropathy of Crohn's disease	Weighted mode	13	0.385973	0.397059	0.350197	-0.392262	1.16421	1.47105	0.675527	3.20339					1
1790	Cathepsin G	Arthropathy of Crohn's disease	Maximum likelihood	13	0.138766	0.271624	0.609438	-0.393617	0.671149	1.14886	0.674612	1.95648					0.919322
1791	Cathepsin E	Arthropathy of Crohn's disease	Inverse variance weighted	10	-0.171746	0.250725	0.493346	-0.663166	0.319675	0.842193	0.515218	1.37668	21.973	0.754466	0.221322	0.803	0.954517
1792	Cathepsin E	Arthropathy of Crohn's disease	MR Egger	10	-0.617605	0.419351	0.179034	-1.43953	0.204323	0.539234	0.237038	1.22669		0.84851			1
1793	Cathepsin E	Arthropathy of Crohn's disease	Weighted median	10	-0.299113	0.34142	0.380984	-0.968296	0.370071	0.741476	0.37973	1.44784					0.963346
1794	Cathepsin E	Arthropathy of Crohn's disease	Simple mode	10	-0.344884	0.481951	0.492385	-1.28951	0.59974	0.708302	0.275406	1.82165					1
1795	Cathepsin E	Arthropathy of Crohn's disease	Weighted mode	10	-0.365218	0.381901	0.363894	-1.11374	0.383308	0.694045	0.328327	1.46713					1
1796	Cathepsin E	Arthropathy of Crohn's disease	Maximum likelihood	10	-0.174443	0.252374	0.489436	-0.669096	0.320211	0.839925	0.512171	1.37742					0.879995
1797	Cathepsin H	Arthropathy of Crohn's disease	Inverse variance weighted	11	0.104122	0.151137	0.49087	-0.192106	0.40035	1.10974	0.825219	1.49235	126.485	0.508967	0.265072	0.435	0.981741
1798	Cathepsin H	Arthropathy of Crohn's disease	MR Egger	11	0.273461	0.207714	0.220536	-0.133659	0.680582	1.31451	0.874888	1.97503		0.551041			1
1799	Cathepsin H	Arthropathy of Crohn's disease	Weighted median	11	0.220208	0.167311	0.18812	-0.107722	0.548138	1.24634	0.897878	1.73003					1
1800	Cathepsin H	Arthropathy of Crohn's disease	Simple mode	11	-0.00111582	0.517735	0.998323	-1.01588	1.01364	0.998885	0.362085	2.75562					0.998323
1801	Cathepsin H	Arthropathy of Crohn's disease	Weighted mode	11	0.222153	0.170198	0.221037	-0.111436	0.555742	1.24876	0.894549	1.74323					1
1802	Cathepsin H	Arthropathy of Crohn's disease	Maximum likelihood	11	0.105386	0.151663	0.487137	-0.191874	0.402646	1.11114	0.825411	1.49578					0.893922
1803	Cathepsin O	Arthropathy of Crohn's disease	Inverse variance weighted	12	0.11321	0.307043	0.712342	-0.488593	0.715014	1.11987	0.613489	2.04422	23.2138	0.851018	0.9425	0.858	0.990601
1804	Cathepsin O	Arthropathy of Crohn's disease	MR Egger	12	0.160534	0.709706	0.825604	-1.23049	1.55156	1.17414	0.292149	4.71882		0.78798			0.987378
1805	Cathepsin O	Arthropathy of Crohn's disease	Weighted median	12	0.356009	0.401147	0.374821	-0.430239	1.14226	1.42762	0.650354	3.13384					0.975638
1806	Cathepsin O	Arthropathy of Crohn's disease	Simple mode	12	0.372052	0.586824	0.539035	-0.778124	1.52223	1.45071	0.459267	4.58242					1
1807	Cathepsin O	Arthropathy of Crohn's disease	Weighted mode	12	0.393769	0.544959	0.485026	-0.674351	1.46189	1.48256	0.509487	4.3141					1
1808	Cathepsin O	Arthropathy of Crohn's disease	Maximum likelihood	12	0.117297	0.309996	0.705147	-0.490296	0.72489	1.12445	0.612445	2.0645					0.958138
1809	Cathepsin S	Arthropathy of Crohn's disease	Inverse variance weighted	24	0.0311594	0.217243	0.88595	-0.394637	0.456956	1.03165	0.673925	1.57926	39.7152	0.144866	0.127508	0.109	0.979497
1810	Cathepsin S	Arthropathy of Crohn's disease	MR Egger	24	0.498112	0.362234	0.182941	-0.211867	1.20809	1.64561	0.809072	3.34709		0.208467			1
1811	Cathepsin S	Arthropathy of Crohn's disease	Weighted median	24	0.551554	0.275261	0.0450967	0.012043	1.09107	1.73595	1.01212	2.97744					0.997765
1812	Cathepsin S	Arthropathy of Crohn's disease	Simple mode	24	0.261588	0.512488	0.614616	-0.742888	1.26606	1.29899	0.475738	3.54686					1
1813	Cathepsin S	Arthropathy of Crohn's disease	Weighted mode	24	0.532506	0.301435	0.0905703	-0.058306	1.12332	1.70319	0.943361	3.07504					1
1814	Cathepsin S	Arthropathy of Crohn's disease	Maximum likelihood	24	0.0323755	0.19288	0.866699	-0.345669	0.41042	1.03291	0.707747	1.50745					0.940685
1815	Cathepsin L2	Arthropathy of Crohn's disease	Inverse variance weighted	11	0.132605	0.363374	0.715165	-0.579608	0.844818	1.1418	0.560118	2.32756	24.6843	0.355395	0.223916	0.371	0.979226
1816	Cathepsin L2	Arthropathy of Crohn's disease	MR Egger	11	1.30051	0.960692	0.208841	-0.582448	3.18347	3.67116	0.558529	24.1302		0.412714			1
1817	Cathepsin L2	Arthropathy of Crohn's disease	Weighted median	11	0.202305	0.510056	0.691638	-0.797404	1.20201	1.22422	0.450497	3.32681					1
1818	Cathepsin L2	Arthropathy of Crohn's disease	Simple mode	11	0.35203	0.791682	0.666034	-1.19967	1.90373	1.42195	0.301294	6.71086					1
1819	Cathepsin L2	Arthropathy of Crohn's disease	Weighted mode	11	0.253244	0.584237	0.673881	-0.891861	1.39835	1.2882	0.409892	4.04851					1
1820	Cathepsin L2	Arthropathy of Crohn's disease	Maximum likelihood	11	0.140376	0.353622	0.691392	-0.552722	0.833474	1.15071	0.575381	2.3013					0.961467
1821	Cathepsin Z	Arthropathy of Crohn's disease	Inverse variance weighted	13	0.168432	0.295185	0.568273	-0.410132	0.746995	1.18345	0.663563	2.11065	53.4584	0.0343931	0.959313	0.067	0.991692
1822	Cathepsin Z	Arthropathy of Crohn's disease	MR Egger	13	0.188479	0.492519	0.709246	-0.776859	1.15382	1.20741	0.459848	3.17027		0.0222582			0.958294
1823	Cathepsin Z	Arthropathy of Crohn's disease	Weighted median	13	0.219627	0.287809	0.445404	-0.344478	0.783732	1.24561	0.70859	2.18963					0.938529
1824	Cathepsin Z	Arthropathy of Crohn's disease	Simple mode	13	0.279704	0.532854	0.609203	-0.76469	1.3241	1.32274	0.465478	3.75879					1
1825	Cathepsin Z	Arthropathy of Crohn's disease	Weighted mode	13	0.181828	0.29894	0.554366	-0.404096	0.767751	1.19941	0.66758	2.15491					1
1826	Cathepsin Z	Arthropathy of Crohn's disease	Maximum likelihood	13	0.176432	0.221221	0.425138	-0.257161	0.610026	1.19295	0.773244	1.84048					0.89029
1827	Cathepsin B	Arthropathy of ulcerative colitis	Inverse variance weighted	17	-0.543353	0.205332	0.00813986	-0.945804	-0.140902	0.580798	0.388367	0.868575	35.5021	0.86377	0.909418	0.888	0.241483
1828	Cathepsin B	Arthropathy of ulcerative colitis	MR Egger	17	-0.59338	0.478636	0.23412	-1.53151	0.344746	0.552457	0.21621	1.41163		0.81715			1
1829	Cathepsin B	Arthropathy of ulcerative colitis	Weighted median	17	-0.561622	0.30337	0.0641302	-1.15623	0.0329844	0.570283	0.314671	1.03353					1
1830	Cathepsin B	Arthropathy of ulcerative colitis	Simple mode	17	-0.505449	0.453894	0.281908	-1.39508	0.384184	0.603235	0.247813	1.46842					1
1831	Cathepsin B	Arthropathy of ulcerative colitis	Weighted mode	17	-0.580578	0.336597	0.103815	-1.24031	0.0791515	0.559575	0.289295	1.08237					1
1832	Cathepsin B	Arthropathy of ulcerative colitis	Maximum likelihood	17	-0.540857	0.208358	0.0094369	-0.949239	-0.132476	0.582249	0.387035	0.875924					0.279961
1833	Cathepsin F	Arthropathy of ulcerative colitis	Inverse variance weighted	12	0.0616105	0.211523	0.770844	-0.352975	0.476197	1.06355	0.702594	1.60994	36.6058	0.501151	0.67506	0.491	0.980074
1834	Cathepsin F	Arthropathy of ulcerative colitis	MR Egger	12	-0.133627	0.499818	0.794631	-1.11327	0.846015	0.874916	0.328483	2.33034		0.428391			0.976734
1835	Cathepsin F	Arthropathy of ulcerative colitis	Weighted median	12	0.0958321	0.289291	0.740444	-0.471177	0.662842	1.10057	0.624267	1.9403					1
1836	Cathepsin F	Arthropathy of ulcerative colitis	Simple mode	12	0.158343	0.472521	0.743851	-0.767798	1.08448	1.17157	0.464034	2.95792					1
1837	Cathepsin F	Arthropathy of ulcerative colitis	Weighted mode	12	0.178394	0.421204	0.680069	-0.647166	1.00395	1.1953	0.523527	2.72905					1
1838	Cathepsin F	Arthropathy of ulcerative colitis	Maximum likelihood	12	0.0635706	0.214794	0.76726	-0.357425	0.484566	1.06563	0.699475	1.62347					0.975516
1839	Cathepsin G	Arthropathy of ulcerative colitis	Inverse variance weighted	13	0.0775034	0.262896	0.768142	-0.437773	0.59278	1.08059	0.645472	1.80901	22.9823	0.26566	0.544296	0.304	0.998024
1840	Cathepsin G	Arthropathy of ulcerative colitis	MR Egger	13	-0.202795	0.522982	0.705587	-1.22784	0.82225	0.816445	0.292924	2.27561		0.229058			0.968131
1841	Cathepsin G	Arthropathy of ulcerative colitis	Weighted median	13	-0.14096	0.330628	0.669861	-0.788991	0.507072	0.868524	0.454303	1.66042					1
1842	Cathepsin G	Arthropathy of ulcerative colitis	Simple mode	13	0.371836	0.504879	0.475588	-0.617728	1.3614	1.45039	0.539168	3.90165					1
1843	Cathepsin G	Arthropathy of ulcerative colitis	Weighted mode	13	-0.242465	0.358101	0.511193	-0.944344	0.459413	0.784691	0.388935	1.58314					1
1844	Cathepsin G	Arthropathy of ulcerative colitis	Maximum likelihood	13	0.0819629	0.24544	0.738423	-0.3991	0.563026	1.08542	0.670924	1.75598					0.959411
1845	Cathepsin E	Arthropathy of ulcerative colitis	Inverse variance weighted	10	0.0949226	0.303233	0.754254	-0.499415	0.68926	1.09957	0.606886	1.99224	21.973	0.0505042	0.356916	0.081	0.987186
1846	Cathepsin E	Arthropathy of ulcerative colitis	MR Egger	10	-0.303662	0.508574	0.566961	-1.30047	0.693143	0.738111	0.272405	1.99999		0.0575021			0.912293
1847	Cathepsin E	Arthropathy of ulcerative colitis	Weighted median	10	-0.234569	0.313839	0.454811	-0.849695	0.380556	0.790911	0.427545	1.4631					0.936065
1848	Cathepsin E	Arthropathy of ulcerative colitis	Simple mode	10	-0.420346	0.603348	0.503592	-1.60291	0.762216	0.656819	0.20131	2.14302					1
1849	Cathepsin E	Arthropathy of ulcerative colitis	Weighted mode	10	-0.267379	0.409614	0.53023	-1.07022	0.535465	0.765383	0.342932	1.70824					1
1850	Cathepsin E	Arthropathy of ulcerative colitis	Maximum likelihood	10	0.100862	0.231158	0.662594	-0.352207	0.553931	1.10612	0.703135	1.74008					0.943534
1851	Cathepsin H	Arthropathy of ulcerative colitis	Inverse variance weighted	11	0.0912304	0.172839	0.597613	-0.247533	0.429994	1.09552	0.780724	1.53725	126.485	0.0779168	0.178493	0.293	0.958335
1852	Cathepsin H	Arthropathy of ulcerative colitis	MR Egger	11	-0.134113	0.225139	0.566059	-0.575386	0.30716	0.874491	0.562488	1.35956		0.136494			0.919197
1853	Cathepsin H	Arthropathy of ulcerative colitis	Weighted median	11	0.0382537	0.151615	0.800803	-0.258911	0.335418	1.03899	0.771892	1.39853					0.998184
1854	Cathepsin H	Arthropathy of ulcerative colitis	Simple mode	11	0.93853	0.546539	0.116693	-0.132686	2.00975	2.55622	0.87574	7.46142					1
1855	Cathepsin H	Arthropathy of ulcerative colitis	Weighted mode	11	-0.015757	0.151172	0.919046	-0.312054	0.28054	0.984367	0.731942	1.32384					1
1856	Cathepsin H	Arthropathy of ulcerative colitis	Maximum likelihood	11	0.0921448	0.13401	0.491706	-0.170514	0.354804	1.09652	0.843231	1.4259					0.875237
1857	Cathepsin O	Arthropathy of ulcerative colitis	Inverse variance weighted	12	0.147603	0.37822	0.696346	-0.593708	0.888914	1.15905	0.552276	2.43249	23.2138	0.0352783	0.299368	0.209	0.999594
1858	Cathepsin O	Arthropathy of ulcerative colitis	MR Egger	12	1.03099	0.889872	0.273545	-0.713158	2.77514	2.80384	0.490094	16.0409		0.0457476			0.988113
1859	Cathepsin O	Arthropathy of ulcerative colitis	Weighted median	12	-0.339535	0.402842	0.399313	-1.12911	0.450036	0.712101	0.323322	1.56837					0.94238
1860	Cathepsin O	Arthropathy of ulcerative colitis	Simple mode	12	-0.83853	0.601095	0.190542	-2.01668	0.339616	0.432345	0.133097	1.40441					1
1861	Cathepsin O	Arthropathy of ulcerative colitis	Weighted mode	12	-0.626741	0.5905	0.311268	-1.78412	0.530638	0.53433	0.167945	1.70002					1
1862	Cathepsin O	Arthropathy of ulcerative colitis	Maximum likelihood	12	0.162285	0.287638	0.572619	-0.401486	0.726056	1.1762	0.669325	2.06691					0.902001
1863	Cathepsin S	Arthropathy of ulcerative colitis	Inverse variance weighted	24	0.0159803	0.167581	0.92403	-0.312479	0.344439	1.01611	0.731631	1.4112	39.7152	0.969081	0.936017	0.972	0.973239
1864	Cathepsin S	Arthropathy of ulcerative colitis	MR Egger	24	-0.00310805	0.288694	0.991507	-0.568949	0.562732	0.996897	0.56612	1.75546		0.955662			1
1865	Cathepsin S	Arthropathy of ulcerative colitis	Weighted median	24	-0.0329302	0.240946	0.891291	-0.505185	0.439324	0.967606	0.603394	1.55166					0.979867
1866	Cathepsin S	Arthropathy of ulcerative colitis	Simple mode	24	0.0853936	0.426894	0.843212	-0.751319	0.922106	1.08915	0.471744	2.51458					1
1867	Cathepsin S	Arthropathy of ulcerative colitis	Weighted mode	24	-0.032511	0.258531	0.90102	-0.539232	0.47421	0.968012	0.583196	1.60674					1
1868	Cathepsin S	Arthropathy of ulcerative colitis	Maximum likelihood	24	0.0161722	0.168794	0.923671	-0.314664	0.347008	1.0163	0.730034	1.41483					0.972861
1869	Cathepsin L2	Arthropathy of ulcerative colitis	Inverse variance weighted	11	0.700481	0.334769	0.0364004	0.0443324	1.35663	2.01472	1.04533	3.88308	24.6843	0.282734	0.725913	0.341	0.647927
1870	Cathepsin L2	Arthropathy of ulcerative colitis	MR Egger	11	1.02297	0.957924	0.31337	-0.854561	2.9005	2.78144	0.42547	18.1833		0.221181			0.973096
1871	Cathepsin L2	Arthropathy of ulcerative colitis	Weighted median	11	1.00925	0.417124	0.0155395	0.191692	1.82682	2.74355	1.2113	6.21408					0.687621
1872	Cathepsin L2	Arthropathy of ulcerative colitis	Simple mode	11	1.12357	0.568749	0.0764418	0.00881868	2.23832	3.07581	1.00886	9.37752					1
1873	Cathepsin L2	Arthropathy of ulcerative colitis	Weighted mode	11	1.24314	0.516088	0.0367601	0.231609	2.25467	3.46648	1.26063	9.53217					1
1874	Cathepsin L2	Arthropathy of ulcerative colitis	Maximum likelihood	11	0.720594	0.310714	0.0203867	0.111594	1.32959	2.05565	1.11806	3.77951					0.453604
1875	Cathepsin Z	Arthropathy of ulcerative colitis	Inverse variance weighted	13	0.174331	0.219624	0.42733	-0.256132	0.604794	1.19045	0.77404	1.83087	53.4584	0.198098	0.489815	0.283	1
1876	Cathepsin Z	Arthropathy of ulcerative colitis	MR Egger	13	0.374747	0.359124	0.319106	-0.329136	1.07863	1.45462	0.719545	2.94065		0.175768			0.973822
1877	Cathepsin Z	Arthropathy of ulcerative colitis	Weighted median	13	0.36989	0.24935	0.137963	-0.118835	0.858616	1.44758	0.887954	2.35989					1
1878	Cathepsin Z	Arthropathy of ulcerative colitis	Simple mode	13	0.287837	0.441159	0.526407	-0.576834	1.15251	1.33354	0.561674	3.16612					1
1879	Cathepsin Z	Arthropathy of ulcerative colitis	Weighted mode	13	0.343516	0.281881	0.24639	-0.20897	0.896003	1.4099	0.811419	2.44979					1
1880	Cathepsin Z	Arthropathy of ulcerative colitis	Maximum likelihood	13	0.178668	0.193888	0.356789	-0.201352	0.558688	1.19562	0.817624	1.74838					0.869979
1881	Cathepsin B	Postdysentery joint disease	Inverse variance weighted	17	0.241416	0.218897	0.27008	-0.187621	0.670454	1.27305	0.828929	1.95512	35.5021	0.806644	0.697649	0.815	0.981107
1882	Cathepsin B	Postdysentery joint disease	MR Egger	17	0.0589543	0.51007	0.909518	-0.940782	1.05869	1.06073	0.390322	2.88259		0.76042			0.993732
1883	Cathepsin B	Postdysentery joint disease	Weighted median	17	0.117375	0.328397	0.72078	-0.526284	0.761033	1.12454	0.590797	2.14049					1
1884	Cathepsin B	Postdysentery joint disease	Simple mode	17	0.0992329	0.448433	0.827668	-0.779696	0.978162	1.10432	0.458545	2.65956					1
1885	Cathepsin B	Postdysentery joint disease	Weighted mode	17	0.120276	0.360909	0.743266	-0.587105	0.827657	1.12781	0.555934	2.28795					1
1886	Cathepsin B	Postdysentery joint disease	Maximum likelihood	17	0.249016	0.221322	0.260534	-0.184775	0.682808	1.28276	0.831291	1.97943					0.891827
1887	Cathepsin F	Postdysentery joint disease	Inverse variance weighted	12	0.0564905	0.226696	0.803213	-0.387834	0.500815	1.05812	0.678525	1.65006	36.6058	0.975406	0.618076	0.97	0.97926
1888	Cathepsin F	Postdysentery joint disease	MR Egger	12	-0.190126	0.530229	0.727369	-1.22937	0.849124	0.826855	0.292475	2.3376		0.965887			0.960779
1889	Cathepsin F	Postdysentery joint disease	Weighted median	12	0.174243	0.306944	0.57026	-0.427368	0.775853	1.19034	0.652223	2.17245					0.999367
1890	Cathepsin F	Postdysentery joint disease	Simple mode	12	-0.0419256	0.477087	0.931553	-0.977016	0.893165	0.958941	0.376433	2.44285					1
1891	Cathepsin F	Postdysentery joint disease	Weighted mode	12	0.358985	0.389528	0.376512	-0.404489	1.12246	1.43188	0.667318	3.0724					1
1892	Cathepsin F	Postdysentery joint disease	Maximum likelihood	12	0.0572859	0.227807	0.801453	-0.389216	0.503788	1.05896	0.677588	1.65498					0.970467
1893	Cathepsin G	Postdysentery joint disease	Inverse variance weighted	13	-0.0551707	0.322664	0.864236	-0.687591	0.57725	0.946324	0.502786	1.78113	22.9823	0.0864276	0.414741	0.166	0.979834
1894	Cathepsin G	Postdysentery joint disease	MR Egger	13	0.405502	0.634061	0.535568	-0.837257	1.64826	1.50006	0.432896	5.19794		0.0835072			0.929369
1895	Cathepsin G	Postdysentery joint disease	Weighted median	13	-0.157593	0.340432	0.643421	-0.824841	0.509654	0.854197	0.438305	1.66472					1
1896	Cathepsin G	Postdysentery joint disease	Simple mode	13	-0.293083	0.465229	0.540521	-1.20493	0.618766	0.745961	0.299713	1.85664					1
1897	Cathepsin G	Postdysentery joint disease	Weighted mode	13	-0.161668	0.333162	0.636236	-0.814666	0.491331	0.850724	0.442787	1.63449					1
1898	Cathepsin G	Postdysentery joint disease	Maximum likelihood	13	-0.0546803	0.258909	0.832735	-0.562141	0.452781	0.946788	0.569987	1.57268					0.956302
1899	Cathepsin E	Postdysentery joint disease	Inverse variance weighted	10	0.446833	0.277456	0.107297	-0.0969807	0.990646	1.56335	0.907574	2.69297	21.973	0.205939	0.775057	0.282	1
1900	Cathepsin E	Postdysentery joint disease	MR Egger	10	0.563135	0.490369	0.283984	-0.397987	1.52426	1.75617	0.671671	4.59173		0.151139			1
1901	Cathepsin E	Postdysentery joint disease	Weighted median	10	0.421647	0.351438	0.230226	-0.267171	1.11047	1.52447	0.765542	3.03577					1
1902	Cathepsin E	Postdysentery joint disease	Simple mode	10	0.293767	0.542825	0.601519	-0.77017	1.3577	1.34147	0.462935	3.88726					1
1903	Cathepsin E	Postdysentery joint disease	Weighted mode	10	0.467317	0.385475	0.256255	-0.288214	1.22285	1.59571	0.749601	3.39685					1
1904	Cathepsin E	Postdysentery joint disease	Maximum likelihood	10	0.466647	0.244155	0.0559689	-0.0118958	0.94519	1.59464	0.988175	2.5733					0.664164
1905	Cathepsin H	Postdysentery joint disease	Inverse variance weighted	11	-0.142292	0.142061	0.316523	-0.420732	0.136147	0.867368	0.656566	1.14585	126.485	0.76234	0.183576	0.548	0.971399
1906	Cathepsin H	Postdysentery joint disease	MR Egger	11	-0.335057	0.195159	0.120139	-0.717569	0.0474545	0.715297	0.487937	1.0486		0.8734			1
1907	Cathepsin H	Postdysentery joint disease	Weighted median	11	-0.232662	0.158279	0.141575	-0.542889	0.0775643	0.792421	0.581067	1.08065					1
1908	Cathepsin H	Postdysentery joint disease	Simple mode	11	-0.159647	0.4058	0.702271	-0.955015	0.635721	0.852445	0.384806	1.88838					1
1909	Cathepsin H	Postdysentery joint disease	Weighted mode	11	-0.232455	0.146865	0.144552	-0.52031	0.0553993	0.792585	0.594336	1.05696					1
1910	Cathepsin H	Postdysentery joint disease	Maximum likelihood	11	-0.142931	0.142507	0.315874	-0.422244	0.136383	0.866814	0.655574	1.14612					0.892468
1911	Cathepsin O	Postdysentery joint disease	Inverse variance weighted	12	-0.000753522	0.291393	0.997937	-0.571884	0.570377	0.999247	0.564461	1.76893	23.2138	0.984151	0.994146	0.984	0.997937
1912	Cathepsin O	Postdysentery joint disease	MR Egger	12	-0.00532501	0.673959	0.993851	-1.32628	1.31563	0.994689	0.265462	3.72711		0.970113			0.999498
1913	Cathepsin O	Postdysentery joint disease	Weighted median	12	0.169826	0.37339	0.649238	-0.56202	0.901671	1.1851	0.570057	2.46372					1
1914	Cathepsin O	Postdysentery joint disease	Simple mode	12	0.369864	0.552883	0.517307	-0.713788	1.45352	1.44754	0.489786	4.27813					1
1915	Cathepsin O	Postdysentery joint disease	Weighted mode	12	0.33033	0.559098	0.566579	-0.765503	1.42616	1.39143	0.4651	4.16269					1
1916	Cathepsin O	Postdysentery joint disease	Maximum likelihood	12	-0.000739458	0.293448	0.997989	-0.575898	0.574419	0.999261	0.5622	1.7761					0.997989
1917	Cathepsin S	Postdysentery joint disease	Inverse variance weighted	24	0.0526392	0.18066	0.770767	-0.301454	0.406733	1.05405	0.739742	1.5019	39.7152	0.836413	0.736675	0.827	0.987025
1918	Cathepsin S	Postdysentery joint disease	MR Egger	24	0.139505	0.312573	0.659734	-0.473138	0.752148	1.1497	0.623044	2.12155		0.800182			0.949374
1919	Cathepsin S	Postdysentery joint disease	Weighted median	24	0.284066	0.258712	0.272204	-0.223009	0.791141	1.32852	0.800107	2.20591					1
1920	Cathepsin S	Postdysentery joint disease	Simple mode	24	-0.279819	0.464385	0.552698	-1.19001	0.630376	0.755921	0.304217	1.87832					1
1921	Cathepsin S	Postdysentery joint disease	Weighted mode	24	0.233865	0.281852	0.415212	-0.318564	0.786295	1.26347	0.727192	2.19525					1
1922	Cathepsin S	Postdysentery joint disease	Maximum likelihood	24	0.0538899	0.182245	0.767459	-0.30331	0.41109	1.05537	0.73837	1.50846					0.968849
1923	Cathepsin L2	Postdysentery joint disease	Inverse variance weighted	11	-0.646483	0.328706	0.0492123	-1.29075	-0.00221814	0.523885	0.275065	0.997784	24.6843	0.723276	0.422447	0.734	0.729982
1924	Cathepsin L2	Postdysentery joint disease	MR Egger	11	-1.35073	0.900154	0.167709	-3.11503	0.41357	0.259051	0.044377	1.51221		0.707853			1
1925	Cathepsin L2	Postdysentery joint disease	Weighted median	11	-0.489624	0.427446	0.252017	-1.32742	0.34817	0.612857	0.265161	1.41647					1
1926	Cathepsin L2	Postdysentery joint disease	Simple mode	11	-0.9786	0.704944	0.195224	-2.36029	0.40309	0.375837	0.0943929	1.49644					1
1927	Cathepsin L2	Postdysentery joint disease	Weighted mode	11	-0.836232	0.598723	0.192729	-2.00973	0.337265	0.43334	0.134025	1.40111					1
1928	Cathepsin L2	Postdysentery joint disease	Maximum likelihood	11	-0.646492	0.333945	0.0528773	-1.30103	0.00804075	0.52388	0.272253	1.00807					0.672297
1929	Cathepsin Z	Postdysentery joint disease	Inverse variance weighted	13	0.317551	0.204103	0.119747	-0.0824912	0.717593	1.37376	0.92082	2.04949	53.4584	0.714132	0.820888	0.772	0.968864
1930	Cathepsin Z	Postdysentery joint disease	MR Egger	13	0.375805	0.323686	0.270211	-0.25862	1.01023	1.45616	0.772117	2.74623		0.639002			1
1931	Cathepsin Z	Postdysentery joint disease	Weighted median	13	0.26279	0.263863	0.319282	-0.254381	0.779962	1.30055	0.775396	2.18139					0.957846
1932	Cathepsin Z	Postdysentery joint disease	Simple mode	13	0.446228	0.420198	0.309165	-0.377361	1.26982	1.56241	0.685669	3.5602					1
1933	Cathepsin Z	Postdysentery joint disease	Weighted mode	13	0.261123	0.252071	0.32067	-0.232936	0.755182	1.29839	0.792204	2.128					1
1934	Cathepsin Z	Postdysentery joint disease	Maximum likelihood	13	0.315481	0.205821	0.125325	-0.0879267	0.71889	1.37092	0.915828	2.05215					0.743597
1935	Cathepsin B	Psoriatic arthropathy	Inverse variance weighted	17	-0.0778247	0.0695343	0.263043	-0.214112	0.0584626	0.925127	0.807258	1.06021	35.5021	0.316527	0.130628	0.364	0.975451
1936	Cathepsin B	Psoriatic arthropathy	MR Egger	17	0.145374	0.154552	0.361802	-0.157547	0.448295	1.15647	0.854237	1.56564		0.416978			0.985216
1937	Cathepsin B	Psoriatic arthropathy	Weighted median	17	-0.0652612	0.0972315	0.502097	-0.255835	0.125312	0.936823	0.77427	1.1335					0.987457
1938	Cathepsin B	Psoriatic arthropathy	Simple mode	17	-0.104652	0.157056	0.51469	-0.412482	0.203177	0.900638	0.662005	1.22529					1
1939	Cathepsin B	Psoriatic arthropathy	Weighted mode	17	-0.0715699	0.107985	0.516908	-0.28322	0.14008	0.930931	0.753354	1.15037					1
1940	Cathepsin B	Psoriatic arthropathy	Maximum likelihood	17	-0.0769604	0.0663619	0.246168	-0.20703	0.053109	0.925926	0.812995	1.05454					0.912873
1941	Cathepsin F	Psoriatic arthropathy	Inverse variance weighted	12	0.0945099	0.0765722	0.217107	-0.0555717	0.244591	1.09912	0.945944	1.2771	36.6058	0.227318	0.366168	0.269	1
1942	Cathepsin F	Psoriatic arthropathy	MR Egger	12	-0.0598073	0.18027	0.746915	-0.413136	0.293521	0.941946	0.661572	1.34114		0.226833			0.972088
1943	Cathepsin F	Psoriatic arthropathy	Weighted median	12	0.0300205	0.0967871	0.756431	-0.159682	0.219723	1.03048	0.852415	1.24573					0.991765
1944	Cathepsin F	Psoriatic arthropathy	Simple mode	12	0.00755534	0.157287	0.962549	-0.300726	0.315837	1.00758	0.74028	1.37141					1
1945	Cathepsin F	Psoriatic arthropathy	Weighted mode	12	0.021883	0.125934	0.865206	-0.224948	0.268714	1.02212	0.798558	1.30828					1
1946	Cathepsin F	Psoriatic arthropathy	Maximum likelihood	12	0.0973104	0.0688703	0.15767	-0.0376755	0.232296	1.1022	0.963025	1.26149					0.82545
1947	Cathepsin G	Psoriatic arthropathy	Inverse variance weighted	13	0.0865676	0.0762079	0.255982	-0.0628	0.235935	1.09043	0.939131	1.26609	22.9823	0.453322	0.376266	0.508	0.990539
1948	Cathepsin G	Psoriatic arthropathy	MR Egger	13	0.203814	0.148333	0.196782	-0.0869184	0.494546	1.22607	0.916752	1.63975		0.438998			1
1949	Cathepsin G	Psoriatic arthropathy	Weighted median	13	0.111639	0.11145	0.316489	-0.106803	0.330081	1.11811	0.898703	1.39108					0.982781
1950	Cathepsin G	Psoriatic arthropathy	Simple mode	13	0.0487594	0.158827	0.764107	-0.262541	0.36006	1.04997	0.769095	1.43342					1
1951	Cathepsin G	Psoriatic arthropathy	Weighted mode	13	0.0888829	0.117543	0.464131	-0.141501	0.319267	1.09295	0.868054	1.37612					1
1952	Cathepsin G	Psoriatic arthropathy	Maximum likelihood	13	0.089132	0.0774759	0.249959	-0.0627208	0.240985	1.09322	0.939206	1.2725					0.908016
1953	Cathepsin E	Psoriatic arthropathy	Inverse variance weighted	10	0.107298	0.0713727	0.13275	-0.0325926	0.247188	1.11327	0.967933	1.28042	21.973	0.497858	0.372383	0.442	0.945178
1954	Cathepsin E	Psoriatic arthropathy	MR Egger	10	0.0166223	0.119597	0.892897	-0.217789	0.251033	1.01676	0.804295	1.28535		0.486681			0.987767
1955	Cathepsin E	Psoriatic arthropathy	Weighted median	10	0.10501	0.104614	0.315479	-0.100032	0.310053	1.11072	0.904808	1.3635					0.997139
1956	Cathepsin E	Psoriatic arthropathy	Simple mode	10	0.0748715	0.154945	0.640483	-0.228821	0.378564	1.07775	0.795471	1.46019					1
1957	Cathepsin E	Psoriatic arthropathy	Weighted mode	10	0.123641	0.145617	0.417846	-0.161768	0.409049	1.13161	0.850639	1.50539					1
1958	Cathepsin E	Psoriatic arthropathy	Maximum likelihood	10	0.113891	0.0737041	0.122288	-0.0305694	0.258351	1.12063	0.969893	1.29479					0.777401
1959	Cathepsin H	Psoriatic arthropathy	Inverse variance weighted	11	0.0251244	0.0473661	0.595814	-0.0677132	0.117962	1.02544	0.934528	1.1252	126.485	0.259848	0.749989	0.442	0.97298
1960	Cathepsin H	Psoriatic arthropathy	MR Egger	11	0.0405129	0.0682394	0.567341	-0.0932364	0.174262	1.04134	0.910978	1.19037		0.199986			0.904679
1961	Cathepsin H	Psoriatic arthropathy	Weighted median	11	0.00839253	0.0472867	0.85913	-0.0842894	0.101074	1.00843	0.919165	1.10636					0.993895
1962	Cathepsin H	Psoriatic arthropathy	Simple mode	11	0.036203	0.123453	0.775325	-0.205766	0.278172	1.03687	0.814024	1.32071					1
1963	Cathepsin H	Psoriatic arthropathy	Weighted mode	11	0.00904718	0.0491918	0.857755	-0.0873687	0.105463	1.00909	0.916339	1.11123					1
1964	Cathepsin H	Psoriatic arthropathy	Maximum likelihood	11	0.025365	0.0427812	0.553247	-0.0584862	0.109216	1.02569	0.943191	1.1154					0.903468
1965	Cathepsin O	Psoriatic arthropathy	Inverse variance weighted	12	0.0352338	0.0905634	0.697238	-0.142271	0.212738	1.03586	0.867387	1.23706	23.2138	0.365694	0.612419	0.399	0.992868
1966	Cathepsin O	Psoriatic arthropathy	MR Egger	12	-0.066965	0.216745	0.763694	-0.491785	0.357855	0.935228	0.611534	1.43026		0.308874			0.965528
1967	Cathepsin O	Psoriatic arthropathy	Weighted median	12	-0.0374926	0.12065	0.755987	-0.273966	0.198981	0.963202	0.760358	1.22016					0.998579
1968	Cathepsin O	Psoriatic arthropathy	Simple mode	12	-0.0201226	0.174574	0.91031	-0.362287	0.322042	0.980078	0.696083	1.37994					1
1969	Cathepsin O	Psoriatic arthropathy	Weighted mode	12	-0.0626756	0.160625	0.703839	-0.3775	0.252149	0.939248	0.685573	1.28679					1
1970	Cathepsin O	Psoriatic arthropathy	Maximum likelihood	12	0.0369603	0.0889028	0.677601	-0.137289	0.21121	1.03765	0.871718	1.23517					0.957246
1971	Cathepsin S	Psoriatic arthropathy	Inverse variance weighted	24	0.0787453	0.064661	0.223293	-0.0479903	0.205481	1.08193	0.953143	1.22812	39.7152	0.0796124	0.211489	0.089	1
1972	Cathepsin S	Psoriatic arthropathy	MR Egger	24	0.195036	0.11059	0.0916866	-0.0217214	0.411793	1.21535	0.978513	1.50952		0.100966			1
1973	Cathepsin S	Psoriatic arthropathy	Weighted median	24	0.0998297	0.0809532	0.217509	-0.0588385	0.258498	1.10498	0.942859	1.29498					1
1974	Cathepsin S	Psoriatic arthropathy	Simple mode	24	0.0851855	0.183905	0.647572	-0.275269	0.44564	1.08892	0.759368	1.56149					1
1975	Cathepsin S	Psoriatic arthropathy	Weighted mode	24	0.0987902	0.0918006	0.293024	-0.0811389	0.278719	1.10383	0.922066	1.32144					1
1976	Cathepsin S	Psoriatic arthropathy	Maximum likelihood	24	0.0824859	0.0551963	0.135069	-0.0256989	0.190671	1.08598	0.974629	1.21006					0.751319
1977	Cathepsin L2	Psoriatic arthropathy	Inverse variance weighted	11	-0.0133031	0.100274	0.894456	-0.20984	0.183234	0.986785	0.810714	1.2011	24.6843	0.391623	0.362025	0.389	0.964929
1978	Cathepsin L2	Psoriatic arthropathy	MR Egger	11	0.230949	0.273564	0.420418	-0.305236	0.767135	1.2598	0.736949	2.15359		0.384536			0.907487
1979	Cathepsin L2	Psoriatic arthropathy	Weighted median	11	-0.0149709	0.132178	0.909822	-0.274039	0.244098	0.985141	0.760302	1.27647					0.964302
1980	Cathepsin L2	Psoriatic arthropathy	Simple mode	11	-0.127789	0.209894	0.556217	-0.53918	0.283603	0.880039	0.583226	1.32791					1
1981	Cathepsin L2	Psoriatic arthropathy	Weighted mode	11	-0.162908	0.192917	0.418164	-0.541024	0.215209	0.84967	0.582152	1.24012					1
1982	Cathepsin L2	Psoriatic arthropathy	Maximum likelihood	11	-0.013851	0.0995431	0.889335	-0.208956	0.181254	0.986244	0.811431	1.19872					0.942272
1983	Cathepsin Z	Psoriatic arthropathy	Inverse variance weighted	13	0.0626576	0.0609422	0.30388	-0.0567891	0.182104	1.06466	0.944793	1.19974	53.4584	0.973405	0.963792	0.972	0.983467
1984	Cathepsin Z	Psoriatic arthropathy	MR Egger	13	0.0591559	0.0969514	0.554152	-0.130869	0.249181	1.06094	0.877333	1.28297		0.954212			0.934142
1985	Cathepsin Z	Psoriatic arthropathy	Weighted median	13	0.0830766	0.0812971	0.306833	-0.0762656	0.242419	1.08663	0.92657	1.27433					1
1986	Cathepsin Z	Psoriatic arthropathy	Simple mode	13	0.0835979	0.122424	0.507666	-0.156353	0.323548	1.08719	0.855258	1.38202					1
1987	Cathepsin Z	Psoriatic arthropathy	Weighted mode	13	0.0635052	0.0857844	0.473361	-0.104632	0.231643	1.06556	0.900656	1.26067					1
1988	Cathepsin Z	Psoriatic arthropathy	Maximum likelihood	13	0.0623495	0.0612487	0.308691	-0.0576979	0.182397	1.06433	0.943935	1.20009					0.886241
1989	Cathepsin B	Lumbago	Inverse variance weighted	3	-0.000356037	0.000280454	0.204261	-0.000905727	0.000193652	0.999644	0.999095	1.00019	95.8722	0.7174	0.586335		1
1990	Cathepsin B	Lumbago	MR Egger	3	-0.000716143	0.000550675	0.417315	-0.00179547	0.000363181	0.999284	0.998206	1.00036		0.768221			0.911911
1991	Cathepsin B	Lumbago	Weighted median	3	-0.000387553	0.000290734	0.182528	-0.000957392	0.000182287	0.999613	0.999043	1.00018					1
1992	Cathepsin B	Lumbago	Simple mode	3	-0.000204551	0.000481223	0.712155	-0.00114775	0.000738646	0.999795	0.998853	1.00074					1
1993	Cathepsin B	Lumbago	Weighted mode	3	-0.000425284	0.000273413	0.260097	-0.000961174	0.000110606	0.999575	0.999039	1.00011					1
1994	Cathepsin B	Lumbago	Maximum likelihood	3	-0.000356901	0.000281603	0.205016	-0.000908844	0.000195042	0.999643	0.999092	1.0002					0.935715
1995	Cathepsin F	Lumbago	Inverse variance weighted	5	4.79e-05	0.000496778	0.923209	-0.0009258	0.00102157	1.00005	0.999075	1.00102	55.4361	0.0142109	0.606164	0.046	0.98402
1996	Cathepsin F	Lumbago	MR Egger	5	0.000952158	0.00166677	0.607816	-0.00231471	0.00421903	1.00095	0.997688	1.00423		0.0105399			0.935508
1997	Cathepsin F	Lumbago	Weighted median	5	4.79e-05	0.000366981	0.896167	-0.00067139	0.000767176	1.00005	0.999329	1.00077					0.973138
1998	Cathepsin F	Lumbago	Simple mode	5	4.01e-05	0.000676913	0.955651	-0.00128669	0.00136681	1.00004	0.998714	1.00137					1
[truncated: 28 more rows]

## Sheet: Sheet2
The Mendelian Randomization Analysis Results of 38 Types of BMJD and 9 Kinds of Cathepsins
	Exposure	Outcome	method	nsnp	b	se	pval	lo_ci	up_ci	or	or_lci95	or_uci95	F	Q_pval	MR-egger pval	MR-PRESSO Pvalue	adjustP
1	Gout	Cathepsin B	Inverse variance weighted	21	-0.0363715	0.0238071	0.126573	-0.0830335	0.0102905	0.964282	0.92032	1.01034	43.0644	0.841693	0.254458	0.828	1
2	Gout	Cathepsin B	MR Egger	21	-0.0650245	0.0340778	0.0716036	-0.131817	0.00176804	0.937045	0.876501	1.00177		0.868074			1
3	Gout	Cathepsin B	Weighted median	21	-0.0551256	0.0332396	0.0972303	-0.120275	0.010024	0.946366	0.886676	1.01007					1
4	Gout	Cathepsin B	Simple mode	21	-0.0540369	0.0526059	0.316589	-0.157144	0.0490706	0.947397	0.854581	1.05029					1
5	Gout	Cathepsin B	Weighted mode	21	-0.0714402	0.0363975	0.063733	-0.142779	-0.000101139	0.931052	0.866945	0.999899					1
6	Gout	Cathepsin B	Maximum likelihood	21	-0.0364084	0.0237153	0.124729	-0.0828904	0.0100737	0.964246	0.920452	1.01012					0.962192
7	Gout	Cathepsin F	Inverse variance weighted	21	0.0149677	0.0435361	0.730997	-0.0703631	0.100299	1.01508	0.932055	1.1055	43.0644	5.75e-07	0.0459812	0.104	1
8	Gout	Cathepsin F	MR Egger	21	-0.0727803	0.0574272	0.220345	-0.185338	0.0397771	0.929805	0.830824	1.04058		3.34e-05			1
9	Gout	Cathepsin F	Weighted median	21	-0.0405523	0.03166	0.20024	-0.102606	0.0215013	0.960259	0.902483	1.02173					1
10	Gout	Cathepsin F	Simple mode	21	-0.0490601	0.0547113	0.380542	-0.156294	0.058174	0.952124	0.855308	1.0599					1
11	Gout	Cathepsin F	Weighted mode	21	-0.0450001	0.0279843	0.123498	-0.0998494	0.00984923	0.955997	0.904974	1.0099					1
12	Gout	Cathepsin F	Maximum likelihood	21	0.0160144	0.0247444	0.517505	-0.0324845	0.0645134	1.01614	0.968037	1.06664					1
13	Gout	Cathepsin G	Inverse variance weighted	21	0.0235253	0.0262392	0.369949	-0.0279036	0.0749541	1.0238	0.972482	1.07783	43.0644	0.229902	0.160267	0.308	1
14	Gout	Cathepsin G	MR Egger	21	-0.0146922	0.036544	0.69214	-0.0863185	0.056934	0.985415	0.917302	1.05859		0.292448			0.958348
15	Gout	Cathepsin G	Weighted median	21	0.0166888	0.0332199	0.615405	-0.0484222	0.0817998	1.01683	0.952731	1.08524					1
16	Gout	Cathepsin G	Simple mode	21	0.016715	0.0513656	0.748249	-0.0839615	0.117391	1.01686	0.919467	1.12456					1
17	Gout	Cathepsin G	Weighted mode	21	0.0224977	0.0304625	0.468767	-0.0372088	0.0822041	1.02275	0.963475	1.08568					1
18	Gout	Cathepsin G	Maximum likelihood	21	0.0237333	0.0240879	0.324487	-0.0234789	0.0709455	1.02402	0.976795	1.07352					1
19	Gout	Cathepsin E	Inverse variance weighted	21	0.00700575	0.0337144	0.835388	-0.0590745	0.073086	1.00703	0.942637	1.07582	43.0644	0.00481074	0.664048	0.009	1
20	Gout	Cathepsin E	MR Egger	21	-0.00855144	0.0492717	0.864049	-0.105124	0.088021	0.991485	0.900213	1.09201		0.0035582			0.992738
21	Gout	Cathepsin E	Weighted median	21	-0.0337347	0.0375582	0.369081	-0.107349	0.0398795	0.966828	0.898212	1.04069					1
22	Gout	Cathepsin E	Simple mode	21	-0.0415351	0.0726423	0.573845	-0.183914	0.100844	0.959316	0.832007	1.1061					1
23	Gout	Cathepsin E	Weighted mode	21	-0.0210397	0.0315079	0.51192	-0.0827951	0.0407157	0.97918	0.92054	1.04156					1
24	Gout	Cathepsin E	Maximum likelihood	21	0.00725444	0.0245404	0.767526	-0.0408446	0.0553535	1.00728	0.959978	1.05691					0.994713
25	Gout	Cathepsin H	Inverse variance weighted	21	-0.0370837	0.0337569	0.271963	-0.103247	0.0290797	0.963595	0.901904	1.02951	43.0644	0.00463616	0.0365248	0.006	1
26	Gout	Cathepsin H	MR Egger	21	-0.107989	0.0440532	0.0240815	-0.194333	-0.0216448	0.897637	0.823383	0.978588		0.0330076			1
27	Gout	Cathepsin H	Weighted median	21	-0.0692748	0.0340255	0.0417536	-0.135965	-0.00258484	0.93307	0.872873	0.997418					1
28	Gout	Cathepsin H	Simple mode	21	-0.0380572	0.0601564	0.534137	-0.155964	0.0798493	0.962658	0.85559	1.08312					1
29	Gout	Cathepsin H	Weighted mode	21	-0.0709768	0.0304646	0.0304048	-0.130687	-0.0112661	0.931484	0.877492	0.988797					1
30	Gout	Cathepsin H	Maximum likelihood	21	-0.0375334	0.0239084	0.116443	-0.0843938	0.0093271	0.963162	0.919069	1.00937					0.943185
31	Gout	Cathepsin O	Inverse variance weighted	21	-0.00503247	0.0278304	0.856504	-0.05958	0.049515	0.99498	0.94216	1.05076	43.0644	0.126514	0.484577	0.165	1
32	Gout	Cathepsin O	MR Egger	21	-0.025617	0.040346	0.533045	-0.104695	0.0534612	0.974708	0.900599	1.05492		0.114127			1
33	Gout	Cathepsin O	Weighted median	21	-0.0301639	0.035545	0.396097	-0.0998322	0.0395043	0.970286	0.904989	1.04029					1
34	Gout	Cathepsin O	Simple mode	21	-0.0140022	0.0544725	0.799766	-0.120768	0.092764	0.986095	0.886239	1.0972					1
35	Gout	Cathepsin O	Weighted mode	21	-0.0223384	0.029609	0.459374	-0.080372	0.0356953	0.977909	0.922773	1.03634					1
36	Gout	Cathepsin O	Maximum likelihood	21	-0.00512461	0.0241754	0.832126	-0.0525084	0.0422592	0.994888	0.948846	1.04316					1
37	Gout	Cathepsin S	Inverse variance weighted	21	0.00808771	0.0238116	0.734117	-0.038583	0.0547585	1.00812	0.962152	1.05629	43.0644	0.701646	0.295094	0.706	1
38	Gout	Cathepsin S	MR Egger	21	0.0343592	0.0340932	0.326213	-0.0324635	0.101182	1.03496	0.968058	1.10648		0.717472			1
39	Gout	Cathepsin S	Weighted median	21	-0.000479887	0.0335601	0.988591	-0.0662577	0.0652979	0.99952	0.93589	1.06748					1
40	Gout	Cathepsin S	Simple mode	21	0.0224402	0.0510011	0.664659	-0.0775219	0.122402	1.02269	0.925407	1.13021					1
41	Gout	Cathepsin S	Weighted mode	21	0.00784486	0.0302164	0.797809	-0.0513793	0.067069	1.00788	0.949918	1.06937					1
42	Gout	Cathepsin S	Maximum likelihood	21	0.0081856	0.0239656	0.732685	-0.038787	0.0551582	1.00822	0.961956	1.05671					1
43	Gout	Cathepsin L2	Inverse variance weighted	21	0.00541678	0.0238104	0.820038	-0.0412515	0.0520851	1.00543	0.959588	1.05347	43.0644	0.725096	0.332796	0.759	1
44	Gout	Cathepsin L2	MR Egger	21	-0.0188331	0.0340928	0.587109	-0.085655	0.0479887	0.981343	0.917911	1.04916		0.730499			1
45	Gout	Cathepsin L2	Weighted median	21	0.0112754	0.0330762	0.733186	-0.053554	0.0761047	1.01134	0.947855	1.07908					1
46	Gout	Cathepsin L2	Simple mode	21	0.02905	0.0552397	0.604747	-0.0792198	0.13732	1.02948	0.923837	1.1472					1
47	Gout	Cathepsin L2	Weighted mode	21	-0.000793826	0.0337079	0.981445	-0.0668614	0.0652737	0.999206	0.935325	1.06745					1
48	Gout	Cathepsin L2	Maximum likelihood	21	0.00520903	0.0241954	0.829541	-0.042214	0.0526321	1.00522	0.958665	1.05404					1
49	Gout	Cathepsin Z	Inverse variance weighted	21	-0.0170839	0.027248	0.530674	-0.07049	0.0363222	0.983061	0.931937	1.03699	43.0644	0.159462	0.656221	0.199	1
50	Gout	Cathepsin Z	MR Egger	21	-0.0299685	0.0398114	0.460819	-0.107999	0.0480618	0.970476	0.897629	1.04924		0.13254			1
51	Gout	Cathepsin Z	Weighted median	21	-0.028195	0.0311314	0.365107	-0.0892126	0.0328226	0.972199	0.914651	1.03337					1
52	Gout	Cathepsin Z	Simple mode	21	0.00557787	0.0510635	0.914106	-0.0945067	0.105662	1.00559	0.909822	1.11145					1
53	Gout	Cathepsin Z	Weighted mode	21	-0.0313169	0.0306741	0.319467	-0.0914383	0.0288044	0.969168	0.912618	1.02922					1
54	Gout	Cathepsin Z	Maximum likelihood	21	-0.0172353	0.0240149	0.472947	-0.0643044	0.0298338	0.982912	0.937719	1.03028					1
55	Purulent arthritis	Cathepsin B	Inverse variance weighted	7	-0.0246411	0.0345814	0.476122	-0.0924206	0.0431384	0.97566	0.911722	1.04408	27.7057	0.477522	0.645439	0.554	1
56	Purulent arthritis	Cathepsin B	MR Egger	7	-0.003528	0.0559096	0.95213	-0.113111	0.106055	0.996478	0.893052	1.11188		0.382676			0.988751
57	Purulent arthritis	Cathepsin B	Weighted median	7	-0.0369823	0.0475841	0.437042	-0.130247	0.0562826	0.963693	0.877878	1.0579					0.997194
58	Purulent arthritis	Cathepsin B	Simple mode	7	-0.0688198	0.0617799	0.307923	-0.189908	0.0522687	0.933495	0.827035	1.05366					1
59	Purulent arthritis	Cathepsin B	Weighted mode	7	-0.0535016	0.053889	0.359137	-0.159124	0.0521208	0.947904	0.852891	1.0535					1
60	Purulent arthritis	Cathepsin B	Maximum likelihood	7	-0.0250896	0.0347919	0.470827	-0.0932817	0.0431025	0.975223	0.910937	1.04404					1
61	Purulent arthritis	Cathepsin F	Inverse variance weighted	7	0.0175073	0.0345699	0.612553	-0.0502498	0.0852644	1.01766	0.950992	1.089	27.7057	0.685496	0.418674	0.762	1
62	Purulent arthritis	Cathepsin F	MR Egger	7	0.0544969	0.0543886	0.362344	-0.0521048	0.161099	1.05601	0.949229	1.1748		0.675524			1
63	Purulent arthritis	Cathepsin F	Weighted median	7	0.0328698	0.0426435	0.440822	-0.0507114	0.116451	1.03342	0.950553	1.1235					0.978263
64	Purulent arthritis	Cathepsin F	Simple mode	7	0.0470545	0.0576102	0.445268	-0.0658615	0.159971	1.04818	0.936261	1.17348					1
65	Purulent arthritis	Cathepsin F	Weighted mode	7	0.0360654	0.0517846	0.51221	-0.0654324	0.137563	1.03672	0.936662	1.14747					1
66	Purulent arthritis	Cathepsin F	Maximum likelihood	7	0.017752	0.0348135	0.610109	-0.0504824	0.0859865	1.01791	0.950771	1.08979					0.968996
67	Purulent arthritis	Cathepsin G	Inverse variance weighted	7	-0.0104056	0.0345699	0.763413	-0.0781627	0.0573515	0.989648	0.924814	1.05903	27.7057	0.559533	0.79388	0.588	1
68	Purulent arthritis	Cathepsin G	MR Egger	7	-0.0219778	0.0543886	0.702851	-0.12858	0.0846238	0.978262	0.879344	1.08831		0.440494			0.956823
69	Purulent arthritis	Cathepsin G	Weighted median	7	-0.0421668	0.0442237	0.340342	-0.128845	0.0445117	0.95871	0.87911	1.04552					1
70	Purulent arthritis	Cathepsin G	Simple mode	7	-0.0303617	0.063603	0.649996	-0.155024	0.0943002	0.970095	0.856395	1.09889					1
71	Purulent arthritis	Cathepsin G	Weighted mode	7	-0.0249792	0.0550495	0.665953	-0.132876	0.0829178	0.97533	0.875574	1.08645					1
72	Purulent arthritis	Cathepsin G	Maximum likelihood	7	-0.0106111	0.034882	0.760975	-0.0789798	0.0577576	0.989445	0.924059	1.05946					1
73	Purulent arthritis	Cathepsin E	Inverse variance weighted	7	0.0586504	0.0368325	0.111305	-0.0135414	0.130842	1.0604	0.98655	1.13979	27.7057	0.338735	0.530033	0.374	1
74	Purulent arthritis	Cathepsin E	MR Egger	7	0.0902981	0.0607871	0.197552	-0.0288447	0.209441	1.0945	0.971567	1.23299		0.283311			1
75	Purulent arthritis	Cathepsin E	Weighted median	7	0.0625761	0.0467446	0.180674	-0.0290432	0.154195	1.06458	0.971374	1.16672					1
76	Purulent arthritis	Cathepsin E	Simple mode	7	0.0732307	0.0723365	0.350435	-0.0685488	0.21501	1.07598	0.933748	1.23987					1
77	Purulent arthritis	Cathepsin E	Weighted mode	7	0.0766709	0.0674891	0.299267	-0.0556077	0.20895	1.07969	0.94591	1.23238					1
78	Purulent arthritis	Cathepsin E	Maximum likelihood	7	0.060418	0.0355706	0.0894066	-0.00930044	0.130136	1.06228	0.990743	1.13898					1
79	Purulent arthritis	Cathepsin H	Inverse variance weighted	7	0.0411248	0.0345904	0.234476	-0.0266724	0.108922	1.04198	0.97368	1.11508	27.7057	0.427485	0.347589	0.427	1
80	Purulent arthritis	Cathepsin H	MR Egger	7	-0.00242111	0.0544287	0.966242	-0.109101	0.104259	0.997582	0.896639	1.10989		0.429699			0.990704
81	Purulent arthritis	Cathepsin H	Weighted median	7	0.0217876	0.0468666	0.642013	-0.0700709	0.113646	1.02203	0.932328	1.12036					1
82	Purulent arthritis	Cathepsin H	Simple mode	7	0.0116162	0.0721913	0.877446	-0.129879	0.153111	1.01168	0.878202	1.16545					1
83	Purulent arthritis	Cathepsin H	Weighted mode	7	0.000170396	0.0578834	0.997747	-0.113281	0.113622	1.00017	0.8929	1.12033					1
84	Purulent arthritis	Cathepsin H	Maximum likelihood	7	0.0429379	0.0359276	0.232039	-0.0274802	0.113356	1.04387	0.972894	1.12003					1
85	Purulent arthritis	Cathepsin O	Inverse variance weighted	7	0.00284684	0.0413017	0.945047	-0.0781044	0.0837981	1.00285	0.924868	1.08741	27.7057	0.199843	0.477071	0.265	1
86	Purulent arthritis	Cathepsin O	MR Egger	7	0.0427979	0.0673473	0.553057	-0.0892027	0.174799	1.04373	0.91466	1.19101		0.176188			1
87	Purulent arthritis	Cathepsin O	Weighted median	7	-0.00469033	0.0471936	0.920833	-0.0971897	0.0878091	0.995321	0.907384	1.09178					1
88	Purulent arthritis	Cathepsin O	Simple mode	7	0.0132059	0.063607	0.842395	-0.111464	0.137876	1.01329	0.894524	1.14783					1
89	Purulent arthritis	Cathepsin O	Weighted mode	7	0.00568415	0.0574569	0.924417	-0.106931	0.1183	1.0057	0.898587	1.12558					1
90	Purulent arthritis	Cathepsin O	Maximum likelihood	7	0.00292904	0.0350382	0.933378	-0.0657459	0.071604	1.00293	0.936369	1.07423					0.994784
91	Purulent arthritis	Cathepsin S	Inverse variance weighted	7	-0.0340567	0.0430191	0.428557	-0.118374	0.0502608	0.966517	0.888364	1.05155	27.7057	0.157892	0.098882	0.227	1
92	Purulent arthritis	Cathepsin S	MR Egger	7	-0.11997	0.0549795	0.0809004	-0.22773	-0.0122099	0.886947	0.79634	0.987864		0.402979			1
93	Purulent arthritis	Cathepsin S	Weighted median	7	-0.0460142	0.0470298	0.327874	-0.138193	0.0461642	0.955028	0.870931	1.04725					1
94	Purulent arthritis	Cathepsin S	Simple mode	7	-0.0631639	0.0664759	0.378709	-0.193457	0.0671288	0.93879	0.824106	1.06943					1
95	Purulent arthritis	Cathepsin S	Weighted mode	7	-0.049929	0.0552658	0.40111	-0.15825	0.0583919	0.951297	0.853636	1.06013					1
96	Purulent arthritis	Cathepsin S	Maximum likelihood	7	-0.0347189	0.0351414	0.323164	-0.103596	0.0341582	0.965877	0.90159	1.03475					1
97	Purulent arthritis	Cathepsin L2	Inverse variance weighted	7	-0.0207781	0.0345904	0.548048	-0.0885753	0.0470192	0.979436	0.915234	1.04814	27.7057	0.444286	0.308982	0.489	1
98	Purulent arthritis	Cathepsin L2	MR Egger	7	0.026793	0.0544287	0.643387	-0.0798873	0.133473	1.02716	0.92322	1.14279		0.475471			0.992654
99	Purulent arthritis	Cathepsin L2	Weighted median	7	-0.00934225	0.0451972	0.836244	-0.0979288	0.0792443	0.990701	0.906713	1.08247					1
100	Purulent arthritis	Cathepsin L2	Simple mode	7	-0.0775435	0.0675139	0.294459	-0.209871	0.0547838	0.925387	0.810689	1.05631					1
101	Purulent arthritis	Cathepsin L2	Weighted mode	7	-0.0276336	0.0599009	0.660818	-0.145039	0.0897721	0.972745	0.864988	1.09392					1
102	Purulent arthritis	Cathepsin L2	Maximum likelihood	7	-0.0211298	0.0349596	0.545573	-0.0896506	0.0473909	0.979092	0.914251	1.04853					1
103	Purulent arthritis	Cathepsin Z	Inverse variance weighted	7	0.00964683	0.0345667	0.780185	-0.058104	0.0773977	1.00969	0.943552	1.08047	27.7057	0.661808	0.314465	0.682	1
104	Purulent arthritis	Cathepsin Z	MR Egger	7	-0.0372905	0.0543884	0.523434	-0.143892	0.0693108	0.963396	0.865982	1.07177		0.721494			1
105	Purulent arthritis	Cathepsin Z	Weighted median	7	0.0141385	0.0455743	0.756387	-0.0751872	0.103464	1.01424	0.92757	1.10901					1
106	Purulent arthritis	Cathepsin Z	Simple mode	7	0.034973	0.0660032	0.615229	-0.0943933	0.164339	1.03559	0.909925	1.17861					1
107	Purulent arthritis	Cathepsin Z	Weighted mode	7	0.00111368	0.0580931	0.985327	-0.112749	0.114976	1.00111	0.893375	1.12185					1
108	Purulent arthritis	Cathepsin Z	Maximum likelihood	7	0.00982846	0.0349046	0.778265	-0.0585846	0.0782415	1.00988	0.943098	1.08138					1
109	Cervical spondylopathy	Cathepsin B	Inverse variance weighted	3	-9.75074	22.6635	0.667021	-54.1712	34.6697	5.83e-05	2.98e-24	1139890000000000	21.9001	0.199232	0.333383		1
110	Cervical spondylopathy	Cathepsin B	MR Egger	3	235.981	143.016	0.346866	-44.3306	516.292	3.06e+102	5.59e-20	1.67e+224		0.633275			1
111	Cervical spondylopathy	Cathepsin B	Weighted median	3	0.335393	24.5909	0.989118	-47.8628	48.5336	1.39849	1.63e-21	1.2e+21					1
112	Cervical spondylopathy	Cathepsin B	Simple mode	3	6.98312	31.1861	0.843615	-54.1417	68.108	1078.28	3.07e-24	3.79e+29					1
113	Cervical spondylopathy	Cathepsin B	Weighted mode	3	8.83783	32.24	0.809706	-54.3526	72.0282	6890	2.48e-24	1.91e+31					1
114	Cervical spondylopathy	Cathepsin B	Maximum likelihood	3	-10.2637	18.3543	0.576025	-46.2382	25.7107	3.49e-05	8.3e-21	146560000000					1
115	Cervical spondylopathy	Cathepsin F	Inverse variance weighted	3	6.83344	19.0089	0.719232	-30.4241	44.091	928.376	6.12e-14	1.41e+19	21.9001	0.321441	0.815826		1
116	Cervical spondylopathy	Cathepsin F	MR Egger	3	67.8225	206.516	0.79799	-336.948	472.593	2.85e+29	4.63e-147	1.76e+205		0.148738			0.957588
117	Cervical spondylopathy	Cathepsin F	Weighted median	3	-7.01207	23.8232	0.7685	-53.7056	39.6814	0.000900939	4.74e-24	1.71168e+17					1
118	Cervical spondylopathy	Cathepsin F	Simple mode	3	-10.3807	26.7827	0.735679	-62.8748	42.1133	3.1e-05	4.94e-28	1.94795e+18					1
119	Cervical spondylopathy	Cathepsin F	Weighted mode	3	-10.6164	26.7042	0.729376	-62.9566	41.7238	2.45e-05	4.55e-28	1.31956e+18					1
120	Cervical spondylopathy	Cathepsin F	Maximum likelihood	3	7.07296	18.1855	0.697325	-28.5707	42.7166	1179.63	3.91e-13	3.56105e+18					0.990936
121	Cervical spondylopathy	Cathepsin G	Inverse variance weighted	3	-4.25039	20.758	0.837761	-44.9362	36.4354	0.0142587	3.05e-20	6663230000000000	21.9001	0.258357	0.357942		1
122	Cervical spondylopathy	Cathepsin G	MR Egger	3	-229.453	143.016	0.354832	-509.764	50.8583	2.24e-100	4.09e-222	1.22e+22		0.66455			1
123	Cervical spondylopathy	Cathepsin G	Weighted median	3	-15.2522	23.4682	0.51575	-61.25	30.7455	2.38e-07	2.51e-27	22521500000000					1
124	Cervical spondylopathy	Cathepsin G	Simple mode	3	-25.2535	29.71	0.484848	-83.485	32.978	1.08e-11	5.53e-37	209971000000000					1
125	Cervical spondylopathy	Cathepsin G	Weighted mode	3	-24.2707	28.2164	0.480345	-79.5749	31.0335	2.88e-11	2.76e-35	30037900000000					1
126	Cervical spondylopathy	Cathepsin G	Maximum likelihood	3	-4.43264	18.2344	0.807934	-40.1721	31.3068	0.0118831	3.58e-18	39479100000000					1
127	Cervical spondylopathy	Cathepsin E	Inverse variance weighted	3	-9.58993	17.8431	0.590951	-44.5625	25.3826	6.84e-05	4.43e-20	105567000000	21.9001	0.592285	0.492612		1
128	Cervical spondylopathy	Cathepsin E	MR Egger	3	135.641	143.016	0.516845	-144.671	415.952	8.09e+58	1.48e-63	4.42e+180		0.996507			1
129	Cervical spondylopathy	Cathepsin E	Weighted median	3	2.14634	22.0705	0.922528	-41.1117	45.4044	8.55354	1.4e-18	5.23475e+19					0.99633
130	Cervical spondylopathy	Cathepsin E	Simple mode	3	3.27905	27.7841	0.916837	-51.1778	57.7359	26.5505	5.94e-23	1.19e+25					1
131	Cervical spondylopathy	Cathepsin E	Weighted mode	3	3.38989	26.3127	0.909279	-48.183	54.9628	29.6625	1.19e-21	7.41e+23					1
132	Cervical spondylopathy	Cathepsin E	Maximum likelihood	3	-9.74493	18.0263	0.588786	-45.0764	25.5865	5.86e-05	2.65e-20	129448000000					0.963468
133	Cervical spondylopathy	Cathepsin H	Inverse variance weighted	3	33.3972	17.8431	0.0612467	-1.57537	68.3697	319309000000000	0.206932	4.93e+29	21.9001	0.656856	0.528764		1
134	Cervical spondylopathy	Cathepsin H	MR Egger	3	-96.2249	143.016	0.622959	-376.536	184.086	1.62e-42	2.97e-164	8.86e+79		0.937613			1
135	Cervical spondylopathy	Cathepsin H	Weighted median	3	22.3104	22.3645	0.318481	-21.5239	66.1448	4889811989	4.49e-10	5.32e+28					1
136	Cervical spondylopathy	Cathepsin H	Simple mode	3	21.6411	26.9192	0.505805	-31.1205	74.4027	2503904229	3.05e-14	2.05e+32					1
137	Cervical spondylopathy	Cathepsin H	Weighted mode	3	21.7261	25.1896	0.479315	-27.6456	71.0979	2726107542	9.86e-13	7.54e+30					1
138	Cervical spondylopathy	Cathepsin H	Maximum likelihood	3	33.7992	18.426	0.0666065	-2.31578	69.9141	477306000000000	0.0986887	2.31e+30					1
139	Cervical spondylopathy	Cathepsin O	Inverse variance weighted	3	11.5725	19.5444	0.553774	-26.7345	49.8795	106141	2.45e-12	4.6e+21	21.9001	0.30126	0.542926		1
140	Cervical spondylopathy	Cathepsin O	MR Egger	3	156.175	166.851	0.521032	-170.852	483.202	6.7e+67	6.31e-75	7.11e+209		0.243349			1
141	Cervical spondylopathy	Cathepsin O	Weighted median	3	-5.87691	24.5826	0.811053	-54.0588	42.305	0.00280343	3.33e-24	2.35951e+18					1
142	Cervical spondylopathy	Cathepsin O	Simple mode	3	-9.08265	30.6649	0.79501	-69.1859	51.0206	0.000113621	8.97e-31	1.44e+22					1
143	Cervical spondylopathy	Cathepsin O	Weighted mode	3	-9.28256	29.1332	0.780207	-66.3835	47.8184	9.3e-05	1.48e-29	5.85e+20					1
144	Cervical spondylopathy	Cathepsin O	Maximum likelihood	3	12.0141	18.2305	0.509888	-23.7176	47.7458	165068	5.01e-11	5.44e+20					1
145	Cervical spondylopathy	Cathepsin S	Inverse variance weighted	3	-3.62888	25.4685	0.886697	-53.5471	46.2893	0.0265459	5.56e-24	1.27e+20	21.9001	0.130375	0.714133		1
146	Cervical spondylopathy	Cathepsin S	MR Egger	3	120.712	260.07	0.723351	-389.026	630.45	2.66e+52	1.12e-169	6.32e+273		0.0689921			0.952706
147	Cervical spondylopathy	Cathepsin S	Weighted median	3	-26.4918	24.1011	0.271682	-73.73	20.7463	3.12e-12	9.54e-33	1023296976					1
148	Cervical spondylopathy	Cathepsin S	Simple mode	3	-27.2496	29.3827	0.451622	-84.8397	30.3405	1.46e-12	1.43e-37	15021300000000					1
149	Cervical spondylopathy	Cathepsin S	Weighted mode	3	-27.0734	26.7027	0.417342	-79.4106	25.2638	1.75e-12	3.25e-35	93737208449					1
150	Cervical spondylopathy	Cathepsin S	Maximum likelihood	3	-3.85727	18.3984	0.833939	-39.918	32.2035	0.0211257	4.61e-18	96783800000000					1
151	Cervical spondylopathy	Cathepsin L2	Inverse variance weighted	3	3.96263	17.8431	0.82425	-31.0099	38.9352	52.5957	3.41e-14	8.11586e+16	21.9001	0.746751	0.955806		1
152	Cervical spondylopathy	Cathepsin L2	MR Egger	3	13.8291	143.016	0.938632	-266.482	294.14	1.01373e+06	1.85e-116	5.54e+127		0.446621			1
153	Cervical spondylopathy	Cathepsin L2	Weighted median	3	0.0957015	21.658	0.996474	-42.354	42.5454	1.10043	4.04e-19	3.00079e+18					0.996474
154	Cervical spondylopathy	Cathepsin L2	Simple mode	3	-2.76097	25.1904	0.92273	-52.1341	46.6122	0.0632304	2.28e-23	1.75e+20					1
155	Cervical spondylopathy	Cathepsin L2	Weighted mode	3	-3.36539	24.8305	0.9046	-52.0332	45.3025	0.0345487	2.52e-23	4.72728e+19					1
156	Cervical spondylopathy	Cathepsin L2	Maximum likelihood	3	3.99791	17.9311	0.823567	-31.147	39.1428	54.4841	2.97e-14	9.98831e+16					1
157	Cervical spondylopathy	Cathepsin Z	Inverse variance weighted	3	3.3015	17.8431	0.853206	-31.6711	38.274	27.1533	1.76e-14	4.18993e+16	21.9001	0.794558	0.843252		1
158	Cervical spondylopathy	Cathepsin Z	MR Egger	3	-32.3601	143.016	0.858338	-312.671	247.951	8.83e-15	1.62e-136	4.83e+107		0.528757			0.993219
159	Cervical spondylopathy	Cathepsin Z	Weighted median	3	6.74494	21.7875	0.756881	-35.9585	49.4484	849.752	2.42e-16	2.99e+21					1
160	Cervical spondylopathy	Cathepsin Z	Simple mode	3	12.3632	23.7241	0.654238	-34.1361	58.8625	234025	1.5e-15	3.66e+25					1
161	Cervical spondylopathy	Cathepsin Z	Weighted mode	3	11.9195	25.196	0.682766	-37.4647	61.3037	150170	5.36e-17	4.21e+26					1
162	Cervical spondylopathy	Cathepsin Z	Maximum likelihood	3	3.32547	17.9134	0.852726	-31.7847	38.4357	27.812	1.57e-14	4.92493e+16					1
163	Meniscal disorders	Cathepsin B	Inverse variance weighted	30	-0.109585	0.065012	0.0918693	-0.237009	0.0178381	0.896206	0.788984	1.018	23.7708	0.732588	0.146604	0.728	1
164	Meniscal disorders	Cathepsin B	MR Egger	30	-0.284197	0.133804	0.0426395	-0.546452	-0.0219412	0.752619	0.579	0.978298		0.795147			0.986799
165	Meniscal disorders	Cathepsin B	Weighted median	30	-0.126479	0.0922699	0.170453	-0.307328	0.0543699	0.881193	0.735409	1.05588					1
166	Meniscal disorders	Cathepsin B	Simple mode	30	-0.0504568	0.206175	0.80839	-0.454559	0.353646	0.950795	0.634728	1.42425					1
167	Meniscal disorders	Cathepsin B	Weighted mode	30	-0.141793	0.164341	0.395329	-0.463901	0.180315	0.867801	0.628826	1.1976					1
168	Meniscal disorders	Cathepsin B	Maximum likelihood	30	-0.110798	0.0661926	0.0941547	-0.240536	0.0189392	0.895119	0.786207	1.01912					1
169	Meniscal disorders	Cathepsin F	Inverse variance weighted	30	-0.069181	0.0650203	0.287333	-0.196621	0.0582588	0.933158	0.821502	1.05999	23.7708	0.578455	0.31124	0.592	1
170	Meniscal disorders	Cathepsin F	MR Egger	30	-0.189875	0.133883	0.167162	-0.452285	0.0725354	0.827063	0.636173	1.07523		0.583412			1
171	Meniscal disorders	Cathepsin F	Weighted median	30	-0.102601	0.0959976	0.285168	-0.290756	0.0855548	0.902487	0.747698	1.08932					1
172	Meniscal disorders	Cathepsin F	Simple mode	30	-0.0413624	0.17429	0.814078	-0.382971	0.300247	0.959481	0.681832	1.35019					1
173	Meniscal disorders	Cathepsin F	Weighted mode	30	-0.0815637	0.129614	0.534092	-0.335607	0.17248	0.921674	0.714904	1.18825					1
174	Meniscal disorders	Cathepsin F	Maximum likelihood	30	-0.0686094	0.0661295	0.299502	-0.198223	0.0610044	0.933691	0.820187	1.0629					1
175	Meniscal disorders	Cathepsin G	Inverse variance weighted	30	-0.00402457	0.0649956	0.950626	-0.131416	0.123367	0.995984	0.876853	1.1313	23.7708	0.696554	0.297801	0.713	1
176	Meniscal disorders	Cathepsin G	MR Egger	30	-0.128108	0.133807	0.346554	-0.39037	0.134153	0.879758	0.676806	1.14357		0.706649			1
177	Meniscal disorders	Cathepsin G	Weighted median	30	-0.0168004	0.0920491	0.855178	-0.197217	0.163616	0.98334	0.821013	1.17776					1
178	Meniscal disorders	Cathepsin G	Simple mode	30	0.0386781	0.161347	0.812233	-0.277561	0.354917	1.03944	0.757629	1.42606					1
179	Meniscal disorders	Cathepsin G	Weighted mode	30	-0.021251	0.13834	0.878977	-0.292397	0.249895	0.978973	0.746472	1.28389					1
180	Meniscal disorders	Cathepsin G	Maximum likelihood	30	-0.00417237	0.066023	0.949611	-0.133577	0.125233	0.995836	0.87496	1.13341					0.998941
181	Meniscal disorders	Cathepsin E	Inverse variance weighted	30	-0.00865353	0.0676218	0.898173	-0.141192	0.123885	0.991384	0.868322	1.13189	23.7708	0.348314	0.530916	0.35	1
182	Meniscal disorders	Cathepsin E	MR Egger	30	0.0693812	0.140696	0.625767	-0.206383	0.345145	1.07184	0.813522	1.41219		0.32052			1
183	Meniscal disorders	Cathepsin E	Weighted median	30	0.0821722	0.0969671	0.396759	-0.107883	0.272228	1.08564	0.897732	1.31289					0.988846
184	Meniscal disorders	Cathepsin E	Simple mode	30	0.0633469	0.186404	0.736429	-0.302005	0.428699	1.0654	0.739334	1.53526					1
185	Meniscal disorders	Cathepsin E	Weighted mode	30	0.124092	0.127378	0.338014	-0.12557	0.373753	1.13212	0.881994	1.45318					1
186	Meniscal disorders	Cathepsin E	Maximum likelihood	30	-0.00902633	0.0664264	0.891912	-0.139222	0.121169	0.991014	0.870035	1.12882					1
187	Meniscal disorders	Cathepsin H	Inverse variance weighted	30	0.0946942	0.0679161	0.163233	-0.0384214	0.22781	1.09932	0.962307	1.25585	23.7708	0.335612	0.749855	0.342	1
188	Meniscal disorders	Cathepsin H	MR Egger	30	0.0547048	0.142071	0.703108	-0.223755	0.333165	1.05623	0.799511	1.39538		0.294076			0.949196
189	Meniscal disorders	Cathepsin H	Weighted median	30	0.128803	0.0982712	0.189962	-0.0638083	0.321415	1.13747	0.938185	1.37908					1
190	Meniscal disorders	Cathepsin H	Simple mode	30	0.160422	0.174025	0.364221	-0.180667	0.501512	1.17401	0.834713	1.65122					1
191	Meniscal disorders	Cathepsin H	Weighted mode	30	0.160422	0.150823	0.296265	-0.13519	0.456035	1.17401	0.87355	1.57781					1
192	Meniscal disorders	Cathepsin H	Maximum likelihood	30	0.09899	0.0666054	0.137222	-0.0315565	0.229537	1.10406	0.968936	1.25802					0.926246
193	Meniscal disorders	Cathepsin O	Inverse variance weighted	30	0.0597944	0.0650099	0.35769	-0.0676249	0.187214	1.06162	0.934611	1.20589	23.7708	0.563553	0.836222	0.557	1
194	Meniscal disorders	Cathepsin O	MR Egger	30	0.0353786	0.133858	0.793485	-0.226983	0.29774	1.03601	0.796935	1.34681		0.512395			0.9665
195	Meniscal disorders	Cathepsin O	Weighted median	30	0.0492017	0.0984906	0.617387	-0.14384	0.242243	1.05043	0.866026	1.2741					1
196	Meniscal disorders	Cathepsin O	Simple mode	30	0.0865448	0.183623	0.640941	-0.273357	0.446446	1.0904	0.760821	1.56275					1
197	Meniscal disorders	Cathepsin O	Weighted mode	30	0.114353	0.150874	0.454606	-0.181361	0.410066	1.12115	0.834134	1.50692					1
198	Meniscal disorders	Cathepsin O	Maximum likelihood	30	0.0616707	0.0663933	0.352957	-0.0684603	0.191802	1.06361	0.933831	1.21143					1
199	Meniscal disorders	Cathepsin S	Inverse variance weighted	30	-0.0365193	0.0650331	0.574423	-0.163984	0.0909455	0.964139	0.848755	1.09521	23.7708	0.917834	0.734761	0.92	1
200	Meniscal disorders	Cathepsin S	MR Egger	30	-0.0765745	0.133907	0.571986	-0.339032	0.185883	0.926284	0.71246	1.20428		0.897649			1
201	Meniscal disorders	Cathepsin S	Weighted median	30	-0.0636344	0.0926144	0.492026	-0.245159	0.11789	0.938348	0.78258	1.12512					1
202	Meniscal disorders	Cathepsin S	Simple mode	30	-0.0482284	0.151205	0.752042	-0.34459	0.248133	0.952916	0.708511	1.28163					1
203	Meniscal disorders	Cathepsin S	Weighted mode	30	-0.0662409	0.124196	0.597849	-0.309664	0.177182	0.935905	0.733693	1.19385					1
204	Meniscal disorders	Cathepsin S	Maximum likelihood	30	-0.0373496	0.0657466	0.569978	-0.166213	0.0915138	0.963339	0.846866	1.09583					1
205	Meniscal disorders	Cathepsin L2	Inverse variance weighted	30	0.103921	0.0650118	0.109933	-0.0235022	0.231344	1.10951	0.976772	1.26029	23.7708	0.763089	0.794723	0.762	1
206	Meniscal disorders	Cathepsin L2	MR Egger	30	0.134653	0.133845	0.323013	-0.127683	0.396988	1.14414	0.880133	1.48734		0.721883			1
207	Meniscal disorders	Cathepsin L2	Weighted median	30	0.130368	0.0964503	0.176483	-0.0586741	0.319411	1.13925	0.943014	1.37632					1
208	Meniscal disorders	Cathepsin L2	Simple mode	30	-0.007762	0.177105	0.965343	-0.354888	0.339364	0.992268	0.701252	1.40405					1
209	Meniscal disorders	Cathepsin L2	Weighted mode	30	0.117088	0.138322	0.404212	-0.154023	0.388198	1.12422	0.857253	1.47432					1
210	Meniscal disorders	Cathepsin L2	Maximum likelihood	30	0.107992	0.066014	0.101861	-0.0213953	0.237379	1.11404	0.978832	1.26792					1
211	Meniscal disorders	Cathepsin Z	Inverse variance weighted	30	-0.0279167	0.0659195	0.671933	-0.157119	0.101286	0.972469	0.854602	1.10659	23.7708	0.422897	0.162304	0.386	1
212	Meniscal disorders	Cathepsin Z	MR Egger	30	-0.195896	0.133881	0.154547	-0.458303	0.0665114	0.822098	0.632356	1.06877		0.477069			1
213	Meniscal disorders	Cathepsin Z	Weighted median	30	-0.134812	0.0933633	0.148752	-0.317805	0.0481797	0.87388	0.727745	1.04936					1
214	Meniscal disorders	Cathepsin Z	Simple mode	30	-0.1347	0.159777	0.406102	-0.447863	0.178463	0.873978	0.638992	1.19538					1
215	Meniscal disorders	Cathepsin Z	Weighted mode	30	-0.1347	0.129274	0.306034	-0.388077	0.118677	0.873978	0.67836	1.12601					1
216	Meniscal disorders	Cathepsin Z	Maximum likelihood	30	-0.0291865	0.066225	0.659417	-0.158987	0.100614	0.971235	0.853007	1.10585					0.99837
217	Carpal tunnel syndrome	Cathepsin B	Inverse variance weighted	66	0.00882542	0.0561226	0.875046	-0.101175	0.118826	1.00886	0.903775	1.12617	26.0976	0.11175	0.677558	0.119	1
218	Carpal tunnel syndrome	Cathepsin B	MR Egger	66	0.059087	0.132924	0.658168	-0.201444	0.319618	1.06087	0.81755	1.3766		0.099194			0.978195
219	Carpal tunnel syndrome	Cathepsin B	Weighted median	66	0.00605237	0.0807539	0.940256	-0.152225	0.16433	1.00607	0.858795	1.1786					0.9891
220	Carpal tunnel syndrome	Cathepsin B	Simple mode	66	0.300053	0.168779	0.0801168	-0.0307542	0.63086	1.34993	0.969714	1.87923					1
221	Carpal tunnel syndrome	Cathepsin B	Weighted mode	66	0.211569	0.131287	0.111916	-0.0457534	0.468892	1.23562	0.955278	1.59822					1
222	Carpal tunnel syndrome	Cathepsin B	Maximum likelihood	66	0.00925393	0.0519926	0.858734	-0.0926516	0.111159	1.0093	0.911511	1.11757					1
223	Carpal tunnel syndrome	Cathepsin F	Inverse variance weighted	66	-0.0049997	0.0595577	0.933098	-0.121733	0.111733	0.995013	0.885385	1.11821	26.0976	0.0253024	0.688411	0.018	1
224	Carpal tunnel syndrome	Cathepsin F	MR Egger	66	-0.0564277	0.141038	0.690424	-0.332862	0.220007	0.945135	0.716869	1.24609		0.0215645			0.964212
225	Carpal tunnel syndrome	Cathepsin F	Weighted median	66	-0.0160786	0.0834158	0.847153	-0.179573	0.147416	0.98405	0.835627	1.15884					1
226	Carpal tunnel syndrome	Cathepsin F	Simple mode	66	-0.143543	0.197943	0.470948	-0.531511	0.244425	0.866283	0.587716	1.27689					1
227	Carpal tunnel syndrome	Cathepsin F	Weighted mode	66	-0.0639887	0.149804	0.670682	-0.357605	0.229628	0.938016	0.699349	1.25813					1
228	Carpal tunnel syndrome	Cathepsin F	Maximum likelihood	66	-0.00505117	0.0522194	0.922941	-0.107401	0.0972988	0.994962	0.898165	1.10219					1
229	Carpal tunnel syndrome	Cathepsin G	Inverse variance weighted	66	-0.0779439	0.0508648	0.12543	-0.177639	0.0217511	0.925016	0.837245	1.02199	26.0976	0.725215	0.755106	0.746	1
230	Carpal tunnel syndrome	Cathepsin G	MR Egger	66	-0.111879	0.119677	0.353385	-0.346446	0.122688	0.894153	0.707197	1.13053		0.697647			1
231	Carpal tunnel syndrome	Cathepsin G	Weighted median	66	-0.0971309	0.0789175	0.218401	-0.251809	0.0575474	0.907437	0.777393	1.05924					1
232	Carpal tunnel syndrome	Cathepsin G	Simple mode	66	0.00556358	0.179544	0.975375	-0.346343	0.35747	1.00558	0.70727	1.42971					1
233	Carpal tunnel syndrome	Cathepsin G	Weighted mode	66	-0.02031	0.14654	0.890197	-0.307529	0.266909	0.979895	0.735261	1.30592					1
234	Carpal tunnel syndrome	Cathepsin G	Maximum likelihood	66	-0.077914	0.0517055	0.131841	-0.179257	0.0234288	0.925044	0.835891	1.02371					0.928623
235	Carpal tunnel syndrome	Cathepsin E	Inverse variance weighted	66	0.0690512	0.0508648	0.174609	-0.0306439	0.168746	1.07149	0.969821	1.18382	26.0976	0.988529	0.300449	0.985	1
236	Carpal tunnel syndrome	Cathepsin E	MR Egger	66	0.182161	0.119696	0.13297	-0.0524434	0.416765	1.19981	0.948908	1.51705		0.989531			1
237	Carpal tunnel syndrome	Cathepsin E	Weighted median	66	0.107627	0.0696283	0.122168	-0.0288444	0.244098	1.11363	0.971568	1.27647					1
238	Carpal tunnel syndrome	Cathepsin E	Simple mode	66	0.180562	0.147099	0.224066	-0.107751	0.468875	1.19789	0.897851	1.59819					1
239	Carpal tunnel syndrome	Cathepsin E	Weighted mode	66	0.180562	0.139201	0.199173	-0.092273	0.453396	1.19789	0.911856	1.57365					1
240	Carpal tunnel syndrome	Cathepsin E	Maximum likelihood	66	0.0697417	0.0514048	0.174871	-0.0310116	0.170495	1.07223	0.969464	1.18589					0.944303
241	Carpal tunnel syndrome	Cathepsin H	Inverse variance weighted	66	0.0362732	0.0508696	0.475807	-0.0634312	0.135978	1.03694	0.938539	1.14566	26.0976	0.940163	0.112508	0.936	1
242	Carpal tunnel syndrome	Cathepsin H	MR Egger	66	0.21063	0.119701	0.0832488	-0.023984	0.445244	1.23446	0.976301	1.56087		0.959531			1
243	Carpal tunnel syndrome	Cathepsin H	Weighted median	66	0.061625	0.0722655	0.393794	-0.0800155	0.203265	1.06356	0.923102	1.2254					1
244	Carpal tunnel syndrome	Cathepsin H	Simple mode	66	0.0226019	0.182368	0.901748	-0.334839	0.380042	1.02286	0.715454	1.46235					1
245	Carpal tunnel syndrome	Cathepsin H	Weighted mode	66	0.0686696	0.164002	0.676807	-0.252775	0.390114	1.07108	0.776643	1.47715					1
246	Carpal tunnel syndrome	Cathepsin H	Maximum likelihood	66	0.0371523	0.0517558	0.472856	-0.064289	0.138594	1.03785	0.937734	1.14866					1
247	Carpal tunnel syndrome	Cathepsin O	Inverse variance weighted	66	0.00400775	0.0508712	0.937206	-0.0956999	0.103715	1.00402	0.908737	1.10928	26.0976	0.930135	0.722358	0.938	1
248	Carpal tunnel syndrome	Cathepsin O	MR Egger	66	0.0426764	0.119701	0.722619	-0.191937	0.27729	1.0436	0.825359	1.31955		0.918914			0.959544
249	Carpal tunnel syndrome	Cathepsin O	Weighted median	66	-0.00587072	0.0720051	0.935019	-0.147001	0.135259	0.994146	0.863293	1.14483					0.996533
250	Carpal tunnel syndrome	Cathepsin O	Simple mode	66	0.0890065	0.173966	0.610643	-0.251967	0.42998	1.09309	0.77727	1.53723					1
251	Carpal tunnel syndrome	Cathepsin O	Weighted mode	66	0.0890065	0.13581	0.51454	-0.177182	0.355195	1.09309	0.837628	1.42646					1
252	Carpal tunnel syndrome	Cathepsin O	Maximum likelihood	66	0.00408695	0.051574	0.936838	-0.0969981	0.105172	1.0041	0.907558	1.1109					0.991946
253	Carpal tunnel syndrome	Cathepsin S	Inverse variance weighted	66	0.0159506	0.0530597	0.763707	-0.0880463	0.119948	1.01608	0.915718	1.12744	26.0976	0.291896	0.114562	0.301	1
254	Carpal tunnel syndrome	Cathepsin S	MR Egger	66	0.194573	0.12335	0.119634	-0.0471938	0.43634	1.21479	0.953903	1.54703		0.341926			1
255	Carpal tunnel syndrome	Cathepsin S	Weighted median	66	0.112164	0.0757088	0.138468	-0.0362251	0.260553	1.1187	0.964423	1.29765					1
256	Carpal tunnel syndrome	Cathepsin S	Simple mode	66	0.165666	0.161892	0.309954	-0.151642	0.482974	1.18018	0.859296	1.62089					1
257	Carpal tunnel syndrome	Cathepsin S	Weighted mode	66	0.179577	0.130496	0.17351	-0.0761952	0.43535	1.19671	0.926635	1.5455					1
258	Carpal tunnel syndrome	Cathepsin S	Maximum likelihood	66	0.0166695	0.0519092	0.748113	-0.0850724	0.118412	1.01681	0.918446	1.12571					1
259	Carpal tunnel syndrome	Cathepsin L2	Inverse variance weighted	66	0.0383238	0.0508701	0.45123	-0.0613816	0.138029	1.03907	0.940464	1.14801	26.0976	0.945396	0.444676	0.942	1
260	Carpal tunnel syndrome	Cathepsin L2	MR Egger	66	0.121651	0.119694	0.313292	-0.11295	0.356252	1.12936	0.893195	1.42797		0.942114			1
261	Carpal tunnel syndrome	Cathepsin L2	Weighted median	66	0.0945341	0.0754654	0.210322	-0.0533781	0.242446	1.09915	0.948022	1.27436					1
262	Carpal tunnel syndrome	Cathepsin L2	Simple mode	66	0.155455	0.177298	0.383823	-0.192049	0.50296	1.16819	0.825266	1.65361					1
263	Carpal tunnel syndrome	Cathepsin L2	Weighted mode	66	0.119888	0.13817	0.388757	-0.150924	0.390701	1.12737	0.859913	1.47802					1
264	Carpal tunnel syndrome	Cathepsin L2	Maximum likelihood	66	0.0389561	0.0516091	0.450352	-0.0621979	0.14011	1.03972	0.939697	1.1504					1
265	Carpal tunnel syndrome	Cathepsin Z	Inverse variance weighted	66	0.016705	0.0508598	0.742569	-0.0829801	0.11639	1.01685	0.920369	1.12343	26.0976	0.959174	0.626785	0.975	1
266	Carpal tunnel syndrome	Cathepsin Z	MR Egger	66	0.069631	0.119665	0.562689	-0.164912	0.304174	1.07211	0.847969	1.3555		0.952948			1
267	Carpal tunnel syndrome	Cathepsin Z	Weighted median	66	-0.0156805	0.0728574	0.829594	-0.158481	0.12712	0.984442	0.853439	1.13555					1
268	Carpal tunnel syndrome	Cathepsin Z	Simple mode	66	-0.134748	0.164563	0.415878	-0.457292	0.187795	0.873936	0.632995	1.20659					1
269	Carpal tunnel syndrome	Cathepsin Z	Weighted mode	66	-0.111163	0.146329	0.450191	-0.397968	0.175641	0.894793	0.671684	1.19201					1
270	Carpal tunnel syndrome	Cathepsin Z	Maximum likelihood	66	0.0172566	0.0515398	0.73776	-0.0837614	0.118275	1.01741	0.919651	1.12555					1
271	Benign tumors of bone and articular cartilage	Cathepsin B	Inverse variance weighted	4	-0.0245091	0.0144298	0.0894115	-0.0527914	0.00377324	0.975789	0.948578	1.00378	22.5013	0.398233	0.266731	0.469	1
272	Benign tumors of bone and articular cartilage	Cathepsin B	MR Egger	4	0.0183678	0.0316004	0.61985	-0.0435691	0.0803046	1.01854	0.957366	1.08362		0.729275			1
273	Benign tumors of bone and articular cartilage	Cathepsin B	Weighted median	4	-0.0236039	0.0186324	0.20522	-0.0601235	0.0129156	0.976672	0.941648	1.013					1
274	Benign tumors of bone and articular cartilage	Cathepsin B	Simple mode	4	-0.0216718	0.0248617	0.447525	-0.0704007	0.0270572	0.978561	0.93202	1.02743					1
275	Benign tumors of bone and articular cartilage	Cathepsin B	Weighted mode	4	-0.0200076	0.0234643	0.456502	-0.0659977	0.0259825	0.980191	0.936133	1.02632					1
276	Benign tumors of bone and articular cartilage	Cathepsin B	Maximum likelihood	4	-0.0253896	0.015052	0.0916432	-0.0548916	0.00411232	0.97493	0.946588	1.00412					1
277	Benign tumors of bone and articular cartilage	Cathepsin F	Inverse variance weighted	4	-0.000623921	0.0144298	0.965511	-0.0289063	0.0276584	0.999376	0.971508	1.02804	22.5013	0.425728	0.247009	0.488	0.99626
278	Benign tumors of bone and articular cartilage	Cathepsin F	MR Egger	4	-0.0461199	0.0316004	0.281846	-0.108057	0.0158169	0.954927	0.897577	1.01594		0.919612			1
279	Benign tumors of bone and articular cartilage	Cathepsin F	Weighted median	4	-0.000215749	0.0177495	0.990302	-0.0350048	0.0345733	0.999784	0.965601	1.03518					1
280	Benign tumors of bone and articular cartilage	Cathepsin F	Simple mode	4	-0.000292017	0.0242924	0.991164	-0.0479051	0.0473211	0.999708	0.953224	1.04846					1
281	Benign tumors of bone and articular cartilage	Cathepsin F	Weighted mode	4	-0.00345387	0.0253003	0.900061	-0.0530425	0.0461348	0.996552	0.94834	1.04722					1
282	Benign tumors of bone and articular cartilage	Cathepsin F	Maximum likelihood	4	-0.000640398	0.0146423	0.965115	-0.0293394	0.0280586	0.99936	0.971087	1.02846					0.989548
283	Benign tumors of bone and articular cartilage	Cathepsin G	Inverse variance weighted	4	-0.0158576	0.0249115	0.524414	-0.0646842	0.032969	0.984267	0.937363	1.03352	22.5013	0.0300807	0.442614	0.07	1
284	Benign tumors of bone and articular cartilage	Cathepsin G	MR Egger	4	0.0309993	0.0554741	0.632513	-0.07773	0.139729	1.03148	0.925214	1.14996		0.0458797			1
285	Benign tumors of bone and articular cartilage	Cathepsin G	Weighted median	4	-0.00159548	0.0183543	0.930729	-0.0375699	0.0343789	0.998406	0.963127	1.03498					0.998531
286	Benign tumors of bone and articular cartilage	Cathepsin G	Simple mode	4	0.000352078	0.0210647	0.987714	-0.0409347	0.0416388	1.00035	0.959892	1.04252					1
287	Benign tumors of bone and articular cartilage	Cathepsin G	Weighted mode	4	-2.36e-05	0.0201668	0.99914	-0.0395504	0.0395032	0.999976	0.961221	1.04029					0.99914
288	Benign tumors of bone and articular cartilage	Cathepsin G	Maximum likelihood	4	-0.0173451	0.0153334	0.257972	-0.0473987	0.0127084	0.982804	0.953707	1.01279					0.995036
289	Benign tumors of bone and articular cartilage	Cathepsin E	Inverse variance weighted	4	0.0016475	0.0144298	0.9091	-0.0266348	0.0299298	1.00165	0.973717	1.03038	22.5013	0.862569	0.523879	0.858	1
290	Benign tumors of bone and articular cartilage	Cathepsin E	MR Egger	4	-0.0198789	0.0316004	0.593576	-0.0818157	0.042058	0.980317	0.921442	1.04295		0.923705			1
291	Benign tumors of bone and articular cartilage	Cathepsin E	Weighted median	4	-0.00082532	0.0164596	0.960009	-0.0330861	0.0314355	0.999175	0.967455	1.03193					0.996932
292	Benign tumors of bone and articular cartilage	Cathepsin E	Simple mode	4	0.0146899	0.02185	0.549537	-0.0281362	0.057516	1.0148	0.972256	1.0592					1
293	Benign tumors of bone and articular cartilage	Cathepsin E	Weighted mode	4	-0.0079511	0.02088	0.728718	-0.048876	0.0329738	0.99208	0.952299	1.03352					1
294	Benign tumors of bone and articular cartilage	Cathepsin E	Maximum likelihood	4	0.0016619	0.014494	0.908714	-0.0267463	0.0300702	1.00166	0.973608	1.03053					1
295	Benign tumors of bone and articular cartilage	Cathepsin H	Inverse variance weighted	4	-0.00729111	0.014418	0.61307	-0.0355503	0.0209681	0.992735	0.965074	1.02119	22.5013	0.542863	0.54198	0.565	1
296	Benign tumors of bone and articular cartilage	Cathepsin H	MR Egger	4	0.0131978	0.0315995	0.716765	-0.0487372	0.0751327	1.01329	0.952431	1.07803		0.446183			0.959636
297	Benign tumors of bone and articular cartilage	Cathepsin H	Weighted median	4	0.00407909	0.0168779	0.809027	-0.0290016	0.0371598	1.00409	0.971415	1.03786					1
298	Benign tumors of bone and articular cartilage	Cathepsin H	Simple mode	4	0.0052843	0.0233015	0.83517	-0.0403866	0.0509552	1.0053	0.960418	1.05228					1
299	Benign tumors of bone and articular cartilage	Cathepsin H	Weighted mode	4	0.00556359	0.0221382	0.817804	-0.0378273	0.0489545	1.00558	0.962879	1.05017					1
300	Benign tumors of bone and articular cartilage	Cathepsin H	Maximum likelihood	4	-0.00747484	0.0146275	0.609343	-0.0361448	0.0211951	0.992553	0.964501	1.02142					0.977361
301	Benign tumors of bone and articular cartilage	Cathepsin O	Inverse variance weighted	4	-0.00593384	0.0144298	0.680909	-0.0342162	0.0223485	0.994084	0.966363	1.0226	22.5013	0.768538	0.463146	0.774	1
302	Benign tumors of bone and articular cartilage	Cathepsin O	MR Egger	4	0.0193656	0.0316004	0.602392	-0.0425713	0.0813024	1.01955	0.958322	1.0847		0.849776			1
303	Benign tumors of bone and articular cartilage	Cathepsin O	Weighted median	4	-0.0100395	0.0170814	0.556703	-0.0435191	0.02344	0.990011	0.957414	1.02372					1
304	Benign tumors of bone and articular cartilage	Cathepsin O	Simple mode	4	-0.0152094	0.0227697	0.551951	-0.059838	0.0294193	0.984906	0.941917	1.02986					1
305	Benign tumors of bone and articular cartilage	Cathepsin O	Weighted mode	4	-0.014296	0.0220884	0.563601	-0.0575892	0.0289973	0.985806	0.944038	1.02942					1
306	Benign tumors of bone and articular cartilage	Cathepsin O	Maximum likelihood	4	-0.00601633	0.0145585	0.679423	-0.0345511	0.0225184	0.994002	0.966039	1.02277					0.982736
307	Benign tumors of bone and articular cartilage	Cathepsin S	Inverse variance weighted	4	-0.011581	0.0144298	0.422219	-0.0398633	0.0167013	0.988486	0.960921	1.01684	22.5013	0.679903	0.554627	0.674	1
308	Benign tumors of bone and articular cartilage	Cathepsin S	MR Egger	4	-0.0313581	0.0316004	0.425612	-0.093295	0.0305787	0.969128	0.910925	1.03105		0.601882			1
309	Benign tumors of bone and articular cartilage	Cathepsin S	Weighted median	4	-0.0141674	0.0169623	0.40359	-0.0474136	0.0190788	0.985932	0.953693	1.01926					0.99063
310	Benign tumors of bone and articular cartilage	Cathepsin S	Simple mode	4	-0.0180298	0.0241153	0.50894	-0.0652958	0.0292361	0.982132	0.93679	1.02967					1
311	Benign tumors of bone and articular cartilage	Cathepsin S	Weighted mode	4	-0.0189158	0.0225273	0.462729	-0.0630693	0.0252377	0.981262	0.938878	1.02556					1
312	Benign tumors of bone and articular cartilage	Cathepsin S	Maximum likelihood	4	-0.0117827	0.0145969	0.419548	-0.0403927	0.0168273	0.988286	0.960412	1.01697					1
313	Benign tumors of bone and articular cartilage	Cathepsin L2	Inverse variance weighted	4	-0.00599123	0.0144298	0.677996	-0.0342736	0.0222911	0.994027	0.966307	1.02254	22.5013	0.601386	0.332219	0.658	1
314	Benign tumors of bone and articular cartilage	Cathepsin L2	MR Egger	4	-0.0416595	0.0316004	0.318128	-0.103596	0.0202774	0.959196	0.901589	1.02048		0.881154			1
315	Benign tumors of bone and articular cartilage	Cathepsin L2	Weighted median	4	-0.0126099	0.0163194	0.439705	-0.044596	0.0193762	0.987469	0.956384	1.01957					0.989336
316	Benign tumors of bone and articular cartilage	Cathepsin L2	Simple mode	4	-0.0157395	0.0237408	0.554738	-0.0622714	0.0307925	0.984384	0.939628	1.03127					1
317	Benign tumors of bone and articular cartilage	Cathepsin L2	Weighted mode	4	-0.0169276	0.0216606	0.491514	-0.0593824	0.0255271	0.983215	0.942346	1.02586					1
318	Benign tumors of bone and articular cartilage	Cathepsin L2	Maximum likelihood	4	-0.0060964	0.014548	0.675177	-0.0346106	0.0224178	0.993922	0.965982	1.02267					0.994352
319	Benign tumors of bone and articular cartilage	Cathepsin Z	Inverse variance weighted	4	-0.00262153	0.0161553	0.871093	-0.0342859	0.0290428	0.997382	0.966295	1.02947	22.5013	0.288528	0.20052	0.357	1
320	Benign tumors of bone and articular cartilage	Cathepsin Z	MR Egger	4	-0.0555374	0.0316004	0.220913	-0.117474	0.00639946	0.945977	0.889163	1.00642		0.896901			1
321	Benign tumors of bone and articular cartilage	Cathepsin Z	Weighted median	4	-0.00993718	0.0184839	0.590844	-0.0461656	0.0262913	0.990112	0.954884	1.02664					1
322	Benign tumors of bone and articular cartilage	Cathepsin Z	Simple mode	4	-0.0150996	0.0267579	0.611985	-0.0675451	0.0373459	0.985014	0.934686	1.03805					1
323	Benign tumors of bone and articular cartilage	Cathepsin Z	Weighted mode	4	-0.0174555	0.0258406	0.547761	-0.0681031	0.0331921	0.982696	0.934164	1.03375					1
324	Benign tumors of bone and articular cartilage	Cathepsin Z	Maximum likelihood	4	-0.00272067	0.0146966	0.853133	-0.031526	0.0260847	0.997283	0.968966	1.02643					1
325	Benign tumors: skull and facial bones	Cathepsin B	Inverse variance weighted	7	-0.00721813	0.00802062	0.368149	-0.0229386	0.00850229	0.992808	0.977323	1.00854	23.332	0.763518	0.423204	0.784	1
326	Benign tumors: skull and facial bones	Cathepsin B	MR Egger	7	-0.0132209	0.0105709	0.266382	-0.0339398	0.00749793	0.986866	0.96663	1.00753		0.76255			1
327	Benign tumors: skull and facial bones	Cathepsin B	Weighted median	7	-0.0078916	0.0101317	0.436039	-0.0277498	0.0119666	0.992139	0.972632	1.01204					1
328	Benign tumors: skull and facial bones	Cathepsin B	Simple mode	7	0.00810373	0.0141586	0.587871	-0.0196471	0.0358546	1.00814	0.980545	1.03651					1
329	Benign tumors: skull and facial bones	Cathepsin B	Weighted mode	7	-0.00870964	0.00985869	0.410991	-0.0280327	0.0106134	0.991328	0.972357	1.01067					1
330	Benign tumors: skull and facial bones	Cathepsin B	Maximum likelihood	7	-0.00742294	0.00806512	0.357377	-0.0232306	0.0083847	0.992605	0.977037	1.00842					0.99819
331	Benign tumors: skull and facial bones	Cathepsin F	Inverse variance weighted	7	-0.00351286	0.00937072	0.707752	-0.0218795	0.0148537	0.996493	0.978358	1.01496	23.332	0.224404	0.12041	0.281	1
332	Benign tumors: skull and facial bones	Cathepsin F	MR Egger	7	-0.016391	0.0105709	0.181696	-0.0371099	0.00432792	0.983743	0.96357	1.00434		0.454284			1
333	Benign tumors: skull and facial bones	Cathepsin F	Weighted median	7	-0.0122656	0.010274	0.232538	-0.0324028	0.00787149	0.987809	0.968117	1.0079					1
334	Benign tumors: skull and facial bones	Cathepsin F	Simple mode	7	-0.00998908	0.0160582	0.556789	-0.0414631	0.021485	0.990061	0.959385	1.02172					1
335	Benign tumors: skull and facial bones	Cathepsin F	Weighted mode	7	-0.0115905	0.00882183	0.236896	-0.0288813	0.0057003	0.988476	0.971532	1.00572					1
336	Benign tumors: skull and facial bones	Cathepsin F	Maximum likelihood	7	-0.0036043	0.00804767	0.654247	-0.0193777	0.0121691	0.996402	0.980809	1.01224					0.999887
337	Benign tumors: skull and facial bones	Cathepsin G	Inverse variance weighted	7	-0.00756021	0.00930693	0.416608	-0.0258018	0.0106814	0.992468	0.974528	1.01074	23.332	0.232095	0.695284	0.395	1
338	Benign tumors: skull and facial bones	Cathepsin G	MR Egger	7	-0.0039898	0.0132085	0.774765	-0.0298785	0.0218989	0.996018	0.970563	1.02214		0.166812			0.965476
339	Benign tumors: skull and facial bones	Cathepsin G	Weighted median	7	-0.0101117	0.0102329	0.32308	-0.0301682	0.0099449	0.989939	0.970282	1.00999					1
340	Benign tumors: skull and facial bones	Cathepsin G	Simple mode	7	0.00223554	0.0181087	0.905782	-0.0332575	0.0377286	1.00224	0.967289	1.03845					1
341	Benign tumors: skull and facial bones	Cathepsin G	Weighted mode	7	-0.00934446	0.0095733	0.366713	-0.0281081	0.0094192	0.990699	0.972283	1.00946					1
342	Benign tumors: skull and facial bones	Cathepsin G	Maximum likelihood	7	-0.00764063	0.0080616	0.343241	-0.0234414	0.0081601	0.992388	0.976831	1.00819					0.992947
343	Benign tumors: skull and facial bones	Cathepsin E	Inverse variance weighted	7	-0.00580962	0.0107689	0.589555	-0.0269167	0.0152974	0.994207	0.973442	1.01542	23.332	0.0941538	0.472896	0.181	1
344	Benign tumors: skull and facial bones	Cathepsin E	MR Egger	7	-0.013235	0.0146899	0.408909	-0.0420272	0.0155573	0.986852	0.958844	1.01568		0.0855961			1
345	Benign tumors: skull and facial bones	Cathepsin E	Weighted median	7	-0.0112775	0.0109958	0.305072	-0.0328293	0.0102743	0.988786	0.967704	1.01033					1
346	Benign tumors: skull and facial bones	Cathepsin E	Simple mode	7	-0.0189524	0.0194307	0.367037	-0.0570365	0.0191317	0.981226	0.94456	1.01932					1
347	Benign tumors: skull and facial bones	Cathepsin E	Weighted mode	7	-0.0134512	0.0104167	0.24411	-0.0338678	0.00696549	0.986639	0.966699	1.00699					1
348	Benign tumors: skull and facial bones	Cathepsin E	Maximum likelihood	7	-0.00605982	0.00811193	0.455048	-0.0219592	0.00983955	0.993959	0.97828	1.00989					1
349	Benign tumors: skull and facial bones	Cathepsin H	Inverse variance weighted	7	-0.00546734	0.00802073	0.49546	-0.021188	0.0102533	0.994548	0.979035	1.01031	23.332	0.655764	0.292679	0.67	1
350	Benign tumors: skull and facial bones	Cathepsin H	MR Egger	7	-0.013562	0.0105709	0.255754	-0.0342809	0.00715686	0.98653	0.9663	1.00718		0.735001			1
351	Benign tumors: skull and facial bones	Cathepsin H	Weighted median	7	-0.00826655	0.0102884	0.421694	-0.0284317	0.0118986	0.991768	0.971969	1.01197					0.990065
352	Benign tumors: skull and facial bones	Cathepsin H	Simple mode	7	0.011842	0.0154868	0.47347	-0.0185121	0.0421961	1.01191	0.981658	1.0431					1
353	Benign tumors: skull and facial bones	Cathepsin H	Weighted mode	7	-0.00915854	0.00975809	0.384185	-0.0282844	0.00996732	0.990883	0.972112	1.01002					1
354	Benign tumors: skull and facial bones	Cathepsin H	Maximum likelihood	7	-0.0055509	0.00804878	0.49041	-0.0213265	0.0102247	0.994464	0.978899	1.01028					1
355	Benign tumors: skull and facial bones	Cathepsin O	Inverse variance weighted	7	-0.00825355	0.00922787	0.3711	-0.0263402	0.00983308	0.99178	0.974004	1.00988	23.332	0.241786	0.53797	0.328	1
356	Benign tumors: skull and facial bones	Cathepsin O	MR Egger	7	-0.0137533	0.0127769	0.330913	-0.038796	0.0112894	0.986341	0.961947	1.01135		0.198483			1
357	Benign tumors: skull and facial bones	Cathepsin O	Weighted median	7	-0.0135875	0.0119327	0.254837	-0.0369755	0.00980055	0.986504	0.9637	1.00985					1
358	Benign tumors: skull and facial bones	Cathepsin O	Simple mode	7	-0.0213614	0.0205342	0.3383	-0.0616083	0.0188856	0.978865	0.940251	1.01907					1
359	Benign tumors: skull and facial bones	Cathepsin O	Weighted mode	7	-0.0118932	0.0115699	0.34362	-0.0345702	0.0107838	0.988177	0.966021	1.01084					1
360	Benign tumors: skull and facial bones	Cathepsin O	Maximum likelihood	7	-0.00880529	0.00834594	0.291407	-0.0251633	0.00755275	0.991233	0.975151	1.00758					1
361	Benign tumors: skull and facial bones	Cathepsin S	Inverse variance weighted	7	-0.00700716	0.00801851	0.382187	-0.0227234	0.00870912	0.993017	0.977533	1.00875	23.332	0.70226	0.266109	0.731	1
362	Benign tumors: skull and facial bones	Cathepsin S	MR Egger	7	-0.0156185	0.010566	0.199412	-0.036328	0.00509093	0.984503	0.964324	1.0051		0.814378			1
363	Benign tumors: skull and facial bones	Cathepsin S	Weighted median	7	-0.0103944	0.0100625	0.301614	-0.0301169	0.00932815	0.989659	0.970332	1.00937					1
364	Benign tumors: skull and facial bones	Cathepsin S	Simple mode	7	-0.010113	0.0146846	0.516754	-0.0388948	0.0186688	0.989938	0.961852	1.01884					1
365	Benign tumors: skull and facial bones	Cathepsin S	Weighted mode	7	-0.0114185	0.00978391	0.287464	-0.0305949	0.00775801	0.988646	0.969868	1.00779					1
366	Benign tumors: skull and facial bones	Cathepsin S	Maximum likelihood	7	-0.00706108	0.00801179	0.378136	-0.0227642	0.00864202	0.992964	0.977493	1.00868					1
367	Benign tumors: skull and facial bones	Cathepsin L2	Inverse variance weighted	7	-0.00429316	0.00801939	0.59241	-0.0200112	0.0114249	0.995716	0.980188	1.01149	23.332	0.843829	0.361583	0.903	1
368	Benign tumors: skull and facial bones	Cathepsin L2	MR Egger	7	-0.0111985	0.0105661	0.337699	-0.031908	0.00951092	0.988864	0.968596	1.00956		0.888117			1
369	Benign tumors: skull and facial bones	Cathepsin L2	Weighted median	7	-0.00574861	0.00989297	0.561186	-0.0251388	0.0136416	0.994268	0.975175	1.01374					1
370	Benign tumors: skull and facial bones	Cathepsin L2	Simple mode	7	-0.00764024	0.0135385	0.592981	-0.0341758	0.0188953	0.992389	0.966402	1.01907					1
371	Benign tumors: skull and facial bones	Cathepsin L2	Weighted mode	7	-0.00577241	0.00944957	0.563698	-0.0242936	0.0127487	0.994244	0.975999	1.01283					1
372	Benign tumors: skull and facial bones	Cathepsin L2	Maximum likelihood	7	-0.00430734	0.00803616	0.591962	-0.0200582	0.0114435	0.995702	0.980142	1.01151					0.958979
373	Benign tumors: skull and facial bones	Cathepsin Z	Inverse variance weighted	7	-0.00111775	0.00801984	0.889155	-0.0168366	0.0146011	0.998883	0.983304	1.01471	23.332	0.905317	0.891412	0.934	1
374	Benign tumors: skull and facial bones	Cathepsin Z	MR Egger	7	-0.000128725	0.0105709	0.990755	-0.0208476	0.0205902	0.999871	0.979368	1.0208		0.830852			0.990755
375	Benign tumors: skull and facial bones	Cathepsin Z	Weighted median	7	-0.00299201	0.0103341	0.772177	-0.0232468	0.0172628	0.997012	0.977021	1.01741					1
376	Benign tumors: skull and facial bones	Cathepsin Z	Simple mode	7	0.000784078	0.0146962	0.959183	-0.0280205	0.0295887	1.00078	0.972368	1.03003					1
377	Benign tumors: skull and facial bones	Cathepsin Z	Weighted mode	7	-0.00250321	0.00874237	0.784254	-0.0196383	0.0146318	0.9975	0.980553	1.01474					1
378	Benign tumors: skull and facial bones	Cathepsin Z	Maximum likelihood	7	-0.00112456	0.00804828	0.888876	-0.0168992	0.0146501	0.998876	0.983243	1.01476					1
379	Benign tumor: Long bones of the lower limbs	Cathepsin B	Inverse variance weighted	10	0.0246264	0.0199013	0.215928	-0.0143801	0.063633	1.02493	0.985723	1.0657	21.8266	0.685498	0.36888	0.707	1
380	Benign tumor: Long bones of the lower limbs	Cathepsin B	MR Egger	10	-0.00112708	0.0335795	0.974047	-0.0669429	0.0646887	0.998874	0.935249	1.06683		0.688883			0.980097
381	Benign tumor: Long bones of the lower limbs	Cathepsin B	Weighted median	10	0.00587379	0.0252511	0.816061	-0.0436184	0.055366	1.00589	0.957319	1.05693					1
382	Benign tumor: Long bones of the lower limbs	Cathepsin B	Simple mode	10	0.0112677	0.0405053	0.78716	-0.0681226	0.0906581	1.01133	0.934146	1.09489					1
383	Benign tumor: Long bones of the lower limbs	Cathepsin B	Weighted mode	10	0.00275729	0.0302982	0.929482	-0.0566272	0.0621418	1.00276	0.944946	1.06411					1
384	Benign tumor: Long bones of the lower limbs	Cathepsin B	Maximum likelihood	10	0.0245106	0.020419	0.22999	-0.0155106	0.0645318	1.02481	0.984609	1.06666					1
385	Benign tumor: Long bones of the lower limbs	Cathepsin F	Inverse variance weighted	10	-0.0103999	0.0234509	0.657421	-0.0563636	0.0355638	0.989654	0.945195	1.0362	21.8266	0.18625	0.662737	0.191	1
386	Benign tumor: Long bones of the lower limbs	Cathepsin F	MR Egger	10	-0.0255085	0.0414331	0.555229	-0.106717	0.0557005	0.974814	0.89878	1.05728		0.142765			1
387	Benign tumor: Long bones of the lower limbs	Cathepsin F	Weighted median	10	0.00481611	0.0286679	0.866586	-0.0513729	0.0610051	1.00483	0.949924	1.0629					1
388	Benign tumor: Long bones of the lower limbs	Cathepsin F	Simple mode	10	0.0158879	0.0468996	0.742558	-0.0760354	0.107811	1.01601	0.926783	1.11384					1
389	Benign tumor: Long bones of the lower limbs	Cathepsin F	Weighted mode	10	0.0100134	0.0350237	0.781423	-0.0586331	0.0786599	1.01006	0.943053	1.08184					1
390	Benign tumor: Long bones of the lower limbs	Cathepsin F	Maximum likelihood	10	-0.0112333	0.0205676	0.584953	-0.0515457	0.0290792	0.98883	0.94976	1.02951					0.976933
391	Benign tumor: Long bones of the lower limbs	Cathepsin G	Inverse variance weighted	10	0.0036423	0.0199009	0.85478	-0.0353634	0.042648	1.00365	0.965255	1.04357	21.8266	0.557703	0.930657	0.616	1
392	Benign tumor: Long bones of the lower limbs	Cathepsin G	MR Egger	10	0.00121457	0.0335708	0.972026	-0.0645842	0.0670133	1.00122	0.937457	1.06931		0.457283			0.990366
393	Benign tumor: Long bones of the lower limbs	Cathepsin G	Weighted median	10	-0.0030436	0.0268241	0.909662	-0.0556188	0.0495316	0.996961	0.9459	1.05078					1
394	Benign tumor: Long bones of the lower limbs	Cathepsin G	Simple mode	10	-0.0187126	0.042264	0.668394	-0.10155	0.0641249	0.981461	0.903436	1.06623					1
395	Benign tumor: Long bones of the lower limbs	Cathepsin G	Weighted mode	10	-0.00475567	0.0294762	0.87539	-0.062529	0.0530177	0.995256	0.939386	1.05445					1
396	Benign tumor: Long bones of the lower limbs	Cathepsin G	Maximum likelihood	10	0.00377152	0.0201764	0.851718	-0.0357742	0.0433173	1.00378	0.964858	1.04427					1
397	Benign tumor: Long bones of the lower limbs	Cathepsin E	Inverse variance weighted	10	0.00174496	0.0198962	0.930113	-0.0372515	0.0407414	1.00175	0.963434	1.04158	21.8266	0.631021	0.642154	0.634	1
398	Benign tumor: Long bones of the lower limbs	Cathepsin E	MR Egger	10	0.0147906	0.0335544	0.67103	-0.0509761	0.0805573	1.0149	0.950301	1.08389		0.555577			0.962008
399	Benign tumor: Long bones of the lower limbs	Cathepsin E	Weighted median	10	-0.00548148	0.0272407	0.840523	-0.0588732	0.0479103	0.994534	0.942826	1.04908					1
400	Benign tumor: Long bones of the lower limbs	Cathepsin E	Simple mode	10	-0.0165369	0.0424483	0.705908	-0.0997354	0.0666617	0.983599	0.905077	1.06893					1
401	Benign tumor: Long bones of the lower limbs	Cathepsin E	Weighted mode	10	-0.00669695	0.0333612	0.845364	-0.0720848	0.0586909	0.993325	0.930452	1.06045					1
402	Benign tumor: Long bones of the lower limbs	Cathepsin E	Maximum likelihood	10	0.00178101	0.0202031	0.929753	-0.0378171	0.0413791	1.00178	0.962889	1.04225					0.997484
403	Benign tumor: Long bones of the lower limbs	Cathepsin H	Inverse variance weighted	10	0.00189489	0.0199046	0.924157	-0.0371182	0.040908	1.0019	0.963562	1.04176	21.8266	0.790584	0.638332	0.787	1
404	Benign tumor: Long bones of the lower limbs	Cathepsin H	MR Egger	10	-0.0113157	0.0335805	0.744808	-0.0771334	0.0545021	0.988748	0.925766	1.05601		0.731448			0.950071
405	Benign tumor: Long bones of the lower limbs	Cathepsin H	Weighted median	10	-0.0108601	0.0264365	0.68122	-0.0626756	0.0409554	0.989199	0.939248	1.04181					1
406	Benign tumor: Long bones of the lower limbs	Cathepsin H	Simple mode	10	-0.0114832	0.0413793	0.787657	-0.0925867	0.0696203	0.988582	0.91157	1.0721					1
407	Benign tumor: Long bones of the lower limbs	Cathepsin H	Weighted mode	10	-0.0135576	0.0301514	0.663596	-0.0726543	0.0455391	0.986534	0.929922	1.04659					1
408	Benign tumor: Long bones of the lower limbs	Cathepsin H	Maximum likelihood	10	0.0019277	0.020126	0.923694	-0.0375193	0.0413747	1.00193	0.963176	1.04224					1
409	Benign tumor: Long bones of the lower limbs	Cathepsin O	Inverse variance weighted	10	-0.0251337	0.0243466	0.301917	-0.072853	0.0225855	0.97518	0.929738	1.02284	21.8266	0.141923	0.0450306	0.14	1
410	Benign tumor: Long bones of the lower limbs	Cathepsin O	MR Egger	10	-0.089258	0.0335534	0.0287975	-0.155023	-0.0234934	0.91461	0.856396	0.97678		0.448057			1
411	Benign tumor: Long bones of the lower limbs	Cathepsin O	Weighted median	10	-0.0657985	0.0277282	0.017645	-0.120146	-0.0114513	0.93632	0.886791	0.988614					1
412	Benign tumor: Long bones of the lower limbs	Cathepsin O	Simple mode	10	-0.0479164	0.0484181	0.348209	-0.142816	0.046983	0.953213	0.866914	1.0481					1
413	Benign tumor: Long bones of the lower limbs	Cathepsin O	Weighted mode	10	-0.0635866	0.0310013	0.0704889	-0.124349	-0.00282403	0.938393	0.883071	0.99718					1
414	Benign tumor: Long bones of the lower limbs	Cathepsin O	Maximum likelihood	10	-0.0267082	0.0201402	0.184802	-0.066183	0.0127666	0.973645	0.93596	1.01285					0.935561
415	Benign tumor: Long bones of the lower limbs	Cathepsin S	Inverse variance weighted	10	-0.0184825	0.0259614	0.476513	-0.0693667	0.0324018	0.981687	0.932984	1.03293	21.8266	0.0822268	0.0251849	0.098	1
416	Benign tumor: Long bones of the lower limbs	Cathepsin S	MR Egger	10	-0.0927045	0.0335534	0.0245646	-0.158469	-0.0269399	0.911463	0.853449	0.97342		0.454578			1
417	Benign tumor: Long bones of the lower limbs	Cathepsin S	Weighted median	10	-0.0354467	0.0278975	0.20387	-0.0901258	0.0192324	0.965174	0.913816	1.01942					1
418	Benign tumor: Long bones of the lower limbs	Cathepsin S	Simple mode	10	0.00499498	0.0488511	0.920801	-0.0907532	0.100743	1.00501	0.913243	1.10599					1
419	Benign tumor: Long bones of the lower limbs	Cathepsin S	Weighted mode	10	-0.0592128	0.030742	0.0862073	-0.119467	0.00104161	0.942506	0.887393	1.00104					1
420	Benign tumor: Long bones of the lower limbs	Cathepsin S	Maximum likelihood	10	-0.0196615	0.020295	0.332652	-0.0594396	0.0201167	0.980531	0.942292	1.02032					1
421	Benign tumor: Long bones of the lower limbs	Cathepsin L2	Inverse variance weighted	10	-0.0220991	0.0199009	0.266801	-0.0611048	0.0169066	0.978143	0.940725	1.01705	21.8266	0.799503	0.422622	0.81	1
422	Benign tumor: Long bones of the lower limbs	Cathepsin L2	MR Egger	10	-0.0449467	0.0335708	0.217411	-0.110745	0.0208521	0.956048	0.895167	1.02107		0.792067			1
423	Benign tumor: Long bones of the lower limbs	Cathepsin L2	Weighted median	10	-0.0232401	0.0280054	0.406627	-0.0781307	0.0316504	0.977028	0.924844	1.03216					0.968728
424	Benign tumor: Long bones of the lower limbs	Cathepsin L2	Simple mode	10	-0.00920006	0.0415477	0.829697	-0.0906335	0.0722334	0.990842	0.913352	1.07491					1
425	Benign tumor: Long bones of the lower limbs	Cathepsin L2	Weighted mode	10	-0.0189242	0.0368989	0.620394	-0.091246	0.0533976	0.981254	0.912793	1.05485					1
426	Benign tumor: Long bones of the lower limbs	Cathepsin L2	Maximum likelihood	10	-0.0228123	0.020149	0.257558	-0.0623043	0.0166797	0.977446	0.939597	1.01682					1
427	Benign tumor: Long bones of the lower limbs	Cathepsin Z	Inverse variance weighted	10	-0.0400162	0.026195	0.126605	-0.0913583	0.011326	0.960774	0.912691	1.01139	21.8266	0.0757405	0.227216	0.078	1
428	Benign tumor: Long bones of the lower limbs	Cathepsin Z	MR Egger	10	-0.08482	0.0425362	0.0812598	-0.168191	-0.001449	0.918678	0.845192	0.998552		0.117082			1
429	Benign tumor: Long bones of the lower limbs	Cathepsin Z	Weighted median	10	-0.0270204	0.0301441	0.370053	-0.086103	0.0320621	0.973341	0.9175	1.03258					0.999142
430	Benign tumor: Long bones of the lower limbs	Cathepsin Z	Simple mode	10	-0.0250963	0.0461765	0.599997	-0.115602	0.0654097	0.975216	0.890829	1.0676					1
431	Benign tumor: Long bones of the lower limbs	Cathepsin Z	Weighted mode	10	-0.0266555	0.0349744	0.465477	-0.0952054	0.0418943	0.973697	0.909186	1.04278					1
432	Benign tumor: Long bones of the lower limbs	Cathepsin Z	Maximum likelihood	10	-0.0433365	0.0207807	0.0370308	-0.0840667	-0.00260639	0.957589	0.91937	0.997397					1
433	Benign tumors: scapula and upper limb long bones	Cathepsin B	Inverse variance weighted	7	-0.00350038	0.0182206	0.847655	-0.0392127	0.0322119	0.996506	0.961546	1.03274	22.3469	0.0913665	0.289389	0.138	1
434	Benign tumors: scapula and upper limb long bones	Cathepsin B	MR Egger	7	-0.0341569	0.0313168	0.325158	-0.0955379	0.027224	0.96642	0.908884	1.0276		0.130056			1
435	Benign tumors: scapula and upper limb long bones	Cathepsin B	Weighted median	7	0.00571894	0.0180648	0.751563	-0.029688	0.0411259	1.00574	0.970748	1.04198					1
436	Benign tumors: scapula and upper limb long bones	Cathepsin B	Simple mode	7	0.0129805	0.0272609	0.650805	-0.0404509	0.066412	1.01307	0.960356	1.06867					1
437	Benign tumors: scapula and upper limb long bones	Cathepsin B	Weighted mode	7	0.00166257	0.0242014	0.947463	-0.0457721	0.0490973	1.00166	0.95526	1.05032					1
438	Benign tumors: scapula and upper limb long bones	Cathepsin B	Maximum likelihood	7	-0.00364203	0.0138489	0.792564	-0.030786	0.0235019	0.996365	0.969683	1.02378					1
439	Benign tumors: scapula and upper limb long bones	Cathepsin F	Inverse variance weighted	7	-0.00302479	0.0135188	0.822954	-0.0295216	0.023472	0.99698	0.97091	1.02375	22.3469	0.497808	0.300154	0.513	1
440	Benign tumors: scapula and upper limb long bones	Cathepsin F	MR Egger	7	-0.0259372	0.0240009	0.329188	-0.0729791	0.0211046	0.974396	0.92962	1.02133		0.544951			1
441	Benign tumors: scapula and upper limb long bones	Cathepsin F	Weighted median	7	-0.0131094	0.0173701	0.450421	-0.0471548	0.0209359	0.986976	0.95394	1.02116					0.986057
442	Benign tumors: scapula and upper limb long bones	Cathepsin F	Simple mode	7	-0.016348	0.0265205	0.560255	-0.0683281	0.0356321	0.983785	0.933954	1.03627					1
443	Benign tumors: scapula and upper limb long bones	Cathepsin F	Weighted mode	7	-0.0177323	0.0231362	0.472488	-0.0630793	0.0276147	0.982424	0.938869	1.028					1
444	Benign tumors: scapula and upper limb long bones	Cathepsin F	Maximum likelihood	7	-0.00312087	0.013724	0.820111	-0.0300199	0.0237781	0.996884	0.970426	1.02406					1
445	Benign tumors: scapula and upper limb long bones	Cathepsin G	Inverse variance weighted	7	0.00762825	0.0135199	0.572601	-0.0188707	0.0341272	1.00766	0.981306	1.03472	22.3469	0.707412	0.814171	0.703	1
446	Benign tumors: scapula and upper limb long bones	Cathepsin G	MR Egger	7	0.0125425	0.0240042	0.623629	-0.0345057	0.0595908	1.01262	0.966083	1.0614		0.59169			1
447	Benign tumors: scapula and upper limb long bones	Cathepsin G	Weighted median	7	0.0186366	0.0172514	0.28001	-0.0151761	0.0524494	1.01881	0.984938	1.05385					1
448	Benign tumors: scapula and upper limb long bones	Cathepsin G	Simple mode	7	0.0254277	0.0271516	0.385158	-0.0277895	0.0786449	1.02575	0.972593	1.08182					1
449	Benign tumors: scapula and upper limb long bones	Cathepsin G	Weighted mode	7	0.0249033	0.0269544	0.391178	-0.0279273	0.0777338	1.02522	0.972459	1.08083					1
450	Benign tumors: scapula and upper limb long bones	Cathepsin G	Maximum likelihood	7	0.00776699	0.0137003	0.570768	-0.0190856	0.0346196	1.0078	0.981095	1.03523					1
451	Benign tumors: scapula and upper limb long bones	Cathepsin E	Inverse variance weighted	7	-0.0331221	0.0166047	0.0460704	-0.0656673	-0.000576982	0.96742	0.936442	0.999423	22.3469	0.170051	0.838823	0.209	1
452	Benign tumors: scapula and upper limb long bones	Cathepsin E	MR Egger	7	-0.0388154	0.0321563	0.281384	-0.101842	0.024211	0.961928	0.903172	1.02451		0.109832			1
453	Benign tumors: scapula and upper limb long bones	Cathepsin E	Weighted median	7	-0.0231181	0.020129	0.250764	-0.062571	0.0163348	0.977147	0.939346	1.01647					1
454	Benign tumors: scapula and upper limb long bones	Cathepsin E	Simple mode	7	0.00581346	0.0343611	0.871209	-0.0615344	0.0731613	1.00583	0.940321	1.0759					1
455	Benign tumors: scapula and upper limb long bones	Cathepsin E	Weighted mode	7	0.000105749	0.03397	0.997617	-0.0664755	0.066687	1.00011	0.935686	1.06896					1
456	Benign tumors: scapula and upper limb long bones	Cathepsin E	Maximum likelihood	7	-0.0347212	0.0139436	0.0127702	-0.0620506	-0.00739171	0.965875	0.939835	0.992636					1
457	Benign tumors: scapula and upper limb long bones	Cathepsin H	Inverse variance weighted	7	-0.00540875	0.0135229	0.689179	-0.0319136	0.0210961	0.994606	0.96859	1.02132	22.3469	0.988454	0.633009	0.992	1
458	Benign tumors: scapula and upper limb long bones	Cathepsin H	MR Egger	7	-0.01549	0.0240117	0.54729	-0.062553	0.0315729	0.984629	0.939363	1.03208		0.984982			1
459	Benign tumors: scapula and upper limb long bones	Cathepsin H	Weighted median	7	-0.0052887	0.0162019	0.744103	-0.0370443	0.0264669	0.994725	0.963633	1.02682					1
460	Benign tumors: scapula and upper limb long bones	Cathepsin H	Simple mode	7	-0.00181609	0.0223933	0.938	-0.045707	0.0420748	0.998186	0.955322	1.04297					1
461	Benign tumors: scapula and upper limb long bones	Cathepsin H	Weighted mode	7	-0.00538063	0.0210485	0.806774	-0.0466356	0.0358744	0.994634	0.954435	1.03653					1
462	Benign tumors: scapula and upper limb long bones	Cathepsin H	Maximum likelihood	7	-0.00543111	0.0135538	0.688636	-0.0319966	0.0211343	0.994584	0.96851	1.02136					0.987248
463	Benign tumors: scapula and upper limb long bones	Cathepsin O	Inverse variance weighted	7	-0.0208443	0.0152488	0.171643	-0.050732	0.00904342	0.979371	0.950533	1.00908	22.3469	0.266167	0.316306	0.328	1
464	Benign tumors: scapula and upper limb long bones	Cathepsin O	MR Egger	7	-0.0452616	0.026549	0.148945	-0.0972976	0.00677432	0.955747	0.907286	1.0068		0.294908			1
465	Benign tumors: scapula and upper limb long bones	Cathepsin O	Weighted median	7	-0.0269663	0.0182148	0.138751	-0.0626674	0.00873478	0.973394	0.939256	1.00877					1
466	Benign tumors: scapula and upper limb long bones	Cathepsin O	Simple mode	7	-0.0203163	0.029031	0.510252	-0.0772171	0.0365845	0.979889	0.925689	1.03726					1
467	Benign tumors: scapula and upper limb long bones	Cathepsin O	Weighted mode	7	-0.0287139	0.025247	0.298775	-0.0781979	0.0207702	0.971694	0.924781	1.02099					1
468	Benign tumors: scapula and upper limb long bones	Cathepsin O	Maximum likelihood	7	-0.0216221	0.0137043	0.114621	-0.0484825	0.00523833	0.97861	0.952674	1.00525					0.977294
469	Benign tumors: scapula and upper limb long bones	Cathepsin S	Inverse variance weighted	7	-0.015285	0.0135132	0.258005	-0.0417708	0.0112008	0.984831	0.95909	1.01126	22.3469	0.517906	0.637994	0.566	1
470	Benign tumors: scapula and upper limb long bones	Cathepsin S	MR Egger	7	-0.00536218	0.0239942	0.832007	-0.0523908	0.0416665	0.994652	0.948958	1.04255		0.421555			0.991067
471	Benign tumors: scapula and upper limb long bones	Cathepsin S	Weighted median	7	-0.00751696	0.0173418	0.664681	-0.0415069	0.026473	0.992511	0.959343	1.02683					1
472	Benign tumors: scapula and upper limb long bones	Cathepsin S	Simple mode	7	0.00106944	0.0261859	0.968748	-0.0502549	0.0523938	1.00107	0.950987	1.05379					1
473	Benign tumors: scapula and upper limb long bones	Cathepsin S	Weighted mode	7	0.00277773	0.0222898	0.904896	-0.0409102	0.0464657	1.00278	0.959915	1.04756					1
474	Benign tumors: scapula and upper limb long bones	Cathepsin S	Maximum likelihood	7	-0.0157925	0.0139054	0.256078	-0.043047	0.0114621	0.984332	0.957866	1.01153					1
475	Benign tumors: scapula and upper limb long bones	Cathepsin L2	Inverse variance weighted	7	-0.00128204	0.0164971	0.938056	-0.0336163	0.0310523	0.998719	0.966942	1.03154	22.3469	0.177272	0.481048	0.183	1
476	Benign tumors: scapula and upper limb long bones	Cathepsin L2	MR Egger	7	0.017814	0.0303737	0.58302	-0.0417184	0.0773464	1.01797	0.95914	1.08042		0.155812			1
477	Benign tumors: scapula and upper limb long bones	Cathepsin L2	Weighted median	7	0.00827894	0.0194892	0.670986	-0.02992	0.0464778	1.00831	0.970523	1.04757					1
478	Benign tumors: scapula and upper limb long bones	Cathepsin L2	Simple mode	7	0.0234157	0.0361774	0.541428	-0.047492	0.0943235	1.02369	0.953618	1.09892					1
479	Benign tumors: scapula and upper limb long bones	Cathepsin L2	Weighted mode	7	0.0268243	0.0342341	0.463101	-0.0402746	0.0939232	1.02719	0.960526	1.09848					1
480	Benign tumors: scapula and upper limb long bones	Cathepsin L2	Maximum likelihood	7	-0.00138511	0.0140312	0.921363	-0.0288863	0.0261161	0.998616	0.971527	1.02646					1
481	Benign tumors: scapula and upper limb long bones	Cathepsin Z	Inverse variance weighted	7	0.00179735	0.0135199	0.89424	-0.0247016	0.0282963	1.0018	0.975601	1.0287	22.3469	0.903511	0.627763	0.882	1
482	Benign tumors: scapula and upper limb long bones	Cathepsin Z	MR Egger	7	0.0120348	0.0240042	0.637405	-0.0350134	0.0590831	1.01211	0.965592	1.06086		0.862442			1
483	Benign tumors: scapula and upper limb long bones	Cathepsin Z	Weighted median	7	0.00366609	0.0167254	0.8265	-0.0291157	0.0364479	1.00367	0.971304	1.03712					1
484	Benign tumors: scapula and upper limb long bones	Cathepsin Z	Simple mode	7	-0.0154027	0.0251553	0.562806	-0.0647071	0.0339016	0.984715	0.937342	1.03448					1
485	Benign tumors: scapula and upper limb long bones	Cathepsin Z	Weighted mode	7	0.0191222	0.0228545	0.434817	-0.0256727	0.063917	1.01931	0.974654	1.066					1
486	Benign tumors: scapula and upper limb long bones	Cathepsin Z	Maximum likelihood	7	0.00181759	0.0136343	0.893949	-0.0249057	0.0285408	1.00182	0.975402	1.02895					0.998756
487	Benign tumor: short bones of the lower limbs	Cathepsin B	Inverse variance weighted	4	-0.00154879	0.00506874	0.759942	-0.0114835	0.00838594	0.998452	0.988582	1.00842	22.2392	0.378604	0.776486	0.803	1
488	Benign tumor: short bones of the lower limbs	Cathepsin B	MR Egger	4	-0.000713416	0.00657634	0.923516	-0.013603	0.0121762	0.999287	0.986489	1.01225		0.230903			0.997397
489	Benign tumor: short bones of the lower limbs	Cathepsin B	Weighted median	4	-0.00160288	0.005357	0.764777	-0.0121026	0.00889683	0.998398	0.98797	1.00894					1
490	Benign tumor: short bones of the lower limbs	Cathepsin B	Simple mode	4	-0.000705513	0.0163931	0.968376	-0.0328361	0.031425	0.999295	0.967697	1.03192					1
491	Benign tumor: short bones of the lower limbs	Cathepsin B	Weighted mode	4	-0.00153952	0.00477588	0.768344	-0.0109002	0.0078212	0.998462	0.989159	1.00785					1
492	Benign tumor: short bones of the lower limbs	Cathepsin B	Maximum likelihood	4	-0.0015535	0.00501387	0.756681	-0.0113807	0.00827367	0.998448	0.988684	1.00831					1
493	Benign tumor: short bones of the lower limbs	Cathepsin F	Inverse variance weighted	4	0.0122638	0.00624157	0.0494304	3.03e-05	0.0244973	1.01234	1.00003	1.0248	22.2392	0.196341	0.941112	0.676	1
494	Benign tumor: short bones of the lower limbs	Cathepsin F	MR Egger	4	0.0125348	0.00829365	0.269812	-0.00372075	0.0287903	1.01261	0.996286	1.02921		0.0968537			1
495	Benign tumor: short bones of the lower limbs	Cathepsin F	Weighted median	4	0.012106	0.00641007	0.0589473	-0.000457766	0.0246697	1.01218	0.999542	1.02498					1
496	Benign tumor: short bones of the lower limbs	Cathepsin F	Simple mode	4	0.0138824	0.0174481	0.48438	-0.0203159	0.0480807	1.01398	0.979889	1.04926					1
497	Benign tumor: short bones of the lower limbs	Cathepsin F	Weighted mode	4	0.01224	0.00556169	0.115089	0.00133909	0.0231409	1.01232	1.00134	1.02341					1
498	Benign tumor: short bones of the lower limbs	Cathepsin F	Maximum likelihood	4	0.0124061	0.00565088	0.0281334	0.00133033	0.0234818	1.01248	1.00133	1.02376					1
499	Benign tumor: short bones of the lower limbs	Cathepsin G	Inverse variance weighted	4	-0.00173276	0.00499788	0.728817	-0.0115286	0.00806308	0.998269	0.988538	1.0081	22.2392	0.568392	0.319716	0.486	1
500	Benign tumor: short bones of the lower limbs	Cathepsin G	MR Egger	4	-0.00452552	0.00543192	0.492416	-0.0151721	0.00612103	0.995485	0.984942	1.00614		0.862226			1
501	Benign tumor: short bones of the lower limbs	Cathepsin G	Weighted median	4	-0.00192743	0.00548582	0.725327	-0.0126796	0.00882477	0.998074	0.9874	1.00886					1
502	Benign tumor: short bones of the lower limbs	Cathepsin G	Simple mode	4	0.0242654	0.017329	0.255932	-0.00969934	0.0582302	1.02456	0.990348	1.05996					1
503	Benign tumor: short bones of the lower limbs	Cathepsin G	Weighted mode	4	-0.00350745	0.00517676	0.546638	-0.0136539	0.00663901	0.996499	0.986439	1.00666					1
504	Benign tumor: short bones of the lower limbs	Cathepsin G	Maximum likelihood	4	-0.00173656	0.00497942	0.727279	-0.0114962	0.00802311	0.998265	0.98857	1.00806					1
505	Benign tumor: short bones of the lower limbs	Cathepsin E	Inverse variance weighted	4	0.00159892	0.00522141	0.759434	-0.00863505	0.0118329	1.0016	0.991402	1.0119	22.2392	0.351228	0.234769	0.49	1
506	Benign tumor: short bones of the lower limbs	Cathepsin E	MR Egger	4	0.00517567	0.00543192	0.44124	-0.00547088	0.0158222	1.00519	0.994544	1.01595		0.799174			1
507	Benign tumor: short bones of the lower limbs	Cathepsin E	Weighted median	4	0.00268325	0.00559668	0.631629	-0.00828625	0.0136527	1.00269	0.991748	1.01375					1
508	Benign tumor: short bones of the lower limbs	Cathepsin E	Simple mode	4	0.00137783	0.0169133	0.940203	-0.0317723	0.034528	1.00138	0.968727	1.03513					1
509	Benign tumor: short bones of the lower limbs	Cathepsin E	Weighted mode	4	0.00313831	0.00556627	0.612282	-0.00777157	0.0140482	1.00314	0.992259	1.01415					1
510	Benign tumor: short bones of the lower limbs	Cathepsin E	Maximum likelihood	4	0.00160614	0.00498616	0.747362	-0.00816673	0.011379	1.00161	0.991867	1.01144					1
511	Benign tumor: short bones of the lower limbs	Cathepsin H	Inverse variance weighted	4	0.00684667	0.00657373	0.297635	-0.00603785	0.0197312	1.00687	0.99398	1.01993	22.2392	0.157887	0.75207	0.488	1
512	Benign tumor: short bones of the lower limbs	Cathepsin H	MR Egger	4	0.00564484	0.00847722	0.574008	-0.0109705	0.0222602	1.00566	0.989089	1.02251		0.0872433			1
513	Benign tumor: short bones of the lower limbs	Cathepsin H	Weighted median	4	0.00512503	0.00547841	0.349533	-0.00561266	0.0158627	1.00514	0.994403	1.01599					1
514	Benign tumor: short bones of the lower limbs	Cathepsin H	Simple mode	4	0.00525828	0.0122449	0.696586	-0.0187417	0.0292582	1.00527	0.981433	1.02969					1
515	Benign tumor: short bones of the lower limbs	Cathepsin H	Weighted mode	4	0.00510596	0.00550604	0.422152	-0.00568588	0.0158978	1.00512	0.99433	1.01602					1
516	Benign tumor: short bones of the lower limbs	Cathepsin H	Maximum likelihood	4	0.007055	0.00542313	0.19329	-0.00357434	0.0176843	1.00708	0.996432	1.01784					0.948876
517	Benign tumor: short bones of the lower limbs	Cathepsin O	Inverse variance weighted	4	0.00686295	0.0049944	0.169402	-0.00292607	0.016652	1.00689	0.997078	1.01679	22.2392	0.884932	0.617797	0.836	1
518	Benign tumor: short bones of the lower limbs	Cathepsin O	MR Egger	4	0.00810647	0.00542805	0.273895	-0.0025325	0.0187454	1.00814	0.997471	1.01892		0.857396			1
519	Benign tumor: short bones of the lower limbs	Cathepsin O	Weighted median	4	0.0069788	0.00592042	0.238491	-0.00462523	0.0185828	1.007	0.995385	1.01876					1
520	Benign tumor: short bones of the lower limbs	Cathepsin O	Simple mode	4	-0.00888075	0.013153	0.547938	-0.0346606	0.0168991	0.991159	0.965933	1.01704					1
521	Benign tumor: short bones of the lower limbs	Cathepsin O	Weighted mode	4	0.00743764	0.0051308	0.243034	-0.00261872	0.017494	1.00747	0.997385	1.01765					1
522	Benign tumor: short bones of the lower limbs	Cathepsin O	Maximum likelihood	4	0.00683741	0.00512884	0.182489	-0.00321512	0.0168899	1.00686	0.99679	1.01703					0.953654
523	Benign tumor: short bones of the lower limbs	Cathepsin S	Inverse variance weighted	4	0.00876384	0.00694782	0.207172	-0.00485389	0.0223816	1.0088	0.995158	1.02263	22.2392	0.121441	0.880417	0.58	1
524	Benign tumor: short bones of the lower limbs	Cathepsin S	MR Egger	4	0.0093765	0.00918201	0.414583	-0.00862024	0.0273732	1.00942	0.991417	1.02775		0.0571842			1
525	Benign tumor: short bones of the lower limbs	Cathepsin S	Weighted median	4	0.00809326	0.00609373	0.184136	-0.00385046	0.020037	1.00813	0.996157	1.02024					1
526	Benign tumor: short bones of the lower limbs	Cathepsin S	Simple mode	4	0.00109951	0.0171188	0.952829	-0.0324533	0.0346523	1.0011	0.968068	1.03526					1
527	Benign tumor: short bones of the lower limbs	Cathepsin S	Weighted mode	4	0.00806555	0.0054541	0.235734	-0.00262449	0.0187556	1.0081	0.997379	1.01893					1
528	Benign tumor: short bones of the lower limbs	Cathepsin S	Maximum likelihood	4	0.00889226	0.00540033	0.0996376	-0.00169239	0.0194769	1.00893	0.998309	1.01967					1
529	Benign tumor: short bones of the lower limbs	Cathepsin L2	Inverse variance weighted	4	0.00529376	0.0049944	0.289172	-0.00449526	0.0150828	1.00531	0.995515	1.0152	22.2392	0.959095	0.764415	0.795	1
530	Benign tumor: short bones of the lower limbs	Cathepsin L2	MR Egger	4	0.00602257	0.00542805	0.382743	-0.0046164	0.0166615	1.00604	0.995394	1.0168		0.910544			1
531	Benign tumor: short bones of the lower limbs	Cathepsin L2	Weighted median	4	0.00578226	0.00576227	0.315635	-0.00551179	0.0170763	1.0058	0.994503	1.01722					1
532	Benign tumor: short bones of the lower limbs	Cathepsin L2	Simple mode	4	-0.00718804	0.0129248	0.6169	-0.0325206	0.0181445	0.992838	0.968003	1.01831					1
533	Benign tumor: short bones of the lower limbs	Cathepsin L2	Weighted mode	4	0.00591059	0.00525679	0.342701	-0.00439271	0.0162139	1.00593	0.995617	1.01635					1
534	Benign tumor: short bones of the lower limbs	Cathepsin L2	Maximum likelihood	4	0.005273	0.00505523	0.296912	-0.00463524	0.0151812	1.00529	0.995375	1.0153					1
535	Benign tumor: short bones of the lower limbs	Cathepsin Z	Inverse variance weighted	4	0.00770364	0.00566185	0.173633	-0.00339359	0.0188009	1.00773	0.996612	1.01898	22.2392	0.278093	0.465457	0.482	1
536	Benign tumor: short bones of the lower limbs	Cathepsin Z	MR Egger	4	0.00547167	0.00636959	0.480845	-0.00701273	0.0179561	1.00549	0.993012	1.01812		0.252826			1
537	Benign tumor: short bones of the lower limbs	Cathepsin Z	Weighted median	4	0.00607036	0.00599521	0.311282	-0.00568024	0.017821	1.00609	0.994336	1.01798					1
538	Benign tumor: short bones of the lower limbs	Cathepsin Z	Simple mode	4	0.0135687	0.0177147	0.499451	-0.0211521	0.0482895	1.01366	0.97907	1.04947					1
539	Benign tumor: short bones of the lower limbs	Cathepsin Z	Weighted mode	4	0.00603526	0.00505243	0.318105	-0.0038675	0.015938	1.00605	0.99614	1.01607					1
540	Benign tumor: short bones of the lower limbs	Cathepsin Z	Maximum likelihood	4	0.00799971	0.0055639	0.150494	-0.00290553	0.0189049	1.00803	0.997099	1.01908					0.9752
541	Benign tumor: short bones in the upper limb	Cathepsin B	Inverse variance weighted	10	0.0181379	0.0163439	0.2671	-0.0138962	0.050172	1.0183	0.9862	1.05145	21.8667	0.474266	0.191318	0.486	1
542	Benign tumor: short bones in the upper limb	Cathepsin B	MR Egger	10	-0.0425698	0.0455634	0.377488	-0.131874	0.0467344	0.958324	0.876451	1.04784		0.583644			1
543	Benign tumor: short bones in the upper limb	Cathepsin B	Weighted median	10	0.0196647	0.0228047	0.388516	-0.0250324	0.0643619	1.01986	0.975278	1.06648					1
544	Benign tumor: short bones in the upper limb	Cathepsin B	Simple mode	10	0.014032	0.0364136	0.708928	-0.0573387	0.0854027	1.01413	0.944274	1.08916					1
545	Benign tumor: short bones in the upper limb	Cathepsin B	Weighted mode	10	0.0281102	0.0348857	0.441139	-0.0402657	0.0964861	1.02851	0.960534	1.10129					1
546	Benign tumor: short bones in the upper limb	Cathepsin B	Maximum likelihood	10	0.0189663	0.016732	0.256992	-0.0138285	0.051761	1.01915	0.986267	1.05312					1
547	Benign tumor: short bones in the upper limb	Cathepsin F	Inverse variance weighted	10	-0.0444012	0.0163513	0.0066186	-0.0764498	-0.0123526	0.95657	0.926399	0.987723	21.8667	0.480683	0.545176	0.553	1
548	Benign tumor: short bones in the upper limb	Cathepsin F	MR Egger	10	-0.0714957	0.0459486	0.158321	-0.161555	0.0185635	0.931	0.85082	1.01874		0.420389			1
549	Benign tumor: short bones in the upper limb	Cathepsin F	Weighted median	10	-0.0387232	0.0226162	0.0868624	-0.083051	0.00560461	0.962017	0.920304	1.00562					1
550	Benign tumor: short bones in the upper limb	Cathepsin F	Simple mode	10	-0.027664	0.0336138	0.431776	-0.093547	0.0382191	0.972715	0.910695	1.03896					1
551	Benign tumor: short bones in the upper limb	Cathepsin F	Weighted mode	10	-0.0350298	0.0330371	0.316625	-0.0997825	0.0297229	0.965577	0.905034	1.03017					1
552	Benign tumor: short bones in the upper limb	Cathepsin F	Maximum likelihood	10	-0.0460533	0.017033	0.00685572	-0.0794379	-0.0126687	0.954991	0.923635	0.987411					1
553	Benign tumor: short bones in the upper limb	Cathepsin G	Inverse variance weighted	10	-0.00941545	0.0208869	0.652146	-0.0503537	0.0315228	0.990629	0.950893	1.03202	21.8667	0.100013	0.321496	0.097	1
554	Benign tumor: short bones in the upper limb	Cathepsin G	MR Egger	10	-0.0664658	0.0578387	0.283686	-0.17983	0.0468981	0.935695	0.835412	1.04802		0.115879			1
555	Benign tumor: short bones in the upper limb	Cathepsin G	Weighted median	10	0.00486399	0.0242232	0.840856	-0.0426135	0.0523415	1.00488	0.958282	1.05374					1
556	Benign tumor: short bones in the upper limb	Cathepsin G	Simple mode	10	0.00299839	0.0379866	0.938813	-0.0714553	0.0774521	1.003	0.931038	1.08053					1
557	Benign tumor: short bones in the upper limb	Cathepsin G	Weighted mode	10	0.00631417	0.0373775	0.869588	-0.0669458	0.0795741	1.00633	0.935246	1.08283					1
558	Benign tumor: short bones in the upper limb	Cathepsin G	Maximum likelihood	10	-0.0101482	0.0169424	0.549186	-0.0433553	0.023059	0.989903	0.957571	1.02333					1
559	Benign tumor: short bones in the upper limb	Cathepsin E	Inverse variance weighted	10	0.0160509	0.0163513	0.326283	-0.0159977	0.0480995	1.01618	0.98413	1.04928	21.8667	0.820588	0.414867	0.833	1
560	Benign tumor: short bones in the upper limb	Cathepsin E	MR Egger	10	0.0526231	0.0455655	0.281464	-0.0366853	0.141932	1.05403	0.963979	1.1525		0.817815			1
561	Benign tumor: short bones in the upper limb	Cathepsin E	Weighted median	10	0.0253978	0.0216144	0.239979	-0.0169665	0.0677621	1.02572	0.983177	1.07011					1
562	Benign tumor: short bones in the upper limb	Cathepsin E	Simple mode	10	0.0454656	0.0343981	0.218861	-0.0219546	0.112886	1.04652	0.978285	1.1195					1
563	Benign tumor: short bones in the upper limb	Cathepsin E	Weighted mode	10	0.0383602	0.0340861	0.289538	-0.0284485	0.105169	1.03911	0.971952	1.1109					1
564	Benign tumor: short bones in the upper limb	Cathepsin E	Maximum likelihood	10	0.0165815	0.0166506	0.319321	-0.0160536	0.0492166	1.01672	0.984075	1.05045					1
565	Benign tumor: short bones in the upper limb	Cathepsin H	Inverse variance weighted	10	-0.00328741	0.0164983	0.842062	-0.0356241	0.0290493	0.996718	0.965003	1.02948	21.8667	0.422839	0.677061	0.413	1
566	Benign tumor: short bones in the upper limb	Cathepsin H	MR Egger	10	-0.0227427	0.0482311	0.64985	-0.117276	0.0717902	0.977514	0.88934	1.07443		0.346625			0.983885
567	Benign tumor: short bones in the upper limb	Cathepsin H	Weighted median	10	-0.000276499	0.0238537	0.990752	-0.0470298	0.0464768	0.999724	0.954059	1.04757					0.996905
568	Benign tumor: short bones in the upper limb	Cathepsin H	Simple mode	10	-0.00104512	0.0372193	0.978211	-0.073995	0.0719047	0.998955	0.928676	1.07455					1
569	Benign tumor: short bones in the upper limb	Cathepsin H	Weighted mode	10	0.00382055	0.0354185	0.916466	-0.0655998	0.0732409	1.00383	0.936506	1.07599					1
570	Benign tumor: short bones in the upper limb	Cathepsin H	Maximum likelihood	10	-0.00345077	0.0167153	0.836444	-0.0362127	0.0293112	0.996555	0.964435	1.02974					1
571	Benign tumor: short bones in the upper limb	Cathepsin O	Inverse variance weighted	10	-0.00874237	0.017023	0.607558	-0.0421074	0.0246227	0.991296	0.958767	1.02493	21.8667	0.370833	0.119375	0.346	1
572	Benign tumor: short bones in the upper limb	Cathepsin O	MR Egger	10	0.0654344	0.045575	0.188996	-0.0238927	0.154761	1.06762	0.976391	1.16738		0.567917			1
573	Benign tumor: short bones in the upper limb	Cathepsin O	Weighted median	10	-0.00780206	0.0231043	0.735598	-0.0530865	0.0374824	0.992228	0.948298	1.03819					1
574	Benign tumor: short bones in the upper limb	Cathepsin O	Simple mode	10	-0.00979208	0.0399985	0.812093	-0.0881892	0.068605	0.990256	0.915588	1.07101					1
575	Benign tumor: short bones in the upper limb	Cathepsin O	Weighted mode	10	-0.00645946	0.0383086	0.869827	-0.0815443	0.0686254	0.993561	0.921692	1.07103					1
576	Benign tumor: short bones in the upper limb	Cathepsin O	Maximum likelihood	10	-0.00937568	0.0168396	0.577689	-0.0423813	0.0236299	0.990668	0.958504	1.02391					0.995591
577	Benign tumor: short bones in the upper limb	Cathepsin S	Inverse variance weighted	10	-0.0171132	0.0172509	0.32119	-0.050925	0.0166986	0.983032	0.95035	1.01684	21.8667	0.349371	0.577075	0.37	1
578	Benign tumor: short bones in the upper limb	Cathepsin S	MR Egger	10	0.00999656	0.0499653	0.846418	-0.0879353	0.107928	1.01005	0.91582	1.11397		0.293623			0.993621
579	Benign tumor: short bones in the upper limb	Cathepsin S	Weighted median	10	-0.0225659	0.0235839	0.33865	-0.0687903	0.0236585	0.977687	0.933522	1.02394					1
580	Benign tumor: short bones in the upper limb	Cathepsin S	Simple mode	10	-0.0471496	0.0399988	0.268712	-0.125547	0.0312481	0.953945	0.882014	1.03174					1
581	Benign tumor: short bones in the upper limb	Cathepsin S	Weighted mode	10	-0.0379737	0.0372997	0.33523	-0.111081	0.0351337	0.962738	0.894866	1.03576					1
582	Benign tumor: short bones in the upper limb	Cathepsin S	Maximum likelihood	10	-0.0179448	0.0168006	0.285475	-0.0508739	0.0149844	0.982215	0.950398	1.0151					1
583	Benign tumor: short bones in the upper limb	Cathepsin L2	Inverse variance weighted	10	-0.0119002	0.0212787	0.575988	-0.0536065	0.029806	0.98817	0.947805	1.03025	21.8667	0.0845135	0.673486	0.084	1
584	Benign tumor: short bones in the upper limb	Cathepsin L2	MR Egger	10	0.0134675	0.062155	0.833884	-0.108356	0.135291	1.01356	0.897308	1.14487		0.0614065			0.986053
585	Benign tumor: short bones in the upper limb	Cathepsin L2	Weighted median	10	-0.0248665	0.0234894	0.28977	-0.0709058	0.0211728	0.97544	0.93155	1.0214					1
586	Benign tumor: short bones in the upper limb	Cathepsin L2	Simple mode	10	-0.0262303	0.0392114	0.520318	-0.103085	0.050624	0.974111	0.902051	1.05193					1
[truncated: 1,430 more rows]
